# Supplementary material for: Coordinated responses to individual tumor antigens by IgG antibody and CD8+ T cells following cancer vaccination
Source: J Immunother Cancer. 2018 Apr 5;6:27. doi: 10.1186/s40425-018-0331-0 (PMC5885379; doi:10.1186/s40425-018-0331-0)
Supplement: Supplementary file 1 — Table S1. 4T1 Exome Overlap. Comparison of independent 4T1 whole exome sequencing analysis and prior literature. Table S2. Preliminary IgG Peptide Array. Table S3. IgG Peptide Array and ELISAs. Table S4. TMT Mass Spectrometry. (XLSX 2550 kb) [file 40425_2018_331_MOESM1_ESM.xlsx]

## Sheet: ReadMe
Data File S1	in support of "Coordinated responses to individual tumor antigens by IgG antibody and CD8+ T cells following cancer vaccination" by Hulett et al., 2018
Tab 1: 4T1 Exome Overlap. Comparison of independent 4T1 whole exome sequencing analysis and prior literature.
Column	Header	Description
A	Variation	Genomic variant coordinate and heterozygous change in 4T1
B	Location	Genomic variant coordinate
C	Gene	MGI gene name
D	Zygosity	Confirmation this is a heterozygous SNV in 4T1 and not a SNP polymorphism
E	Consequence	Confirmation of single letter non-synonymous change
F	Mutation Site in Transcript used for Peptide Array	Protein coding location and amino acid change of SNV mutation for transcript printed
G	Selected for IgG Peptide Array	Printed on IgG 15mer array for experiments
H	Parent Protein LC-MS/MS Confirmed?	True if protein containing the mutation was confirmed by mass spectrometry in the 4T1 cells and autophaogosome vaccine used in these experiments
I	Feature	NCBI Reference Sequence for specific transcript
J	All RefSeq Transcript Coordinates of Neoepitope-site	Selected protein transcript and alternate splice transcripts (if available)
K	MATCH Castle et al.	Independently verified SNV matches Castle & Krieter et al (36,37); match at 'Gene' and 'All RefSeq Transcript Coordinates of Neoepitope-site' (Mutated tumor alleles are expressed according to their DNA frequency)
L	MATCH Kim et al.	Independently verified SNV matches Kim et al (35); match at 'Gene' and 'All RefSeq Transcript Coordinates of Neoepitope-site' (Eradication of metastatic mouse cancers resistant to immune checkpoint blockade by suppression of myeloid-derived cells)
Tab 2: Preliminary IgG Peptide Array. Normalized data from custom 15mer peptide array of 4T1 SNVs and WT alleles centered at mutation sites identified by sequencing.
Column	Header	Description
A	Gene	MGI gene name or AH1 retrovirus fragment
B	Neoepitope-site Coordinate	Protein coding location and amino acid change of SNV mutation for transcript printed
C	Neoepitope-site Version (SNP/WT)	Is this peptide an autologous WT version or mutated SNV version of the mutation site?
D	Peptide Array Printed Sequence Length	Length of printed peptide
E	LC-MS/MS Confirmed Parent Protein?	True if protein containing the mutation was confirmed by mass spectrometry in the 4T1 cells and autophaogosome vaccine used in these experiments (Tab 3)
F	Independently Confirmed Neoepitope-Site by Whole Exome Sequencing	True if SNV was independently confirmed by whole exome sequencing
G	Krieter et al. 2015 "Immunogenic 4T1 Mutations"	Previously reported as an immunogenic 4T1 neoantigen (36).
H	Krieter et al. 2015 "Immunogenic 4T1 Mutations" Reactive Subtype	Previously reported T cell subtype reactive to this immunogenic 4T1 neoantigen (36)
I	Peptide Array Printed Up to 15mer Sequence	Peptide sequence printed on the custom IgG array
J	Selected for Cellular Splenocyte Assays?	True if IFNγ T cell assays were also performed for this peptide
K	TOP PEPTIDE MHCI H2-Kd,Dd,Ld 1-log50k Windowed 9-11mers NetMHC Pan v2.8	Sequence of top-predicted 8-11mer MHCI binding peptide surrounding this mutation site out of all possible BALB/c MHCI isoforms.
L	TOP PEPTIDE LENGTH MHCI H2-Kd,Dd,Ld 1-log50k Windowed 9-11mers NetMHC Pan v2.8	Length of top MHCI binding sequence
M	TOP SCORE ISOFORM MHCI H2-Kd,Dd,Ld 1-log50k Windowed 9-11mers NetMHC Pan v2.8	Specific MHCI isoform this peptide is predicted to bind
N	TOP SCORE MHCI H2-Kd,Dd,Ld 1-log50k Windowed 9-11mers NetMHC Pan v2.8	Predicted binding affinity of peptide to MHC isoform in log-scale. 50,000nM -> logAff=0; 500nM -> logAff=0.426; 50nM -> logAff=0.638; 1nM -> logAff=1.000.
O	TOP PEPTIDE MHCII H2-IAd 1-log50k Windowed 15mers NetMHCII v2.2	Sequence of top-predicted 15mer MHCII peptide surrounding this mutation site for H2-Iad.
P	TOP SCORE MHCII H2-IAd 1-log50k Windowed 15mers NetMHCII v2.2	Predicted binding affinity of peptide to MHC isoform in log-scale. 50,000nM -> logAff=0; 500nM -> logAff=0.426; 50nM -> logAff=0.638; 1nM -> logAff=1.000.
Q	R4 Naïve Normalized IgG Signal Intensity	Interquartile range normalized average of thee replicate peptide spots for IgG binding to this peptide in this naïve sample group
R	R5 Naïve Normalized IgG Signal Intensity	Interquartile range normalized average of thee replicate peptide spots for IgG binding to this peptide in this naïve sample group
S	R4 R5 Average Naïve Normalized IgG Signal Intensity	Average of the two normalized naïve experiments for IgG binding to this peptide.
T	R1 poly-I:C Only Normalized IgG Signal Intensity	Interquartile range normalized average of thee replicate peptide spots for IgG binding to this peptide in this adjuvant-only control sample group
U	R3 poly-I:C Only Normalized IgG Signal Intensity	Interquartile range normalized average of thee replicate peptide spots for IgG binding to this peptide in this adjuvant-only control sample group
V	R4 poly-I:C Only Normalized IgG Signal Intensity	Interquartile range normalized average of thee replicate peptide spots for IgG binding to this peptide in this adjuvant-only control sample group
W	R5 poly-I:C Only Normalized IgG Signal Intensity	Interquartile range normalized average of thee replicate peptide spots for IgG binding to this peptide in this adjuvant-only control sample group
X	R1 4T1 Vaccine + poly-I:C Normalized IgG Signal Intensity	Interquartile range normalized average of thee replicate peptide spots for IgG binding to this peptide in this vaccine + adjuvant sample group
Y	R3 4T1 Vaccine + poly-I:C Normalized IgG Signal Intensity	Interquartile range normalized average of thee replicate peptide spots for IgG binding to this peptide in this vaccine + adjuvant sample group
Z	R4 4T1 Vaccine + poly-I:C Normalized IgG Signal Intensity	Interquartile range normalized average of thee replicate peptide spots for IgG binding to this peptide in this vaccine + adjuvant sample group
AA	R5 4T1 Vaccine + poly-I:C Normalized IgG Signal Intensity	Interquartile range normalized average of thee replicate peptide spots for IgG binding to this peptide in this vaccine + adjuvant sample group
AB	R1 R3 R4 R5 Average 4T1 Vaccine + poly-I:C Normalized IgG Signal Intensity	Average of the four normalized vaccine + adjuvant experiments for IgG binding to this peptide.
AC	R1 Difference 4T1 Vaccine + poly-I:C versus poly-I:C only Normalized IgG Signal Intensity	Difference between normalized average IgG signals in vaccine + adjuvant animals versus paired adjuvant only control animals in this experimental replicate.
AD	R3 Difference 4T1 Vaccine + poly-I:C versus poly-I:C only Normalized IgG Signal Intensity	Difference between normalized average IgG signals in vaccine + adjuvant animals versus paired adjuvant only control animals in this experimental replicate.
AE	R4 Difference 4T1 Vaccine + poly-I:C versus poly-I:C only Normalized IgG Signal Intensity	Difference between normalized average IgG signals in vaccine + adjuvant animals versus paired adjuvant only control animals in this experimental replicate.
AF	R5 Difference 4T1 Vaccine + poly-I:C versus poly-I:C only Normalized IgG Signal Intensity	Difference between normalized average IgG signals in vaccine + adjuvant animals versus paired adjuvant only control animals in this experimental replicate.
AG	R1 R3 R4 R5 Average Difference 4T1 Vaccine + poly-I:C versus poly-I:C only Normalized IgG Signal Intensity	Average of four independent experimental differences in normalized average IgG signals for vaccine + adjuvant versus adjuvant only. Increases are favored in vaccine groups.
Tab 3: IgG Peptide Array and ELISAs. Raw data from custom 15mer peptide array of 4T1 SNVs and WT alleles centered at mutation sites identified by sequencing and IFNg ELISA data from same experiments.
Column	Header	Description
A	Gene	MGI gene name or AH1 retrovirus fragment
B	Neoepitope-site Coordinate	Protein coding location and amino acid change of SNV mutation for transcript printed
C	Neoepitope-site Version (SNP/WT)	Is this peptide an autologous WT version or mutated SNV version of the mutation site?
D	Peptide Array Printed Sequence Length	Length of printed peptide
E	LC-MS/MS Confirmed Parent Protein?	True if protein containing the mutation was confirmed by mass spectrometry in the 4T1 cells and autophaogosome vaccine used in these experiments (Tab 3)
F	Independently Confirmed Neoepitope-Site by Whole Exome Sequencing	True if SNV was independently confirmed by whole exome sequencing
G	Krieter et al. 2015 "Immunogenic 4T1 Mutations"	Previously reported as an immunogenic 4T1 neoantigen (36).
H	Krieter et al. 2015 "Immunogenic 4T1 Mutations" Reactive Subtype	Previously reported T cell subtype reactive to this immunogenic 4T1 neoantigen (36)
I	Peptide Array Printed Up to 15mer Sequence	Peptide sequence printed on the custom IgG array
J	Selected for Cellular Splenocyte Assays?	True if IFNγ T cell assays were also performed for this peptide
K	TOP PEPTIDE MHCI H2-Kd,Dd,Ld 1-log50k Windowed 9-11mers NetMHC Pan v2.8	Sequence of top-predicted 8-11mer MHCI binding peptide surrounding this mutation site out of all possible BALB/c MHCI isoforms.
L	TOP PEPTIDE LENGTH MHCI H2-Kd,Dd,Ld 1-log50k Windowed 9-11mers NetMHC Pan v2.8	Length of top MHCI binding sequence
M	TOP SCORE ISOFORM MHCI H2-Kd,Dd,Ld 1-log50k Windowed 9-11mers NetMHC Pan v2.8	Specific MHCI isoform this peptide is predicted to bind
N	TOP SCORE MHCI H2-Kd,Dd,Ld 1-log50k Windowed 9-11mers NetMHC Pan v2.8	Predicted binding affinity of peptide to MHC isoform in log-scale. 50,000nM -> logAff=0; 500nM -> logAff=0.426; 50nM -> logAff=0.638; 1nM -> logAff=1.000.
O	8-11mer PEPTIDE PRINTED FOR T CELL ASSAYS - MATCHES FRAME OF SNV AND WT MAY NOT BE SAME AS OVERALL TOP WT MHCI BINDER	Exact peptide printed for 8-11mer T cell assays for CD8+ stimulation in vitro (Fig. 3, Fig. 4, Fig. 5, Fig. 6)
P	TOP PEPTIDE MHCII H2-IAd 1-log50k Windowed 15mers NetMHCII v2.2	Sequence of top-predicted 15mer MHCII peptide surrounding this mutation site for H2-Iad.
Q	TOP SCORE MHCII H2-IAd 1-log50k Windowed 15mers NetMHCII v2.2	Predicted binding affinity of peptide to MHC isoform in log-scale. 50,000nM -> logAff=0; 500nM -> logAff=0.426; 50nM -> logAff=0.638; 1nM -> logAff=1.000.
R	IgG Array Signal Intensity R7 Naïve Raw IgG Signal Intensity	IgG signal intensity; the average of three replicate spots per value for IgG binding to this peptide in this control naïve sample group.
S	IgG Array Signal Intensity R8 Naïve Raw IgG Signal Intensity	IgG signal intensity; the average of three replicate spots per value for IgG binding to this peptide in this control naïve sample group.
T	IgG Array Signal Intensity R8b Naïve Peptide CD4 Depleted Raw IgG Signal Intensity	IgG signal intensity; the average of three replicate spots per value for IgG binding to this peptide in this control naïve sample group.
U	IgG Array Signal Intensity R9 Naïve Peptide CD4 Depleted Raw IgG Signal Intensity	IgG signal intensity; the average of three replicate spots per value for IgG binding to this peptide in this control naïve sample group.
V	IgG Array Signal Intensity R11 Naïve Peptide CD4 Depleted Raw IgG Signal Intensity	IgG signal intensity; the average of three replicate spots per value for IgG binding to this peptide in this control naïve sample group.
W	IgG Array Signal Intensity R6 autophagosome-enriched vaccine + poly I:C Raw IgG Signal Intensity	IgG signal intensity; the average of three replicate spots per value for IgG binding to this peptide in this vaccinated sample group.
X	IgG Array Signal Intensity R7 autophagosome-enriched vaccine + poly I:C Raw IgG Signal Intensity	IgG signal intensity; the average of three replicate spots per value for IgG binding to this peptide in this vaccinated sample group.
Y	IgG Array Signal Intensity R8 autophagosome-enriched vaccine + poly I:C Raw IgG Signal Intensity	IgG signal intensity; the average of three replicate spots per value for IgG binding to this peptide in this vaccinated sample group.
Z	IgG Array Signal Intensity R8b autophagosome-enriched vaccine + poly I:C CD4 Depleted Raw IgG Signal Intensity	IgG signal intensity; the average of three replicate spots per value for IgG binding to this peptide in this vaccinated sample group.
AA	IgG Array Signal Intensity R9 autophagosome-enriched vaccine + poly I:C CD4 Depleted Raw IgG Signal Intensity	IgG signal intensity; the average of three replicate spots per value for IgG binding to this peptide in this vaccinated sample group.
AB	IgG Array Signal Intensity R11 autophagosome-enriched vaccine + poly I:C CD4 Depleted Raw IgG Signal Intensity	IgG signal intensity; the average of three replicate spots per value for IgG binding to this peptide in this vaccinated sample group.
AC	IgG Array Signal Intensity R7 R8 Naïve Average Raw IgG Signal Intensity	IgG signal intensity average of naïve experiments used in whole splenocyte assays.
AD	IgG Array Signal Intensity R6 R7 R8 autophagosome-enriched vaccine + poly I:C Average Raw IgG Signal Intensity	IgG signal intensity average of vaccine experiments used in whole splenocyte assays.
AE	IgG Array Signal Intensity Difference in Preliminary IgG Signal Intensity	Difference between average IgG signal intensity for naïve versus vaccine groups from animals used in whole splenocyte assays.
AF	IgG Array Signal Intensity R7 R8 R8b R9 R11 Naïve Average Raw IgG Signal Intensity	Average IgG signal intensity for all 5 naïve serum arrays.
AG	IgG Array Signal Intensity R7 R8 R8b R9 R11 Average autophagosome-enriched vaccine + poly I:C Raw IgG Signal Intensity	Average IgG signal intensity for all 5 vaccine serum arrays.
AH	IgG Array Signal Intensity R7 Difference (Positive Increased in Vaccine Group over Naïve)	Difference between IgG signal for vaccine versus naïve sample groups in this experiment.
AI	IgG Array Signal Intensity R8 Difference (Positive Increased in Vaccine Group over Naïve)	Difference between IgG signal for vaccine versus naïve sample groups in this experiment.
AJ	IgG Array Signal Intensity R8b Difference (Positive Increased in Vaccine Group over Naïve)	Difference between IgG signal for vaccine versus naïve sample groups in this experiment.
AK	IgG Array Signal Intensity R9 Difference (Positive Increased in Vaccine Group over Naïve)	Difference between IgG signal for vaccine versus naïve sample groups in this experiment.
AL	IgG Array Signal Intensity R11 Difference (Positive Increased in Vaccine Group over Naïve)	Difference between IgG signal for vaccine versus naïve sample groups in this experiment.
AM	8-11mer IFNγ Preliminary R7 Naïve Peptide Restim Increase over Splenocyte Only Restim	Positive increase in IFNγ upon peptide restimulation versus no restimulation controls with irradiated splenocytes only.
AN	8-11mer IFNγ Preliminary R8 Naïve Peptide Restim Increase over Splenocyte Only Restim	Positive increase in IFNγ upon peptide restimulation versus no restimulation controls with irradiated splenocytes only.
AO	8-11mer IFNγ Preliminary R6 4T1 autophagosome-enriched vaccine + poly I:C Peptide Restim Increase over Splenocyte Only Restim	Positive increase in IFNγ upon peptide restimulation versus no restimulation controls with irradiated splenocytes only.
AP	8-11mer IFNγ Preliminary R7 4T1 autophagosome-enriched vaccine + poly I:C Peptide Restim Increase over Splenocyte Only Restim	Positive increase in IFNγ upon peptide restimulation versus no restimulation controls with irradiated splenocytes only.
AQ	8-11mer IFNγ Preliminary R8 4T1 autophagosome-enriched vaccine + poly I:C Peptide Restim Increase over Splenocyte Only Restim	Positive increase in IFNγ upon peptide restimulation versus no restimulation controls with irradiated splenocytes only.
AR	8-11mer IFNγ Preliminary R7 R8 Average Naïve Peptide Restim Increase over Splenocyte Only Restim	Average of positive increase in IFNγ upon peptide restimulation versus no restimulation controls with irradiated splenocytes only.
AS	8-11mer IFNγ Preliminary R6 R7 R8 Average 4T1 autophagosome-enriched vaccine + poly I:C Peptide Restim Increase over Splenocyte Only Restim	Average of positive increase in IFNγ upon peptide restimulation versus no restimulation controls with irradiated splenocytes only.
AT	8-11mer IFNγ Difference in Preliminary Average Vaccine Groups over Naïve	Average of vaccine group increase in IFNγ upon peptide restimulation versus no restimulation controls with irradiated splenocytes only versus naive.
AU	8-11mer IFNγ R8 Naïve CD4 Depleted Peptide Restim	IFNγ detected upon secondary stimulation with peptide and irradiated splenocytes with CD8+ enriched splenocytes
AV	8-11mer IFNγ R9 Naïve CD4 Depleted Peptide Restim	IFNγ detected upon secondary stimulation with peptide and irradiated splenocytes with CD8+ enriched splenocytes
AW	8-11mer IFNγ R11 Naïve CD4 Depleted Peptide Restim	IFNγ detected upon secondary stimulation with peptide and irradiated splenocytes with CD8+ enriched splenocytes
AX	8-11mer IFNγ R8 4T1 autophagosome-enriched vaccine + poly I:C CD4 Depleted Peptide Restim	IFNγ detected upon secondary stimulation with peptide and irradiated splenocytes with CD8+ enriched splenocytes
AY	8-11mer IFNγ R9 4T1 autophagosome-enriched vaccine + poly I:C CD4 Depleted Peptide Restim	IFNγ detected upon secondary stimulation with peptide and irradiated splenocytes with CD8+ enriched splenocytes
AZ	8-11mer IFNγ R11 4T1 autophagosome-enriched vaccine + poly I:C CD4 Depleted Peptide Restim	IFNγ detected upon secondary stimulation with peptide and irradiated splenocytes with CD8+ enriched splenocytes
BA	8-11mer IFNγ R8 INCREASE 4T1 autophagosome-enriched vaccine + poly I:C CD4 Depleted Peptide Restim	Vaccine group increase in IFNγ detected upon secondary stimulation with peptide and irradiated splenocytes with CD8+ enriched splenocytes
BB	8-11mer IFNγ R9 INCREASE 4T1 autophagosome-enriched vaccine + poly I:C CD4 Depleted Peptide Restim	Vaccine group increase in IFNγ detected upon secondary stimulation with peptide and irradiated splenocytes with CD8+ enriched splenocytes
BC	8-11mer IFNγ R11 INCREASE 4T1 autophagosome-enriched vaccine + poly I:C CD4 Depleted Peptide Restim	Vaccine group increase in IFNγ detected upon secondary stimulation with peptide and irradiated splenocytes with CD8+ enriched splenocytes
BD	8-11mer IFNγ R9 4T1 autophagosome-enriched vaccine + poly I:C CD4 Depleted Cells Only	IFNγ detected upon secondary stimulation with media only for CD8+ enriched splenocytes
BE	8-11mer IFNγ R11 4T1 autophagosome-enriched vaccine + poly I:C CD4 Depleted Cells Only	IFNγ detected upon secondary stimulation with media only for CD8+ enriched splenocytes
BF	8-11mer IFNγ R9 4T1 autophagosome-enriched vaccine + poly I:C CD4 Depleted 4T1 Tumor Restim	IFNγ detected upon secondary stimulation with live 4T1 tumor cells for CD8+ enriched splenocytes
BG	8-11mer IFNγ R11 4T1 autophagosome-enriched vaccine + poly I:C CD4 Depleted 4T1 Tumor Restim	IFNγ detected upon secondary stimulation with live 4T1 tumor cells for CD8+ enriched splenocytes
BH	8-11mer IFNγ R9 INCREASE 4T1 autophagosome-enriched vaccine + poly I:C CD4 Depleted 4T1 Tumor Restim	Increase in IFNγ detected upon secondary stimulation with live 4T1 tumor cells over media only for CD8+ enriched splenocytes
BI	8-11mer IFNγ R11 INCREASE 4T1 autophagosome-enriched vaccine + poly I:C CD4 Depleted 4T1 Tumor Restim	Increase in IFNγ detected upon secondary stimulation with live 4T1 tumor cells over media only for CD8+ enriched splenocytes
BJ	15mer IFNγ R7 Naïve Raw IgG Signal Intensity	Positive increase in IFNγ upon peptide restimulation versus no restimulation controls with irradiated splenocytes only.
BK	15mer IFNγ R8 Naïve Raw IgG Signal Intensity	Positive increase in IFNγ upon peptide restimulation versus no restimulation controls with irradiated splenocytes only.
BL	15mer IFNγ R6 autophagosome-enriched vaccine + poly I:C Raw IgG Signal Intensity	Positive increase in IFNγ upon peptide restimulation versus no restimulation controls with irradiated splenocytes only.
BM	15mer IFNγ R7 autophagosome-enriched vaccine + poly I:C Raw IgG Signal Intensity	Positive increase in IFNγ upon peptide restimulation versus no restimulation controls with irradiated splenocytes only.
BN	15mer IFNγ R8 autophagosome-enriched vaccine + poly I:C Raw IgG Signal Intensity	Positive increase in IFNγ upon peptide restimulation versus no restimulation controls with irradiated splenocytes only.
BO	15mer IFNγ Preliminary R7 R8 Average Naïve Peptide Restim Increase over Splenocyte Only Restim	Average of positive increase in IFNγ upon peptide restimulation versus no restimulation controls with irradiated splenocytes only.
BP	15mer IFNγ Preliminary R6 R7 R8 Average 4T1 autophagosome-enriched vaccine + poly I:C Peptide Restim Increase over Splenocyte Only Restim	Average of positive increase in IFNγ upon peptide restimulation versus no restimulation controls with irradiated splenocytes only.
BQ	15mer IFNγ Difference in Preliminary Average Vaccine Groups over Naïve	Average of vaccine group increase in IFNγ upon peptide restimulation versus no restimulation controls with irradiated splenocytes only versus naive.
Tab 4: TMT Mass Spectrometry. Quantitative mass spectrometry used to profile 4T1 cells and vaccine.
Column	Header	Description
A	Rank	Rank based on Column O value
B	Accession	UniProt Swiss-Prot accession
C	Description	UniProt Swiss-Prot description
D	# Unique Peptides	Number of unique peptides (from Proteome Discoverer 1.4)
E	# Peptides	Number of peptides (from Proteome Discoverer 1.4)
F	# All PSMs	Number of peptide to spectrum matches (from Proteome Discoverer 1.4)
G	# Used PSMs	Number of PSMs that were usable in quantitation (unique matches, within deltamass tolerances, and passing minimum intensity test)
H	TotInt 127_C	Total protein sum of PSM reporter ion peak heights from PD 1.4 for respective channel
I	TotInt 128_N	Total protein sum of PSM reporter ion peak heights from PD 1.4 for respective channel
J	TotInt 128_C	Total protein sum of PSM reporter ion peak heights from PD 1.4 for respective channel
K	TotInt 130_N	Total protein sum of PSM reporter ion peak heights from PD 1.4 for respective channel
L	TotInt 129_C	Total protein sum of PSM reporter ion peak heights from PD 1.4 for respective channel
M	TotInt 131	Total protein sum of PSM reporter ion peak heights from PD 1.4 for respective channel
N	Filter	Used to identify contaminants
O	Ranker	Average reporter ion intensity per channel (used to move non-quantifiable proteins to bottom of sheet)
P	Norm Lot B 4T1 Whole Cell	Grand total normalized total protein intensities (assumes equal protein loading) for indicated sample
Q	Norm Lot B 4T1 Vaccine	Grand total normalized total protein intensities (assumes equal protein loading) for indicated sample
R	Norm Lot C 4T1 Whole Cell	Grand total normalized total protein intensities (assumes equal protein loading) for indicated sample
S	Norm Lot C 4T1 Vaccine	Grand total normalized total protein intensities (assumes equal protein loading) for indicated sample
T	Norm Lot D 4T1 Whole Cell	Grand total normalized total protein intensities (assumes equal protein loading) for indicated sample
U	Norm Lot D 4T1 Vaccine	Grand total normalized total protein intensities (assumes equal protein loading) for indicated sample
V	Ave 4T1 Whole Cells	Average of whole cell samples
W	Ave 4T1 Vaccine	Average of 4T1 autophagosome-enriched vaccine samples
X	FC	Fold change (traditional definition)
Y	logFC	Log, base 2, of fold-change (from edgeR)
Z	PValue	Uncorrected statistical test p-value (from edgeR)
AA	FDR	Benjamini-Hochberg corrected p-values (a false discovery rate)
AB	PassTest	Text column to indicate if FDR is less than a specified value
AC	Candidate	Text column to indicate DE candidate status (no > 0.1 > low > 0.05 > med > 0.01 > high)
AD	Index	Swiss-Prot accessions used for annotations (should match column B)
AE	Primary Protein Name	UniProt Swiss-Prot primary protein name
AF	Alternative Protein Names	Any other alternative protein names
AG	Identifier	Swiss-Prot identifier
AH	Accession	Swiss-Prot accession
AI	Other Accessions	Any other Swiss-Prot accessions
AJ	UniProt Gene Name	UniProt gene names
AK	Other Gene Synonyms	Any other gene symbols
AL	Species Name	Latin species name
AM	Taxonomy Number	NCBI taxonomy number
AN	UniProt Link	Link to Swiss-Prot entry
AO	MGI Accession	Mouse Genome Informatics accession
AP	MGI Gene Name	MGI gene name
AQ	MGI Link	Link to MGI entry
AR	Tested on IgG Array	True if tested on IgG Array (Tab 2)
AS	Confirmed Mutation	True if mutated in 4T1 (Tab 1)
AT	Key Words	UniProt Swiss-Prot Key Words

## Sheet: 1 4T1 Exome Overlap
4T1 Exome Overlap
## ENSEMBL VARIANT EFFECT PREDICTOR format (UCSC Variant Annotation Integrator)
## Output produced at 2014-06-06 11:07:43
## Connected to UCSC database mm10
## Variants: Filtered 4T1 (../trash/ct/ct_genome_565f_e4c00.vcf)
## Transcripts: RefSeq Genes (mm10.refGene)
## dbSNP: Simple Nucleotide Polymorphisms (dbSNP 138) (mm10.snp138)
## alignment to Castle et al; match at 'Gene' and 'All RefSeq Transcript Coordinates of Neoepitope-site' (Mutated tumor alleles are expressed according to their DNA frequency)
## alignment to Kim et al, match at 'Gene' and 'All RefSeq Transcript Coordinates of Neoepitope-site' (Eradication of metastatic mouse cancers resistant to immune checkpoint blockade by suppression of myeloid-derived cells)
Variation	Location	Gene	Zygosity	Consequence	Mutation Site in Transcript used for Peptide Array	Selected for IgG Peptide Array	Parent Protein LC-MS/MS Confirmed?	Feature	All RefSeq Transcript Coordinates of Neoepitope-site	MATCH Castle et al.	MATCH Kim et al.
chr15_76950302_G/A	chr15:76950302	1110038F14Rik	Heterozygous	missense variant	G133R		TRUE	NM_054099	G195R G133R G132R	TRUE
chr11_9522393_A/T	chr11:9522393	Abca13	Heterozygous	missense variant	Q4266H	TRUE		NM_178259	Q4266H	TRUE
chr14_118500057_A/T	chr14:118500057	Abcc4	Heterozygous	missense variant	I1140K	TRUE		NM_001163676	I1140K I1215K I1172K	TRUE
chr13_12310884_G/C	chr13:12310884	Actn2	Heterozygous	missense variant	N68K	TRUE		NM_033268	N68K N68K	TRUE
chr8_40681682_G/C	chr8:40681682	Adam24	Heterozygous	missense variant	A730P	TRUE		NM_010086	A730P	TRUE
chr3_69575127_T/A	chr3:69575127	B3galnt1	Heterozygous	missense variant	D267V	TRUE		NM_020026	D267V	TRUE
chr10_70958845_T/C	chr10:70958845	Bicc1	Heterozygous	missense variant	M161V			NM_031397	M79V M161V M161V	TRUE
chr14_46385937_G/A	chr14:46385937	Bmp4	Heterozygous	missense variant	H51Y	TRUE		NM_007554	H51Y H51Y	TRUE	TRUE
chr1_189657653_G/C	chr1:189657653	Cenpf	Heterozygous	missense variant	D1327E			NM_001081363	D1310E D1327E	TRUE
chr18_53740056_G/T	chr18:53740056	Cep120	Heterozygous	missense variant	H68N	TRUE		NM_178686	H68N H68N	TRUE
chr7_73453166_T/C	chr7:73453166	Chd2	Heterozygous	missense variant	D1357G	TRUE		NM_001081345	D1357G	TRUE
chr9_55034889_G/T	chr9:55034889	Chrnb4	Heterozygous	missense variant	T367N			NM_148944	T186N T367N	TRUE
chr2_130391295_G/T	chr2:130391295	Cpxm1	Heterozygous	missense variant	L625I	TRUE		NM_019696	L625I	TRUE
chr14_56100739_C/G	chr14:56100739	Ctsg	Heterozygous	missense variant	S133T	TRUE		NM_007800	S133T	TRUE	TRUE
chr19_37699977_C/A	chr19:37699977	Cyp26a1	Heterozygous	missense variant	L316I	TRUE		NM_007811	L316I	TRUE
chr19_39513299_A/G	chr19:39513299	Cyp2c39	Heterozygous	missense variant	S99G	TRUE		NM_010003	S99G	TRUE
chr17_56191057_C/T	chr17:56191057	Dpp9	Heterozygous	missense variant	G633E	TRUE	TRUE	NM_172624	G633E	TRUE
chr17_26508254_A/G	chr17:26508254	Dusp1	Heterozygous	missense variant	C24R	TRUE	TRUE	NM_013642	C24R	TRUE
chr4_41638815_G/T	chr4:41638815	Enho	Heterozygous	missense variant	L10I	TRUE		NM_027147	L10I	TRUE
chr14_7889150_T/A	chr14:7889150	Flnb	Heterozygous	missense variant	L500Q	TRUE	TRUE	NM_134080	L500Q	TRUE
chr1_162888810_G/C	chr1:162888810	Fmo2	Heterozygous	missense variant	F69L	TRUE		NM_018881	F69L F69L F69L	TRUE
chr2_155504715_A/T	chr2:155504715	Ggt7	Heterozygous	missense variant	W222R	TRUE		NM_144786	W222R W222R	TRUE
chr1_118837480_A/C	chr1:118837480	Gli2	Heterozygous	missense variant	N980K	TRUE	TRUE	NM_001081125	N980K	TRUE
chr15_103563434_G/A	chr15:103563434	Glycam1	Heterozygous	missense variant	T45I	TRUE		NM_001289587	T45I T43I	TRUE
chr14_56233986_G/A	chr14:56233986	Gzmc	Heterozygous	missense variant	P33S	TRUE		NM_010371	P33S	TRUE
chr4_123189044_C/T	chr4:123189044	Hpcal4	Heterozygous	missense variant	A61V	TRUE		NM_174998	A61V	TRUE
chr1_91387260_A/C	chr1:91387260	Ilkap	Heterozygous	missense variant	I127S	TRUE	TRUE	NM_023343	I7S I127S I7S I7S	TRUE
chr18_58671634_G/T	chr18:58671634	Isoc1	Heterozygous	missense variant	V205L	TRUE		NM_025478	V205L	TRUE
chr19_47898131_G/C	chr19:47898131	Itprip	Heterozygous	missense variant	A15G	TRUE	TRUE	NM_001001738	A15G A15G	TRUE	TRUE
chr8_15027411_C/A	chr8:15027411	Kbtbd11	Heterozygous	missense variant	N3K			NM_029116	N3K	TRUE
chr6_56781865_G/C	chr6:56781865	Kbtbd2	Heterozygous	missense variant	T91R	TRUE		NM_145958	T91R T91R	TRUE
chr11_91576096_C/G	chr11:91576096	Kif2b	Heterozygous	missense variant	G454R	TRUE		NM_028547	G454R	TRUE
chr17_67799129_G/A	chr17:67799129	Lama1	Heterozygous	missense variant	V2120M			NM_008480	V2120M	TRUE
chr1_155724947_C/A	chr1:155724947	Lhx4	Heterozygous	missense variant	A31S	TRUE		NM_010712	A31S	TRUE
chr17_84705982_A/T	chr17:84705982	Lrpprc	Heterozygous	missense variant	L1347M	TRUE	TRUE	NM_028233	L1347M	TRUE	TRUE
chr13_13637553_C/T	chr13:13637553	Lyst	Heterozygous	missense variant	S850F	TRUE		NM_010748	S850F S850F	TRUE
chr5_36824144_C/T	chr5:36824144	Man2b2	Heterozygous	missense variant	V210I	TRUE		NM_008550	V210I	TRUE
chr2_172249500_C/G	chr2:172249500	Mc3r	Heterozygous	missense variant	A214G	TRUE		NM_008561	A214G	TRUE	TRUE
chr7_145321475_T/A	chr7:145321475	Mrgprd	Heterozygous	missense variant	S28T	TRUE		NM_203490	S28T	TRUE
chr11_58176163_C/T	chr11:58176163	Mrpl22	Heterozygous	missense variant	A98V	TRUE	TRUE	NM_175001	A98V	TRUE
chr7_44623160_C/G	chr7:44623160	Myh14	Heterozygous	missense variant	R1415P	TRUE	TRUE	NM_001271540	R1415P R1448P R1407P	TRUE	TRUE
chr15_25781452_C/T	chr15:25781452	Myo10	Heterozygous	missense variant	S1011L		TRUE	NM_019472	S265L S1011L	TRUE
chr7_107182062_C/G	chr7:107182062	Nlrp14	Heterozygous	missense variant	S155R	TRUE		NM_001002894	S155R	TRUE
chr7_23320969_A/G	chr7:23320969	Nlrp4e	Heterozygous	missense variant	N294D			NM_001004194	N294D	TRUE
chr2_86374491_T/C	chr2:86374491	Olfr1057	Heterozygous	missense variant	N307S	TRUE		NM_207563	N307S	TRUE
chr2_89014004_T/C	chr2:89014004	Olfr1216	Heterozygous	missense variant	K20R	TRUE		NM_146893	K20R	TRUE
chr2_111292891_A/G	chr2:111292891	Olfr1278	Heterozygous	missense variant	M208V	TRUE		NM_146394	M208V	TRUE
chr2_36793673_A/G	chr2:36793673	Olfr50	Heterozygous	missense variant	M146V	TRUE		NM_146946	M146V	TRUE
chr7_103598185_G/A	chr7:103598185	Olfr618	Heterozygous	missense variant	A290T	TRUE		NM_147047	A290T	TRUE
chr7_103979370_G/C	chr7:103979370	Olfr635	Heterozygous	missense variant	Q65H	TRUE		NM_147118	Q65H	TRUE
chr9_19921108_G/T	chr9:19921108	Olfr77	Heterozygous	missense variant	A300S	TRUE		NM_146339	A300S	TRUE	TRUE
chr9_19883823_A/C	chr9:19883823	Olfr862	Heterozygous	missense variant	F161V	TRUE		NM_146562	F161V	TRUE
chr9_37992795_G/A	chr9:37992795	Olfr881	Heterozygous	missense variant	C101Y	TRUE		NM_146418	C101Y	TRUE	TRUE
chr9_39078618_G/T	chr9:39078618	Olfr938	Heterozygous	missense variant	N42K	TRUE		NM_146438	N42K	TRUE
chr9_40001002_G/T	chr9:40001002	Olfr979	Heterozygous	missense variant	T75K	TRUE		NM_147108	T75K	TRUE	TRUE
chr8_61709018_C/G	chr8:61709018	Palld	Heterozygous	missense variant	G444A		TRUE	NM_001081390	G55A G444A G444A G55A	TRUE	TRUE
chr11_69740416_C/T	chr11:69740416	Polr2a	Heterozygous	missense variant	M1102I	TRUE	TRUE	NM_001291068	M1102I M1102I	TRUE	TRUE
chr9_108513956_G/T	chr9:108513956	Qars	Heterozygous	missense variant	E530D	TRUE		NM_133794	E530D E361D E530D	TRUE	TRUE
chr5_128771720_A/C	chr5:128771720	Rimbp2	Heterozygous	missense variant	S996A			NM_001081388	S921A S989A S989A S996A	TRUE
chr6_23648935_G/C	chr6:23648935	Rnf133	Heterozygous	missense variant	P332A			NM_198251	P332A	TRUE	TRUE
chr6_54534489_A/C	chr6:54534489	Scrn1	Heterozygous	missense variant	C89G	TRUE	TRUE	NM_027268	C89G	TRUE	TRUE
chr1_157538254_C/A	chr1:157538254	Sec16b	Heterozygous	missense variant	L418I			NM_033354	L103I L418I L418I L418I	TRUE	TRUE
chr12_103980367_G/A	chr12:103980367	Serpina11	Heterozygous	missense variant	A425V			NM_199314	A423V A425V	TRUE
chr1_83022740_G/T	chr1:83022740	Slc19a3	Heterozygous	missense variant	F185L	TRUE		NM_030556	F185L F185L	TRUE	TRUE
chr8_92990127_T/A	chr8:92990127	Slc6a2	Heterozygous	missense variant	V307E	TRUE		NM_009209	V307E V307E	TRUE
chr12_36317162_C/G	chr12:36317162	Sostdc1	Heterozygous	missense variant	N112K	TRUE		NM_025312	N112K	TRUE
chr6_24796482_T/G	chr6:24796482	Spam1	Heterozygous	missense variant	I144S	TRUE		NM_001079875	I144S I144S I144S	TRUE
chr18_64269828_A/C	chr18:64269828	St8sia3	Heterozygous	missense variant	L235F	TRUE		NM_009182	L235F	TRUE
chr5_151045164_C/G	chr5:151045164	Stard13	Heterozygous	missense variant	Q1017H			NM_001163493	Q1017H Q998H	TRUE
chr7_13796427_T/A	chr7:13796427	Sult2a1	Heterozygous	missense variant	Q262H	TRUE		NM_001111296	Q262H	TRUE
chr6_42040102_A/C	chr6:42040102	Sva	Heterozygous	missense variant	T41P	TRUE		NM_009299	T41P	TRUE	TRUE
chr18_14821550_C/A	chr18:14821550	Taf4b	Heterozygous	missense variant	P561H	TRUE		NM_001100449	P561H	TRUE
chr10_80417365_C/T	chr10:80417365	Tcf3	Heterozygous	missense variant	S255N	TRUE		NM_001164147	S255N S254N S254N S254N S255N S255N S255N S254N	TRUE	TRUE
chr10_105413270_C/T	chr10:105413270	Tmtc2	Heterozygous	missense variant	V201I	TRUE		NM_177368	V201I V201I	TRUE
chr11_67879946_G/A	chr11:67879946	Usp43	Heterozygous	missense variant	R621W	TRUE		NM_001291049	R621W R621W	TRUE	TRUE
chr17_35013310_G/A	chr17:35013310	Vars	Heterozygous	missense variant	G821S	TRUE	TRUE	NM_011690	G821S G821S	TRUE
chr6_57071318_T/A	chr6:57071318	Vmn1r9	Heterozygous	missense variant	V126D	TRUE		NM_134185	V126D	TRUE
chr18_31827321_C/T	chr18:31827321	Wdr33	Heterozygous	missense variant	H13Y	TRUE	TRUE	NM_028866	H13Y H13Y H13Y H13Y H13Y	TRUE
chr5_117371119_A/G	chr5:117371119	Wsb2	Heterozygous	missense variant	Q153R			NM_021539	Q155R Q153R	TRUE	TRUE
chr15_12150180_A/C	chr15:12150180	Zfr	Heterozygous	missense variant	K411T	TRUE	TRUE	NM_011767	K411T	TRUE
chr4_119422922_C/T	chr4:119422922	Zmynd12	Heterozygous	missense variant	R13C	TRUE		NM_001014900	R13C	TRUE

## Sheet: 2 Preliminary IgG Peptide Array
Preliminary IgG Peptide Array
Gene	Neoepitope-site Coordinate	Neoepitope-site Version (SNV/WT)	Peptide Array Printed Sequence Length	LC-MS/MS Confirmed Parent Protein?	Independently Confirmed Neoepitope-Site by Whole Exome Sequencing	Krieter et al. 2015 "Immunogenic 4T1 Mutations"	Krieter et al. 2015 "Immunogenic 4T1 Mutations" Reactive Subtype	Peptide Array Printed Up to 15mer Sequence	Selected for Cellular Splenocyte Assays?	TOP PEPTIDE MHCI H2-Kd,Dd,Ld 1-log50k Windowed 9-11mers NetMHC Pan v2.8	TOP PEPTIDE LENGTH MHCI H2-Kd,Dd,Ld 1-log50k Windowed 9-11mers NetMHC Pan v2.8	TOP SCORE ISOFORM MHCI H2-Kd,Dd,Ld 1-log50k Windowed 9-11mers NetMHC Pan v2.8	TOP SCORE MHCI H2-Kd,Dd,Ld 1-log50k Windowed 9-11mers NetMHC Pan v2.8	TOP PEPTIDE MHCII H2-IAd 1-log50k Windowed 15mers NetMHCII v2.2	TOP SCORE MHCII H2-IAd 1-log50k Windowed 15mers NetMHCII v2.2	R4 Naïve Normalized IgG Signal Intensity	R5 Naïve Normalized IgG Signal Intensity	R4 R5 Average Naïve Normalized IgG Signal Intensity	R1 poly-I:C Only Normalized IgG Signal Intensity	R3 poly-I:C Only Normalized IgG Signal Intensity	R4 poly-I:C Only Normalized IgG Signal Intensity	R5 poly-I:C Only Normalized IgG Signal Intensity	R1 4T1 Vaccine + poly-I:C Normalized IgG Signal Intensity	R3 4T1 Vaccine + poly-I:C Normalized IgG Signal Intensity	R4 4T1 Vaccine + poly-I:C Normalized IgG Signal Intensity	R5 4T1 Vaccine + poly-I:C Normalized IgG Signal Intensity	R1 R3 R4 R5 Average 4T1 Vaccine + poly-I:C Normalized IgG Signal Intensity	R1 Difference 4T1 Vaccine + poly-I:C versus poly-I:C only Normalized IgG Signal Intensity	R3 Difference 4T1 Vaccine + poly-I:C versus poly-I:C only Normalized IgG Signal Intensity	R4 Difference 4T1 Vaccine + poly-I:C versus poly-I:C only Normalized IgG Signal Intensity	R5 Difference 4T1 Vaccine + poly-I:C versus poly-I:C only Normalized IgG Signal Intensity	R1 R3 R4 R5 Average Difference 4T1 Vaccine + poly-I:C versus poly-I:C only Normalized IgG Signal Intensity
AH1	gp70 423-431	AH1	9	N/A	N/A			SPSYVYHQF	TRUE	SPSYVYHQF	9	H2-Ld	0.5344	SPSYVYHQF	0.022	3284.5	7500.42	5392.46	7500.42	9103.55	6618.57	6618.57	9103.55	10665.1	9763.93	7500.42	9258.25	1603.13	1561.52	3145.36	881.853	1797.97
Wdr33	H13Y	SNP	15	TRUE	TRUE			GSPPRFFYMPRFQHQ	TRUE	SPPRFFYM	8	H2-Ld	0.5497	SPPRFFYMPRFQHQA	0.1919	15142.2	9763.93	12453	10665.1	12269.8	11475.3	11475.3	9763.93	11475.3	10665.1	13158.7	11265.7	-901.146	-794.458	-810.246	1683.33	-205.629
Wdr33	H13Y	WT	15	TRUE	TRUE			GSPPRFFHMPRFQHQ	TRUE	SPPRFFHM	8	H2-Ld	0.4778	SPPRFFHMPRFQHQA	0.1797	13992.2	10665.1	12328.7	17866.8	17866.8	9763.93	12269.8	15142.2	17866.8	9103.55	17866.8	14994.8	-2724.63	0	-660.377	5597.02	553.002
Gli2	N980K	SNP	15	TRUE	TRUE			FHSTHNMKPGSLPPC		STHNMKPGSL	10	H2-Kd	0.1996	HSTHNMKPGSLPPCA	0.3017	3910.38	4289.52	4099.95	2762.79	4289.52	4289.52	2966.61	5456.72	2595.95	3167.18	3129.31	3587.29	2693.93	-1693.57	-1122.34	162.698	10.1789
Gli2	N980K	WT	15	TRUE	TRUE			FHSTHNMNPGSLPPC		THNMNPGSL	9	H2-Kd	0.2925	HSTHNMNPGSLPPCA	0.2113	5785.38	6618.57	6201.98	5456.72	6201.13	8308.3	5456.72	7500.42	3314.02	7500.42	4842.99	5789.46	2043.7	-2887.1	-807.875	-613.731	-566.252
Dpp9	G633E	SNP	15	TRUE	TRUE			KPHTLQPERKHPTVL	TRUE	QPERKHPTVLF	11	H2-Ld	0.2465	QPERKHPTVLFVYGG	0.2338	5456.72	4751.81	5104.26	5257.06	5257.06	5456.72	3492.51	4842.99	2571.99	4369.55	6618.57	4600.77	-414.068	-2685.07	-1087.17	3126.06	-265.063
Dpp9	G633E	WT	15	TRUE	TRUE			KPHTLQPGRKHPTVL	TRUE	QPGRKHPTVLF	11	H2-Ld	0.2844	YKPHTLQPGRKHPTV	0.2278	4289.52	3675.23	3982.38	2908.75	3395.5	2527.27	1834.24	3545.04	1834.24	2749.94	4369.55	3124.69	636.298	-1561.26	222.674	2535.31	458.254
Dusp1	C24R	SNP	15	TRUE	TRUE			LREGAAQRLLLDCRS		RLLLDCRSFF	10	H2-Kd	0.2344	GGLRALLREGAAQRL	0.4493	9763.93	2762.79	6263.36	4842.99	3910.38	3167.18	4289.52	2675.06	5257.06	1911.79	3167.18	3252.77	-2167.92	1346.68	-1255.39	-1122.34	-799.745
Dusp1	C24R	WT	15	TRUE	TRUE			LREGAAQCLLLDCRS		CLLLDCRSFF	10	H2-Kd	0.1582	GGLRALLREGAAQCL	0.3418	2101.23	1873.36	1987.3	1709.75	2006.65	1766.31	2854.85	1527.87	2824.24	1573.3	1986.37	1977.95	-181.874	817.594	-193.01	-868.478	-106.442
Itprip	A15G	SNP	15	TRUE	TRUE			VCLVVVTGIINHPLL		TGIINHPLL	9	H2-Dd	0.3824	MELFRVCLVVVTGII	0.2689	2762.79	4369.55	3566.17	5785.38	4002.92	5016.46	4002.92	5016.46	3743.11	5257.06	5016.46	4758.27	-768.923	-259.812	240.598	1013.54	56.3514
Itprip	A15G	WT	15	TRUE	TRUE			VCLVVVTAIINHPLL		TAIINHPL	8	H2-Ld	0.2802	MAMELFRVCLVVVTA	0.3038	2824.24	5456.72	4140.48	6201.13	4440.43	3910.38	5785.38	5257.06	3395.5	5785.38	4751.81	4797.44	-944.068	-1044.93	1875.01	-1033.58	-286.893
Polr2a	M1102I	SNP	15	TRUE	TRUE	TRUE	CD4	LGEPATQITLNTFHY	TRUE	TQITLNTF	8	H2-Kd	0.273	GEPATQITLNTFHYA	0.278	3314.02	3545.04	3429.53	1850.66	1647.41	3314.02	2762.79	2737.16	2231.21	4289.52	4558.93	3454.2	886.5	583.794	975.502	1796.14	1060.48
Polr2a	M1102I	WT	15	TRUE	TRUE	TRUE	CD4	LGEPATQMTLNTFHY	TRUE	TQMTLNTF	8	H2-Kd	0.3557	GEPATQMTLNTFHYA	0.355	2494.47	3314.02	2904.24	3212.74	3545.04	2620.29	6201.13	4751.81	3675.23	4558.93	3910.38	4224.09	1539.07	130.185	1938.64	-2290.75	329.287
Vars	G821S	SNP	15	TRUE	TRUE			PGTLLETSHDILFFW		TSHDILFF	8	H2-Dd	0.1751	SHDILFFWVARMVML	0.1233	2553.47	2494.47	2523.97	2595.95	1994.94	2854.85	1925.96	2620.29	2431.75	3743.11	2494.47	2822.4	24.3367	436.804	888.255	568.506	479.475
Vars	G821S	WT	15	TRUE	TRUE			PGTLLETGHDILFFW		TGHDILFF	8	H2-Dd	0.2008	GHDILFFWVARMVML	0.1231	2661.25	2527.27	2594.26	2675.06	2343.78	2639.03	1582.33	2392.45	2620.29	3910.38	2326.84	2812.49	-282.616	276.511	1271.35	744.502	502.436
Wdr11	T340I	SNP	15	TRUE		TRUE	CD8	LDPVQELIYDLRSQC	TRUE	IYDLRSQCDAI	11	H2-Kd	0.3683	IYDLRSQCDAIRVTK	0.3029	2423.29	3284.5	2853.9	3048.19	2705.6	3815.39	3129.31	4195.63	2527.27	2929.12	2595.95	3061.99	1147.44	-178.333	-886.265	-533.352	-112.629
Wdr11	T340I	WT	15	TRUE		TRUE	CD8	LDPVQELTYDLRSQC	TRUE	TYDLRSQCDAI	11	H2-Kd	0.34	TYDLRSQCDAIRVTK	0.3035	1994.94	2343.78	2169.36	2966.61	2595.95	1796.99	3284.5	2966.61	2675.06	1814.02	2811.34	2566.76	0	79.1094	17.024	-473.166	-94.2581
Lrpprc	L1347M	SNP	15	TRUE	TRUE			EYLTAKNMKLDDLFL	TRUE	EYLTAKNMKL	10	H2-Kd	0.291	AKNMKLDDLFLKRYA	0.3541	1405.19	2620.29	2012.74	1301.1	1391.76	1925.96	1065.19	2204.62	816.725	3129.31	1405.19	1888.96	903.521	-575.037	1203.35	340.009	467.96
Lrpprc	L1347M	WT	15	TRUE	TRUE			EYLTAKNLKLDDLFL	TRUE	LYEYLTAKNL	10	H2-Kd	0.3438	AKNLKLDDLFLKRYA	0.3059	2929.12	2929.12	2929.12	2262.24	1867.35	2966.61	2359.02	2326.84	1885.86	4002.92	2786.07	2750.42	64.5906	18.5119	1036.31	427.051	386.615
Myh14	R1415P	SNP	15	TRUE	TRUE			LEAGEEAPRRAAREA		APRRAAREA	9	H2-Ld	0.0853	PRRAAREAETLTQRL	0.3252	1619.89	1478.42	1549.15	1873.36	1464.47	1195.97	2175.55	1545.05	1607.47	1278.31	1573.3	1501.03	-328.317	143.001	82.3396	-602.246	-176.306
Myh14	R1415P	WT	15	TRUE	TRUE			LEAGEEARRRAAREA		RRRAAREAETL	11	H2-Kd	0.188	ARRRAAREAETLTQR	0.3711	4195.63	2278.6	3237.12	2053.82	2196.42	1236.26	3675.23	1873.36	1850.66	1527.87	2908.75	2040.16	-180.455	-345.761	291.612	-766.483	-250.272
Flnb	L500Q	SNP	15	TRUE	TRUE			GPKGLEEQVKQKGFL		KGPKGLEEQV	10	H2-Kd	0.1496	EEQVKQKGFLDGVYS	0.1856	1516.61	2326.84	1921.72	1437.68	1668.18	1994.94	2087.95	2015.17	1357.12	2162.29	1422.15	1739.18	577.493	-311.057	167.347	-665.799	-58.0037
Flnb	L500Q	WT	15	TRUE	TRUE			GPKGLEELVKQKGFL		KGPKGLEEL	9	H2-Kd	0.2389	KGPKGLEELVKQKGF	0.1889	1986.37	3017.68	2502.03	2312.59	2854.85	3048.19	1911.79	2824.24	1140.49	3492.51	2204.62	2415.47	511.645	-1714.36	444.319	292.836	-116.389
Scrn1	C89G	SNP	15	TRUE	TRUE			GANEHGVGIANEAIN		VGIANEAI	8	H2-Kd	0.3455	ANEHGVGIANEAINA	0.1844	1357.12	1177.64	1267.38	1633.77	1754.73	905.076	2343.78	1819.37	1873.36	1010.18	1959.36	1665.57	185.606	118.633	105.105	-384.422	6.23053
Scrn1	C89G	WT	15	TRUE	TRUE			GANEHGVCIANEAIN		VCIANEAI	8	H2-Kd	0.2374	ANEHGVCIANEAINA	0.1693	3545.04	2204.62	2874.83	2231.21	1220.14	2908.75	2440.23	1236.26	1278.31	2811.34	2661.25	1996.79	-994.947	58.1709	-97.409	221.016	-203.292
Gen1	K707N	SNP	15	TRUE		TRUE	CD4	RVAVKTTNNLVMKNS	TRUE	RVAVKTTNNL	10	H2-Kd	0.2096	TNNLVMKNSVCLERD	0.3403	3623.53	2217.35	2920.44	2302.13	1834.24	2786.07	2006.65	1464.47	1717.02	2661.25	2440.23	2070.74	-837.656	-117.213	-124.824	433.583	-161.528
Gen1	K707N	WT	15	TRUE		TRUE	CD4	RVAVKTTKNLVMKNS	TRUE	KNLVMKNSVCL	11	H2-Kd	0.194	TKNLVMKNSVCLERD	0.369	1123.51	1065.19	1094.35	1205	2053.82	1090.26	1123.51	905.076	1684.43	985.407	905.076	1120	-299.923	-369.387	-104.857	-218.43	-248.149
Ilkap	I127S	SNP	15	TRUE	TRUE	TRUE	CD4	EMQDAHVSLNDITQE	TRUE	AHVSLNDI	8	H2-Kd	0.3024	REEMQDAHVSLNDIT	0.2773	1573.3	1357.12	1465.21	2112.52	2015.17	1538.24	1391.76	1593.72	1949.38	1375.32	1449.65	1592.02	-518.798	-65.791	-162.919	57.888	-172.405
Ilkap	I127S	WT	15	TRUE	TRUE	TRUE	CD4	EMQDAHVILNDITQE	TRUE	AHVILNDI	8	H2-Kd	0.2461	REEMQDAHVILNDIT	0.2188	2392.45	1551.88	1972.17	1737.77	1268.74	2312.59	1861.35	1808.67	1494.15	2231.21	1647.41	1795.36	70.9088	225.412	-81.3879	-213.937	0.248752
Zfr	K411T	SNP	15	TRUE	TRUE	TRUE	CD4	AKHQKVVTLHTKLGK	TRUE	KHQKVVTL	8	H2-Kd	0.3877	IRGAKHQKVVTLHTK	0.3615	1090.26	2153.93	1622.1	985.407	1717.02	1640.58	776.395	985.407	869.732	1335.89	1345.92	1134.24	0	-847.293	-304.685	569.528	-145.613
Zfr	K411T	WT	15	TRUE	TRUE	TRUE	CD4	AKHQKVVKLHTKLGK	TRUE	KHQKVVKL	8	H2-Kd	0.288	RGAKHQKVVKLHTKL	0.3751	1289.69	2196.42	1743.05	2571.99	2675.06	1640.58	756.368	2087.95	2175.55	1422.15	2006.65	1923.07	-484.045	-499.515	-218.428	1250.28	12.0723
Mrpl22	A98V	SNP	15	TRUE	TRUE			MSIDQALVQLEFNDK		RGMSIDQALV	10	H2-Kd	0.2389	AKMIRGMSIDQALVQ	0.3311	1975.26	1850.66	1912.96	2494.47	2032.9	1834.24	2824.24	2217.35	2015.17	1754.73	2376.47	2090.93	-277.116	-17.7266	-79.5076	-447.77	-205.53
Mrpl22	A98V	WT	15	TRUE	TRUE			MSIDQALAQLEFNDK		QALAQLEF	8	H2-Ld	0.186	AKMIRGMSIDQALAQ	0.3494	1437.68	1268.74	1353.21	2335.29	1694.18	1808.67	2196.42	1994.94	1925.96	1177.64	1975.26	1768.45	-340.351	231.783	-631.032	-221.158	-240.19
Gprc5a	F119L	SNP	15	TRUE		TRUE	CD8	SCLLAHALNLIKLVR		CFSCLLAHAL	10	H2-Kd	0.3258	LLAHALNLIKLVRGR	0.3264	1505.63	1564.8	1535.21	1319.29	2929.12	2343.78	1659.35	2494.47	2343.78	1619.89	1464.47	1980.65	1175.18	-585.343	-723.895	-194.881	-82.2357
Gprc5a	F119L	WT	15	TRUE		TRUE	CD8	SCLLAHAFNLIKLVR		CLLAHAFNLI	10	H2-Kd	0.2705	AHAFNLIKLVRGRKP	0.2618	1449.65	1582.33	1515.99	1335.89	2376.47	1694.18	1527.87	1301.1	2694.36	1684.43	1505.63	1796.38	-34.7878	317.892	-9.74758	-22.2429	62.7785
Sostdc1	N112K	SNP	15		TRUE			LPLPVLPKWIGGGYG		LPLPVLPKWI	10	H2-Ld	0.2939	VCAGECLPLPVLPKW	0.3649	9103.55	13992.2	11547.9	13158.7	13992.2	13158.7	17866.8	13158.7	13992.2	12269.8	15142.2	13640.7	0	0	-888.874	-2724.63	-903.376
Sostdc1	N112K	WT	15		TRUE			LPLPVLPNWIGGGYG		LPLPVLPNWI	10	H2-Ld	0.3539	VCAGECLPLPVLPNW	0.3264	10665.1	13158.7	11911.9	12269.8	10665.1	10665.1	15142.2	12269.8	13158.7	13992.2	9763.93	12296.2	0	2493.58	3327.17	-5378.23	110.628
Hpcal4	A61V	SNP	15		TRUE			KFFPYGDVSKFAQHA		FPYGDVSKF	9	H2-Ld	0.3655	EFQQLYIKFFPYGDV	0.1833	12269.8	17866.8	15068.3	13992.2	13158.7	15142.2	13158.7	10665.1	9763.93	17866.8	13992.2	13072	-3327.17	-3394.72	2724.63	833.59	-790.918
Hpcal4	A61V	WT	15		TRUE			KFFPYGDASKFAQHA		FPYGDASKF	9	H2-Ld	0.3489	EFQQLYIKFFPYGDA	0.1963	5257.06	11475.3	8366.19	9763.93	8308.3	9103.55	13992.2	6201.13	3492.51	11475.3	10665.1	7958.51	-3562.81	-4815.79	2371.77	-3327.17	-2333.5
Qars	E530D	SNP	15		TRUE			RRRGFPPDAINNFCA	TRUE	RGFPPDAI	8	H2-Kd	0.2819	DAINNFCARVGVTVA	0.3228	17866.8	8308.3	13087.5	9103.55	9763.93	7500.42	9763.93	6618.57	4751.81	6201.13	11475.3	7261.71	-2484.98	-5012.12	-1299.3	1711.39	-1771.25
Qars	E530D	WT	15		TRUE			RRRGFPPEAINNFCA	TRUE	FPPEAINNF	9	H2-Ld	0.3001	EAINNFCARVGVTVA	0.3257	11475.3	4558.93	8017.13	3910.38	3623.53	4195.63	4440.43	4369.55	2262.24	4440.43	6201.13	4318.34	459.168	-1361.29	244.806	1760.69	275.845
Olfr635	Q65H	SNP	15		TRUE			RTEPSLHHPMYLFLS		HPMYLFLSM	9	H2-Ld	0.696	SLHHPMYLFLSMLAL	0.3216	5016.46	5257.06	5136.76	4369.55	6618.57	4751.81	8308.3	3395.5	6618.57	6618.57	5456.72	5522.34	-974.045	0	1866.76	-2851.58	-489.715
Olfr635	Q65H	WT	15		TRUE			RTEPSLHQPMYLFLS		QPMYLFLSM	9	H2-Ld	0.6139	SLHQPMYLFLSMLAL	0.3595	2175.55	3212.74	2694.14	2877.44	4195.63	2112.52	5257.06	2786.07	6201.13	4127.42	1994.94	3777.39	-91.3704	2005.5	2014.9	-3262.11	166.729
Slc6a2	V307E	SNP	15		TRUE			YRLKEATEWIDAATQ		FYRLKEATEWI	11	H2-Kd	0.4849	EWIDAATQIFFSLGA	0.2466	8308.3	2811.34	5559.82	2087.95	2423.29	3212.74	2376.47	3076.97	1564.8	3017.68	2553.47	2553.23	989.027	-858.494	-195.058	177	28.1187
Slc6a2	V307E	WT	15		TRUE			YRLKEATVWIDAATQ		VWIDAATQI	9	H2-Kd	0.4861	FYRLKEATVWIDAAT	0.3219	2006.65	1319.29	1662.97	2359.02	2661.25	1248.47	2620.29	2908.75	2494.47	1647.41	2737.16	2446.95	549.728	-166.778	398.938	116.864	224.688
Spam1	I144S	SNP	15		TRUE			DKLGLAISDWEEWRP		LGLAISDWEEW	11	H2-Dd	0.1499	HYIPDDKLGLAISDW	0.141	3017.68	5785.38	4401.53	2278.6	3244.03	4842.99	4558.93	3439.69	2128.23	4751.81	4440.43	3690.04	1161.09	-1115.8	-91.1835	-118.498	-41.0985
Spam1	I144S	WT	15		TRUE			DKLGLAIIDWEEWRP		LGLAIIDWEEW	11	H2-Dd	0.1438	YIPDDKLGLAIIDWE	0.1714	3129.31	1994.94	2562.12	4002.92	2460.07	2583.95	2231.21	2694.36	2716.89	2312.59	3048.19	2693.01	-1308.55	256.822	-271.352	816.985	-126.525
Actn2	N68K	SNP	15		TRUE			NIEEDFRKGLKLMLL		KGLKLMLL	8	H2-Kd	0.2598	RKGLKLMLLLEVISG	0.385	2112.52	4842.99	3477.75	4440.43	4558.93	2423.29	5016.46	3743.11	3284.5	2877.44	3815.39	3430.11	-697.328	-1274.43	454.145	-1201.07	-679.67
Actn2	N68K	WT	15		TRUE			NIEEDFRNGLKLMLL		NGLKLMLL	8	H2-Dd	0.2105	NGLKLMLLLEVISGE	0.3783	2595.95	3910.38	3253.17	4127.42	3017.68	3743.11	3314.02	3284.5	2737.16	3675.23	2675.06	3092.99	-842.919	-280.522	-67.8764	-638.958	-457.569
Pzp	G1199E	SNP	15			TRUE	CD8	SLHWQRPEDVQKVKA		RPEDVQKVKAL	11	H2-Ld	0.2087	WQRPEDVQKVKALSF	0.3696	3743.11	2553.47	3148.29	2153.93	2908.75	4127.42	4369.55	3048.19	1994.94	2786.07	1925.96	2438.79	894.259	-913.804	-1341.35	-2443.58	-951.12
Pzp	G1199E	WT	15			TRUE	CD8	SLHWQRPGDVQKVKA		RPGDVQKVKAL	11	H2-Ld	0.2266	HWQRPGDVQKVKALS	0.4365	4002.92	2786.07	3394.49	1925.96	2440.23	3129.31	3545.04	1659.35	1505.63	2247.77	3492.51	2226.32	-266.608	-934.6	-881.541	-52.5327	-533.82
Bmp4	H51Y	SNP	15		TRUE			GRRSGQSYELLRDFE		SGQSYELL	8	H2-Dd	0.2777	QSYELLRDFEATLLQ	0.2132	4842.99	2877.44	3860.21	2196.42	2877.44	3492.51	2595.95	2929.12	2661.25	3545.04	3675.23	3202.66	732.707	-216.195	52.5327	1079.27	412.08
Bmp4	H51Y	WT	15		TRUE			GRRSGQSHELLRDFE		SGQSHELL	8	H2-Dd	0.2681	GQSHELLRDFEATLL	0.2307	2716.89	2376.47	2546.68	3743.11	3357.21	1582.33	3910.38	3244.03	3017.68	1633.77	4195.63	3022.78	-499.078	-339.532	51.4343	285.25	-125.481
Usp43	R621W	SNP	15		TRUE			NMAPHVAWRSTNSKA		NMAPHVAW	8	H2-Kd	0.2983	LSGLNMAPHVAWRST	0.3522	4558.93	2595.95	3577.44	1582.33	2262.24	3076.97	3815.39	1684.43	1405.19	2153.93	3623.53	2216.77	102.098	-857.051	-923.041	-191.859	-467.463
Usp43	R621W	WT	15		TRUE			NMAPHVARRSTNSKA		APHVARRST	9	H2-Ld	0.1209	PLSGLNMAPHVARRS	0.4006	3439.69	2087.95	2763.82	1345.92	2474.17	2175.55	2639.03	1391.76	1319.29	1766.31	2196.42	1668.45	45.8393	-1154.88	-409.236	-442.612	-490.222
Man2b2	V210I	SNP	15	TRUE	TRUE			QQEIFTHIMDHYSYC	TRUE	SGQQEIFTHI	10	H2-Kd	0.3491	SPSLSGQQEIFTHIM	0.2301	3492.51	5016.46	4254.49	4751.81	5785.38	4369.55	2511.28	8308.3	5016.46	5456.72	4127.42	5727.22	3556.49	-768.923	1087.17	1616.15	1372.72
Man2b2	V210I	WT	15	TRUE	TRUE			QQEIFTHVMDHYSYC	TRUE	SGQQEIFTHV	10	H2-Kd	0.2193	SPSLSGQQEIFTHVM	0.2522	2343.78	1464.47	1904.13	3492.51	3076.97	2128.23	3244.03	3675.23	3910.38	2423.29	5257.06	3816.49	182.718	833.403	295.068	2013.03	831.055
Cep120	H68N	SNP	15		TRUE	TRUE	CD4	DRKVLHQNRLQRTPI		HQNRLQRTPI	10	H2-Kd	0.3916	QNRLQRTPIKLQCFA	0.4676	4440.43	3129.31	3784.87	2786.07	3314.02	2474.17	3017.68	3815.39	2639.03	2675.06	4002.92	3283.1	1029.32	-674.993	200.891	985.239	385.114
Cep120	H68N	WT	15		TRUE	TRUE	CD4	DRKVLHQHRLQRTPI		HQHRLQRTPI	10	H2-Kd	0.3958	QHRLQRTPIKLQCFA	0.4869	1885.86	2175.55	2030.7	2929.12	3129.31	2032.9	1422.15	3017.68	1437.68	1994.94	2824.24	2318.64	88.5542	-1691.63	-37.9589	1402.09	-59.7346
Ggt7	W222R	SNP	15		TRUE			EEALQRSRDTKPGLL		RSRDTKPGLL	10	H2-Kd	0.1275	SAPGALREEALQRSR	0.3978	2571.99	1885.86	2228.93	2460.07	2231.21	2553.47	2392.45	2128.23	1936.38	2032.9	2015.17	2028.17	-331.841	-294.823	-520.568	-377.273	-381.126
Ggt7	W222R	WT	15		TRUE			EEALQRSWDTKPGLL		ALREEALQRSW	11	H2-Kd	0.1427	LREEALQRSWDTKPG	0.4062	2786.07	4195.63	3490.85	3284.5	3048.19	3357.21	3623.53	4127.42	2302.13	3815.39	3314.02	3389.74	842.919	-746.062	458.179	-309.508	61.3821
Olfr1057	N307S	SNP	15		TRUE			ALKEFLKSPCKRFNL		SPCKRFNL	8	H2-Ld	0.3889	RNKDVKCALKEFLKS	0.2159	1709.75	4002.92	2856.33	3815.39	4369.55	3284.5	1986.37	3623.53	3212.74	3244.03	3244.03	3331.08	-191.859	-1156.81	-40.4755	1257.66	-32.8721
Olfr1057	N307S	WT	15		TRUE			ALKEFLKNPCKRFNL		NPCKRFNL	8	H2-Ld	0.3401	RNKDVKCALKEFLKN	0.1857	1779.18	3623.53	2701.35	4289.52	4842.99	3439.69	1754.73	3357.21	3129.31	2854.85	3212.74	3138.53	-932.314	-1713.68	-584.843	1458.01	-443.208
Chd2	D1357G	SNP	15		TRUE			NKAPRLKGEHGLEPA		APRLKGEHGL	10	H2-Ld	0.1941	RVKKENKAPRLKGEH	0.1983	3395.5	1975.26	2685.38	1861.35	1975.26	2087.95	2326.84	2162.29	1375.32	1936.38	1949.38	1855.84	300.94	-599.939	-151.563	-377.452	-207.004
Chd2	D1357G	WT	15		TRUE			NKAPRLKDEHGLEPA		KAPRLKDEHGL	11	H2-Dd	0.1794	RVKKENKAPRLKDEH	0.1889	3675.23	2006.65	2840.94	1478.42	1505.63	2359.02	2571.99	1925.96	1065.19	1959.36	2278.6	1807.28	447.542	-440.444	-399.66	-293.388	-171.487
Sva	T41P	SNP	15		TRUE			HNEPRNYPLTLNMKI		NYPLTLNMKI	10	H2-Kd	0.4952	RNYPLTLNMKITPST	0.2455	3076.97	3492.51	3284.74	2854.85	3675.23	2824.24	4127.42	2854.85	2431.75	2511.28	4289.52	3021.85	0	-1243.48	-312.964	162.101	-348.586
Sva	T41P	WT	15		TRUE			HNEPRNYTLTLNMKI		NYTLTLNMKI	10	H2-Kd	0.5423	RNYTLTLNMKITPST	0.25	1684.43	2694.36	2189.4	1959.36	2511.28	1959.36	2278.6	1861.35	4002.92	2128.23	1551.88	2386.09	-98.0083	1491.64	168.868	-726.72	208.945
Rragd	L268P	SNP	15			TRUE	CD4	HQTSAPSPKALAHNG		HQTSAPSPKAL	11	H2-Kd	0.2153	HRSCSHQTSAPSPKA	0.3035	3357.21	3743.11	3550.16	3357.21	2990.15	2196.42	2929.12	3129.31	1593.72	2053.82	2694.36	2367.8	-227.903	-1396.43	-142.598	-234.762	-500.423
Rragd	L268P	WT	15			TRUE	CD4	HQTSAPSLKALAHNG		SHQTSAPSL	9	H2-Kd	0.3703	SCSHQTSAPSLKALA	0.3698	1633.77	2162.29	1898.03	6618.57	2217.35	2675.06	2990.15	3492.51	1108.77	2196.42	1478.42	2069.03	-3126.06	-1108.58	-478.648	-1511.73	-1556.25
Sult2a1	Q262H	SNP	15		TRUE			KNHFTVAHAEAFDKV		FTVAHAEAF	9	H2-Dd	0.2284	KNHFTVAHAEAFDKV	0.2517	3815.39	1911.79	2863.59	3545.04	2620.29	2716.89	2015.17	2762.79	2411.16	2440.23	2877.44	2622.9	-782.253	-209.133	-276.661	862.265	-101.446
Sult2a1	Q262H	WT	15		TRUE			KNHFTVAQAEAFDKV		NHFTVAQAEAF	11	H2-Kd	0.2005	KNHFTVAQAEAFDKV	0.2973	2639.03	2511.28	2575.15	1405.19	1278.31	2694.36	2460.07	1766.31	1236.26	3357.21	2639.03	2249.7	361.12	-42.0512	662.848	178.961	290.219
Isoc1	V205L	SNP	15		TRUE			IPGVRSVLLFGVETH		IPGVRSVLLF	10	H2-Ld	0.465	VEAALAEIPGVRSVL	0.4305	3048.19	2392.45	2720.32	1494.15	1737.77	2811.34	2101.23	1545.05	1737.77	2908.75	3017.68	2302.31	50.8968	0	97.409	916.449	266.189
Isoc1	V205L	WT	15		TRUE			IPGVRSVVLFGVETH		IPGVRSVVLF	10	H2-Ld	0.445	VEAALAEIPGVRSVV	0.4312	2527.27	2359.02	2443.14	1289.69	1619.89	2302.13	1564.8	1177.64	3048.19	2112.52	2511.28	2212.41	-112.045	1428.31	-189.611	946.475	518.281
Abcc4	I1140K	SNP	15		TRUE			DPRTDELKQQKIREK	TRUE	KQQKIREKF	9	H2-Kd	0.2066	TDELKQQKIREKFAQ	0.2099	1647.41	1986.37	1816.89	2392.45	2494.47	1478.42	2908.75	2239.47	4195.63	1140.49	2312.59	2472.05	-152.977	1701.16	-337.925	-596.151	153.527
Abcc4	I1140K	WT	15		TRUE			DPRTDELIQQKIREK	TRUE	IQQKIREKF	9	H2-Kd	0.1663	DPRTDELIQQKIREK	0.2024	4369.55	2312.59	3341.07	1834.24	1564.8	2929.12	3357.21	1335.89	1527.87	2824.24	3439.69	2281.92	-498.347	-36.9288	-104.884	82.483	-139.419
Lhx4	A31S	SNP	15		TRUE			MQQIPQCSGCNQHIL		IPQCSGCNQHI	11	H2-Ld	0.3862	SGCNQHILDKFILKV	0.2916	2087.95	2824.24	2456.09	2128.23	3167.18	2247.77	1885.86	2990.15	1538.24	2460.07	1619.89	2152.09	861.924	-1628.94	212.302	-265.973	-205.173
Lhx4	A31S	WT	15		TRUE			MQQIPQCAGCNQHIL		IPQCAGCNQHI	11	H2-Ld	0.4019	AGCNQHILDKFILKV	0.2919	2302.13	2661.25	2481.69	2716.89	3492.51	2278.6	1936.38	3167.18	1694.18	2494.47	1796.99	2288.21	450.29	-1798.33	215.864	-139.391	-317.892
Taf4b	P561H	SNP	15		TRUE			TPVNAVMHTSKFPPS		MHTSKFPPSSI	11	H2-Kd	0.2706	NCGQKTPVNAVMHTS	0.3223	2511.28	3048.19	2779.73	2247.77	2966.61	2494.47	3743.11	2553.47	1449.65	2217.35	2474.17	2173.66	305.703	-1516.96	-277.116	-1268.93	-689.326
Taf4b	P561H	WT	15		TRUE			TPVNAVMPTSKFPPS		MPTSKFPPSSI	11	H2-Ld	0.3327	GQKTPVNAVMPTSKF	0.3228	1796.99	2440.23	2118.61	1689.3	1949.38	1516.61	2204.62	1737.77	1582.33	1796.99	1808.67	1731.44	48.4665	-367.05	280.382	-395.951	-108.538
Cpxm1	L625I	SNP	15		TRUE			VRDKDTEIGIADAVI		IGIADAVI	8	H2-Kd	0.2442	DKDTEIGIADAVIAV	0.3425	2326.84	1925.96	2126.4	2440.23	1867.35	2460.07	1551.88	2153.93	1959.36	2376.47	1437.68	1981.86	-286.296	92.0114	-83.5982	-114.202	-98.0213
Cpxm1	L625I	WT	15		TRUE			VRDKDTELGIADAVI		LGIADAVI	8	H2-Kd	0.1968	DKDTELGIADAVIAV	0.3413	3167.18	1737.77	2452.47	2411.16	1885.86	2376.47	2069.23	1709.75	1896.4	2278.6	2966.61	2212.84	-701.413	10.5421	-97.8659	897.377	27.16
Malt1	T534A	SNP	15			TRUE	CD4	LLEDKKIAVLLDEVA		RLLEDKKIAVL	11	H2-Kd	0.1889	RLLEDKKIAVLLDEV	0.3074	2854.85	2571.99	2713.42	2620.29	1911.79	2737.16	2527.27	2595.95	1808.67	2966.61	2571.99	2485.81	-24.3367	-103.114	229.454	44.7226	36.6813
Malt1	T534A	WT	15			TRUE	CD4	LLEDKKITVLLDEVA		RLLEDKKITVL	11	H2-Kd	0.2168	RLLEDKKITVLLDEV	0.2466	1754.73	1694.18	1724.45	3623.53	2411.16	1437.68	2786.07	2527.27	2460.07	1538.24	2460.07	2246.41	-1096.26	48.9094	100.556	-326.001	-318.199
Olfr1216	K20R	SNP	15		TRUE			LGLSQNPRIEKILFV		SQNPRIEKI	9	H2-Kd	0.3725	SVTEFIILGLSQNPR	0.1542	1949.38	1108.77	1529.08	2527.27	1449.65	1754.73	1345.92	1375.32	1619.89	1248.47	1607.47	1462.79	-1151.95	170.236	-506.256	261.552	-306.605
Olfr1216	K20R	WT	15		TRUE			LGLSQNPKIEKILFV		SQNPKIEKI	9	H2-Kd	0.2931	SVTEFIILGLSQNPK	0.1509	2990.15	2737.16	2863.65	1619.89	1659.35	3017.68	2423.29	2290.34	2032.9	3623.53	2716.89	2665.91	670.452	373.547	605.852	293.596	485.862
Abca13	Q4266H	SNP	15		TRUE			LLRKFRDHDPVCADA		KFRDHDPV	8	H2-Kd	0.1608	FRDHDPVCADAFRMN	0.4287	1694.18	4127.42	2910.8	1819.37	3743.11	2262.24	3076.97	1959.36	1345.92	3076.97	1754.73	2034.25	139.985	-2397.18	814.729	-1322.24	-691.178
Abca13	Q4266H	WT	15		TRUE			LLRKFRDQDPVCADA		KFRDQDPV	8	H2-Kd	0.1355	FRDQDPVCADAFRMN	0.3954	1345.92	1607.47	1476.7	951.092	1205	1464.47	1405.19	1158.98	951.092	1779.18	1108.77	1249.51	207.886	-253.906	314.705	-296.419	-6.93349
Adam24	A730P	SNP	15		TRUE			KKSREAAPSQPAEER		APSQPAEERV	10	H2-Ld	0.1115	GATKKSREAAPSQPA	0.2613	2675.06	1516.61	2095.84	2553.47	1850.66	2231.21	1593.72	1885.86	2053.82	1885.86	1772.73	1899.57	-667.61	203.163	-345.348	179.014	-157.695
Adam24	A730P	WT	15		TRUE			KKSREAAASQPAEER		REAAASQPA	9	H2-Kd	0.0756	GATKKSREAAASQPA	0.3317	2620.29	1896.4	2258.35	1090.26	1158.98	2511.28	2411.16	1065.19	845.95	2359.02	2262.24	1633.1	-25.0787	-313.028	-152.257	-148.914	-159.819
Olfr1278	M208V	SNP	15		TRUE			ANSGFISVGTFLLLI		GFISVGTFL	9	H2-Kd	0.4133	TANSGFISVGTFLLL	0.2829	3244.03	2112.52	2678.27	1464.47	1301.1	2877.44	3395.5	1195.97	1551.88	2620.29	5785.38	2788.38	-268.502	250.78	-257.148	2389.88	528.753
Olfr1278	M208V	WT	15		TRUE			ANSGFISMGTFLLLI		GFISMGTFL	9	H2-Kd	0.4649	TANSGFISMGTFLLL	0.3502	2032.9	1149.7	1591.3	2694.36	1375.32	1861.35	1375.32	1289.69	1754.73	1289.69	1717.02	1512.78	-1404.67	379.412	-571.663	341.706	-313.805
Nlrp14	S155R	SNP	15		TRUE			EQVLSKPRSLLFIID		KPRSLLFII	9	H2-Ld	0.365	SSEGPIEQVLSKPRS	0.2592	2440.23	2302.13	2371.18	1766.31	1573.3	2440.23	1975.26	2262.24	2069.23	3314.02	2175.55	2455.26	495.931	495.929	873.793	200.291	516.486
Nlrp14	S155R	WT	15		TRUE			EQVLSKPSSLLFIID		KPSSLLFII	9	H2-Ld	0.4128	SSEGPIEQVLSKPSS	0.2618	1850.66	1819.37	1835.01	2990.15	2553.47	1449.65	2675.06	2343.78	2786.07	1437.68	2620.29	2296.96	-646.37	232.6	-11.968	-54.7727	-120.128
Gzmc	P33S	SNP	15		TRUE			EISPHSRSYMAYYEF	TRUE	SYMAYYEFL	9	H2-Kd	0.7841	PHSRSYMAYYEFLKV	0.3136	1551.88	1335.89	1443.89	1449.65	1335.89	1593.72	1248.47	1564.8	5785.38	1205	1140.49	2423.92	115.151	4449.49	-388.722	-107.98	1016.99
Gzmc	P33S	WT	15		TRUE			EISPHSRPYMAYYEF	TRUE	RPYMAYYEF	9	H2-Ld	0.7363	PHSRPYMAYYEFLKV	0.2381	2204.62	2990.15	2597.39	3439.69	4751.81	2217.35	2162.29	4002.92	9103.55	2595.95	2247.77	4487.55	563.224	4351.75	378.603	85.4763	1344.76
Lyst	S850F	SNP	15		TRUE			DIQQELPFLSVGPSL		LPFLSVGPSL	10	H2-Ld	0.4985	LDIQQELPFLSVGPS	0.2568	1564.8	2966.61	2265.7	1808.67	1796.99	1911.79	2247.77	2376.47	1819.37	2553.47	1709.75	2114.76	567.796	22.3812	641.681	-538.021	173.459
Lyst	S850F	WT	15		TRUE			DIQQELPSLSVGPSL		LPSLSVGPSL	10	H2-Ld	0.4235	LDIQQELPSLSVGPS	0.3153	1538.24	1949.38	1743.81	2175.55	1478.42	1319.29	2262.24	1911.79	2247.77	1449.65	2128.23	1934.36	-263.761	769.346	130.358	-134.018	125.481
Enho	L10I	SNP	15		TRUE	TRUE	CD4	AAISQGAIIAIVCNG		MGAAISQGAI	10	H2-Kd	0.2843	MGAAISQGAIIAIVC	0.326	2966.61	2262.24	2614.43	3167.18	2359.02	2990.15	1573.3	2290.34	2762.79	2527.27	2069.23	2412.41	-876.843	403.772	-462.881	495.929	-110.006
Enho	L10I	WT	15		TRUE	TRUE	CD4	AAISQGALIAIVCNG		SQGALIAI	8	H2-Kd	0.3186	MGAAISQGALIAIVC	0.3441	1268.74	1345.92	1307.33	1010.18	905.076	1569.05	1205	816.725	2153.93	1494.15	1195.97	1415.19	-193.456	1248.86	-74.8967	-9.02676	242.87
Olfr50	M146V	SNP	15		TRUE			SLCVLLVVVSWAFSS		SQSLCVLLVVV	11	H2-Kd	0.1853	MSQSLCVLLVVVSWA	0.3349	2153.93	2423.29	2288.61	2006.65	1357.12	3244.03	1896.4	1694.18	2204.62	2716.89	1896.4	2128.02	-312.467	847.505	-527.137	0	1.97528
Olfr50	M146V	WT	15		TRUE			SLCVLLVMVSWAFSS		LVMVSWAF	8	H2-Ld	0.2677	YTTIMSQSLCVLLVM	0.3243	1527.87	1709.75	1618.81	2101.23	1936.38	1357.12	2302.13	2043.33	2990.15	1564.8	1911.79	2127.52	-57.8958	1053.77	207.681	-390.342	203.303
Vmn1r9	V126D	SNP	15		TRUE			LKKYMVCDFLCIWSF		KYMVCDFL	8	H2-Kd	0.7196	LKKYMVCDFLCIWSF	0.3595	2460.07	1766.31	2113.19	3244.03	2302.13	1986.37	1994.94	2175.55	2392.45	2015.17	2527.27	2277.61	-1068.48	90.3178	28.8028	532.327	-104.258
Vmn1r9	V126D	WT	15		TRUE			LKKYMVCVFLCIWSF		KYMVCVFL	8	H2-Kd	0.6818	LKKYMVCVFLCIWSF	0.4222	1819.37	1633.77	1726.57	1248.47	1108.77	1659.35	1538.24	1268.74	1975.26	2343.78	1684.43	1818.05	20.2634	866.483	684.427	146.194	429.342
B3galnt1	D267V	SNP	15		TRUE			VKPIKFEVVYVGICL		KPIKFEVVYV	10	H2-Ld	0.3077	YEMMSHVKPIKFEVV	0.2184	1936.38	1936.38	1936.38	1689.3	1422.15	2053.82	1619.89	1842.43	2087.95	2694.36	1737.77	2090.63	153.13	665.799	640.543	117.88	394.338
B3galnt1	D267V	WT	15		TRUE			VKPIKFEDVYVGICL		KPIKFEDVYV	10	H2-Ld	0.262	YEMMSHVKPIKFEDV	0.2112	1668.18	2032.9	1850.54	2204.62	1709.75	1335.89	2217.35	1986.37	1911.79	2175.55	2087.95	2040.41	-218.253	202.043	839.658	-129.405	173.511
Kif2b	G454R	SNP	15		TRUE			DLAGNERRADTAKAT		AGNERRADTA	10	H2-Kd	0.0537	AGNERRADTAKATRK	0.323	1834.24	1494.15	1664.19	816.725	756.368	1717.02	1779.18	776.395	776.395	1896.4	1516.61	1241.45	-40.3303	20.0265	179.377	-262.568	-25.8739
Kif2b	G454R	WT	15		TRUE			DLAGNERGADTAKAT		AGNERGADTA	10	H2-Kd	0.0544	AGNERGADTAKATRK	0.2167	2474.17	1527.87	2001.02	3129.31	2527.27	1850.66	2112.52	2112.52	2511.28	1814.02	2359.02	2199.21	-1016.79	-15.9938	-36.6388	246.5	-205.73
Adamts9	I623L	SNP	15			TRUE	CD4	GFSSFQKLRLDLTSM		SFQKLRLDL	9	H2-Kd	0.3315	QKLRLDLTSMQIITT	0.3452	2069.23	1647.41	1858.32	1422.15	1607.47	1494.15	1717.02	2716.89	3623.53	1405.19	1220.14	2241.44	1294.74	2016.06	-88.9556	-496.884	681.239
Adamts9	I623L	WT	15			TRUE	CD4	GFSSFQKIRLDLTSM		AGFSSFQKI	9	H2-Kd	0.3855	QKIRLDLTSMQIITT	0.342	1582.33	1779.18	1680.76	905.076	1405.19	1158.98	1301.1	1123.51	3244.03	1158.98	1335.89	1715.6	218.43	1838.83	0	34.7878	523.013
Olfr862	F161V	SNP	15		TRUE			MNSLVHYVIVSQLKF		SYMNSLVHYVI	11	H2-Kd	0.823	SYMNSLVHYVIVSQL	0.2983	1925.96	2101.23	2013.6	3314.02	2786.07	1301.1	2877.44	2571.99	3545.04	1195.97	2411.16	2431.04	-742.03	758.975	-105.132	-466.281	-138.617
Olfr862	F161V	WT	15		TRUE			MNSLVHYFIVSQLKF		SYMNSLVHYFI	11	H2-Kd	0.8248	SYMNSLVHYFIVSQL	0.2572	1911.79	1123.51	1517.65	1391.76	1248.47	1278.31	1289.69	1582.33	5456.72	1319.29	1936.38	2573.68	190.572	4208.25	40.9806	646.697	1271.62
Tcf3	S255N	SNP	15		TRUE			PLPLAPGNSSVGSGT		LPLAPGNSSV	10	H2-Ld	0.2925	GDGSSPLPLAPGNSS	0.1547	1717.02	1861.35	1789.19	1607.47	1195.97	2661.25	1949.38	1516.61	1516.61	2474.17	1538.24	1761.41	-90.8641	320.639	-187.072	-411.146	-92.1108
Tcf3	S255N	WT	15		TRUE			PLPLAPGSSSVGSGT		LPLAPGSSSV	10	H2-Ld	0.3066	GDGSSPLPLAPGSSS	0.1776	1659.35	1754.73	1707.04	1268.74	1065.19	2101.23	1449.65	951.092	930.648	1659.35	1391.76	1233.21	-317.646	-134.538	-441.875	-57.888	-237.987
Olfr881	C101Y	SNP	15		TRUE			NIISHAEYMTQLFFF		SHAEYMTQL	9	H2-Kd	0.3652	LVSFVKQNIISHAEY	0.2709	1607.47	1659.35	1633.41	3017.68	2705.6	1123.51	2053.82	2639.03	3357.21	1949.38	2343.78	2572.35	-378.649	651.607	825.878	289.962	347.199
Olfr881	C101Y	WT	15		TRUE			NIISHAECMTQLFFF		SHAECMTQL	9	H2-Kd	0.4252	VKQNIISHAECMTQL	0.2718	2053.82	1573.3	1813.56	1994.94	1819.37	1619.89	1464.47	2196.42	2553.47	3212.74	1668.18	2407.7	201.474	734.095	1592.85	203.702	683.03
Zmynd12	R13C	SNP	15		TRUE			PLAVPKGCRLSCEVC		YPLAVPKGCRL	11	H2-Ld	0.5286	NVIYPLAVPKGCRLS	0.3012	1220.14	1405.19	1312.67	1647.41	1925.96	1975.26	1177.64	2101.23	1709.75	1551.88	1236.26	1649.78	453.816	-216.217	-423.374	58.6177	-31.7892
Zmynd12	R13C	WT	15		TRUE			PLAVPKGRRLSCEVC		YPLAVPKGRRL	11	H2-Ld	0.5388	NVIYPLAVPKGRRLS	0.306	2128.23	2015.17	2071.7	2217.35	2811.34	1885.86	3212.74	1449.65	2376.47	1861.35	2112.52	1950	-767.702	-434.867	-24.5088	-1100.22	-581.824
Dmrta2	R73G	SNP	15			TRUE	CD4	TPKCARCGNHGVVSA		CGNHGVVSAL	10	H2-Kd	0.2827	CGNHGVVSALKGHKR	0.3057	1248.47	1593.72	1421.1	1717.02	2762.79	1375.32	1505.63	1796.99	1861.35	1268.74	1319.29	1561.59	79.9681	-901.44	-106.581	-186.337	-278.597
Dmrta2	R73G	WT	15			TRUE	CD4	TPKCARCRNHGVVSA		RNHGVVSAL	9	H2-Kd	0.3766	CRNHGVVSALKGHKR	0.3842	1737.77	2128.23	1933	1936.38	2128.23	1873.36	1195.97	1975.26	1391.76	1873.36	1494.15	1683.63	38.874	-736.465	0	298.178	-99.8533
Glycam1	T45I	SNP	15		TRUE			PAAQSTPISYTSEES		IPAAQSTPI	9	H2-Ld	0.4078	DAIPAAQSTPISYTS	0.3166	1494.15	1834.24	1664.19	606.27	727.572	2015.17	1709.75	727.572	695.179	2262.24	1564.8	1312.45	121.302	-32.3934	247.07	-144.945	47.7585
Glycam1	T45I	WT	15		TRUE			PAAQSTPTSYTSEES		IPAAQSTPTSY	11	H2-Ld	0.1776	TQPTDAIPAAQSTPT	0.2427	2015.17	1236.26	1625.72	1986.37	1345.92	1896.4	1633.77	1405.19	1464.47	1709.75	1694.18	1568.4	-581.178	118.551	-186.656	60.4113	-147.218
Kbtbd2	T91R	SNP	15		TRUE	TRUE	CD4	MIIAYAYRGNLAVND		AYAYRGNL	8	H2-Kd	0.5157	DAAALQMIIAYAYRG	0.5273	2278.6	1796.99	2037.8	1551.88	1582.33	2204.62	1766.31	2431.75	3167.18	1850.66	1834.24	2320.96	879.862	1584.85	-353.969	67.9247	544.666
Kbtbd2	T91R	WT	15		TRUE	TRUE	CD4	MIIAYAYTGNLAVND		AYAYTGNL	8	H2-Kd	0.5846	DAAALQMIIAYAYTG	0.5146	1140.49	816.725	978.61	1564.8	1538.24	727.572	1494.15	1478.42	3439.69	796.911	1772.73	1871.94	-86.3805	1901.46	69.339	278.585	540.75
Cyp2c39	S99G	SNP	15		TRUE			EEFSDRGGIPMVEKI		GGIPMVEKI	9	H2-Kd	0.3029	EEFSDRGGIPMVEKI	0.1642	1108.77	1248.47	1178.62	1278.31	695.179	1027.45	1335.89	756.368	1186.77	1464.47	1248.47	1164.02	-521.943	491.593	437.028	-87.4168	79.8153
Cyp2c39	S99G	WT	15		TRUE			EEFSDRGSIPMVEKI		GSIPMVEKI	9	H2-Kd	0.2267	EEFSDRGSIPMVEKI	0.2544	1808.67	1808.67	1808.67	2661.25	2112.52	1505.63	2661.25	1949.38	2217.35	1505.63	2217.35	1972.43	-711.862	104.833	0	-443.893	-262.73
Olfr77	A300S	SNP	15		TRUE			RNKDVKGSLVRLLRR		KGSLVRLL	8	H2-Kd	0.1876	NKDVKGSLVRLLRRV	0.2808	1205	2053.82	1629.41	2032.9	2247.77	1684.43	930.648	1499.88	1010.18	1593.72	2043.33	1536.78	-533.023	-1237.59	-90.7115	1112.69	-187.159
Olfr77	A300S	WT	15		TRUE			RNKDVKGALVRLLRR		KGALVRLL	8	H2-Kd	0.249	NKDVKGALVRLLRRV	0.3161	985.407	1668.18	1326.79	2737.16	2737.16	1737.77	869.732	2043.33	1248.47	1357.12	1375.32	1506.06	-693.822	-1488.68	-380.646	505.587	-514.391
Mrgprd	S28T	SNP	15		TRUE			LVTWIYFTVTFLAMA		IYFTVTFL	8	H2-Kd	0.6255	TVTFLAMATCVGGMA	0.4248	1478.42	1717.02	1597.72	2511.28	2087.95	1140.49	1684.43	1842.43	4127.42	1236.26	1593.72	2199.96	-668.847	2039.48	95.7654	-90.7115	343.921
Mrgprd	S28T	WT	15		TRUE			LVTWIYFSVTFLAMA		IYFSVTFL	8	H2-Kd	0.6457	SVTFLAMATCVGGMA	0.4248	1375.32	1090.26	1232.79	1108.77	845.95	1177.64	1278.31	1205	2908.75	1345.92	1205	1666.17	96.2235	2062.8	168.28	-73.3129	563.497
Slc19a3	F185L	SNP	15		TRUE			LACVSVALFFSLFLP		VSVALFFSLF	10	H2-Dd	0.3682	SSLFYISLACVSVAL	0.4408	1422.15	930.648	1176.4	1527.87	1289.69	1391.76	1236.26	1499.88	2196.42	2392.45	1158.98	1811.93	-27.9935	906.729	1000.69	-77.2821	450.535
Slc19a3	F185L	WT	15		TRUE			LACVSVAFFFSLFLP		FFFSLFLPM	9	H2-Ld	0.3884	SSLFYISLACVSVAF	0.4378	1959.36	1301.1	1630.23	1511.11	1593.72	1551.88	1357.12	1437.68	2474.17	2749.94	1633.77	2073.89	-73.428	880.453	1198.06	276.648	570.433
Olfr938	N42K	SNP	15		TRUE			YLVTVVGKLGMIVLI		VYLVTVVGKL	10	H2-Kd	0.4694	VGKLGMIVLILISSQ	0.3331	930.648	1041.1	985.875	1357.12	1236.26	1108.77	1041.1	1319.29	4842.99	1041.1	930.648	2033.51	-37.8275	3606.73	-67.6733	-110.454	847.694
Olfr938	N42K	WT	15		TRUE			YLVTVVGNLGMIVLI		VYLVTVVGNL	10	H2-Kd	0.4881	VGNLGMIVLILISSQ	0.3072	1873.36	1449.65	1661.51	2376.47	2162.29	1065.19	2694.36	1896.4	2278.6	1607.47	2231.21	2003.42	-480.069	116.314	542.29	-463.155	-71.1551
Mc3r	A214G	SNP	15		TRUE			YIHMFLFGRLHVQRI		LYIHMFLFGRL	11	H2-Kd	0.5067	FGRLHVQRIAVLPPA	0.5901	1027.45	1505.63	1266.54	2162.29	1808.67	1607.47	796.911	2877.44	2811.34	1391.76	1357.12	2109.41	715.15	1002.66	-215.713	560.208	515.577
Mc3r	A214G	WT	15		TRUE			YIHMFLFARLHVQRI		LYIHMFLFARL	11	H2-Kd	0.5298	FARLHVQRIAVLPPA	0.5987	1177.64	1278.31	1227.98	1573.3	2278.6	1405.19	816.725	1936.38	2966.61	1516.61	1289.69	1927.32	363.081	688.006	111.417	472.962	408.866
Fmo2	F69L	SNP	15		TRUE			TSKEMSCLSDFPMPE		KEMSCLSDF	9	H2-Kd	0.2846	NTSKEMSCLSDFPMP	0.3965	1236.26	985.407	1110.83	695.179	654.888	1779.18	1319.29	1140.49	985.407	1220.14	951.092	1074.28	445.316	330.519	-559.039	-368.2	-37.8509
Fmo2	F69L	WT	15		TRUE			TSKEMSCFSDFPMPE		KEMSCFSDFPM	11	H2-Kd	0.2704	TNTSKEMSCFSDFPM	0.3186	1391.76	1220.14	1305.95	1511.11	1041.1	1345.92	1158.98	1220.14	1301.1	1108.77	1177.64	1201.92	-290.969	260.002	-237.148	18.6645	-62.3627
St8sia3	L235F	SNP	15		TRUE			RNNFFLSFKKLDGAI	TRUE	SFKKLDGAI	9	H2-Kd	0.3651	SFKKLDGAILWIPAF	0.3107	1010.18	1383.52	1196.85	1065.19	1494.15	1422.15	1090.26	1357.12	3815.39	1737.77	1090.26	2000.13	291.934	2321.24	315.617	0	732.198
St8sia3	L235F	WT	15		TRUE			RNNFFLSLKKLDGAI	TRUE	FFLSLKKL	8	H2-Kd	0.2701	LKKLDGAILWIPAFF	0.3079	905.076	1383.52	1144.3	1754.73	2312.59	1205	1220.14	1573.3	3076.97	1582.33	1278.31	1877.73	-181.427	764.379	377.335	58.1709	254.615
Tmtc2	V201I	SNP	15		TRUE	TRUE	CD8	AVSAVYDIFVFHRLK		VSAVYDIF	8	H2-Dd	0.2958	IFVFHRLKMKQILPT	0.3984	816.725	1010.18	913.453	1375.32	1516.61	1220.14	1027.45	1041.1	1647.41	905.076	1041.1	1158.67	-334.217	130.802	-315.065	13.6559	-126.206
Tmtc2	V201I	WT	15		TRUE	TRUE	CD8	AVSAVYDVFVFHRLK		VSAVYDVF	8	H2-Dd	0.2896	VFVFHRLKMKQILPT	0.3997	1065.19	1195.97	1130.58	1177.64	1959.36	985.407	1010.18	1422.15	2112.52	756.368	1065.19	1339.06	244.506	153.16	-229.039	55.0041	55.9077
Olfr979	T75K	SNP	15		TRUE			DMWFSTVKVPKMLMT		KVPKMLMTL	9	H2-Kd	0.2567	VKVPKMLMTLVSPRG	0.4229	606.27	654.888	630.579	756.368	606.27	565.703	985.407	565.703	565.703	951.092	816.725	724.806	-190.665	-40.5666	385.389	-168.682	-3.63124
Olfr979	T75K	WT	15		TRUE			DMWFSTVTVPKMLMT		MWFSTVTV	8	H2-Kd	0.3178	VTVPKMLMTLVSPRG	0.4146	1158.98	1437.68	1298.33	1236.26	1551.88	1010.18	1516.61	869.732	1027.45	1123.51	985.407	1001.52	-366.528	-524.438	113.325	-531.204	-327.211
Cyp26a1	L316I	SNP	15		TRUE			ATSLITYIGLYPHVL	TRUE	TYIGLYPHVL	10	H2-Kd	0.6685	HETTASAATSLITYI	0.3455	796.911	606.27	701.591	1140.49	930.648	695.179	695.179	1668.18	2877.44	776.395	695.179	1504.3	527.681	1946.79	81.2162	0	638.922
Cyp26a1	L316I	WT	15		TRUE			ATSLITYLGLYPHVL	TRUE	TYLGLYPHVL	10	H2-Kd	0.6116	HETTASAATSLITYL	0.3563	951.092	905.076	928.084	869.732	951.092	654.888	951.092	930.648	2929.12	654.888	727.572	1310.56	60.9155	1978.03	0	-223.52	453.857
Zzz3	K311N	SNP	15			TRUE	CD8	FKKLKKQNLQQMQAE		KLKKQNLQQM	10	H2-Kd	0.1674	NLQQMQAESGFVQHV	0.3434	727.572	756.368	741.97	1123.51	1779.18	951.092	1108.77	796.911	796.911	816.725	796.911	801.865	-326.595	-982.268	-134.367	-311.864	-438.773
Zzz3	K311N	WT	15			TRUE	CD8	FKKLKKQKLQQMQAE		KLQQMQAESGF	11	H2-Kd	0.2697	KLQQMQAESGFVQHV	0.3505	756.368	951.092	853.73	727.572	1131.97	1041.1	654.888	1248.47	654.888	1065.19	756.368	931.229	520.902	-477.08	24.0835	101.48	42.3465
Olfr618	A290T	SNP	15		TRUE			LYVVVPPTLNPIIYG	TRUE	LYVVVPPTL	9	H2-Kd	0.4672	HILFANLYVVVPPTL	0.2496	845.95	845.95	845.95	1027.45	1177.64	776.395	606.27	1278.31	4440.43	727.572	654.888	1775.3	250.866	3262.79	-48.8228	48.6181	878.363
Olfr618	A290T	WT	15		TRUE			LYVVVPPALNPIIYG	TRUE	LYVVVPPAL	9	H2-Kd	0.4628	HILFANLYVVVPPAL	0.2941	695.179	776.395	735.787	796.911	1010.18	869.732	565.703	2006.65	4558.93	869.732	565.703	2000.25	1209.74	3548.75	0	0	1189.62
Ctsg	S133T	SNP	15		TRUE			PVALPQATKKLQPGD		LPQATKKL	8	H2-Ld	0.3784	RRSGSVKPVALPQAT	0.554	654.888	869.732	762.31	565.703	565.703	816.725	1140.49	606.27	606.27	845.95	845.95	726.11	40.5666	40.5666	29.2251	-294.544	-46.0466
Ctsg	S133T	WT	15		TRUE			PVALPQASKKLQPGD		LPQASKKL	8	H2-Ld	0.3667	RRSGSVKPVALPQAS	0.5541	776.395	695.179	735.787	930.648	816.725	796.911	1268.74	654.888	727.572	695.179	869.732	736.843	-275.76	-89.1531	-101.732	-399.006	-216.413

## Sheet: 3 IgG Peptide Array and ELISAs
IgG Peptide Array & T cell ELISA
																	IgG Array Signal Intensity	IgG Array Signal Intensity	IgG Array Signal Intensity	IgG Array Signal Intensity	IgG Array Signal Intensity	IgG Array Signal Intensity	IgG Array Signal Intensity	IgG Array Signal Intensity	IgG Array Signal Intensity	IgG Array Signal Intensity	IgG Array Signal Intensity	IgG Array Signal Intensity	IgG Array Signal Intensity	IgG Array Signal Intensity	IgG Array Signal Intensity	IgG Array Signal Intensity	IgG Array Signal Intensity	IgG Array Signal Intensity	IgG Array Signal Intensity	IgG Array Signal Intensity	IgG Array Signal Intensity	8-11mer IFNγ	8-11mer IFNγ	8-11mer IFNγ	8-11mer IFNγ	8-11mer IFNγ	8-11mer IFNγ	8-11mer IFNγ	8-11mer IFNγ	8-11mer IFNγ	8-11mer IFNγ	8-11mer IFNγ	8-11mer IFNγ
Gene	Neoepitope-site Coordinate	Neoepitope-site Version (SNV/WT)	Peptide Array Printed Sequence Length	LC-MS/MS Confirmed Parent Protein?	Independently Confirmed Neoepitope-Site by Whole Exome Sequencing	Krieter et al. 2015 "Immunogenic 4T1 Mutations"	Krieter et al. 2015 "Immunogenic 4T1 Mutations" Reactive Subtype	Peptide Array Printed Up to 15mer Sequence	Selected for Cellular Splenocyte Assays?	TOP PEPTIDE MHCI H2-Kd,Dd,Ld 1-log50k Windowed 9-11mers NetMHC Pan v2.8	TOP PEPTIDE LENGTH MHCI H2-Kd,Dd,Ld 1-log50k Windowed 9-11mers NetMHC Pan v2.8	TOP SCORE ISOFORM MHCI H2-Kd,Dd,Ld 1-log50k Windowed 9-11mers NetMHC Pan v2.8	TOP SCORE MHCI H2-Kd,Dd,Ld 1-log50k Windowed 9-11mers NetMHC Pan v2.8	8-11mer PEPTIDE PRINTED FOR T CELL ASSAYS - MATCHES FRAME OF SNV AND WT MAY NOT BE SAME AS OVERALL TOP WT MHCI BINDER	TOP PEPTIDE MHCII H2-IAd 1-log50k Windowed 15mers NetMHCII v2.2	TOP SCORE MHCII H2-IAd 1-log50k Windowed 15mers NetMHCII v2.2	R7 Naïve Raw IgG Signal Intensity	R8 Naïve Raw IgG Signal Intensity	R8b Naïve Peptide CD4 Depleted Raw IgG Signal Intensity	R9 Naïve Peptide CD4 Depleted Raw IgG Signal Intensity	R11 Naïve Peptide CD4 Depleted Raw IgG Signal Intensity	R6 autophagosome-enriched vaccine + poly I:C Raw IgG Signal Intensity	R7 autophagosome-enriched vaccine + poly I:C Raw IgG Signal Intensity	R8 autophagosome-enriched vaccine + poly I:C Raw IgG Signal Intensity	R8b autophagosome-enriched vaccine + poly I:C CD4 Depleted Raw IgG Signal Intensity	R9 autophagosome-enriched vaccine + poly I:C CD4 Depleted Raw IgG Signal Intensity	R11 autophagosome-enriched vaccine + poly I:C CD4 Depleted Raw IgG Signal Intensity	R7 R8 Naïve Average Raw IgG Signal Intensity	R6 R7 R8 autophagosome-enriched vaccine + poly I:C Average Raw IgG Signal Intensity	Difference in Preliminary IgG Signal Intensity	R7 R8 R8b R9 R11 Naïve Average Raw IgG Signal Intensity	R7 R8 R8b R9 R11 Average autophagosome-enriched vaccine + poly I:C Raw IgG Signal Intensity	R7 Difference (Positive Increased in Vaccine Group over Naïve)	R8 Difference (Positive Increased in Vaccine Group over Naïve)	R8b Difference (Positive Increased in Vaccine Group over Naïve)	R9 Difference (Positive Increased in Vaccine Group over Naïve)	R11 Difference (Positive Increased in Vaccine Group over Naïve)	Preliminary R7 Naïve Peptide Restim Increase over Splenocyte Only Restim	Preliminary R8 Naïve Peptide Restim Increase over Splenocyte Only Restim	Preliminary R6 4T1 autophagosome-enriched vaccine + poly I:C Peptide Restim Increase over Splenocyte Only Restim	Preliminary R7 4T1 autophagosome-enriched vaccine + poly I:C Peptide Restim Increase over Splenocyte Only Restim	Preliminary R8 4T1 autophagosome-enriched vaccine + poly I:C Peptide Restim Increase over Splenocyte Only Restim	Preliminary R7 R8 Average Naïve Peptide Restim Increase over Splenocyte Only Restim	Preliminary R6 R7 R8 Average 4T1 autophagosome-enriched vaccine + poly I:C Peptide Restim Increase over Splenocyte Only Restim	Difference in Preliminary Average Vaccine Groups over Naïve	R8 Naïve CD4 Depleted Peptide Restim	R9 Naïve CD4 Depleted Peptide Restim	R11 Naïve CD4 Depleted Peptide Restim	R8 4T1 autophagosome-enriched vaccine + poly I:C CD4 Depleted Peptide Restim
AH1	gp70 423-431	AH1	9	N/A	N/A			SPSYVYHQF	TRUE	SPSYVYHQF	9	H2-Ld	0.5344	SPSYVYHQF	SPSYVYHQF	0.022	4816.67	11461.3	10333.7	9224.67	7293	6562.5	25653	10750	9816	9328.33	8210	8139	14321.8	6182.83	8625.87	12751.5	20836.3	-711.333	-517.667	103.667	917	0	0	848.41	0	4152.78	0	1667.06	1667.06	1092.85	321.173	78	538.155
Dpp9	G633E	SNP	15	TRUE	TRUE			KPHTLQPERKHPTVL	TRUE	QPERKHPTVLF	11	H2-Ld	0.2465	QPGRKHPTVLF	QPERKHPTVLFVYGG	0.2338	3023.33	2965	2102	3099.33	3057	1241	13826	3177	3154.67	2819.33	3468.33	2994.17	6081.33	3087.17	2849.33	5289.07	10802.7	212	1052.67	-280	411.333	0	324.682	1576.06	50.4757	531.169	162.341	719.235	556.894	396.801	313.018	78	1304.81
Gen1	K707N	SNP	15	TRUE		TRUE	CD4	RVAVKTTNNLVMKNS	TRUE	RVAVKTTNNL	10	H2-Kd	0.2096	RVAVKTTKNL	TNNLVMKNSVCLERD	0.3403	1219.67	752	865.333	367.333	893	308	2037	1395.33	2058.33	549.333	1723.67	985.833	1246.78	260.944	819.467	1552.73	817.333	643.333	1193	182	830.667	1385.44	623.875	1399.34	234.415	1360.88	1004.66	998.212	-6.44502	312.244	241.34	78	207.705
Ilkap	I127S	SNP	15	TRUE	TRUE	TRUE	CD4	EMQDAHVSLNDITQE	TRUE	AHVSLNDI	8	H2-Kd	0.3024	AHVILNDI	REEMQDAHVSLNDIT	0.2773	573	303	607	228	649	412.667	550	789	1406.67	413	1289.67	438	583.889	145.889	472	889.667	-23	486	799.667	185	640.667	0	0	0	452.922	0	0	150.974	150.974	461.094	284.723	78	156
Lrpprc	L1347M	SNP	15	TRUE	TRUE			EYLTAKNMKLDDLFL	TRUE	EYLTAKNMKL	10	H2-Kd	0.291	EYLTAKNLKL	AKNMKLDDLFLKRYA	0.3541	1005	1102.33	1264.33	399	1137.33	269	1997.67	1047.67	1934.67	589.667	1898.33	1053.67	1104.78	51.1111	981.6	1493.6	992.667	-54.6667	670.333	190.667	761	0	558.148	895.901	0	2518.2	279.074	1138.03	858.961	357.751	234.802	78	531.203
Man2b2	V210I	SNP	15	TRUE	TRUE			QQEIFTHIMDHYSYC	TRUE	SGQQEIFTHI	10	H2-Kd	0.3491	SGQQEIFTHY	SPSLSGQQEIFTHIM	0.2301	511	469	780.667	302	871	478	765	957.333	1244	696.333	1346.33	490	733.444	243.444	586.733	1001.8	254	488.333	463.333	394.333	475.333	25.8329	0	634.229	99.8163	0	12.9164	244.682	231.765	182.969	246.237	78	373.708
Polr2a	M1102I	SNP	15	TRUE	TRUE	TRUE	CD4	LGEPATQITLNTFHY	TRUE	TQITLNTF	8	H2-Kd	0.273	TQMTLNTF	GEPATQITLNTFHYA	0.278	936	524	740.333	309.333	736	409.5	2186.67	1083.67	1444	502.333	1048.33	730	1226.61	496.611	649.133	1253	1250.67	559.667	703.667	193	312.333	0	0	0	1445.32	1200.44	0	881.921	881.921	652.645	265.005	78	573.915
Wdr11	T340I	SNP	15	TRUE		TRUE	CD8	LDPVQELIYDLRSQC	TRUE	IYDLRSQCDAI	11	H2-Kd	0.3683	TYDLRSQCDAI	IYDLRSQCDAIRVTK	0.3029	957.333	955	1105.33	372.333	972.333	306.5	1823.67	1256.33	1994.33	497.333	1265.33	956.167	1128.83	172.667	872.467	1367.4	866.333	301.333	889	125	293	0	326.91	0	582.776	2655.31	163.455	1079.36	915.906	369.454	324.689	78	522.229
Wdr33	H13Y	SNP	15	TRUE	TRUE			GSPPRFFYMPRFQHQ	TRUE	SPPRFFYM	8	H2-Ld	0.5497	SPPRFFHM	SPPRFFYMPRFQHQA	0.1919	2855.33	3016.67	3155.67	1896.67	2369.67	1175	9370.33	3654.33	4347	1825.33	3586	2936	4733.22	1797.22	2658.8	4556.6	6515	637.667	1191.33	-71.3333	1216.33	1214.61	556.265	2101.73	567.804	6495.66	885.436	3055.07	2169.63	769.855	252.231	96.4111	2219.57
Zfr	K411T	SNP	15	TRUE	TRUE	TRUE	CD4	AKHQKVVTLHTKLGK	TRUE	KHQKVVTL	8	H2-Kd	0.3877	KHQKVVKL	IRGAKHQKVVTLHTK	0.3615	1337.33	1352	1333.67	851.667	1626.67	1164.5	5716	2219	2480.33	1135.33	1789.5	1344.67	3033.17	1688.5	1300.27	2668.03	4378.67	867	1146.67	283.667	162.833	72.6451	0	1949.93	718.571	1364.69	36.3226	1344.4	1308.07	276.839	257.738	78	656.84
Dpp9	G633E	WT	15	TRUE	TRUE			KPHTLQPGRKHPTVL	TRUE	QPGRKHPTVLF	11	H2-Ld	0.2844	QPERKHPTVLF	YKPHTLQPGRKHPTV	0.2278	2573.33	3754.33	3945	2489.67	3285	1131.5	16383.7	5258.33	7516.67	2135	3659.67	3163.83	7591.17	4427.33	3209.47	6990.67	13810.3	1504	3571.67	-354.667	374.667	0	0	966.558	0	299.592	0	422.05	422.05	282.821	284.221	78	1333
Gen1	K707N	WT	15	TRUE		TRUE	CD4	RVAVKTTKNLVMKNS	TRUE	KNLVMKNSVCL	11	H2-Kd	0.194	RVAVKTTNNL	TKNLVMKNSVCLERD	0.369	1476.33	710	1056	795	1445.67	491.5	3220.33	1174	1758.33	948.333	1483.33	1093.17	1628.61	535.444	1096.6	1716.87	1744	464	702.333	153.333	37.6667	0	204.367	1476.76	0	0	102.184	492.252	390.069	667.25	282.694	81.42	1562.7
Ilkap	I127S	WT	15	TRUE	TRUE	TRUE	CD4	EMQDAHVILNDITQE	TRUE	AHVILNDI	8	H2-Kd	0.2461	AHVSLNDI	REEMQDAHVILNDIT	0.2188	748.333	406	573	263	585	256	943	865.333	1347.33	400.667	1082.67	577.167	688.111	110.944	515.067	927.8	194.667	459.333	774.333	137.667	497.667	0	60.1624	305.673	0	0	30.0812	101.891	71.8098	983.539	251.548	91.5495	408.378
Lrpprc	L1347M	WT	15	TRUE	TRUE			EYLTAKNLKLDDLFL	TRUE	LYEYLTAKNL	10	H2-Kd	0.3438	EYLTAKNMKL	AKNLKLDDLFLKRYA	0.3059	824.333	527	751.667	234.333	679	206.5	1460.33	854.667	1486.67	438.667	1436.33	675.667	840.5	164.833	603.267	1135.33	636	327.667	735	204.333	757.333	0	589.145	18946	6127.64	0	294.572	8357.87	8063.3	206.088	251.575	78	352.554
Man2b2	V210I	WT	15	TRUE	TRUE			QQEIFTHVMDHYSYC	TRUE	SGQQEIFTHV	10	H2-Kd	0.2193	SGQQEIFTHI	SPSLSGQQEIFTHVM	0.2522	480.333	401	501	344.667	937.333	668.333	561.667	801.333	833.667	628	1435	440.667	677.111	236.444	532.867	851.933	81.3333	400.333	332.667	283.333	497.667	113.049	0	1167.61	756.112	0	56.5245	641.239	584.715	156	219.715	78	889.051
Polr2a	M1102I	WT	15	TRUE	TRUE	TRUE	CD4	LGEPATQMTLNTFHY	TRUE	TQMTLNTF	8	H2-Kd	0.3557	TQITLNTF	GEPATQMTLNTFHYA	0.355	1821.33	902.667	1459.67	584.667	1521.33	922	4126.67	1357	2329	1510	3654.33	1362	2135.22	773.222	1257.93	2595.4	2305.33	454.333	869.333	925.333	2133	0	1041.68	1821.5	305.424	0	520.841	708.976	188.135	350.104	238.978	78	1229.54
Wdr11	T340I	WT	15	TRUE		TRUE	CD8	LDPVQELTYDLRSQC	TRUE	TYDLRSQCDAI	11	H2-Kd	0.34	IYDLRSQCDAI	TYDLRSQCDAIRVTK	0.3035	1167.67	507.667	840.333	570.667	1003	398.5	1124	1002.33	1815	693.333	2015.67	837.667	841.611	3.94444	817.867	1330.07	-43.6667	494.667	974.667	122.667	1012.67	0	0	1341.63	351.632	1390.02	0	1027.76	1027.76	156	270.387	78	1254.3
Wdr33	H13Y	WT	15	TRUE	TRUE			GSPPRFFHMPRFQHQ	TRUE	SPPRFFHM	8	H2-Ld	0.4778	SPPRFFYM	SPPRFFHMPRFQHQA	0.1797	3776.33	5987.67	6628	5214.67	4225	1556.5	18105.7	6168	7100.67	2748.67	3809.67	4882	8610.06	3728.06	5166.33	7586.53	14329.3	180.333	472.667	-2466	-415.333	0	196.422	2205.28	0	0	98.2112	735.092	636.881	156	247.587	78	182.058
Zfr	K411T	WT	15	TRUE	TRUE	TRUE	CD4	AKHQKVVKLHTKLGK	TRUE	KHQKVVKL	8	H2-Kd	0.288	KHQKVVTL	RGAKHQKVVKLHTKL	0.3751	1804.33	1565.33	1496.33	909	1972.33	573.5	7225.67	2952.33	3163.33	991	2163.67	1684.83	3583.83	1899	1549.47	3299.2	5421.33	1387	1667	82	191.333	0	0	540.775	35.755	0	0	192.177	192.177	362.021	251.218	78	773.74
Abcc4	I1140K	SNP	15		TRUE			DPRTDELKQQKIREK	TRUE	KQQKIREKF	9	H2-Kd	0.2066	IQQKIREKF	TDELKQQKIREKFAQ	0.2099	906.333	358	711	555.333	984.667	388	773.667	941.667	1644.33	762	1988.33	632.167	701.111	68.9444	703.067	1222	-132.667	583.667	933.333	206.667	1003.67	2374.87	0	1430.37	0	0	1187.44	476.789	-710.648	178.598	253.77	78	414.937
Cyp26a1	L316I	SNP	15		TRUE			ATSLITYIGLYPHVL	TRUE	TYIGLYPHVL	10	H2-Kd	0.6685	TYLGLYPHVL	HETTASAATSLITYI	0.3455	977.333	470	457.667	346	288.667	189.5	401	493	596	288.667	422.667	723.667	361.167	-362.5	507.933	440.267	-576.333	23	138.333	-57.3333	134	0	0	0	0	0	0	0	0	516.401	264.177	78	433.604
Gzmc	P33S	SNP	15		TRUE			EISPHSRSYMAYYEF	TRUE	SYMAYYEFL	9	H2-Kd	0.7841	PYMAYYEFL	PHSRSYMAYYEFLKV	0.3136	1305.67	726.333	1164.67	507.667	974	593	1516	1379.67	2308.33	766.333	1220.67	1016	1162.89	146.889	935.667	1438.2	210.333	653.333	1143.67	258.667	246.667	183.386	0	281.779	577.261	0	91.693	286.347	194.654	550.825	226.067	78	535.673
Olfr618	A290T	SNP	15		TRUE			LYVVVPPTLNPIIYG	TRUE	LYVVVPPTL	9	H2-Kd	0.4672	LYVVVPPAL	HILFANLYVVVPPTL	0.2496	1094.67	651.667	559.667	421.333	460.667	662.5	679	656	944.333	523.333	683	873.167	665.833	-207.333	637.6	697.133	-415.667	4.33333	384.667	102	222.333	0	0	2374.29	0	0	0	791.431	791.431	156	223.123	78	156
Qars	E530D	SNP	15		TRUE			RRRGFPPDAINNFCA	TRUE	RGFPPDAI	8	H2-Kd	0.2819	RGFPPEAI	DAINNFCARVGVTVA	0.3228	3940	7018	6948.33	5395	5184.33	2465.5	18386	5801.67	6779	2658.67	5187.33	5479	8884.39	3405.39	5697.13	7762.53	14446	-1216.33	-169.333	-2736.33	3	84.6384	0	977.07	498.175	1593.71	42.3192	1022.99	980.667	529.103	236.831	78	156
St8sia3	L235F	SNP	15		TRUE			RNNFFLSFKKLDGAI	TRUE	SFKKLDGAI	9	H2-Kd	0.3651	SLKKLDGAI	SFKKLDGAILWIPAF	0.3107	1909.67	922.667	905.333	477.333	667.667	240.5	2408.33	1204.33	1245.67	498.333	920.333	1416.17	1284.39	-131.778	976.533	1255.4	498.667	281.667	340.333	21	252.667	414.948	595.235	1150.2	247.634	0	505.092	465.943	-39.1485	172.271	248.931	78	156
Abcc4	I1140K	WT	15		TRUE			DPRTDELIQQKIREK	TRUE	IQQKIREKF	9	H2-Kd	0.1663	KQQKIREKF	DPRTDELIQQKIREK	0.2024	1291	894	894.333	545	1044.33	313	2539	1368.67	2111.33	688.333	2344.33	1092.5	1406.89	314.389	933.733	1810.33	1248	474.667	1217	143.333	1300	1260.65	0	704.649	0	0	630.324	234.883	-395.441	549.832	306.334	183.876	794.322
Cyp26a1	L316I	WT	15		TRUE			ATSLITYLGLYPHVL	TRUE	TYLGLYPHVL	10	H2-Kd	0.6116	TYIGLYPHVL	HETTASAATSLITYL	0.3563	479	288.333	219	212.667	232.333	220.333	274.667	263.667	359	197	275	383.667	252.889	-130.778	286.267	273.867	-204.333	-24.6667	140	-15.6667	42.6667	0	0	1431.78	52.7953	0	0	494.859	494.859	390.659	285.378	78	1160.4
Gzmc	P33S	WT	15		TRUE			EISPHSRPYMAYYEF	TRUE	RPYMAYYEF	9	H2-Ld	0.7363	SYMAYYEFL	PHSRPYMAYYEFLKV	0.2381	1739.33	1091.33	1830.33	1980.67	2105	3026.33	1652.33	1424	2539.67	1541.33	2770.67	1415.33	2034.22	618.889	1749.33	1985.6	-87	332.667	709.333	-439.333	665.667	0	426.626	720.209	202.077	0	213.313	307.429	94.1157	395.101	236.106	78	458.666
Olfr618	A290T	WT	15		TRUE			LYVVVPPALNPIIYG	TRUE	LYVVVPPAL	9	H2-Kd	0.4628	LYVVVPPTL	HILFANLYVVVPPAL	0.2941	1045.33	1331.33	1063.67	379.667	507	578.667	702	903.667	1063.67	538	655	1188.33	728.111	-460.222	865.4	772.467	-343.333	-427.667	0	158.333	148	0	984.82	1683.16	535.858	0	492.41	739.673	247.263	156	224.586	78	178.476
Qars	E530D	WT	15		TRUE			RRRGFPPEAINNFCA	TRUE	FPPEAINNF	9	H2-Ld	0.3001	RGFPPDAI	EAINNFCARVGVTVA	0.3257	1751	1588.67	1545.67	797.5	1936.33	594.5	5420.67	1912.33	3255	977	2580	1669.83	2642.5	972.667	1523.83	2829	3669.67	323.667	1709.33	179.5	643.667	0	0	1164.24	0	0	0	388.08	388.08	385.729	239.238	78	156
St8sia3	L235F	WT	15		TRUE			RNNFFLSLKKLDGAI	TRUE	FFLSLKKL	8	H2-Kd	0.2701	SFKKLDGAI	LKKLDGAILWIPAFF	0.3079	1738.67	779.667	665.667	430	570	241.5	2192.67	815	1132.33	435	920.333	1259.17	1083.06	-176.111	836.8	1099.07	454	35.3333	466.667	5	350.333	0	603.945	2012.88	798.849	0	301.972	937.243	635.271	159.843	239.508	78	156
Dusp1	C24R	SNP	15	TRUE	TRUE			LREGAAQRLLLDCRS		RLLLDCRSFF	10	H2-Kd	0.2344		GGLRALLREGAAQRL	0.4493	2818	1954.67	2986.67	1083	1922	933	14931.3	2150	3796.67	1146.33	2994.67	2386.33	6004.78	3618.44	2152.87	5003.8	12113.3	195.333	810	63.3333	1072.67	#N/A	#N/A	#N/A	#N/A	#N/A	#N/A	#N/A	#N/A	#N/A	#N/A	#N/A	#N/A
Flnb	L500Q	SNP	15	TRUE	TRUE			GPKGLEEQVKQKGFL		KGPKGLEEQV	10	H2-Kd	0.1496		EEQVKQKGFLDGVYS	0.1856	3401.33	5155.33	2634	3638	3076	1621.5	21886	4590.33	4739.67	4418.33	7838.33	4278.33	9365.94	5087.61	3580.93	8694.53	18484.7	-565	2105.67	780.333	4762.33	#N/A	#N/A	#N/A	#N/A	#N/A	#N/A	#N/A	#N/A	#N/A	#N/A	#N/A	#N/A
Gli2	N980K	SNP	15	TRUE	TRUE			FHSTHNMKPGSLPPC		STHNMKPGSL	10	H2-Kd	0.1996		HSTHNMKPGSLPPCA	0.3017	4816.67	7019	6745	6609	4868.33	3044	26034.3	8297.33	7193.67	7636.33	8371	5917.83	12458.6	6540.72	6011.6	11506.5	21217.7	1278.33	448.667	1027.33	3502.67	#N/A	#N/A	#N/A	#N/A	#N/A	#N/A	#N/A	#N/A	#N/A	#N/A	#N/A	#N/A
Gprc5a	F119L	SNP	15	TRUE		TRUE	CD8	SCLLAHALNLIKLVR		CFSCLLAHAL	10	H2-Kd	0.3258		LLAHALNLIKLVRGR	0.3264	1503	876	872.333	551.333	720.667	316	1825.67	983	1119.33	532.333	1055.33	1189.5	1041.56	-147.944	904.667	1103.13	322.667	107	247	-19	334.667	#N/A	#N/A	#N/A	#N/A	#N/A	#N/A	#N/A	#N/A	#N/A	#N/A	#N/A	#N/A
Itprip	A15G	SNP	15	TRUE	TRUE			VCLVVVTGIINHPLL		TGIINHPLL	9	H2-Dd	0.3824		MELFRVCLVVVTGII	0.2689	1894.67	961.667	1504.67	681	1950.67	650.5	4025.67	1249	2202	1145	2652.33	1428.17	1975.06	546.889	1398.53	2254.8	2131	287.333	697.333	464	701.667	#N/A	#N/A	#N/A	#N/A	#N/A	#N/A	#N/A	#N/A	#N/A	#N/A	#N/A	#N/A
Mrpl22	A98V	SNP	15	TRUE	TRUE			MSIDQALVQLEFNDK		RGMSIDQALV	10	H2-Kd	0.2389		AKMIRGMSIDQALVQ	0.3311	557.667	317.333	488.667	262.333	672.667	218	546	756.333	1287.33	426.667	1116.33	437.5	506.778	69.2778	459.733	826.533	-11.6667	439	798.667	164.333	443.667	#N/A	#N/A	#N/A	#N/A	#N/A	#N/A	#N/A	#N/A	#N/A	#N/A	#N/A	#N/A
Myh14	R1415P	SNP	15	TRUE	TRUE			LEAGEEAPRRAAREA		APRRAAREA	9	H2-Ld	0.0853		PRRAAREAETLTQRL	0.3252	977.333	456	688	400.667	915.333	311	1050.67	788.667	1653	608.333	1915	716.667	716.778	0.111111	687.467	1203.13	73.3333	332.667	965	207.667	999.667	#N/A	#N/A	#N/A	#N/A	#N/A	#N/A	#N/A	#N/A	#N/A	#N/A	#N/A	#N/A
Scrn1	C89G	SNP	15	TRUE	TRUE			GANEHGVGIANEAIN		VGIANEAI	8	H2-Kd	0.3455		ANEHGVGIANEAINA	0.1844	476.333	345.333	561.333	307.333	706.667	498.333	708	882.333	1254.33	494.333	1460.33	410.833	696.222	285.389	479.4	959.867	231.667	537	693	187	753.667	#N/A	#N/A	#N/A	#N/A	#N/A	#N/A	#N/A	#N/A	#N/A	#N/A	#N/A	#N/A
Vars	G821S	SNP	15	TRUE	TRUE			PGTLLETSHDILFFW		TSHDILFF	8	H2-Dd	0.1751		SHDILFFWVARMVML	0.1233	678.667	449.333	614	285	597	227	1221.67	893	1525	393.667	1549	564	780.556	216.556	524.8	1116.47	543	443.667	911	108.667	952	#N/A	#N/A	#N/A	#N/A	#N/A	#N/A	#N/A	#N/A	#N/A	#N/A	#N/A	#N/A
Dusp1	C24R	WT	15	TRUE	TRUE			LREGAAQCLLLDCRS		CLLLDCRSFF	10	H2-Kd	0.1582		GGLRALLREGAAQCL	0.3418	1551	960.667	1224	558.667	1305.33	433	2916.33	1278.33	2080.67	762	2096	1255.83	1542.56	286.722	1119.93	1826.67	1365.33	317.667	856.667	203.333	790.667	#N/A	#N/A	#N/A	#N/A	#N/A	#N/A	#N/A	#N/A	#N/A	#N/A	#N/A	#N/A
Flnb	L500Q	WT	15	TRUE	TRUE			GPKGLEELVKQKGFL		KGPKGLEEL	9	H2-Kd	0.2389		KGPKGLEELVKQKGF	0.1889	3054	5201.67	3448.67	2478	2785	1138	23483.7	4440.67	6599	2919.67	6062	4127.83	9687.44	5559.61	3393.47	8701	20429.7	-761	3150.33	441.667	3277	#N/A	#N/A	#N/A	#N/A	#N/A	#N/A	#N/A	#N/A	#N/A	#N/A	#N/A	#N/A
Gli2	N980K	WT	15	TRUE	TRUE			FHSTHNMNPGSLPPC		THNMNPGSL	9	H2-Kd	0.2925		HSTHNMNPGSLPPCA	0.2113	4398	6390.33	5710.67	4222	3942	2015	21384.3	6182.33	6619.33	6756	10472.7	5394.17	9860.56	4466.39	4932.6	10282.9	16986.3	-208	908.667	2534	6530.67	#N/A	#N/A	#N/A	#N/A	#N/A	#N/A	#N/A	#N/A	#N/A	#N/A	#N/A	#N/A
Gprc5a	F119L	WT	15	TRUE		TRUE	CD8	SCLLAHAFNLIKLVR		CLLAHAFNLI	10	H2-Kd	0.2705		AHAFNLIKLVRGRKP	0.2618	1437.67	857.667	823	498	682.333	345.5	2426	1196.5	1466.33	521.333	1021	1147.67	1322.67	175	859.733	1326.23	988.333	338.833	643.333	23.3333	338.667	#N/A	#N/A	#N/A	#N/A	#N/A	#N/A	#N/A	#N/A	#N/A	#N/A	#N/A	#N/A
Itprip	A15G	WT	15	TRUE	TRUE			VCLVVVTAIINHPLL		TAIINHPL	8	H2-Ld	0.2802		MAMELFRVCLVVVTA	0.3038	1586.67	817.667	1175	634	1998.33	671	2852.67	1152	2101	969	2255.33	1202.17	1558.56	356.389	1242.33	1866	1266	334.333	926	335	257	#N/A	#N/A	#N/A	#N/A	#N/A	#N/A	#N/A	#N/A	#N/A	#N/A	#N/A	#N/A
Mrpl22	A98V	WT	15	TRUE	TRUE			MSIDQALAQLEFNDK		QALAQLEF	8	H2-Ld	0.186		AKMIRGMSIDQALAQ	0.3494	477.333	299	531.333	323.667	643	267	505.333	796.667	1102.33	457.333	1300.67	388.167	523	134.833	454.867	832.467	28	497.667	571	133.667	657.667	#N/A	#N/A	#N/A	#N/A	#N/A	#N/A	#N/A	#N/A	#N/A	#N/A	#N/A	#N/A
Myh14	R1415P	WT	15	TRUE	TRUE			LEAGEEARRRAAREA		RRRAAREAETL	11	H2-Kd	0.188		ARRRAAREAETLTQR	0.3711	1849	830.333	1162.33	1320	1729.67	1308.33	2335.67	1280.67	2330.67	1309.67	3806.67	1339.67	1641.56	301.889	1378.27	2212.67	486.667	450.333	1168.33	-10.3333	2077	#N/A	#N/A	#N/A	#N/A	#N/A	#N/A	#N/A	#N/A	#N/A	#N/A	#N/A	#N/A
Scrn1	C89G	WT	15	TRUE	TRUE			GANEHGVCIANEAIN		VCIANEAI	8	H2-Kd	0.2374		ANEHGVCIANEAINA	0.1693	1118	617.333	755.333	335.667	729.667	180.5	1654.33	967.333	1539	489	1803.33	867.667	934.056	66.3889	711.2	1290.6	536.333	350	783.667	153.333	1073.67	#N/A	#N/A	#N/A	#N/A	#N/A	#N/A	#N/A	#N/A	#N/A	#N/A	#N/A	#N/A
Vars	G821S	WT	15	TRUE	TRUE			PGTLLETGHDILFFW		TGHDILFF	8	H2-Dd	0.2008		GHDILFFWVARMVML	0.1231	729.333	435	551.667	251.667	555	175	1176	769.333	1229.67	422	1225.33	582.167	706.778	124.611	504.533	964.467	446.667	334.333	678	170.333	670.333	#N/A	#N/A	#N/A	#N/A	#N/A	#N/A	#N/A	#N/A	#N/A	#N/A	#N/A	#N/A
Abca13	Q4266H	SNP	15		TRUE			LLRKFRDHDPVCADA		KFRDHDPV	8	H2-Kd	0.1608		FRDHDPVCADAFRMN	0.4287	4082.67	4788.67	9626.33	9114.67	7520.67	4175.5	28057.7	6999.67	10127.3	5058.33	8145.33	4435.67	13077.6	8641.94	7026.6	11677.7	23975	2211	501	-4056.33	624.667	#N/A	#N/A	#N/A	#N/A	#N/A	#N/A	#N/A	#N/A	#N/A	#N/A	#N/A	#N/A
Actn2	N68K	SNP	15		TRUE			NIEEDFRKGLKLMLL		KGLKLMLL	8	H2-Kd	0.2598		RKGLKLMLLLEVISG	0.385	2661.67	1993.33	2460.67	809.333	1873	2333	13075.3	2155	4195	1017.67	2768.67	2327.5	5854.44	3526.94	1959.6	4642.33	10413.7	161.667	1734.33	208.333	895.667	#N/A	#N/A	#N/A	#N/A	#N/A	#N/A	#N/A	#N/A	#N/A	#N/A	#N/A	#N/A
Adam24	A730P	SNP	15		TRUE			KKSREAAPSQPAEER		APSQPAEERV	10	H2-Ld	0.1115		GATKKSREAAPSQPA	0.2613	1103	572.333	648	629.667	987.667	312.5	1371.67	1071.67	1917.33	683.333	2595.33	837.667	918.611	80.9444	788.133	1527.87	268.667	499.333	1269.33	53.6667	1607.67	#N/A	#N/A	#N/A	#N/A	#N/A	#N/A	#N/A	#N/A	#N/A	#N/A	#N/A	#N/A
Adamts9	I623L	SNP	15			TRUE	CD4	GFSSFQKLRLDLTSM		SFQKLRLDL	9	H2-Kd	0.3315		QKLRLDLTSMQIITT	0.3452	1275.33	723.667	941.667	521.333	976.333	933.667	4926.33	1290	2385.67	628.333	1459.33	999.5	2383.33	1383.83	887.667	2137.93	3651	566.333	1444	107	483	#N/A	#N/A	#N/A	#N/A	#N/A	#N/A	#N/A	#N/A	#N/A	#N/A	#N/A	#N/A
B3galnt1	D267V	SNP	15		TRUE			VKPIKFEVVYVGICL		KPIKFEVVYV	10	H2-Ld	0.3077		YEMMSHVKPIKFEVV	0.2184	773.333	535.333	736.333	322	660.667	286.333	1014.67	904.333	1365.33	458	935.333	654.333	735.111	80.7778	605.533	935.533	241.333	369	629	136	274.667	#N/A	#N/A	#N/A	#N/A	#N/A	#N/A	#N/A	#N/A	#N/A	#N/A	#N/A	#N/A
Bmp4	H51Y	SNP	15		TRUE			GRRSGQSYELLRDFE		SGQSYELL	8	H2-Dd	0.2777		QSYELLRDFEATLLQ	0.2132	1026	694	845.333	436.667	811.667	182.5	1851	1037.33	1976.67	512.333	1493	860	1023.61	163.611	762.733	1374.07	825	343.333	1131.33	75.6667	681.333	#N/A	#N/A	#N/A	#N/A	#N/A	#N/A	#N/A	#N/A	#N/A	#N/A	#N/A	#N/A
Cep120	H68N	SNP	15		TRUE	TRUE	CD4	DRKVLHQNRLQRTPI		HQNRLQRTPI	10	H2-Kd	0.3916		QNRLQRTPIKLQCFA	0.4676	2747.33	2525.33	2112.33	1777.67	2660.33	1966.67	12650.3	3202.67	3609	1324	2796.33	2636.33	5939.89	3303.56	2364.6	4716.47	9903	677.333	1496.67	-453.667	136	#N/A	#N/A	#N/A	#N/A	#N/A	#N/A	#N/A	#N/A	#N/A	#N/A	#N/A	#N/A
Chd2	D1357G	SNP	15		TRUE			NKAPRLKGEHGLEPA		APRLKGEHGL	10	H2-Ld	0.1941		RVKKENKAPRLKGEH	0.1983	2395	2161.67	1608	2530.67	2181.33	764	10806.3	2303	3047	2098.33	3914.33	2278.33	4624.44	2346.11	2175.33	4433.8	8411.33	141.333	1439	-432.333	1733	#N/A	#N/A	#N/A	#N/A	#N/A	#N/A	#N/A	#N/A	#N/A	#N/A	#N/A	#N/A
Cpxm1	L625I	SNP	15		TRUE			VRDKDTEIGIADAVI		IGIADAVI	8	H2-Kd	0.2442		DKDTEIGIADAVIAV	0.3425	755	470.333	564.333	287.667	604.667	227.5	1115.67	936	1534.33	418.333	1429	612.667	759.722	147.056	536.4	1086.67	360.667	465.667	970	130.667	824.333	#N/A	#N/A	#N/A	#N/A	#N/A	#N/A	#N/A	#N/A	#N/A	#N/A	#N/A	#N/A
Ctsg	S133T	SNP	15		TRUE			PVALPQATKKLQPGD		LPQATKKL	8	H2-Ld	0.3784		RRSGSVKPVALPQAT	0.554	3321	6333.67	4569.33	3919	3176	1375.5	19254.3	5278.67	5676	4909.33	4963	4827.33	8636.17	3808.83	4263.8	8016.27	15933.3	-1055	1106.67	990.333	1787	#N/A	#N/A	#N/A	#N/A	#N/A	#N/A	#N/A	#N/A	#N/A	#N/A	#N/A	#N/A
Cyp2c39	S99G	SNP	15		TRUE			EEFSDRGGIPMVEKI		GGIPMVEKI	9	H2-Kd	0.3029		EEFSDRGGIPMVEKI	0.1642	1614.33	1056.33	1272	858	1058.67	374	3565	1726.67	2354.67	986	2937.67	1335.33	1888.56	553.222	1171.87	2314	1950.67	670.333	1082.67	128	1879	#N/A	#N/A	#N/A	#N/A	#N/A	#N/A	#N/A	#N/A	#N/A	#N/A	#N/A	#N/A
Dmrta2	R73G	SNP	15			TRUE	CD4	TPKCARCGNHGVVSA		CGNHGVVSAL	10	H2-Kd	0.2827		CGNHGVVSALKGHKR	0.3057	1815.67	1521.67	1682.33	1043.33	1891.33	803.5	10398	2209	3366	1278	2572.67	1668.67	4470.17	2801.5	1590.87	3964.73	8582.33	687.333	1683.67	234.667	681.333	#N/A	#N/A	#N/A	#N/A	#N/A	#N/A	#N/A	#N/A	#N/A	#N/A	#N/A	#N/A
Enho	L10I	SNP	15		TRUE	TRUE	CD4	AAISQGAIIAIVCNG		MGAAISQGAI	10	H2-Kd	0.2843		MGAAISQGAIIAIVC	0.326	852	523.333	777	313.333	731	249.5	1286	935.333	1849.67	439.667	1896	687.667	823.611	135.944	639.333	1281.33	434	412	1072.67	126.333	1165	#N/A	#N/A	#N/A	#N/A	#N/A	#N/A	#N/A	#N/A	#N/A	#N/A	#N/A	#N/A
Fmo2	F69L	SNP	15		TRUE			TSKEMSCLSDFPMPE		KEMSCLSDF	9	H2-Kd	0.2846		NTSKEMSCLSDFPMP	0.3965	1325	924.333	1644	619	1026.33	416	3237.33	1468.33	2552.33	870	3287	1124.67	1707.22	582.556	1107.73	2283	1912.33	544	908.333	251	2260.67	#N/A	#N/A	#N/A	#N/A	#N/A	#N/A	#N/A	#N/A	#N/A	#N/A	#N/A	#N/A
Ggt7	W222R	SNP	15		TRUE			EEALQRSRDTKPGLL		RSRDTKPGLL	10	H2-Kd	0.1275		SAPGALREEALQRSR	0.3978	2074.33	1319	1496.33	1147.33	1645.67	575	4786	1708.33	2781.67	1317	4248.67	1696.67	2356.44	659.778	1536.53	2968.33	2711.67	389.333	1285.33	169.667	2603	#N/A	#N/A	#N/A	#N/A	#N/A	#N/A	#N/A	#N/A	#N/A	#N/A	#N/A	#N/A
Glycam1	T45I	SNP	15		TRUE			PAAQSTPISYTSEES		IPAAQSTPI	9	H2-Ld	0.4078		DAIPAAQSTPISYTS	0.3166	1145.33	693.333	906	339.333	705	181.5	1842.67	1190.33	1738.33	537	1855	919.333	1071.5	152.167	757.8	1432.67	697.333	497	832.333	197.667	1150	#N/A	#N/A	#N/A	#N/A	#N/A	#N/A	#N/A	#N/A	#N/A	#N/A	#N/A	#N/A
Hpcal4	A61V	SNP	15		TRUE			KFFPYGDVSKFAQHA		FPYGDVSKF	9	H2-Ld	0.3655		EFQQLYIKFFPYGDV	0.1833	3541.33	4679.33	4989.67	8315.67	5020.33	1947.5	21815.3	6732.67	6304.67	5119.33	6409.33	4110.33	10165.2	6054.83	5309.27	9276.27	18274	2053.33	1315	-3196.33	1389	#N/A	#N/A	#N/A	#N/A	#N/A	#N/A	#N/A	#N/A	#N/A	#N/A	#N/A	#N/A
Isoc1	V205L	SNP	15		TRUE			IPGVRSVLLFGVETH		IPGVRSVLLF	10	H2-Ld	0.465		VEAALAEIPGVRSVL	0.4305	1146.33	849.667	856.333	348.333	867.667	358	2821.33	1409	2064	567	1781.33	998	1529.44	531.444	813.667	1728.53	1675	559.333	1207.67	218.667	913.667	#N/A	#N/A	#N/A	#N/A	#N/A	#N/A	#N/A	#N/A	#N/A	#N/A	#N/A	#N/A
Kbtbd2	T91R	SNP	15		TRUE	TRUE	CD4	MIIAYAYRGNLAVND		AYAYRGNL	8	H2-Kd	0.5157		DAAALQMIIAYAYRG	0.5273	1226.67	803.333	865	674	951.333	421.5	2061.67	1372.33	2224	639.667	1775.67	1015	1285.17	270.167	904.067	1614.67	835	569	1359	-34.3333	824.333	#N/A	#N/A	#N/A	#N/A	#N/A	#N/A	#N/A	#N/A	#N/A	#N/A	#N/A	#N/A
Kif2b	G454R	SNP	15		TRUE			DLAGNERRADTAKAT		AGNERRADTA	10	H2-Kd	0.0537		AGNERRADTAKATRK	0.323	1207.67	655.667	790.667	440	805.333	264	1824.33	1106.67	1536	568.333	1553.33	931.667	1065	133.333	779.867	1317.73	616.667	451	745.333	128.333	748	#N/A	#N/A	#N/A	#N/A	#N/A	#N/A	#N/A	#N/A	#N/A	#N/A	#N/A	#N/A
Lhx4	A31S	SNP	15		TRUE			MQQIPQCSGCNQHIL		IPQCSGCNQHI	11	H2-Ld	0.3862		SGCNQHILDKFILKV	0.2916	2593	3892.67	6716	2363	3382.33	1903.5	21972	5215	6348	2778.33	5470	3242.83	9696.83	6454	3789.4	8356.67	19379	1322.33	-368	415.333	2087.67	#N/A	#N/A	#N/A	#N/A	#N/A	#N/A	#N/A	#N/A	#N/A	#N/A	#N/A	#N/A
Lyst	S850F	SNP	15		TRUE			DIQQELPFLSVGPSL		LPFLSVGPSL	10	H2-Ld	0.4985		LDIQQELPFLSVGPS	0.2568	1298.67	912	1089.33	494.333	1226	485	2146	1094.33	2121.67	1187.67	2627.33	1105.33	1241.78	136.444	1004.07	1835.4	847.333	182.333	1032.33	693.333	1401.33	#N/A	#N/A	#N/A	#N/A	#N/A	#N/A	#N/A	#N/A	#N/A	#N/A	#N/A	#N/A
Malt1	T534A	SNP	15			TRUE	CD4	LLEDKKIAVLLDEVA		RLLEDKKIAVL	11	H2-Kd	0.1889		RLLEDKKIAVLLDEV	0.3074	988.333	558	795	302	705.333	253	1622.33	1022	1916.67	495	1179	773.167	965.778	192.611	669.733	1247	634	464	1121.67	193	473.667	#N/A	#N/A	#N/A	#N/A	#N/A	#N/A	#N/A	#N/A	#N/A	#N/A	#N/A	#N/A
Mc3r	A214G	SNP	15		TRUE			YIHMFLFGRLHVQRI		LYIHMFLFGRL	11	H2-Kd	0.5067		FGRLHVQRIAVLPPA	0.5901	3548	1981.67	1513.67	807	1388	425	4995.33	2459	1919.33	826	1639.67	2764.83	2626.44	-138.389	1847.67	2367.87	1447.33	477.333	405.667	19	251.667	#N/A	#N/A	#N/A	#N/A	#N/A	#N/A	#N/A	#N/A	#N/A	#N/A	#N/A	#N/A
Mrgprd	S28T	SNP	15		TRUE			LVTWIYFTVTFLAMA		IYFTVTFL	8	H2-Kd	0.6255		TVTFLAMATCVGGMA	0.4248	645	324.333	439	241.333	604.333	546	533.667	852.667	1498	457.333	1091.33	484.667	644.111	159.444	450.8	886.6	-111.333	528.333	1059	216	487	#N/A	#N/A	#N/A	#N/A	#N/A	#N/A	#N/A	#N/A	#N/A	#N/A	#N/A	#N/A
Nlrp14	S155R	SNP	15		TRUE			EQVLSKPRSLLFIID		KPRSLLFII	9	H2-Ld	0.365		SSEGPIEQVLSKPRS	0.2592	690.667	458	617	260	596.333	147	1251	799	1477.33	526.667	936.333	574.333	732.333	158	524.4	998.067	560.333	341	860.333	266.667	340	#N/A	#N/A	#N/A	#N/A	#N/A	#N/A	#N/A	#N/A	#N/A	#N/A	#N/A	#N/A
Olfr1057	N307S	SNP	15		TRUE			ALKEFLKSPCKRFNL		SPCKRFNL	8	H2-Ld	0.3889		RNKDVKCALKEFLKS	0.2159	2667.67	3610.67	3717.33	2404	3490.67	531.5	16385.7	4305.67	3840.33	1344	3368.67	3139.17	7074.28	3935.11	3178.07	5848.87	13718	695	123	-1060	-122	#N/A	#N/A	#N/A	#N/A	#N/A	#N/A	#N/A	#N/A	#N/A	#N/A	#N/A	#N/A
Olfr1216	K20R	SNP	15		TRUE			LGLSQNPRIEKILFV		SQNPRIEKI	9	H2-Kd	0.3725		SVTEFIILGLSQNPR	0.1542	588	336.333	394.667	272	591.667	185	579.667	699.333	1155.33	389.333	1352.33	462.167	488	25.8333	436.533	835.2	-8.33333	363	760.667	117.333	760.667	#N/A	#N/A	#N/A	#N/A	#N/A	#N/A	#N/A	#N/A	#N/A	#N/A	#N/A	#N/A
Olfr1278	M208V	SNP	15		TRUE			ANSGFISVGTFLLLI		GFISVGTFL	9	H2-Kd	0.4133		TANSGFISVGTFLLL	0.2829	1742.67	1307.67	670.667	419.667	1317.67	193	6545.33	1286.67	1351.67	658.667	1776.67	1525.17	2675	1149.83	1091.67	2323.8	4802.67	-21	681	239	459	#N/A	#N/A	#N/A	#N/A	#N/A	#N/A	#N/A	#N/A	#N/A	#N/A	#N/A	#N/A
Olfr50	M146V	SNP	15		TRUE			SLCVLLVVVSWAFSS		SQSLCVLLVVV	11	H2-Kd	0.1853		MSQSLCVLLVVVSWA	0.3349	881.333	512.667	813	311.333	577.333	255	1288	935	1585.33	478.333	1205	697	826	129	619.133	1098.33	406.667	422.333	772.333	167	627.667	#N/A	#N/A	#N/A	#N/A	#N/A	#N/A	#N/A	#N/A	#N/A	#N/A	#N/A	#N/A
Olfr635	Q65H	SNP	15		TRUE			RTEPSLHHPMYLFLS		HPMYLFLSM	9	H2-Ld	0.696		SLHHPMYLFLSMLAL	0.3216	2980	2554.33	2953.33	2421.33	2117.33	1113	6532	2705.67	3810	1588.33	2344.33	2767.17	3450.22	683.056	2605.27	3396.07	3552	151.333	856.667	-833	227	#N/A	#N/A	#N/A	#N/A	#N/A	#N/A	#N/A	#N/A	#N/A	#N/A	#N/A	#N/A
Olfr77	A300S	SNP	15		TRUE			RNKDVKGSLVRLLRR		KGSLVRLL	8	H2-Kd	0.1876		NKDVKGSLVRLLRRV	0.2808	2680	3262	3804.67	1533	1993	707.5	13023.3	2756	3221	1114	2585.67	2971	5495.61	2524.61	2654.53	4540	10343.3	-506	-583.667	-419	592.667	#N/A	#N/A	#N/A	#N/A	#N/A	#N/A	#N/A	#N/A	#N/A	#N/A	#N/A	#N/A
Olfr862	F161V	SNP	15		TRUE			MNSLVHYVIVSQLKF		SYMNSLVHYVI	11	H2-Kd	0.823		SYMNSLVHYVIVSQL	0.2983	959.667	470.667	680.333	370.333	907.333	830	973.667	985.333	1833.67	586	1889	715.167	929.667	214.5	677.667	1253.53	14	514.667	1153.33	215.667	981.667	#N/A	#N/A	#N/A	#N/A	#N/A	#N/A	#N/A	#N/A	#N/A	#N/A	#N/A	#N/A
Olfr881	C101Y	SNP	15		TRUE			NIISHAEYMTQLFFF		SHAEYMTQL	9	H2-Kd	0.3652		LVSFVKQNIISHAEY	0.2709	631.333	426.333	633.333	398.667	689.333	569.333	942.333	937	1312.67	498.333	1406.67	528.833	816.222	287.389	555.8	1019.4	311	510.667	679.333	99.6667	717.333	#N/A	#N/A	#N/A	#N/A	#N/A	#N/A	#N/A	#N/A	#N/A	#N/A	#N/A	#N/A
Olfr938	N42K	SNP	15		TRUE			YLVTVVGKLGMIVLI		VYLVTVVGKL	10	H2-Kd	0.4694		VGKLGMIVLILISSQ	0.3331	832.667	518	537.333	257	511	272	1711.33	823.333	1394	443.333	759.667	675.333	935.556	260.222	531.2	1026.33	878.667	305.333	856.667	186.333	248.667	#N/A	#N/A	#N/A	#N/A	#N/A	#N/A	#N/A	#N/A	#N/A	#N/A	#N/A	#N/A
Olfr979	T75K	SNP	15		TRUE			DMWFSTVKVPKMLMT		KVPKMLMTL	9	H2-Kd	0.2567		VKVPKMLMTLVSPRG	0.4229	8084	15433.3	16955.7	10681.3	7449	3325	35589.7	18146	16486.3	10728.3	11077.3	11758.7	19020.2	7261.56	11720.7	18405.5	27505.7	2712.67	-469.333	47	3628.33	#N/A	#N/A	#N/A	#N/A	#N/A	#N/A	#N/A	#N/A	#N/A	#N/A	#N/A	#N/A
Pzp	G1199E	SNP	15			TRUE	CD8	SLHWQRPEDVQKVKA		RPEDVQKVKAL	11	H2-Ld	0.2087		WQRPEDVQKVKALSF	0.3696	3395.67	4311.67	3481	3916.5	3032.67	2153	15731	5128.67	4882.33	5786	6934	3853.67	7670.89	3817.22	3627.5	7692.4	12335.3	817	1401.33	1869.5	3901.33	#N/A	#N/A	#N/A	#N/A	#N/A	#N/A	#N/A	#N/A	#N/A	#N/A	#N/A	#N/A
Rragd	L268P	SNP	15			TRUE	CD4	HQTSAPSPKALAHNG		HQTSAPSPKAL	11	H2-Kd	0.2153		HRSCSHQTSAPSPKA	0.3035	2877.67	1876.67	1942.33	1173	2399.33	1174.5	8890.67	2546.67	3504.33	1954.67	3645.67	2377.17	4203.94	1826.78	2053.8	4108.4	6013	670	1562	781.667	1246.33	#N/A	#N/A	#N/A	#N/A	#N/A	#N/A	#N/A	#N/A	#N/A	#N/A	#N/A	#N/A
Slc19a3	F185L	SNP	15		TRUE			LACVSVALFFSLFLP		VSVALFFSLF	10	H2-Dd	0.3682		SSLFYISLACVSVAL	0.4408	458	294	329.333	172.333	408.333	164.5	747.667	613	753	267.667	606	376	508.389	132.389	332.4	597.467	289.667	319	423.667	95.3333	197.667	#N/A	#N/A	#N/A	#N/A	#N/A	#N/A	#N/A	#N/A	#N/A	#N/A	#N/A	#N/A
Slc6a2	V307E	SNP	15		TRUE			YRLKEATEWIDAATQ		FYRLKEATEWI	11	H2-Kd	0.4849		EWIDAATQIFFSLGA	0.2466	1033.33	721.333	1172.67	459.667	889.333	296.5	2220.67	1161	1949.67	667.667	2154	877.333	1226.06	348.722	855.267	1630.6	1187.33	439.667	777	208	1264.67	#N/A	#N/A	#N/A	#N/A	#N/A	#N/A	#N/A	#N/A	#N/A	#N/A	#N/A	#N/A
Sostdc1	N112K	SNP	15		TRUE			LPLPVLPKWIGGGYG		LPLPVLPKWI	10	H2-Ld	0.2939		VCAGECLPLPVLPKW	0.3649	12893	21012.7	28286	14300.3	14129	8500.5	41977	23018.3	19243.7	15590.7	16289	16952.8	24498.6	7545.78	18124.2	23223.7	29084	2005.67	-9042.33	1290.33	2160	#N/A	#N/A	#N/A	#N/A	#N/A	#N/A	#N/A	#N/A	#N/A	#N/A	#N/A	#N/A
Spam1	I144S	SNP	15		TRUE			DKLGLAISDWEEWRP		LGLAISDWEEW	11	H2-Dd	0.1499		HYIPDDKLGLAISDW	0.141	1354.67	1216.33	1847	558.333	1244	368.5	3748.33	1816.67	2553	789	3925	1285.5	1977.83	692.333	1244.07	2566.4	2393.67	600.333	706	230.667	2681	#N/A	#N/A	#N/A	#N/A	#N/A	#N/A	#N/A	#N/A	#N/A	#N/A	#N/A	#N/A
Sult2a1	Q262H	SNP	15		TRUE			KNHFTVAHAEAFDKV		FTVAHAEAF	9	H2-Dd	0.2284		KNHFTVAHAEAFDKV	0.2517	1132	687.333	922.667	690.667	1128.67	395.5	1727.33	1121	2278.67	825	3065	909.667	1081.28	171.611	912.267	1803.4	595.333	433.667	1356	134.333	1936.33	#N/A	#N/A	#N/A	#N/A	#N/A	#N/A	#N/A	#N/A	#N/A	#N/A	#N/A	#N/A
Sva	T41P	SNP	15		TRUE			HNEPRNYPLTLNMKI		NYPLTLNMKI	10	H2-Kd	0.4952		RNYPLTLNMKITPST	0.2455	3099.33	5345.67	7654.33	3644.33	4734.33	1781	20619	5011.67	6450.67	3881	6039	4222.5	9137.22	4914.72	4895.6	8400.27	17519.7	-334	-1203.67	236.667	1304.67	#N/A	#N/A	#N/A	#N/A	#N/A	#N/A	#N/A	#N/A	#N/A	#N/A	#N/A	#N/A
Taf4b	P561H	SNP	15		TRUE			TPVNAVMHTSKFPPS		MHTSKFPPSSI	11	H2-Kd	0.2706		NCGQKTPVNAVMHTS	0.3223	2644.67	1745.67	1704	1925.67	2387	661	4571.33	1861.67	3035.67	2897.67	3459.33	2195.17	2364.67	169.5	2081.4	3165.13	1926.67	116	1331.67	972	1072.33	#N/A	#N/A	#N/A	#N/A	#N/A	#N/A	#N/A	#N/A	#N/A	#N/A	#N/A	#N/A
Tcf3	S255N	SNP	15		TRUE			PLPLAPGNSSVGSGT		LPLAPGNSSV	10	H2-Ld	0.2925		GDGSSPLPLAPGNSS	0.1547	1493.33	890	912.667	723.667	1155.67	387	2696.33	1325.33	2166.67	925	2435	1191.67	1469.56	277.889	1035.07	1909.67	1203	435.333	1254	201.333	1279.33	#N/A	#N/A	#N/A	#N/A	#N/A	#N/A	#N/A	#N/A	#N/A	#N/A	#N/A	#N/A
Tmtc2	V201I	SNP	15		TRUE	TRUE	CD8	AVSAVYDIFVFHRLK		VSAVYDIF	8	H2-Dd	0.2958		IFVFHRLKMKQILPT	0.3984	2387.33	1361.67	1144.67	566.667	729.333	601.667	1753	1544.67	1718	588.667	1376	1874.5	1299.78	-574.722	1237.93	1396.07	-634.333	183	573.333	22	646.667	#N/A	#N/A	#N/A	#N/A	#N/A	#N/A	#N/A	#N/A	#N/A	#N/A	#N/A	#N/A
Usp43	R621W	SNP	15		TRUE			NMAPHVAWRSTNSKA		NMAPHVAW	8	H2-Kd	0.2983		LSGLNMAPHVAWRST	0.3522	2485.67	2981.33	3125.67	2206	2169	2387.5	10986.7	3670	4034.67	2529	3451	2733.5	5681.39	2947.89	2593.53	4934.27	8501	688.667	909	323	1282	#N/A	#N/A	#N/A	#N/A	#N/A	#N/A	#N/A	#N/A	#N/A	#N/A	#N/A	#N/A
Vmn1r9	V126D	SNP	15		TRUE			LKKYMVCDFLCIWSF		KYMVCDFL	8	H2-Kd	0.7196		LKKYMVCDFLCIWSF	0.3595	973	525	677.667	390.667	860.333	350	1081.33	1014.33	1902.67	528.333	2257	749	815.222	66.2222	685.333	1356.73	108.333	489.333	1225	137.667	1396.67	#N/A	#N/A	#N/A	#N/A	#N/A	#N/A	#N/A	#N/A	#N/A	#N/A	#N/A	#N/A
Zmynd12	R13C	SNP	15		TRUE			PLAVPKGCRLSCEVC		YPLAVPKGCRL	11	H2-Ld	0.5286		NVIYPLAVPKGCRLS	0.3012	2272.33	4079.33	2750.67	3485.33	2631.67	1072	10141	2387	4345	1657.33	3419.67	3175.83	4533.33	1357.5	3043.87	4390	7868.67	-1692.33	1594.33	-1828	788	#N/A	#N/A	#N/A	#N/A	#N/A	#N/A	#N/A	#N/A	#N/A	#N/A	#N/A	#N/A
Zzz3	K311N	SNP	15			TRUE	CD8	FKKLKKQNLQQMQAE		KLKKQNLQQM	10	H2-Kd	0.1674		NLQQMQAESGFVQHV	0.3434	1619	855.667	1226	1022	2031.33	662.5	4089	2256.33	2220	1539.33	2737.33	1237.33	2335.94	1098.61	1350.8	2568.4	2470	1400.67	994	517.333	706	#N/A	#N/A	#N/A	#N/A	#N/A	#N/A	#N/A	#N/A	#N/A	#N/A	#N/A	#N/A
Abca13	Q4266H	WT	15		TRUE			LLRKFRDQDPVCADA		KFRDQDPV	8	H2-Kd	0.1355		FRDQDPVCADAFRMN	0.3954	3027.67	4362	5566.67	5618	4098.33	1562.5	27847.3	5777	7410.33	3278.67	4787.67	3694.83	11728.9	8034.11	4534.53	9820.2	24819.7	1415	1843.67	-2339.33	689.333	#N/A	#N/A	#N/A	#N/A	#N/A	#N/A	#N/A	#N/A	#N/A	#N/A	#N/A	#N/A
Actn2	N68K	WT	15		TRUE			NIEEDFRNGLKLMLL		NGLKLMLL	8	H2-Dd	0.2105		NGLKLMLLLEVISGE	0.3783	1721.67	1602.67	1966	651.667	1393	399	12223	1623.33	3126.67	820	2656	1662.17	4748.44	3086.28	1467	4089.8	10501.3	20.6667	1160.67	168.333	1263	#N/A	#N/A	#N/A	#N/A	#N/A	#N/A	#N/A	#N/A	#N/A	#N/A	#N/A	#N/A
Adam24	A730P	WT	15		TRUE			KKSREAAASQPAEER		REAAASQPA	9	H2-Kd	0.0756		GATKKSREAAASQPA	0.3317	1406.33	884	984	577.667	1082.33	228.5	2772.67	1446	1950.33	742.333	2142	1145.17	1482.39	337.222	986.867	1810.67	1366.33	562	966.333	164.667	1059.67	#N/A	#N/A	#N/A	#N/A	#N/A	#N/A	#N/A	#N/A	#N/A	#N/A	#N/A	#N/A
Adamts9	I623L	WT	15			TRUE	CD4	GFSSFQKIRLDLTSM		AGFSSFQKI	9	H2-Kd	0.3855		QKIRLDLTSMQIITT	0.342	1258.33	899.667	1069.67	412.667	979.333	464	3961.67	1437.67	2624.33	601.333	1692.33	1079	1954.44	875.444	923.933	2063.47	2703.33	538	1554.67	188.667	713	#N/A	#N/A	#N/A	#N/A	#N/A	#N/A	#N/A	#N/A	#N/A	#N/A	#N/A	#N/A
B3galnt1	D267V	WT	15		TRUE			VKPIKFEDVYVGICL		KPIKFEDVYV	10	H2-Ld	0.262		YEMMSHVKPIKFEDV	0.2112	688.667	394	600.667	308	576.667	295.5	560.333	832.333	1076.67	430.667	1011	541.333	562.722	21.3889	513.6	782.2	-128.333	438.333	476	122.667	434.333	#N/A	#N/A	#N/A	#N/A	#N/A	#N/A	#N/A	#N/A	#N/A	#N/A	#N/A	#N/A
Bmp4	H51Y	WT	15		TRUE			GRRSGQSHELLRDFE		SGQSHELL	8	H2-Dd	0.2681		GQSHELLRDFEATLL	0.2307	1176.33	605.667	974.667	592	1146.33	862.333	1013.33	1113.33	1912.33	742.667	2412.67	891	996.333	105.333	899	1438.87	-163	507.667	937.667	150.667	1266.33	#N/A	#N/A	#N/A	#N/A	#N/A	#N/A	#N/A	#N/A	#N/A	#N/A	#N/A	#N/A
Cep120	H68N	WT	15		TRUE	TRUE	CD4	DRKVLHQHRLQRTPI		HQHRLQRTPI	10	H2-Kd	0.3958		QHRLQRTPIKLQCFA	0.4869	3176.67	2301.67	2348.67	1927.33	2753.67	1015	12024.7	3980.67	3871.67	1419	2899.67	2739.17	5673.44	2934.28	2501.6	4839.13	8848	1679	1523	-508.333	146	#N/A	#N/A	#N/A	#N/A	#N/A	#N/A	#N/A	#N/A	#N/A	#N/A	#N/A	#N/A
Chd2	D1357G	WT	15		TRUE			NKAPRLKDEHGLEPA		KAPRLKDEHGL	11	H2-Dd	0.1794		RVKKENKAPRLKDEH	0.1889	1584	1195	1339	1234	1536.33	558.5	4781.67	2011	2582.33	1203	3309.33	1389.5	2450.39	1060.89	1377.67	2777.47	3197.67	816	1243.33	-31	1773	#N/A	#N/A	#N/A	#N/A	#N/A	#N/A	#N/A	#N/A	#N/A	#N/A	#N/A	#N/A
Cpxm1	L625I	WT	15		TRUE			VRDKDTELGIADAVI		LGIADAVI	8	H2-Kd	0.1968		DKDTELGIADAVIAV	0.3413	880.333	375	533.667	276	618	189.5	842	755.333	1344.33	429.333	1340.33	627.667	595.611	-32.0556	536.6	942.267	-38.3333	380.333	810.667	153.333	722.333	#N/A	#N/A	#N/A	#N/A	#N/A	#N/A	#N/A	#N/A	#N/A	#N/A	#N/A	#N/A
Ctsg	S133T	WT	15		TRUE			PVALPQASKKLQPGD		LPQASKKL	8	H2-Ld	0.3667		RRSGSVKPVALPQAS	0.5541	2931.67	5117	2731.67	2634	3178.67	1417	13345	3320.33	4450	4699.67	4826.67	4024.33	6027.44	2003.11	3318.6	6128.33	10413.3	-1796.67	1718.33	2065.67	1648	#N/A	#N/A	#N/A	#N/A	#N/A	#N/A	#N/A	#N/A	#N/A	#N/A	#N/A	#N/A
Cyp2c39	S99G	WT	15		TRUE			EEFSDRGSIPMVEKI		GSIPMVEKI	9	H2-Kd	0.2267		EEFSDRGSIPMVEKI	0.2544	1139.33	500.667	657	665.667	985	419	968.667	950	2004.67	810.333	2855	820	779.222	-40.7778	789.533	1517.73	-170.667	449.333	1347.67	144.667	1870	#N/A	#N/A	#N/A	#N/A	#N/A	#N/A	#N/A	#N/A	#N/A	#N/A	#N/A	#N/A
Dmrta2	R73G	WT	15			TRUE	CD4	TPKCARCRNHGVVSA		RNHGVVSAL	9	H2-Kd	0.3766		CRNHGVVSALKGHKR	0.3842	2244.67	2407	2856	1864.33	2687.33	2118	14044.7	3607	4392	1354.67	3220.33	2325.83	6589.89	4264.06	2411.87	5323.73	11800	1200	1536	-509.667	533	#N/A	#N/A	#N/A	#N/A	#N/A	#N/A	#N/A	#N/A	#N/A	#N/A	#N/A	#N/A
Enho	L10I	WT	15		TRUE	TRUE	CD4	AAISQGALIAIVCNG		SQGALIAI	8	H2-Kd	0.3186		MGAAISQGALIAIVC	0.3441	795	565.333	587.667	228.667	611.667	246.5	1309.33	1187	1847.33	386	978.667	680.167	914.278	234.111	557.667	1141.67	514.333	621.667	1259.67	157.333	367	#N/A	#N/A	#N/A	#N/A	#N/A	#N/A	#N/A	#N/A	#N/A	#N/A	#N/A	#N/A
Fmo2	F69L	WT	15		TRUE			TSKEMSCFSDFPMPE		KEMSCFSDFPM	11	H2-Kd	0.2704		TNTSKEMSCFSDFPM	0.3186	681	441	813.333	468.667	955	488	951.333	878	1644.33	887.333	2919.33	561	772.444	211.444	671.8	1456.07	270.333	437	831	418.667	1964.33	#N/A	#N/A	#N/A	#N/A	#N/A	#N/A	#N/A	#N/A	#N/A	#N/A	#N/A	#N/A
Ggt7	W222R	WT	15		TRUE			EEALQRSWDTKPGLL		ALREEALQRSW	11	H2-Kd	0.1427		LREEALQRSWDTKPG	0.4062	2252.67	1861	2116.67	1939	2001.67	966.5	5118	1797.33	2799	2135.33	6164.33	2056.83	2627.28	570.444	2034.2	3602.8	2865.33	-63.6667	682.333	196.333	4162.67	#N/A	#N/A	#N/A	#N/A	#N/A	#N/A	#N/A	#N/A	#N/A	#N/A	#N/A	#N/A
Glycam1	T45I	WT	15		TRUE			PAAQSTPTSYTSEES		IPAAQSTPTSY	11	H2-Ld	0.1776		TQPTDAIPAAQSTPT	0.2427	653.333	361.667	487.667	349.333	625	200.5	687	732.667	1305	466.667	1671.67	507.5	540.056	32.5556	495.4	972.6	33.6667	371	817.333	117.333	1046.67	#N/A	#N/A	#N/A	#N/A	#N/A	#N/A	#N/A	#N/A	#N/A	#N/A	#N/A	#N/A
Hpcal4	A61V	WT	15		TRUE			KFFPYGDASKFAQHA		FPYGDASKF	9	H2-Ld	0.3489		EFQQLYIKFFPYGDA	0.1963	3734.33	6130.67	5649.67	9495.33	4521.33	1341	24740.3	7531.67	6451	6380.33	7239.33	4932.5	11204.3	6271.83	5906.27	10468.5	21006	1401	801.333	-3115	2718	#N/A	#N/A	#N/A	#N/A	#N/A	#N/A	#N/A	#N/A	#N/A	#N/A	#N/A	#N/A
Isoc1	V205L	WT	15		TRUE			IPGVRSVVLFGVETH		IPGVRSVVLF	10	H2-Ld	0.445		VEAALAEIPGVRSVV	0.4312	1477.67	912.667	1014.33	348.667	962.667	270	2762.33	1269.33	2092.33	752	1460	1195.17	1433.89	238.722	943.2	1667.2	1284.67	356.667	1078	403.333	497.333	#N/A	#N/A	#N/A	#N/A	#N/A	#N/A	#N/A	#N/A	#N/A	#N/A	#N/A	#N/A
Kbtbd2	T91R	WT	15		TRUE	TRUE	CD4	MIIAYAYTGNLAVND		AYAYTGNL	8	H2-Kd	0.5846		DAAALQMIIAYAYTG	0.5146	473.333	318.333	483	477.667	551.667	245	531.333	798	1015	432.667	994.667	395.833	524.778	128.944	460.8	754.333	58	479.667	532	-45	443	#N/A	#N/A	#N/A	#N/A	#N/A	#N/A	#N/A	#N/A	#N/A	#N/A	#N/A	#N/A
Kif2b	G454R	WT	15		TRUE			DLAGNERGADTAKAT		AGNERGADTA	10	H2-Kd	0.0544		AGNERGADTAKATRK	0.2167	982.333	479.667	676	465	880.333	291.5	966.333	986	1753	582.333	2158.33	731	747.944	16.9444	696.667	1289.2	-16	506.333	1077	117.333	1278	#N/A	#N/A	#N/A	#N/A	#N/A	#N/A	#N/A	#N/A	#N/A	#N/A	#N/A	#N/A
Lhx4	A31S	WT	15		TRUE			MQQIPQCAGCNQHIL		IPQCAGCNQHI	11	H2-Ld	0.4019		AGCNQHILDKFILKV	0.2919	3086.33	3875.33	5663.33	2283.33	3023.33	1578	22633.3	4227	5225.33	3376	6085.33	3480.83	9479.44	5998.61	3586.33	8309.4	19547	351.667	-438	1092.67	3062	#N/A	#N/A	#N/A	#N/A	#N/A	#N/A	#N/A	#N/A	#N/A	#N/A	#N/A	#N/A
Lyst	S850F	WT	15		TRUE			DIQQELPSLSVGPSL		LPSLSVGPSL	10	H2-Ld	0.4235		LDIQQELPSLSVGPS	0.3153	916.667	465.667	645.667	527.667	900.333	310	935.667	945	1877.33	645.667	2251	691.167	730.222	39.0556	691.2	1330.93	19	479.333	1231.67	118	1350.67	#N/A	#N/A	#N/A	#N/A	#N/A	#N/A	#N/A	#N/A	#N/A	#N/A	#N/A	#N/A
Malt1	T534A	WT	15			TRUE	CD4	LLEDKKITVLLDEVA		RLLEDKKITVL	11	H2-Kd	0.2168		RLLEDKKITVLLDEV	0.2466	713	369	637.333	253.333	636.333	209	675.667	847	1502	480.333	1581.33	541	577.222	36.2222	521.8	1017.27	-37.3333	478	864.667	227	945	#N/A	#N/A	#N/A	#N/A	#N/A	#N/A	#N/A	#N/A	#N/A	#N/A	#N/A	#N/A
Mc3r	A214G	WT	15		TRUE			YIHMFLFARLHVQRI		LYIHMFLFARL	11	H2-Kd	0.5298		FARLHVQRIAVLPPA	0.5987	3455.33	1458.33	1064.33	690.333	1043.67	1064.67	2605.33	1791.33	1972.33	696	1456	2456.83	1820.44	-636.389	1542.4	1704.2	-850	333	908	5.66667	412.333	#N/A	#N/A	#N/A	#N/A	#N/A	#N/A	#N/A	#N/A	#N/A	#N/A	#N/A	#N/A
Mrgprd	S28T	WT	15		TRUE			LVTWIYFSVTFLAMA		IYFSVTFL	8	H2-Kd	0.6457		SVTFLAMATCVGGMA	0.4248	560	332	334.667	257	385	157.5	565.667	700	1054	381.667	585	446	474.389	28.3889	373.733	657.267	5.66667	368	719.333	124.667	200	#N/A	#N/A	#N/A	#N/A	#N/A	#N/A	#N/A	#N/A	#N/A	#N/A	#N/A	#N/A
Nlrp14	S155R	WT	15		TRUE			EQVLSKPSSLLFIID		KPSSLLFII	9	H2-Ld	0.4128		SSEGPIEQVLSKPSS	0.2618	818.333	420	628.667	468	794.333	354	728	943.333	1720	574.333	1773.67	619.167	675.111	55.9444	625.867	1147.87	-90.3333	523.333	1091.33	106.333	979.333	#N/A	#N/A	#N/A	#N/A	#N/A	#N/A	#N/A	#N/A	#N/A	#N/A	#N/A	#N/A
Olfr1057	N307S	WT	15		TRUE			ALKEFLKNPCKRFNL		NPCKRFNL	8	H2-Ld	0.3401		RNKDVKCALKEFLKN	0.1857	2263.33	2602.67	2751.67	1267	2530.67	553.5	12851	2634	2297.67	957.333	2754.67	2433	5346.17	2913.17	2283.07	4298.93	10587.7	31.3333	-454	-309.667	224	#N/A	#N/A	#N/A	#N/A	#N/A	#N/A	#N/A	#N/A	#N/A	#N/A	#N/A	#N/A
Olfr1216	K20R	WT	15		TRUE			LGLSQNPKIEKILFV		SQNPKIEKI	9	H2-Kd	0.2931		SVTEFIILGLSQNPK	0.1509	1029.33	699.667	724	289.333	693.333	193.5	1998	1009	1753.33	507.667	1366	864.5	1066.83	202.333	687.133	1326.8	968.667	309.333	1029.33	218.333	672.667	#N/A	#N/A	#N/A	#N/A	#N/A	#N/A	#N/A	#N/A	#N/A	#N/A	#N/A	#N/A
Olfr1278	M208V	WT	15		TRUE			ANSGFISMGTFLLLI		GFISMGTFL	9	H2-Kd	0.4649		TANSGFISMGTFLLL	0.3502	646.667	347	407.333	263	588	158	633.333	723.333	1163.67	380.333	1342.67	496.833	504.889	8.05556	450.4	848.667	-13.3333	376.333	756.333	117.333	754.667	#N/A	#N/A	#N/A	#N/A	#N/A	#N/A	#N/A	#N/A	#N/A	#N/A	#N/A	#N/A
Olfr50	M146V	WT	15		TRUE			SLCVLLVMVSWAFSS		LVMVSWAF	8	H2-Ld	0.2677		YTTIMSQSLCVLLVM	0.3243	529	324	450.333	273.667	569	228	584.333	680	1239	467.333	1071.33	426.5	497.444	70.9444	429.2	808.4	55.3333	356	788.667	193.667	502.333	#N/A	#N/A	#N/A	#N/A	#N/A	#N/A	#N/A	#N/A	#N/A	#N/A	#N/A	#N/A
Olfr635	Q65H	WT	15		TRUE			RTEPSLHQPMYLFLS		QPMYLFLSM	9	H2-Ld	0.6139		SLHQPMYLFLSMLAL	0.3595	3103.33	2052	2450.33	1237	2122.33	1224	4693	1926.33	3697.33	5400.67	2544.33	2577.67	2614.44	36.7778	2193	3652.33	1589.67	-125.667	1247	4163.67	422	#N/A	#N/A	#N/A	#N/A	#N/A	#N/A	#N/A	#N/A	#N/A	#N/A	#N/A	#N/A
Olfr77	A300S	WT	15		TRUE			RNKDVKGALVRLLRR		KGALVRLL	8	H2-Kd	0.249		NKDVKGALVRLLRRV	0.3161	2915.67	3006	3258.67	1533.67	1782	590	14152.7	2759	2559	951	2334	2960.83	5833.89	2873.06	2499.2	4551.13	11237	-247	-699.667	-582.667	552	#N/A	#N/A	#N/A	#N/A	#N/A	#N/A	#N/A	#N/A	#N/A	#N/A	#N/A	#N/A
Olfr862	F161V	WT	15		TRUE			MNSLVHYFIVSQLKF		SYMNSLVHYFI	11	H2-Kd	0.8248		SYMNSLVHYFIVSQL	0.2572	771.333	470.333	554	295.333	551	199	1270.67	882.667	1239.67	428.333	870	620.833	784.111	163.278	528.4	938.267	499.333	412.333	685.667	133	319	#N/A	#N/A	#N/A	#N/A	#N/A	#N/A	#N/A	#N/A	#N/A	#N/A	#N/A	#N/A
Olfr881	C101Y	WT	15		TRUE			NIISHAECMTQLFFF		SHAECMTQL	9	H2-Kd	0.4252		VKQNIISHAECMTQL	0.2718	583.333	365.667	428.667	249.667	484.333	175	899.667	764	1069.33	348.667	832.333	474.5	612.889	138.389	422.333	782.8	316.333	398.333	640.667	99	348	#N/A	#N/A	#N/A	#N/A	#N/A	#N/A	#N/A	#N/A	#N/A	#N/A	#N/A	#N/A
Olfr938	N42K	WT	15		TRUE			YLVTVVGNLGMIVLI		VYLVTVVGNL	10	H2-Kd	0.4881		VGNLGMIVLILISSQ	0.3072	543.333	358.667	456.333	275.667	603.667	254	484.333	815.333	1033	382.667	1005.67	451	517.889	66.8889	447.533	744.2	-59	456.667	576.667	107	402	#N/A	#N/A	#N/A	#N/A	#N/A	#N/A	#N/A	#N/A	#N/A	#N/A	#N/A	#N/A
Olfr979	T75K	WT	15		TRUE			DMWFSTVTVPKMLMT		MWFSTVTV	8	H2-Kd	0.3178		VTVPKMLMTLVSPRG	0.4146	3930.33	4167.33	2955.67	4622	3415.67	1821.5	10960.7	2993.33	5142.67	4675	7982.33	4048.83	5258.5	1209.67	3818.2	6350.8	7030.33	-1174	2187	53	4566.67	#N/A	#N/A	#N/A	#N/A	#N/A	#N/A	#N/A	#N/A	#N/A	#N/A	#N/A	#N/A
Pzp	G1199E	WT	15			TRUE	CD8	SLHWQRPGDVQKVKA		RPGDVQKVKAL	11	H2-Ld	0.2266		HWQRPGDVQKVKALS	0.4365	3484.67	5433.67	6640.33	3498.33	3179.33	1739.5	16993.7	5290.33	6444	5169.33	6167.33	4459.17	8007.83	3548.67	4447.27	8012.93	13509	-143.333	-196.333	1671	2988	#N/A	#N/A	#N/A	#N/A	#N/A	#N/A	#N/A	#N/A	#N/A	#N/A	#N/A	#N/A
Rragd	L268P	WT	15			TRUE	CD4	HQTSAPSLKALAHNG		SHQTSAPSL	9	H2-Kd	0.3703		SCSHQTSAPSLKALA	0.3698	3837	4458.33	4919	3373.33	3161.33	2437	21664	5987.33	5843	3798	6341.67	4147.67	10029.4	5881.78	3949.8	8726.8	17827	1529	924	424.667	3180.33	#N/A	#N/A	#N/A	#N/A	#N/A	#N/A	#N/A	#N/A	#N/A	#N/A	#N/A	#N/A
Slc19a3	F185L	WT	15		TRUE			LACVSVAFFFSLFLP		FFFSLFLPM	9	H2-Ld	0.3884		SSLFYISLACVSVAF	0.4378	534.333	287.667	351.333	216.667	443.667	150	854	666.667	1167.33	364	774.667	411	556.889	145.889	366.733	765.333	319.667	379	816	147.333	331	#N/A	#N/A	#N/A	#N/A	#N/A	#N/A	#N/A	#N/A	#N/A	#N/A	#N/A	#N/A
Slc6a2	V307E	WT	15		TRUE			YRLKEATVWIDAATQ		VWIDAATQI	9	H2-Kd	0.4861		FYRLKEATVWIDAAT	0.3219	464.333	338	561	320	682	724	693	813	936	456	1130.67	401.167	743.333	342.167	473.067	805.733	228.667	475	375	136	448.667	#N/A	#N/A	#N/A	#N/A	#N/A	#N/A	#N/A	#N/A	#N/A	#N/A	#N/A	#N/A
Sostdc1	N112K	WT	15		TRUE			LPLPVLPNWIGGGYG		LPLPVLPNWI	10	H2-Ld	0.3539		VCAGECLPLPVLPNW	0.3264	8764.67	18516	32115.7	10470.7	9720.67	3886	31388.7	18362.7	20704.7	10845.3	14093.3	13640.3	17879.1	4238.78	15917.5	19078.9	22624	-153.333	-11411	374.667	4372.67	#N/A	#N/A	#N/A	#N/A	#N/A	#N/A	#N/A	#N/A	#N/A	#N/A	#N/A	#N/A
Spam1	I144S	WT	15		TRUE			DKLGLAIIDWEEWRP		LGLAIIDWEEW	11	H2-Dd	0.1438		YIPDDKLGLAIIDWE	0.1714	1024	489.667	669.667	512	896.667	227.5	1028.33	862	1835.33	583.667	2454.67	756.833	705.944	-50.8889	718.4	1352.8	4.33333	372.333	1165.67	71.6667	1558	#N/A	#N/A	#N/A	#N/A	#N/A	#N/A	#N/A	#N/A	#N/A	#N/A	#N/A	#N/A
Sult2a1	Q262H	WT	15		TRUE			KNHFTVAQAEAFDKV		NHFTVAQAEAF	11	H2-Kd	0.2005		KNHFTVAQAEAFDKV	0.2973	1118.67	566.667	803.333	403.333	796.333	201	1716.67	1166.33	1630.33	497.667	1446.67	842.667	1028	185.333	737.667	1291.53	598	599.667	827	94.3333	650.333	#N/A	#N/A	#N/A	#N/A	#N/A	#N/A	#N/A	#N/A	#N/A	#N/A	#N/A	#N/A
Sva	T41P	WT	15		TRUE			HNEPRNYTLTLNMKI		NYTLTLNMKI	10	H2-Kd	0.5423		RNYTLTLNMKITPST	0.25	1552	1430	1500.67	668.333	1893.67	294	2667.33	1726.67	2380.33	1071	1657.67	1491	1562.67	71.6667	1408.93	1900.6	1115.33	296.667	879.667	402.667	-236	#N/A	#N/A	#N/A	#N/A	#N/A	#N/A	#N/A	#N/A	#N/A	#N/A	#N/A	#N/A
Taf4b	P561H	WT	15		TRUE			TPVNAVMPTSKFPPS		MPTSKFPPSSI	11	H2-Ld	0.3327		GQKTPVNAVMPTSKF	0.3228	1428	738	805.333	628	1218.67	490	1302.33	1031.67	1875.33	934	1761.33	1083	941.333	-141.667	963.6	1380.93	-125.667	293.667	1070	306	542.667	#N/A	#N/A	#N/A	#N/A	#N/A	#N/A	#N/A	#N/A	#N/A	#N/A	#N/A	#N/A
Tcf3	S255N	WT	15		TRUE			PLPLAPGSSSVGSGT		LPLAPGSSSV	10	H2-Ld	0.3066		GDGSSPLPLAPGSSS	0.1776	1693	1452.33	1298	840.667	1225	515	4081.67	1829.67	2514.33	990	3155	1572.67	2142.11	569.444	1301.8	2514.13	2388.67	377.333	1216.33	149.333	1930	#N/A	#N/A	#N/A	#N/A	#N/A	#N/A	#N/A	#N/A	#N/A	#N/A	#N/A	#N/A
Tmtc2	V201I	WT	15		TRUE	TRUE	CD8	AVSAVYDVFVFHRLK		VSAVYDVF	8	H2-Dd	0.2896		VFVFHRLKMKQILPT	0.3997	3133	1205.67	839.667	550.333	779	288	969.333	1085.33	1277.33	579.333	1067	2169.33	780.889	-1388.44	1301.53	995.667	-2163.67	-120.333	437.667	29	288	#N/A	#N/A	#N/A	#N/A	#N/A	#N/A	#N/A	#N/A	#N/A	#N/A	#N/A	#N/A
Usp43	R621W	WT	15		TRUE			NMAPHVARRSTNSKA		APHVARRST	9	H2-Ld	0.1209		PLSGLNMAPHVARRS	0.4006	1786.67	1358.33	1148.67	914	1770	494	5704.67	2116	2680.67	1082.67	1889.67	1572.5	2771.56	1199.06	1395.53	2694.73	3918	757.667	1532	168.667	119.667	#N/A	#N/A	#N/A	#N/A	#N/A	#N/A	#N/A	#N/A	#N/A	#N/A	#N/A	#N/A
Vmn1r9	V126D	WT	15		TRUE			LKKYMVCVFLCIWSF		KYMVCVFL	8	H2-Kd	0.6818		LKKYMVCVFLCIWSF	0.4222	736	643	718	234	639	166.5	1219.33	960	1594.67	389.333	933.333	689.5	781.944	92.4444	594	1019.33	483.333	317	876.667	155.333	294.333	#N/A	#N/A	#N/A	#N/A	#N/A	#N/A	#N/A	#N/A	#N/A	#N/A	#N/A	#N/A
Zmynd12	R13C	WT	15		TRUE			PLAVPKGRRLSCEVC		YPLAVPKGRRL	11	H2-Ld	0.5388		NVIYPLAVPKGRRLS	0.306	2790.33	4260.67	3609.67	3037.67	3538	1408	13894.7	2915.67	5777	2135.33	4327.67	3525.5	6072.78	2547.28	3447.27	5810.07	11104.3	-1345	2167.33	-902.333	789.667	#N/A	#N/A	#N/A	#N/A	#N/A	#N/A	#N/A	#N/A	#N/A	#N/A	#N/A	#N/A
Zzz3	K311N	WT	15			TRUE	CD8	FKKLKKQKLQQMQAE		KLQQMQAESGF	11	H2-Kd	0.2697		KLQQMQAESGFVQHV	0.3505	1907.67	1826.67	2440.67	2045.33	2497	1293	12684.3	5657.67	4397.33	1805	3208	1867.17	6545	4677.83	2143.47	5550.47	10776.7	3831	1956.67	-240.333	711	#N/A	#N/A	#N/A	#N/A	#N/A	#N/A	#N/A	#N/A	#N/A	#N/A	#N/A	#N/A
[truncated: 19 more columns]

## Sheet: 4 TMT Mass Spectrometry
TMT Mass Spectrometry
FOX1488 project analyzed by Phil Wilmarth, PSR Core, OHSU, May 25, 2017
Rank	Accession	Description	# Unique Peptides	# Peptides	# All PSMs	# Used PSMs	TotInt 127_C	TotInt 128_N	TotInt 128_C	TotInt 130_N	TotInt 129_C	TotInt 131	Filter	Ranker	Norm Lot B 4T1 Whole Cells	Norm Lot B 4T1 Vaccine	Norm Lot C 4T1 Whole Cells	Norm Lot C 4T1 Vaccine	Norm Lot D 4T1 Whole Cells	Norm Lot D 4T1 Vaccine	Ave 4T1 Whole Cell	Ave 4T1 Vaccine	FC	logFC	PValue	FDR	PassTest	Candidate	Index	Primary Protein Name	Alternative Protein Names	Identifier	Accession	Other Accessions	UniProt Gene Name	Other Gene Synonyms	Species Name	Taxonomy Number	UniProt Link	MGI Accession	MGI Gene Name	MGI Link	Tested on IgG Array	Confirmed Mutation	Key Words
28	Q6PB66	Leucine-rich PPR motif-containing protein, mitochondrial OS=Mus musculus GN=Lrpprc PE=1 SV=2 - [LPPRC_MOUSE]	56	79	177	103	1188928	3740294	1129797	3075821	1062685	5469476		2.61117e+06	1.19651e+06	3.50727e+06	1.22836e+06	3.13522e+06	1.1294e+06	4.98061e+06	1.18476e+06	3.87437e+06	3.27018	1.56928	3.06225e-07	2.06911e-06	FALSE	high	Q6PB66	Leucine-rich PPR motif-containing protein, mitochondrial	130 kDa leucine-rich protein (LRP 130; mLRP130)	LPPRC_MOUSE	Q6PB66	Q8K4V0; Q9CRX4	Lrpprc	Lrp130	Mus musculus (Mouse)	10090	Q6PB66	MGI:1919666	Lrpprc	MGI:1919666	TRUE	TRUE	Acetylation; DNA-binding; Membrane; Mitochondrion; mRNA transport; Nucleus; Repeat; RNA-binding; Transcription; Transcription regulation; Transit peptide; Transport
36	Q80X90	Filamin-B OS=Mus musculus GN=Flnb PE=1 SV=3 - [FLNB_MOUSE]	71	105	218	112	2917192	1341427	2633944	2628002	2820860	873074		2.20242e+06	2.93579e+06	1.25785e+06	2.86374e+06	2.67876e+06	2.99795e+06	795038	2.93249e+06	1.57722e+06	-1.85928	-1.19703	0.000168833	0.000504574	FALSE	high	Q80X90	Filamin-B (FLN-B)	ABP-280-like protein; Actin-binding-like protein; Beta-filamin	FLNB_MOUSE	Q80X90	E9QNV9; Q8VHX4; Q8VHX7; Q99KY3	Flnb	na	Mus musculus (Mouse)	10090	Q80X90	MGI:2446089	Flnb	MGI:2446089	TRUE	TRUE	Acetylation; Actin-binding; Cytoplasm; Cytoskeleton; Isopeptide bond; Phosphoprotein; Repeat; Ubl conjugation
156	Q9Z1Q9	Valine--tRNA ligase OS=Mus musculus GN=Vars PE=2 SV=1 - [SYVC_MOUSE]	40	54	117	59	1598119	889217	1352119	846733	1356040	598465		1.10678e+06	1.60831e+06	833817	1.47008e+06	863086	1.44117e+06	544973	1.50652e+06	747292	-2.01597	-1.15039	0.000115469	0.000363199	FALSE	high	Q9Z1Q9	Valine--tRNA ligase	Protein G7a; Valyl-tRNA synthetase (ValRS)	SYVC_MOUSE	Q9Z1Q9	Q9QUN2	Vars	Bat6; G7a; Vars2	Mus musculus (Mouse)	10090	Q9Z1Q9	MGI:90675	Vars	MGI:90675	TRUE	TRUE	Acetylation; Aminoacyl-tRNA synthetase; ATP-binding; Ligase; Nucleotide-binding; Protein biosynthesis
1052	P08775	DNA-directed RNA polymerase II subunit RPB1 OS=Mus musculus GN=Polr2a PE=1 SV=3 - [RPB1_MOUSE]	22	49	73	18	208979	120251	191437	246236	169040	140604		179424	210312	112759	208139	250992	179652	128037	199367	163929	-1.21618	-0.484042	0.107775	0.159122	FALSE	no	P08775	DNA-directed RNA polymerase II subunit RPB1 (RNA polymerase II subunit B1)	DNA-directed RNA polymerase II subunit A; DNA-directed RNA polymerase III largest subunit	RPB1_MOUSE	P08775	Q5F298	Polr2a	Rpii215; Rpo2-1	Mus musculus (Mouse)	10090	P08775	MGI:98086	Polr2a	MGI:98086	TRUE	TRUE	Acetylation; DNA-binding; DNA-directed RNA polymerase; Magnesium; Metal-binding; Methylation; Nucleotidyltransferase; Nucleus; Phosphoprotein; Repeat; Transcription; Transferase; Ubl conjugation; Zinc
1369	Q8BU88	39S ribosomal protein L22, mitochondrial OS=Mus musculus GN=Mrpl22 PE=2 SV=1 - [RM22_MOUSE]	5	14	22	7	47016	155322	60196	144604	60714	240172		118004	47315.8	145645	65447.7	147397	64525.5	218705	59096.3	170582	2.88651	1.40744	2.82683e-06	1.37763e-05	FALSE	high	Q8BU88	39S ribosomal protein L22, mitochondrial (L22mt; MRP-L22)	na	RM22_MOUSE	Q8BU88	Q8BK04	Mrpl22	na	Mus musculus (Mouse)	10090	Q8BU88	MGI:1333794	Mrpl22	MGI:1333794	TRUE	TRUE	Mitochondrion; Ribonucleoprotein; Ribosomal protein; Transit peptide
1848	Q8BVG4	Dipeptidyl peptidase 9 OS=Mus musculus GN=Dpp9 PE=2 SV=2 - [DPP9_MOUSE]	6	22	29	5	50027	92324	48311	71302	43260	111571		69465.8	50346	86572	52525.8	72679.1	45975.8	101599	49615.9	86949.9	1.75246	0.68691	0.0203776	0.0366815	FALSE	med	Q8BVG4	Dipeptidyl peptidase 9 (DP9)	Dipeptidyl peptidase IX (DPP IX); Dipeptidyl peptidase-like protein 9 (DPLP9)	DPP9_MOUSE	Q8BVG4	Q6KAM9; Q8BWT9	Dpp9	na	Mus musculus (Mouse)	10090	Q8BVG4	MGI:2443967	Dpp9	MGI:2443967	TRUE	TRUE	Alternative splicing; Aminopeptidase; Cytoplasm; Hydrolase; Protease; Serine protease
1880	O88532	Zinc finger RNA-binding protein OS=Mus musculus GN=Zfr PE=1 SV=2 - [ZFR_MOUSE]	10	22	25	7	62153	88255	61246	49801	60752	81961		67361.3	62549.3	82756.6	66589.3	50762.8	64565.9	74635.2	64568.2	69384.9	1.0746	-0.0360639	0.902539	0.929794	FALSE	no	O88532	Zinc finger RNA-binding protein	na	ZFR_MOUSE	O88532	Q3TY30; Q8BS85; Q8CGG5; Q91VZ0; Q9CT34	Zfr	na	Mus musculus (Mouse)	10090	O88532	MGI:1341890	Zfr	MGI:1341890	TRUE	TRUE	Acetylation; Chromosome; Cytoplasm; Developmental protein; DNA-binding; Nucleus; Phosphoprotein; Repeat; RNA-binding
2083	Q9CZC8	Secernin-1 OS=Mus musculus GN=Scrn1 PE=1 SV=1 - [SCRN1_MOUSE]	4	11	14	4	56913	68828	50619	46985	45372	51961		53446.3	57275.9	64539.9	55035.2	47892.4	48220.4	47316.7	53510.5	53249.7	-1.0049	-0.12911	0.65632	0.724715	FALSE	no	Q9CZC8	Secernin-1	na	SCRN1_MOUSE	Q9CZC8	Q3UKR2; Q8CCL3	Scrn1	Kiaa0193	Mus musculus (Mouse)	10090	Q9CZC8	MGI:1917188	Scrn1	MGI:1917188	TRUE	TRUE	Cytoplasm; Exocytosis
2653	Q6URW6	Myosin-14 OS=Mus musculus GN=Myh14 PE=1 SV=1 - [MYH14_MOUSE]	6	62	78	4	26282	47236	24898	31317	25427	21735		29482.5	26449.6	44293.1	27070.2	31921.8	27023.3	19792.3	26847.7	32002.4	1.192	0.0680315	0.820405	0.864929	FALSE	no	Q6URW6	Myosin-14	Myosin heavy chain 14; Myosin heavy chain, non-muscle IIc; Non-muscle myosin heavy chain IIc (NMHC II-C)	MYH14_MOUSE	Q6URW6	B3F3T1; Q80V64; Q80ZE6	Myh14	na	Mus musculus (Mouse)	10090	Q6URW6	MGI:1919210	Myh14	MGI:1919210	TRUE	TRUE	Acetylation; Actin-binding; Alternative splicing; ATP-binding; Calmodulin-binding; Cell shape; Coiled coil; Motor protein; Myosin; Nucleotide-binding; Phosphoprotein
2704	Q3TNL8	Inositol 1,4,5-trisphosphate receptor-interacting protein OS=Mus musculus GN=Itprip PE=2 SV=1 - [IPRI_MOUSE]	6	16	19	3	21093	33092	16639	30946	22923	43600		28048.8	21227.5	31030.3	18090.6	31543.7	24362.1	39703	21226.7	34092.3	1.6061	0.574334	0.0529948	0.0854269	FALSE	low	Q3TNL8	Inositol 1,4,5-trisphosphate receptor-interacting protein	na	IPRI_MOUSE	Q3TNL8	Q3TAD9; Q3TB01; Q571G7; Q6P400	Itprip	Kiaa1754	Mus musculus (Mouse)	10090	Q3TNL8	MGI:3042776	Itprip	MGI:3042776	TRUE	TRUE	Alternative splicing; Cell membrane; Coiled coil; Glycoprotein; Membrane; Signal
2802	P28563	Dual specificity protein phosphatase 1 OS=Mus musculus GN=Dusp1 PE=1 SV=1 - [DUS1_MOUSE]	3	10	12	3	26480	15858	23270	23139	24820	37356		25153.8	26648.9	14870	25300.2	23585.9	26378.1	34017.1	26109.1	24157.7	-1.08078	-0.299746	0.33089	0.413342	FALSE	no	P28563	Dual specificity protein phosphatase 1	Mitogen-activated protein kinase phosphatase 1 (MAP kinase phosphatase 1; MKP-1); Protein-tyrosine phosphatase 3CH134; Protein-tyrosine phosphatase ERP	DUS1_MOUSE	P28563	na	Dusp1	3ch134; Mkp1; Ptpn10; Ptpn16	Mus musculus (Mouse)	10090	P28563	MGI:105120	Dusp1	MGI:105120	TRUE	TRUE	Cell cycle; Hydrolase; Nucleus; Phosphoprotein; Protein phosphatase
3287	Q8R0F6	Integrin-linked kinase-associated serine/threonine phosphatase 2C OS=Mus musculus GN=Ilkap PE=2 SV=1 - [ILKAP_MOUSE]	3	12	17	4	20493	13113	17289	10609	16389	5063		13826	20623.7	12296	18797.4	10813.9	17417.9	4610.46	18946.3	9240.13	-2.05044	-1.26094	0.000156629	0.000473839	FALSE	high	Q8R0F6	Integrin-linked kinase-associated serine/threonine phosphatase 2C (ILKAP)	na	ILKAP_MOUSE	Q8R0F6	Q05CC3	Ilkap	na	Mus musculus (Mouse)	10090	Q8R0F6	MGI:1914694	Ilkap	MGI:1914694	TRUE	TRUE	Acetylation; Alternative splicing; Cytoplasm; Hydrolase; Magnesium; Manganese; Metal-binding; Protein phosphatase
3749	Q0VGT2	Zinc finger protein GLI2 OS=Mus musculus GN=Gli2 PE=1 SV=2 - [GLI2_MOUSE]	2	16	25	1	2402	4086	2116	4828	19550	8828		6968.33	2417.32	3831.43	2300.61	4921.24	20777.3	8038.94	8498.41	5597.21	-1.51833	0.0427449	0.919343	0.94087	FALSE	no	Q0VGT2	Zinc finger protein GLI2	Tax helper protein	GLI2_MOUSE	Q0VGT2	E9PYJ4	Gli2	na	Mus musculus (Mouse)	10090	Q0VGT2	MGI:95728	Gli2	MGI:95728	TRUE	TRUE	Acetylation; Activator; Cytoplasm; DNA-binding; Metal-binding; Nucleus; Phosphoprotein; Repeat; Repressor; Transcription; Transcription regulation; Zinc; Zinc-finger
4071	Q8K4P0	pre-mRNA 3' end processing protein WDR33 OS=Mus musculus GN=Wdr33 PE=1 SV=1 - [WDR33_MOUSE]	4	26	33	1	5784	2843	2319	5247	574	1111		2979.67	5820.88	2665.88	2521.32	5348.34	610.034	1011.7	2984.08	3008.64	1.00823	0.147723	0.754544	0.809115	FALSE	no	Q8K4P0	pre-mRNA 3' end processing protein WDR33	WD repeat-containing protein 33; WD repeat-containing protein WDC146	WDR33_MOUSE	Q8K4P0	Q8C7C6; Q8CD02	Wdr33	Wdc146	Mus musculus (Mouse)	10090	Q8K4P0	MGI:1921570	Wdr33	MGI:1921570	TRUE	TRUE	Acetylation; Collagen; mRNA processing; Nucleus; Phosphoprotein; Repeat; WD repeat
4354	O54782	Epididymis-specific alpha-mannosidase OS=Mus musculus GN=Man2b2 PE=2 SV=2 - [MA2B2_MOUSE]	2	11	11	0	0	0	0	0	0	0		0																					Man2b2						Man2b2		TRUE	TRUE
2030	Q8BHL4	Retinoic acid-induced protein 3 OS=Mus musculus GN=Gprc5a PE=1 SV=1 - [RAI3_MOUSE]	2	2	4	3	32941	62463	33365	125910	47068	39510		56876.2	33151.1	58571.4	36275.9	128342	50022.8	35978.5	39816.6	74297.2	1.86599	0.611051	0.0931889	0.140402	FALSE	no	Q8BHL4	Retinoic acid-induced protein 3	G-protein coupled receptor family C group 5 member A; Retinoic acid-induced gene 1 protein (RAIG-1)	RAI3_MOUSE	Q8BHL4	Q8K067; Q8K1G5	Gprc5a	Rai3; Raig1	Mus musculus (Mouse)	10090	Q8BHL4	MGI:1891250	Gprc5a	MGI:1891250	TRUE		Cell membrane; G-protein coupled receptor; Glycoprotein; Membrane; Phosphoprotein; Receptor; Transducer; Transmembrane; Transmembrane helix
3415	Q8K1X1	WD repeat-containing protein 11 OS=Mus musculus GN=Wdr11 PE=2 SV=1 - [WDR11_MOUSE]	4	25	30	3	11751	16926	10403	8823	9162	11991		11509.3	11825.9	15871.5	11310.6	8993.4	9737.17	10919.2	10957.9	11928	1.08853	-0.0238278	0.944205	0.959818	FALSE	no	Q8K1X1	WD repeat-containing protein 11	Bromodomain and WD repeat-containing protein 2	WDR11_MOUSE	Q8K1X1	Q69ZL3; Q8C937	Wdr11	Brwd2; Kiaa1351	Mus musculus (Mouse)	10090	Q8K1X1	MGI:1920230	Wdr11	MGI:1920230	TRUE		Cytoplasm; Membrane; Nucleus; Repeat; Transmembrane; Transmembrane helix; WD repeat
3770	Q8BMI4	Flap endonuclease GEN homolog 1 OS=Mus musculus GN=Gen1 PE=2 SV=2 - [GEN_MOUSE]	2	17	23	1	3162	6642	3979	14600	3854	8040		6712.83	3182.16	6228.19	4326.14	14882	4095.95	7321.37	3868.08	9477.18	2.4501	1.08329	0.00607298	0.0124303	FALSE	med	Q8BMI4	Flap endonuclease GEN homolog 1	na	GEN_MOUSE	Q8BMI4	B2RR04; Q3TYY2; Q5CZW6; Q8C0J0	Gen1	na	Mus musculus (Mouse)	10090	Q8BMI4	MGI:2443149	Gen1	MGI:2443149	TRUE		Alternative splicing; DNA damage; DNA repair; Endonuclease; Hydrolase; Magnesium; Metal-binding; Nuclease; Nucleus
2677	F8VQB6	Unconventional myosin-X OS=Mus musculus GN=Myo10 PE=1 SV=1 - [MYO10_MOUSE]	13	43	60	8	14174	35140	11854	55526	15026	40980		28783.3	14264.4	32950.7	12888.2	56598.4	15969.3	37317.2	14374	42288.7	2.94204	1.40912	4.39862e-06	2.01136e-05	FALSE	high	F8VQB6	Unconventional myosin-X	Unconventional myosin-10	MYO10_MOUSE	F8VQB6	Q8R3S0; Q9JJY5	Myo10	na	Mus musculus (Mouse)	10090	F8VQB6	MGI:107716	Myo10	MGI:107716		TRUE	Acetylation; Actin-binding; Alternative promoter usage; ATP-binding; Calmodulin-binding; Cell membrane; Cell projection; Coiled coil; Cytoplasm; Cytoskeleton; Membrane; Motor protein; Myosin; Nucleotide-binding; Phosphoprotein; Repeat; Transport
3626	Q9ET54	Palladin OS=Mus musculus GN=Palld PE=1 SV=2 - [PALLD_MOUSE]	3	26	29	2	7766	9682	8559	8850	8735	7393		8497.5	7815.52	9078.79	9305.72	9020.92	9283.36	6732.2	8801.53	8277.31	-1.06333	-0.207791	0.565323	0.643541	FALSE	no	Q9ET54	Palladin	na	PALLD_MOUSE	Q9ET54	A0JNZ3; Q69ZT7; Q6DFX7; Q9CWW1	Palld	Kiaa0992	Mus musculus (Mouse)	10090	Q9ET54	MGI:1919583	Palld	MGI:1919583		TRUE	3D-structure; Actin-binding; Alternative splicing; Cell junction; Cell projection; Cytoplasm; Cytoskeleton; Disulfide bond; Immunoglobulin domain; Phosphoprotein; Repeat
3662	Q3U6N9	UPF0488 protein C8orf33 homolog OS=Mus musculus PE=2 SV=1 - [CH033_MOUSE]	2	9	10	1	1102	15890	433	13160	683	16420		7948	1109.03	14900	470.776	13414.2	725.877	14952.4	768.56	14422.2	18.7652	4.20447	3.38582e-22	9.47127e-20	FALSE	high	Q3U6N9	UPF0488 protein C8orf33 homolog	na	CH033_MOUSE	Q3U6N9	Q3URI5; Q9D0Z5	na	na	Mus musculus (Mouse)	10090	Q3U6N9	MGI:2152337	1110038F14Rik	MGI:2152337		TRUE	Acetylation; Alternative splicing; Phosphoprotein
4274	Q923Q2	StAR-related lipid transfer protein 13 OS=Mus musculus GN=Stard13 PE=1 SV=5 - [STA13_MOUSE]	2	16	21	0	0	0	0	0	0	0		0																					Stard13						Stard13			TRUE
1	P62806	Histone H4 OS=Mus musculus GN=Hist1h4a PE=1 SV=2 - [H4_MOUSE]	8	9	102	76	7110199	7867675	6427417	4506938	7395606	11629923		7.48963e+06	7.15554e+06	7.3775e+06	6.98817e+06	4.59398e+06	7.85989e+06	1.05904e+07	7.33453e+06	7.52064e+06	1.02537	-0.154576	0.610493	0.684927	FALSE	no	P62806	Histone H4	na	H4_MOUSE	P62806	A0AUM5; A4FUP8; A4QMY0; P02304; P02305; Q0VDL9; Q2M2Q5; Q5T006; Q6PDS7; Q811M0; Q9D0C9; Q9D6Q8	Hist1h4a	na	Mus musculus (Mouse)	10090	P62806	MGI:2448419	Hist1h4a	MGI:2448419			3D-structure; Acetylation; Chromosome; Citrullination; DNA-binding; Isopeptide bond; Methylation; Nucleosome core; Nucleus; Phosphoprotein; Ubl conjugation
2	P63038	60 kDa heat shock protein, mitochondrial OS=Mus musculus GN=Hspd1 PE=1 SV=1 - [CH60_MOUSE]	37	46	431	246	3080166	10098006	2902957	9517897	3040516	15599052		7373099	3.09981e+06	9.46888e+06	3.15622e+06	9.70172e+06	3.23139e+06	1.42048e+07	3.16247e+06	1.11251e+07	3.51786	1.67787	5.2675e-08	4.65972e-07	FALSE	high	P63038	60 kDa heat shock protein, mitochondrial	60 kDa chaperonin; Chaperonin 60 (CPN60); HSP-65; Heat shock protein 60 (HSP-60; Hsp60); Mitochondrial matrix protein P1	CH60_MOUSE	P63038	P19226; P19227; P97602; Q3KQP2; Q3UIP0; Q8C2C7; Q8VEF4	Hspd1	Hsp60	Mus musculus (Mouse)	10090	P63038	MGI:96242	Hspd1	MGI:96242			Acetylation; Alternative splicing; ATP-binding; Chaperone; Mitochondrion; Nucleotide-binding; Phosphoprotein; Transit peptide
3	P63017	Heat shock cognate 71 kDa protein OS=Mus musculus GN=Hspa8 PE=1 SV=1 - [HSP7C_MOUSE]	29	41	413	188	5425117	5539812	6132795	12102060	5084341	7800076		7.01403e+06	5.45971e+06	5.19467e+06	6.66784e+06	1.23358e+07	5.40353e+06	7.1029e+06	5.84369e+06	8.21112e+06	1.40512	0.293582	0.335045	0.41791	FALSE	no	P63017	Heat shock cognate 71 kDa protein	Heat shock 70 kDa protein 8	HSP7C_MOUSE	P63017	P08109; P12225; Q3U6R0; Q3U764; Q3U7D7; Q3U7E2; Q3U9B4; Q3U9G0; Q3UGM0; Q5FWJ6; Q62373; Q62374; Q62375; Q6NZD0	Hspa8	Hsc70; Hsc73	Mus musculus (Mouse)	10090	P63017	MGI:105384	Hspa8	MGI:105384			3D-structure; Acetylation; ATP-binding; Cell membrane; Chaperone; Cytoplasm; Membrane; Methylation; mRNA processing; mRNA splicing; Nucleotide-binding; Nucleus; Phosphoprotein; Repressor; Spliceosome; Stress response; Transcription; Transcription regulation; Ubl conjugation
4	P20029	78 kDa glucose-regulated protein OS=Mus musculus GN=Hspa5 PE=1 SV=3 - [GRP78_MOUSE]	38	52	304	159	4175992	9619793	2775829	8819315	3011610	13217385		6936654	4.20262e+06	9.02046e+06	3.018e+06	8.98964e+06	3.20067e+06	1.2036e+07	3.47376e+06	1.00154e+07	2.88314	1.4195	4.17699e-06	1.92178e-05	FALSE	high	P20029	78 kDa glucose-regulated protein (GRP-78)	Heat shock 70 kDa protein 5; Immunoglobulin heavy chain-binding protein (BiP)	GRP78_MOUSE	P20029	O35642; Q3UFF2; Q61630	Hspa5	Grp78	Mus musculus (Mouse)	10090	P20029	MGI:95835	Hspa5	MGI:95835			Acetylation; ATP-binding; Cytoplasm; Endoplasmic reticulum; Methylation; Nitration; Nucleotide-binding; Phosphoprotein; Signal
5	P58252	Elongation factor 2 OS=Mus musculus GN=Eef2 PE=1 SV=2 - [EF2_MOUSE]	44	61	279	165	9825411	3657855	9743536	4999439	9334165	2661662		6703678	9.88806e+06	3.42996e+06	1.05936e+07	5.09599e+06	9.92014e+06	2.42376e+06	1.01339e+07	3.64991e+06	-2.77649	-1.65038	1.02645e-07	8.21941e-07	FALSE	high	P58252	Elongation factor 2 (EF-2)	na	EF2_MOUSE	P58252	Q544E4	Eef2	na	Mus musculus (Mouse)	10090	P58252	MGI:95288	Eef2	MGI:95288			Acetylation; Cytoplasm; Elongation factor; GTP-binding; Isopeptide bond; Methylation; Nucleotide-binding; Nucleus; Phosphoprotein; Protein biosynthesis; Ubl conjugation
6	P10126	Elongation factor 1-alpha 1 OS=Mus musculus GN=Eef1a1 PE=1 SV=3 - [EF1A1_MOUSE]	21	27	251	167	8783862	3929501	7531318	4572679	6661207	2113200		5.59863e+06	8.83987e+06	3.68469e+06	8.18838e+06	4.66099e+06	7.07938e+06	1.92432e+06	8.03588e+06	3.42333e+06	-2.34738	-1.42953	3.62638e-06	1.70014e-05	FALSE	high	P10126	Elongation factor 1-alpha 1 (EF-1-alpha-1)	Elongation factor Tu (EF-Tu); Eukaryotic elongation factor 1 A-1 (eEF1A-1)	EF1A1_MOUSE	P10126	Q61511; Q6ZWN2; Q8BMB8; Q8BVS8; Q99KU5	Eef1a1	Eef1a	Mus musculus (Mouse)	10090	P10126	MGI:1096881	Eef1a1	MGI:1096881			Acetylation; Cytoplasm; Elongation factor; GTP-binding; Methylation; Nucleotide-binding; Nucleus; Phosphoprotein; Protein biosynthesis; Ubl conjugation
7	Q64433	10 kDa heat shock protein, mitochondrial OS=Mus musculus GN=Hspe1 PE=1 SV=2 - [CH10_MOUSE]	9	11	66	51	1652869	6219967	1358585	6759855	1534582	10815659		4.72359e+06	1.66341e+06	5.83245e+06	1.47711e+06	6.89041e+06	1.63092e+06	9.84894e+06	1.59048e+06	7.52393e+06	4.7306	2.09869	2.16403e-11	6.13533e-10	FALSE	high	Q64433	10 kDa heat shock protein, mitochondrial (Hsp10)	10 kDa chaperonin; Chaperonin 10 (CPN10)	CH10_MOUSE	Q64433	na	Hspe1	na	Mus musculus (Mouse)	10090	Q64433	MGI:104680	Hspe1	MGI:104680			Acetylation; Chaperone; Mitochondrion; Phosphoprotein; Stress response
8	P09405	Nucleolin OS=Mus musculus GN=Ncl PE=1 SV=2 - [NUCL_MOUSE]	27	38	143	89	7529389	2039607	7542017	1424873	7739661	1917766		4.69889e+06	7.5774e+06	1.91254e+06	8.20001e+06	1.45239e+06	8.22554e+06	1.74635e+06	8.00098e+06	1.70376e+06	-4.69607	-2.35025	5.55389e-14	3.32916e-12	FALSE	high	P09405	Nucleolin	Protein C23	NUCL_MOUSE	P09405	Q548M9; Q61991; Q8BQD8; Q99K50	Ncl	Nuc	Mus musculus (Mouse)	10090	P09405	MGI:97286	Ncl	MGI:97286			Acetylation; Cytoplasm; DNA-binding; Methylation; Nucleus; Phosphoprotein; Repeat; RNA-binding
9	P52480	Pyruvate kinase PKM OS=Mus musculus GN=Pkm PE=1 SV=4 - [KPYM_MOUSE]	28	36	173	100	6971485	1790546	6226721	4025542	6452041	1686381		4.52545e+06	7.01594e+06	1.67899e+06	6.76996e+06	4.10329e+06	6.85709e+06	1.53565e+06	6.881e+06	2.43931e+06	-2.82088	-1.7679	3.35307e-08	3.19761e-07	FALSE	high	P52480	Pyruvate kinase PKM	Pyruvate kinase muscle isozyme	KPYM_MOUSE	P52480	Q3TBV8; Q3TBW5; Q3TC59; Q3U1X3; Q3U5P6; Q4VC20; Q64484; Q91YI8; Q9CWB1	Pkm	Pk3; Pkm2; Pykm	Mus musculus (Mouse)	10090	P52480	MGI:97591	Pkm	MGI:97591			Acetylation; Allosteric enzyme; Alternative splicing; ATP-binding; Cytoplasm; Glycolysis; Hydroxylation; Kinase; Magnesium; Metal-binding; Nucleotide-binding; Nucleus; Phosphoprotein; Potassium; Pyruvate; Transferase; Ubl conjugation
10	Q8BTM8	Filamin-A OS=Mus musculus GN=Flna PE=1 SV=5 - [FLNA_MOUSE]	81	109	249	129	6143318	2328486	5552928	4615029	5825646	1558735		4337357	6.18249e+06	2.18342e+06	6.03738e+06	4.70416e+06	6.19137e+06	1.41941e+06	6.13708e+06	2.769e+06	-2.21636	-1.44816	6.01114e-06	2.63286e-05	FALSE	high	Q8BTM8	Filamin-A (FLN-A)	Actin-binding protein 280 (ABP-280); Alpha-filamin; Endothelial actin-binding protein; Filamin-1; Non-muscle filamin	FLNA_MOUSE	Q8BTM8	B7FAV0; O54934; Q7TQI1; Q8BLK1; Q8BTN7; Q8VHX5; Q8VHX8; Q99KQ2	Flna	Fln; Fln1	Mus musculus (Mouse)	10090	Q8BTM8	MGI:95556	Flna	MGI:95556			Acetylation; Actin-binding; Alternative splicing; Cilium biogenesis/degradation; Cytoplasm; Cytoskeleton; Isopeptide bond; Phosphoprotein; Repeat; Ubl conjugation
11	P17182	Alpha-enolase OS=Mus musculus GN=Eno1 PE=1 SV=3 - [ENOA_MOUSE]	18	32	362	143	6164391	1731073	5536723	2911294	6497303	1352661		4.03224e+06	6.2037e+06	1.62322e+06	6.01977e+06	2.96752e+06	6.90519e+06	1.23176e+06	6.37622e+06	1.94083e+06	-3.2853	-1.92939	1.31497e-09	2.14693e-08	FALSE	high	P17182	Alpha-enolase	2-phospho-D-glycerate hydro-lyase; Enolase 1; Non-neural enolase (NNE)	ENOA_MOUSE	P17182	Q99KT7; Q9DCY7	Eno1	Eno-1	Mus musculus (Mouse)	10090	P17182	MGI:95393	Eno1	MGI:95393			Acetylation; Cell membrane; Cytoplasm; Glycolysis; Lyase; Magnesium; Membrane; Metal-binding; Phosphoprotein; Ubl conjugation
12	P09411	Phosphoglycerate kinase 1 OS=Mus musculus GN=Pgk1 PE=1 SV=4 - [PGK1_MOUSE]	25	32	115	80	6249219	1358517	5717002	2619302	6491618	1028284		3910657	6.28907e+06	1.27388e+06	6.21577e+06	2.66989e+06	6.89915e+06	936375	6.468e+06	1.62671e+06	-3.97611	-2.25285	4.12682e-12	1.46747e-10	FALSE	high	P09411	Phosphoglycerate kinase 1	na	PGK1_MOUSE	P09411	Q3TPE6; Q3UKV8; Q5XJE7	Pgk1	Pgk-1	Mus musculus (Mouse)	10090	P09411	MGI:97555	Pgk1	MGI:97555			3D-structure; Acetylation; ATP-binding; Cytoplasm; Glycolysis; Kinase; Nucleotide-binding; Phosphoprotein; Transferase
13	P08113	Endoplasmin OS=Mus musculus GN=Hsp90b1 PE=1 SV=2 - [ENPL_MOUSE]	41	52	141	86	2415037	5575756	2031845	4086982	2196176	6454722		3.79342e+06	2.43044e+06	5.22838e+06	2.20911e+06	4.16591e+06	2.33405e+06	5.87779e+06	2.32453e+06	5.09069e+06	2.18999	1.00675	0.000806498	0.00207994	FALSE	high	P08113	Endoplasmin	94 kDa glucose-regulated protein (GRP-94); Endoplasmic reticulum resident protein 99 (ERp99); Heat shock protein 90 kDa beta member 1; Polymorphic tumor rejection antigen 1; Tumor rejection antigen gp96	ENPL_MOUSE	P08113	P11427	Hsp90b1	Grp94; Tra-1; Tra1	Mus musculus (Mouse)	10090	P08113	MGI:98817	Hsp90b1	MGI:98817			Acetylation; ATP-binding; Calcium; Chaperone; Disulfide bond; Endoplasmic reticulum; Glycoprotein; Nucleotide-binding; Phosphoprotein; Signal
14	P38647	Stress-70 protein, mitochondrial OS=Mus musculus GN=Hspa9 PE=1 SV=3 - [GRP75_MOUSE]	32	48	213	93	1724916	5659614	1516822	4219825	1756435	7877468		3.79251e+06	1.73592e+06	5.30701e+06	1.64915e+06	4.30132e+06	1.8667e+06	7.17337e+06	1.75059e+06	5.5939e+06	3.19544	1.53472	4.83791e-07	3.00342e-06	FALSE	high	P38647	Stress-70 protein, mitochondrial	75 kDa glucose-regulated protein (GRP-75); Heat shock 70 kDa protein 9; Mortalin; Peptide-binding protein 74 (PBP74); p66 MOT	GRP75_MOUSE	P38647	Q3TW93; Q3UVN1; Q3V015; Q7TSZ0; Q9CQ05	Hspa9	Grp75; Hsp74; Hspa9a	Mus musculus (Mouse)	10090	P38647	MGI:96245	Hspa9	MGI:96245			Acetylation; ATP-binding; Chaperone; Mitochondrion; Nucleotide-binding; Nucleus; Transit peptide
15	P26443	Glutamate dehydrogenase 1, mitochondrial OS=Mus musculus GN=Glud1 PE=1 SV=1 - [DHE3_MOUSE]	26	41	119	70	1556270	5267272	1319766	4020293	1352688	8346459		3.64379e+06	1.56619e+06	4.93911e+06	1.43491e+06	4.09794e+06	1.43761e+06	7.60044e+06	1.47957e+06	5.54583e+06	3.74827	1.74483	1.83922e-08	1.91974e-07	FALSE	high	P26443	Glutamate dehydrogenase 1, mitochondrial (GDH 1)	na	DHE3_MOUSE	P26443	Q8C273	Glud1	Glud	Mus musculus (Mouse)	10090	P26443	MGI:95753	Glud1	MGI:95753			Acetylation; ADP-ribosylation; ATP-binding; GTP-binding; Mitochondrion; NADP; Nucleotide-binding; Oxidoreductase; Phosphoprotein; Transit peptide
16	P19096	Fatty acid synthase OS=Mus musculus GN=Fasn PE=1 SV=2 - [FAS_MOUSE]	81	108	220	125	4089866	2663250	4519684	3814570	4355599	2019468		3.57707e+06	4.11595e+06	2.49732e+06	4.914e+06	3.88824e+06	4.62903e+06	1.83897e+06	4.55299e+06	2.74151e+06	-1.66076	-0.907844	0.00278634	0.00630609	FALSE	high	P19096	Oleoyl-[acyl-carrier-protein] hydrolase	na	FAS_MOUSE	P19096	B1ATU8; Q6PB72; Q8C4Z0; Q9EQR0	Fasn	na	Mus musculus (Mouse)	10090	P19096	MGI:95485	Fasn	MGI:95485			Acetylation; Cytoplasm; Fatty acid biosynthesis; Fatty acid metabolism; Hydrolase; Lipid biosynthesis; Lipid metabolism; Lyase; Multifunctional enzyme; NAD; NADP; Oxidoreductase; Phosphopantetheine; Phosphoprotein; Pyridoxal phosphate; Transferase
17	Q69ZN7	Myoferlin OS=Mus musculus GN=Myof PE=1 SV=2 - [MYOF_MOUSE]	85	115	227	144	2238234	4902835	2099950	4606670	2158936	4824218		3.47181e+06	2.25251e+06	4.59738e+06	2.28316e+06	4.69564e+06	2.29447e+06	4.39302e+06	2.27671e+06	4.56201e+06	2.00377	0.891599	0.00283073	0.0063962	FALSE	high	Q69ZN7	Myoferlin	Fer-1-like protein 3	MYOF_MOUSE	Q69ZN7	Q7TMG0; Q80V33; Q8BU64; Q8BU70; Q8BUC1; Q8BVY6; Q8C0D1; Q8R3B4	Myof	Fer1l3; Kiaa1207	Mus musculus (Mouse)	10090	Q69ZN7	MGI:1919192	Myof	MGI:1919192			Acetylation; Alternative splicing; Cell membrane; Cytoplasmic vesicle; Membrane; Nucleus; Phosphoprotein; Repeat; Signal-anchor; Transmembrane; Transmembrane helix
18	P16858	Glyceraldehyde-3-phosphate dehydrogenase OS=Mus musculus GN=Gapdh PE=1 SV=2 - [G3P_MOUSE]	18	23	257	133	4103332	4239748	3779516	2706418	4193050	1584697		3.43446e+06	4.1295e+06	3.9756e+06	4.10925e+06	2.75869e+06	4.45628e+06	1.44305e+06	4.23168e+06	2.72578e+06	-1.55246	-0.858472	0.00541253	0.0112878	FALSE	med	P16858	Glyceraldehyde-3-phosphate dehydrogenase (GAPDH)	Peptidyl-cysteine S-nitrosylase GAPDH	G3P_MOUSE	P16858	A6H6A8; Q0QEU0; Q3THM2; Q3TUI2; Q3UMT2; Q4V783; Q569X2; Q569X5; Q5U410	Gapdh	Gapd	Mus musculus (Mouse)	10090	P16858	MGI:95640	Gapdh	MGI:95640			Acetylation; ADP-ribosylation; Apoptosis; Cytoplasm; Cytoskeleton; Glycolysis; Methylation; NAD; Nucleus; Oxidoreductase; Phosphoprotein; S-nitrosylation; Transferase; Translation regulation; Ubl conjugation
19	P11499	Heat shock protein HSP 90-beta OS=Mus musculus GN=Hsp90ab1 PE=1 SV=3 - [HS90B_MOUSE]	29	62	280	74	4016512	2644267	3939065	3245538	3726053	1560210		3.18861e+06	4.04212e+06	2.47952e+06	4.28272e+06	3.30822e+06	3.95997e+06	1.42076e+06	4.09494e+06	2.40283e+06	-1.70421	-0.962402	0.00158829	0.00381919	FALSE	high	P11499	Heat shock protein HSP 90-beta	Heat shock 84 kDa (HSP 84; HSP84); Tumor-specific transplantation 84 kDa antigen (TSTA)	HS90B_MOUSE	P11499	O89078; Q3UIQ7	Hsp90ab1	Hsp84; Hsp84-1; Hspcb	Mus musculus (Mouse)	10090	P11499	MGI:96247	Hsp90ab1	MGI:96247			Acetylation; ATP-binding; Chaperone; Cytoplasm; Glycoprotein; Nucleotide-binding; Phosphoprotein; Stress response; Ubl conjugation
20	Q8VDD5	Myosin-9 OS=Mus musculus GN=Myh9 PE=1 SV=4 - [MYH9_MOUSE]	66	135	279	116	3390934	5134536	3147440	3339125	3135909	928784		3.17945e+06	3.41256e+06	4.81465e+06	3.42203e+06	3.40361e+06	3.33277e+06	845768	3.38912e+06	3.02134e+06	-1.12173	-0.580481	0.0918041	0.138565	FALSE	no	Q8VDD5	Myosin-9	Cellular myosin heavy chain, type A; Myosin heavy chain 9; Myosin heavy chain, non-muscle IIa; Non-muscle myosin heavy chain A (NMMHC-A); Non-muscle myosin heavy chain IIa (NMMHC II-a; NMMHC-IIA)	MYH9_MOUSE	Q8VDD5	Q3UHT9; Q3UHU4; Q6KAN6; Q811I2	Myh9	na	Mus musculus (Mouse)	10090	Q8VDD5	MGI:107717	Myh9	MGI:107717			Acetylation; Actin-binding; ATP-binding; Calmodulin-binding; Cell adhesion; Cell shape; Coiled coil; Cytoplasm; Cytoskeleton; Motor protein; Myosin; Nucleotide-binding; Phosphoprotein; Ubl conjugation
21	Q01853	Transitional endoplasmic reticulum ATPase OS=Mus musculus GN=Vcp PE=1 SV=4 - [TERA_MOUSE]	34	49	159	98	3243927	2724126	3080811	3148017	3182945	3415468		3132549	3.26461e+06	2.55441e+06	3.34959e+06	3.20881e+06	3.38276e+06	3.11019e+06	3.33232e+06	2.9578e+06	-1.12662	-0.289367	0.330881	0.413342	FALSE	no	Q01853	Transitional endoplasmic reticulum ATPase (TER ATPase)	15S Mg(2+)-ATPase p97 subunit; Valosin-containing protein (VCP)	TERA_MOUSE	Q01853	Q3TFH9; Q3TIM2; Q3TXN9; Q6PI18; Q8BSR6; Q8CEG4	Vcp	na	Mus musculus (Mouse)	10090	Q01853	MGI:99919	Vcp	MGI:99919			3D-structure; Acetylation; ATP-binding; Cytoplasm; DNA damage; DNA repair; Endoplasmic reticulum; Hydrolase; Lipid-binding; Methylation; Nucleotide-binding; Nucleus; Phosphoprotein; Transport; Ubl conjugation; Ubl conjugation pathway
22	Q9QXS1	Plectin OS=Mus musculus GN=Plec PE=1 SV=3 - [PLEC_MOUSE]	131	252	388	178	3274645	3010547	3503053	3068259	3446172	2088511		3.0652e+06	3.29553e+06	2.82298e+06	3.80867e+06	3.12752e+06	3.66252e+06	1.90184e+06	3.5889e+06	2.61745e+06	-1.37115	-0.594384	0.0471326	0.0770426	FALSE	low	Q9QXS1	Plectin (PCN; PLTN)	Plectin-1; Plectin-6	PLEC_MOUSE	Q9QXS1	E9QN87; Q6S384; Q6S389; Q6S394; Q9CS65; Q9QUT2; Q9QXQ8; Q9QXQ9; Q9QXR0; Q9QXR1; Q9QXR2; Q9QXR3; Q9QXR4; Q9QXR5; Q9QXR6; Q9QXR7; Q9QXR8; Q9QXR9; Q9QXS0; Q9QXS2; Q9QXS3	Plec	Plec1	Mus musculus (Mouse)	10090	Q9QXS1	MGI:1277961	Plec	MGI:1277961			3D-structure; Acetylation; Actin-binding; Alternative splicing; Cell junction; Coiled coil; Cytoplasm; Cytoskeleton; Phosphoprotein; Repeat
23	P56480	ATP synthase subunit beta, mitochondrial OS=Mus musculus GN=Atp5b PE=1 SV=2 - [ATPB_MOUSE]	27	33	254	116	1175606	4789733	1027997	3307787	1036928	7046092		3.06402e+06	1.1831e+06	4.49132e+06	1.11768e+06	3.37167e+06	1.10202e+06	6.4163e+06	1.13427e+06	4.75977e+06	4.19633	1.90717	8.6549e-10	1.50689e-08	FALSE	high	P56480	ATP synthase subunit beta, mitochondrial	na	ATPB_MOUSE	P56480	Q0QEP4; Q3TFD7; Q3TIP9; Q3TK44; Q3TWD5; Q3TX28; Q3U6U4; Q3U774; Q3UB69; Q3UF69; Q8CI65; Q8VEJ5; Q9CTI7; Q9CWX7	Atp5b	na	Mus musculus (Mouse)	10090	P56480	MGI:107801	Atp5b	MGI:107801			Acetylation; ATP synthesis; ATP-binding; CF(1); Glycoprotein; Hydrogen ion transport; Hydrolase; Ion transport; Membrane; Mitochondrion; Mitochondrion inner membrane; Nucleotide-binding; Phosphoprotein; Transit peptide; Transport
24	P07901	Heat shock protein HSP 90-alpha OS=Mus musculus GN=Hsp90aa1 PE=1 SV=4 - [HS90A_MOUSE]	26	63	238	64	3041497	2658894	2716701	5135886	2455575	2192849		3033567	3.06089e+06	2.49324e+06	2.95372e+06	5.23508e+06	2.60973e+06	1.99685e+06	2.87478e+06	3.24172e+06	1.12764	-0.0683895	0.823497	0.867317	FALSE	no	P07901	Heat shock protein HSP 90-alpha	Heat shock 86 kDa (HSP 86; HSP86); Tumor-specific transplantation 86 kDa antigen (TSTA)	HS90A_MOUSE	P07901	na	Hsp90aa1	Hsp86; Hsp86-1; Hspca	Mus musculus (Mouse)	10090	P07901	MGI:96250	Hsp90aa1	MGI:96250			Acetylation; ATP-binding; Cell membrane; Chaperone; Cytoplasm; Membrane; Nucleotide-binding; Phosphoprotein; S-nitrosylation; Stress response; Ubl conjugation
25	P07356	Annexin A2 OS=Mus musculus GN=Anxa2 PE=1 SV=2 - [ANXA2_MOUSE]	23	29	122	79	2174630	4131010	2246239	4965486	2367992	1500706		2.89768e+06	2.1885e+06	3.87364e+06	2.44221e+06	5.06138e+06	2.51665e+06	1.36657e+06	2.38245e+06	3.43387e+06	1.44132	0.233954	0.464286	0.548485	FALSE	no	P07356	Annexin A2	Annexin II; Annexin-2; Calpactin I heavy chain; Calpactin-1 heavy chain; Chromobindin-8; Lipocortin II; Placental anticoagulant protein IV (PAP-IV); Protein I; p36	ANXA2_MOUSE	P07356	na	Anxa2	Anx2; Cal1h	Mus musculus (Mouse)	10090	P07356	MGI:88246	Anxa2	MGI:88246			3D-structure; Acetylation; Annexin; Basement membrane; Calcium; Calcium/phospholipid-binding; Extracellular matrix; Phosphoprotein; Repeat; Secreted; Ubl conjugation
26	Q03265	ATP synthase subunit alpha, mitochondrial OS=Mus musculus GN=Atp5a1 PE=1 SV=1 - [ATPA_MOUSE]	24	35	164	95	1115720	4697804	1019425	2947145	993924	6175389		2.8249e+06	1.12283e+06	4.40512e+06	1.10836e+06	3.00406e+06	1.05632e+06	5.62343e+06	1.09584e+06	4.3442e+06	3.96427	1.82946	3.5249e-09	4.89752e-08	FALSE	high	Q03265	ATP synthase subunit alpha, mitochondrial	na	ATPA_MOUSE	Q03265	Q3TFN0; Q3THN8; Q3TPR0; Q3TPV3; Q3TZU3; Q3UIR7; Q543Y6	Atp5a1	na	Mus musculus (Mouse)	10090	Q03265	MGI:88115	Atp5a1	MGI:88115			Acetylation; ATP synthesis; ATP-binding; Cell membrane; CF(1); Glycoprotein; Hydrogen ion transport; Ion transport; Membrane; Mitochondrion; Mitochondrion inner membrane; Nucleotide-binding; Phosphoprotein; Pyrrolidone carboxylic acid; Transit peptide; Transport
27	P06151	L-lactate dehydrogenase A chain OS=Mus musculus GN=Ldha PE=1 SV=3 - [LDHA_MOUSE]	19	20	81	48	4088050	996497	3884188	2176947	4184457	760890		2.68184e+06	4.11412e+06	934413	4.22306e+06	2.21899e+06	4.44715e+06	692881	4.26144e+06	1.28209e+06	-3.32381	-2.03685	3.52834e-10	6.92227e-09	FALSE	high	P06151	L-lactate dehydrogenase A chain (LDH-A)	LDH muscle subunit (LDH-M)	LDHA_MOUSE	P06151	na	Ldha	Ldh-1; Ldh1	Mus musculus (Mouse)	10090	P06151	MGI:96759	Ldha	MGI:96759			Acetylation; Cytoplasm; NAD; Oxidoreductase; Phosphoprotein; Ubl conjugation
29	Q68FD5	Clathrin heavy chain 1 OS=Mus musculus GN=Cltc PE=1 SV=3 - [CLH1_MOUSE]	69	79	186	114	2536264	1957047	2430687	2890683	2271065	2178596		2.37739e+06	2.55244e+06	1.83512e+06	2.64275e+06	2.94651e+06	2.41364e+06	1.98387e+06	2.53627e+06	2.25517e+06	-1.12465	-0.311329	0.297848	0.379754	FALSE	no	Q68FD5	Clathrin heavy chain 1	na	CLH1_MOUSE	Q68FD5	na	Cltc	na	Mus musculus (Mouse)	10090	Q68FD5	MGI:2388633	Cltc	MGI:2388633			Acetylation; Coated pit; Cytoplasmic vesicle; Membrane; Phosphoprotein; Repeat
30	P18760	Cofilin-1 OS=Mus musculus GN=Cfl1 PE=1 SV=3 - [COF1_MOUSE]	12	20	73	46	2886375	1164931	3157206	3097372	3008627	840006		2.35909e+06	2.90478e+06	1.09235e+06	3.43265e+06	3.15719e+06	3.1975e+06	764925	3.17831e+06	1.67149e+06	-1.90148	-1.32097	4.51955e-05	0.000157378	FALSE	high	P18760	Cofilin-1	Cofilin, non-muscle isoform	COF1_MOUSE	P18760	na	Cfl1	na	Mus musculus (Mouse)	10090	P18760	MGI:101757	Cfl1	MGI:101757			Acetylation; Actin-binding; Cell membrane; Cell projection; Cytoplasm; Cytoskeleton; Membrane; Nucleus; Phosphoprotein
31	Q9JHU4	Cytoplasmic dynein 1 heavy chain 1 OS=Mus musculus GN=Dync1h1 PE=1 SV=2 - [DYHC1_MOUSE]	124	202	314	150	2198907	2494105	2004387	3018514	2153152	2024091		2315526	2.21293e+06	2.33872e+06	2.17926e+06	3.07681e+06	2.28832e+06	1.84318e+06	2.22684e+06	2.41957e+06	1.08655	-0.0229756	0.93869	0.955079	FALSE	no	Q9JHU4	Cytoplasmic dynein 1 heavy chain 1	Cytoplasmic dynein heavy chain 1; Dynein heavy chain, cytosolic	DYHC1_MOUSE	Q9JHU4	E9QM71	Dync1h1	Dhc1; Dnch1; Dnchc1; Dyhc	Mus musculus (Mouse)	10090	Q9JHU4	MGI:103147	Dync1h1	MGI:103147			3D-structure; Acetylation; ATP-binding; Coiled coil; Cytoplasm; Cytoskeleton; Disease mutation; Dynein; Microtubule; Motor protein; Nucleotide-binding; Phosphoprotein; Repeat; Transport
32	P09103	Protein disulfide-isomerase OS=Mus musculus GN=P4hb PE=1 SV=2 - [PDIA1_MOUSE]	22	34	82	43	1904614	2983044	1484267	2306032	1241036	3729458		2.27474e+06	1.91676e+06	2.79719e+06	1.61376e+06	2.35057e+06	1.31895e+06	3.39611e+06	1.61649e+06	2.84796e+06	1.76182	0.704686	0.0198082	0.0357639	FALSE	med	P09103	Protein disulfide-isomerase (PDI)	Cellular thyroid hormone-binding protein; Endoplasmic reticulum resident protein 59 (ER protein 59; ERp59); Prolyl 4-hydroxylase subunit beta; p55	PDIA1_MOUSE	P09103	Q922C8	P4hb	Pdia1	Mus musculus (Mouse)	10090	P09103	MGI:97464	P4hb	MGI:97464			Acetylation; Cell membrane; Chaperone; Disulfide bond; Endoplasmic reticulum; Isomerase; Membrane; Redox-active center; Repeat; Signal
33	P80316	T-complex protein 1 subunit epsilon OS=Mus musculus GN=Cct5 PE=1 SV=1 - [TCPE_MOUSE]	27	37	123	62	2583893	1632768	2435745	2538346	2782198	1442653		2.23593e+06	2.60037e+06	1.53104e+06	2.64825e+06	2.58737e+06	2.95686e+06	1.31371e+06	2.73516e+06	1.81071e+06	-1.51055	-0.769406	0.0114296	0.0219793	FALSE	med	P80316	T-complex protein 1 subunit epsilon (TCP-1-epsilon)	CCT-epsilon	TCPE_MOUSE	P80316	Q3TIE0; Q3U530; Q3UCU4; Q3UJK9; Q3UWA9; Q542K3; Q6ZQJ1	Cct5	Ccte; Kiaa0098	Mus musculus (Mouse)	10090	P80316	MGI:107185	Cct5	MGI:107185			Acetylation; ATP-binding; Chaperone; Cytoplasm; Cytoskeleton; Nucleotide-binding; Phosphoprotein
34	P08249	Malate dehydrogenase, mitochondrial OS=Mus musculus GN=Mdh2 PE=1 SV=3 - [MDHM_MOUSE]	17	24	89	50	1088175	3078299	861569	2581591	808563	4839591		2.20963e+06	1.09511e+06	2.88652e+06	936735	2.63145e+06	859323	4.40702e+06	963724	3.30833e+06	3.43286	1.63571	1.24636e-07	9.73882e-07	FALSE	high	P08249	Malate dehydrogenase, mitochondrial	na	MDHM_MOUSE	P08249	Q0QF44; Q8CF79; Q8R1P0	Mdh2	Mor1	Mus musculus (Mouse)	10090	P08249	MGI:97050	Mdh2	MGI:97050			Acetylation; Glycoprotein; Mitochondrion; NAD; Oxidoreductase; Transit peptide; Tricarboxylic acid cycle
35	Q01320	DNA topoisomerase 2-alpha OS=Mus musculus GN=Top2a PE=1 SV=2 - [TOP2A_MOUSE]	45	83	178	81	1443323	1557842	1913366	2441778	1732655	4141694		2.20511e+06	1.45253e+06	1.46079e+06	2.08029e+06	2.48894e+06	1.84143e+06	3.7715e+06	1.79142e+06	2.57374e+06	1.43671	0.321339	0.289179	0.370729	FALSE	no	Q01320	DNA topoisomerase 2-alpha	DNA topoisomerase II, alpha isozyme	TOP2A_MOUSE	Q01320	E9PX08	Top2a	Top-2; Top2	Mus musculus (Mouse)	10090	Q01320	MGI:98790	Top2a	MGI:98790			Acetylation; ATP-binding; Biological rhythms; DNA-binding; Isomerase; Magnesium; Metal-binding; Nucleotide-binding; Nucleus; Phosphoprotein; Topoisomerase
37	Q60932	Voltage-dependent anion-selective channel protein 1 OS=Mus musculus GN=Vdac1 PE=1 SV=3 - [VDAC1_MOUSE]	15	17	122	65	787143	3604146	791106	2135608	757650	5049449		2187517	792162	3.3796e+06	860125	2.17685e+06	805214	4.59812e+06	819167	3.38486e+06	4.13207	1.87131	1.86152e-09	2.84312e-08	FALSE	high	Q60932	Voltage-dependent anion-selective channel protein 1 (VDAC-1; mVDAC1)	Outer mitochondrial membrane protein porin 1; Plasmalemmal porin; Voltage-dependent anion-selective channel protein 5 (VDAC-5; mVDAC5)	VDAC1_MOUSE	Q60932	B1ASZ9; Q5SVC6	Vdac1	Vdac5	Mus musculus (Mouse)	10090	Q60932	MGI:106919	Vdac1	MGI:106919			3D-structure; Acetylation; Alternative splicing; Apoptosis; Cell membrane; Ion transport; Membrane; Mitochondrion; Mitochondrion outer membrane; NAD; Nucleotide-binding; Phosphoprotein; Porin; Transmembrane; Transmembrane beta strand; Transport
38	Q8VHX6	Filamin-C OS=Mus musculus GN=Flnc PE=1 SV=3 - [FLNC_MOUSE]	68	112	207	86	2029685	2111597	2190064	2899466	2204682	1442063		2.14626e+06	2.04263e+06	1.98004e+06	2.38113e+06	2.95546e+06	2.34309e+06	1.31317e+06	2.25562e+06	2.08289e+06	-1.08293	-0.299809	0.320619	0.40211	FALSE	no	Q8VHX6	Filamin-C (FLN-C)	ABP-280-like protein; ABP-L; Actin-binding-like protein; Filamin-2; Gamma-filamin	FLNC_MOUSE	Q8VHX6	B2RY80; B9EKT2; Q6PAI6; Q9JJ38	Flnc	Abpl; Fln2	Mus musculus (Mouse)	10090	Q8VHX6	MGI:95557	Flnc	MGI:95557			Actin-binding; Alternative splicing; Cytoplasm; Cytoskeleton; Membrane; Phosphoprotein; Repeat; Ubl conjugation
39	P10107	Annexin A1 OS=Mus musculus GN=Anxa1 PE=1 SV=2 - [ANXA1_MOUSE]	21	28	98	61	2988928	1183874	2633397	2534953	2701825	786440		2.13824e+06	3.00799e+06	1.11012e+06	2.86314e+06	2.58391e+06	2.87144e+06	716147	2.91419e+06	1.47006e+06	-1.98236	-1.31887	4.09462e-05	0.000144066	FALSE	high	P10107	Annexin A1	Annexin I; Annexin-1; Calpactin II; Calpactin-2; Chromobindin-9; Lipocortin I; Phospholipase A2 inhibitory protein; p35	ANXA1_MOUSE	P10107	na	Anxa1	Anx1; Lpc-1; Lpc1	Mus musculus (Mouse)	10090	P10107	MGI:96819	Anxa1	MGI:96819			Acetylation; Annexin; Calcium; Calcium/phospholipid-binding; Cell membrane; Cell projection; Cilium; Cytoplasm; Isopeptide bond; Membrane; Nucleus; Phospholipase A2 inhibitor; Phosphoprotein; Repeat
40	P16045	Galectin-1 OS=Mus musculus GN=Lgals1 PE=1 SV=3 - [LEG1_MOUSE]	7	8	87	54	3157114	1104745	2920806	1385099	3473335	741311		2.1304e+06	3.17725e+06	1.03592e+06	3.17563e+06	1.41185e+06	3.69138e+06	675052	3.34809e+06	1.04094e+06	-3.21641	-1.85627	2.82791e-09	4.03602e-08	FALSE	high	P16045	Galectin-1 (Gal-1)	14 kDa lectin; Beta-galactoside-binding lectin L-14-I; Galaptin; Lactose-binding lectin 1; Lectin galactoside-binding soluble 1; S-Lac lectin 1	LEG1_MOUSE	P16045	P05163; P11946; P17601; Q4FZH4; Q99M27; Q9D0X0	Lgals1	Gbp	Mus musculus (Mouse)	10090	P16045	MGI:96777	Lgals1	MGI:96777			3D-structure; Acetylation; Apoptosis; Extracellular matrix; Lectin; Secreted
41	P27773	Protein disulfide-isomerase A3 OS=Mus musculus GN=Pdia3 PE=1 SV=2 - [PDIA3_MOUSE]	29	39	89	52	1513980	2729436	1217259	2434916	1254173	3487198		2.10616e+06	1.52363e+06	2.55939e+06	1.32346e+06	2.48194e+06	1.33291e+06	3.17551e+06	1.39333e+06	2.73895e+06	1.96575	0.85862	0.0041353	0.00893958	FALSE	high	P27773	Protein disulfide-isomerase A3	58 kDa glucose-regulated protein; 58 kDa microsomal protein (p58); Disulfide isomerase ER-60; Endoplasmic reticulum resident protein 57 (ER protein 57; ERp57); Endoplasmic reticulum resident protein 60 (ER protein 60; ERp60)	PDIA3_MOUSE	P27773	Q3TEI9; Q3TIL2; Q3UZK8; Q8C2F4; Q99LF6	Pdia3	Erp; Erp60; Grp58	Mus musculus (Mouse)	10090	P27773	MGI:95834	Pdia3	MGI:95834			Acetylation; Disulfide bond; Endoplasmic reticulum; Isomerase; Phosphoprotein; Redox-active center; Repeat; Signal
42	P62908	40S ribosomal protein S3 OS=Mus musculus GN=Rps3 PE=1 SV=1 - [RS3_MOUSE]	16	20	42	33	2809890	1467727	2627953	1944509	2688708	838580		2.06289e+06	2.82781e+06	1.37628e+06	2.85722e+06	1.98206e+06	2.8575e+06	763627	2.84751e+06	1.37399e+06	-2.07244	-1.26743	4.04332e-05	0.000142809	FALSE	high	P62908	40S ribosomal protein S3	na	RS3_MOUSE	P62908	P17073; P47933	Rps3	na	Mus musculus (Mouse)	10090	P62908	MGI:1350917	Rps3	MGI:1350917			Acetylation; Apoptosis; Cell cycle; Cell division; Cytoplasm; Cytoskeleton; DNA damage; DNA repair; DNA-binding; Isopeptide bond; Lyase; Membrane; Methylation; Mitochondrion; Mitochondrion inner membrane; Mitosis; Nucleus; Phosphoprotein; Ribonucleoprotein; Ribosomal protein; RNA-binding; Transcription; Transcription regulation; Translation regulation; Ubl conjugation
43	B2RQC6	CAD protein OS=Mus musculus GN=Cad PE=2 SV=1 - [PYR1_MOUSE]	67	90	183	97	1570288	3732100	1422928	1673007	1496323	2252100		2.02446e+06	1.5803e+06	3.49958e+06	1.54707e+06	1.70532e+06	1.59026e+06	2.0508e+06	1.57254e+06	2.41857e+06	1.538	0.44008	0.141058	0.201456	FALSE	no	B2RQC6	Dihydroorotase	na	PYR1_MOUSE	B2RQC6	B7ZN27	Cad	na	Mus musculus (Mouse)	10090	B2RQC6	MGI:1916969	Cad	MGI:1916969			Acetylation; Allosteric enzyme; Alternative splicing; ATP-binding; Cytoplasm; Hydrolase; Ligase; Metal-binding; Multifunctional enzyme; Nucleotide-binding; Nucleus; Phosphoprotein; Pyrimidine biosynthesis; Repeat; Transferase; Zinc
44	P62827	GTP-binding nuclear protein Ran OS=Mus musculus GN=Ran PE=1 SV=3 - [RAN_MOUSE]	12	13	43	37	3121885	1054214	2989581	1231228	2942714	770103		2.01829e+06	3.14179e+06	988535	3.2504e+06	1.25501e+06	3.12745e+06	701270	3.17322e+06	981604	-3.23268	-1.84363	1.99122e-09	2.99467e-08	FALSE	high	P62827	GTP-binding nuclear protein Ran	GTPase Ran; Ras-like protein TC4; Ras-related nuclear protein	RAN_MOUSE	P62827	P17080; P28746; P28747; Q3U954; Q811M2; Q86V08; Q9CSP3; Q9CWI7; Q9CZA2; Q9UDJ5; Q9UEU9	Ran	Rasl2-8	Mus musculus (Mouse)	10090	P62827	MGI:1333112	Ran	MGI:1333112			Acetylation; Cell cycle; Cell division; Cytoplasm; GTP-binding; Isopeptide bond; Mitosis; Nucleotide-binding; Nucleus; Protein transport; Transport; Ubl conjugation
45	Q99KI0	Aconitate hydratase, mitochondrial OS=Mus musculus GN=Aco2 PE=1 SV=1 - [ACON_MOUSE]	30	37	92	63	1027860	2791417	789723	2429582	826668	4201172		2.01107e+06	1.03441e+06	2.61751e+06	858621	2.4765e+06	878564	3.82567e+06	923867	2.97323e+06	3.21824	1.55195	3.979e-07	2.57653e-06	FALSE	high	Q99KI0	Aconitate hydratase, mitochondrial (Aconitase)	Citrate hydro-lyase	ACON_MOUSE	Q99KI0	Q3UDK9; Q3ULG9; Q3UNH7; Q505P4	Aco2	na	Mus musculus (Mouse)	10090	Q99KI0	MGI:87880	Aco2	MGI:87880			4Fe-4S; Acetylation; Iron; Iron-sulfur; Isopeptide bond; Lyase; Metal-binding; Mitochondrion; Phosphoprotein; Pyrrolidone carboxylic acid; Transit peptide; Tricarboxylic acid cycle; Ubl conjugation
46	P14211	Calreticulin OS=Mus musculus GN=Calr PE=1 SV=1 - [CALR_MOUSE]	17	25	91	56	1456378	3162477	1122008	2030592	1067474	3188368		2.00455e+06	1.46566e+06	2.96545e+06	1.2199e+06	2.06981e+06	1.13449e+06	2.90339e+06	1.27335e+06	2.64622e+06	2.07815	0.933906	0.00180963	0.0042851	FALSE	high	P14211	Calreticulin	CRP55; Calregulin; Endoplasmic reticulum resident protein 60 (ERp60); HACBP	CALR_MOUSE	P14211	Q3TVD2	Calr	na	Mus musculus (Mouse)	10090	P14211	MGI:88252	Calr	MGI:88252			3D-structure; Acetylation; Calcium; Chaperone; Disulfide bond; Endoplasmic reticulum; Lectin; Metal-binding; Repeat; Sarcoplasmic reticulum; Signal; Zinc
47	Q61699	Heat shock protein 105 kDa OS=Mus musculus GN=Hsph1 PE=1 SV=2 - [HS105_MOUSE]	34	52	127	65	1009608	2706000	947331	3778544	1018709	2428682		1981479	1.01605e+06	2.53741e+06	1.02998e+06	3.85152e+06	1.08266e+06	2.2116e+06	1.0429e+06	2.86684e+06	2.74893	1.30579	1.71821e-05	6.63744e-05	FALSE	high	Q61699	Heat shock protein 105 kDa	42 degrees C-HSP; Heat shock 110 kDa protein; Heat shock-related 100 kDa protein E7I (HSP-E7I)	HS105_MOUSE	Q61699	Q3TNS2; Q3UIY8; Q62578; Q62579; Q6A0A5; Q8C430; Q8VCW6	Hsph1	Hsp105; Hsp110; Kiaa0201	Mus musculus (Mouse)	10090	Q61699	MGI:105053	Hsph1	MGI:105053			Acetylation; Alternative splicing; ATP-binding; Cytoplasm; Nucleotide-binding; Nucleus; Phosphoprotein; Stress response
48	P14869	60S acidic ribosomal protein P0 OS=Mus musculus GN=Rplp0 PE=1 SV=3 - [RLA0_MOUSE]	13	22	62	37	2294625	2097791	2228866	1518386	2116872	1581361		1.97298e+06	2.30926e+06	1.96709e+06	2.42332e+06	1.54771e+06	2.24976e+06	1.44002e+06	2.32745e+06	1.65161e+06	-1.4092	-0.617944	0.0369766	0.0623359	FALSE	low	P14869	60S acidic ribosomal protein P0	60S ribosomal protein L10E	RLA0_MOUSE	P14869	Q99L54	Rplp0	Arbp	Mus musculus (Mouse)	10090	P14869	MGI:1927636	Rplp0	MGI:1927636			Cytoplasm; Nucleus; Ribonucleoprotein; Ribosomal protein
49	Q91YQ5	Dolichyl-diphosphooligosaccharide--protein glycosyltransferase subunit 1 OS=Mus musculus GN=Rpn1 PE=1 SV=1 - [RPN1_MOUSE]	22	31	67	43	900067	3319041	715171	2145371	748131	3992871		1.97011e+06	905806	3.11226e+06	777565	2.1868e+06	795097	3.63598e+06	826156	2.97835e+06	3.60507	1.71046	2.16791e-08	2.2079e-07	FALSE	high	Q91YQ5	Dolichyl-diphosphooligosaccharide--protein glycosyltransferase subunit 1	Dolichyl-diphosphooligosaccharide--protein glycosyltransferase 67 kDa subunit; Ribophorin I (RPN-I); Ribophorin-1	RPN1_MOUSE	Q91YQ5	Q3U985	Rpn1	na	Mus musculus (Mouse)	10090	Q91YQ5	MGI:98084	Rpn1	MGI:98084			Acetylation; Endoplasmic reticulum; Glycoprotein; Glycosyltransferase; Membrane; Signal; Transferase; Transmembrane; Transmembrane helix
50	P97351	40S ribosomal protein S3a OS=Mus musculus GN=Rps3a PE=1 SV=3 - [RS3A_MOUSE]	15	25	69	32	2690535	1308734	2645093	1639265	2647919	834423		1.96099e+06	2.70769e+06	1.2272e+06	2.87586e+06	1.67092e+06	2.81415e+06	759841	2.79923e+06	1.21932e+06	-2.29573	-1.38181	6.35823e-06	2.75326e-05	FALSE	high	P97351	40S ribosomal protein S3a	Protein TU-11	RS3A_MOUSE	P97351	na	Rps3a	Rps3a1	Mus musculus (Mouse)	10090	P97351	MGI:1202063	Rps3a1	MGI:1202063			Acetylation; Cytoplasm; Differentiation; Nucleus; Phosphoprotein; Ribonucleoprotein; Ribosomal protein
51	Q9D8E6	60S ribosomal protein L4 OS=Mus musculus GN=Rpl4 PE=1 SV=3 - [RL4_MOUSE]	16	28	69	37	2766833	1562235	2607163	1370547	2355834	1065073		1.95461e+06	2.78448e+06	1.4649e+06	2.83462e+06	1.39702e+06	2.50373e+06	969875	2.70761e+06	1.27727e+06	-2.11985	-1.21575	4.95823e-05	0.000171515	FALSE	high	Q9D8E6	60S ribosomal protein L4	na	RL4_MOUSE	Q9D8E6	Q9CY08	Rpl4	na	Mus musculus (Mouse)	10090	Q9D8E6	MGI:1915141	Rpl4	MGI:1915141			Acetylation; Citrullination; Phosphoprotein; Ribonucleoprotein; Ribosomal protein
52	Q60864	Stress-induced-phosphoprotein 1 OS=Mus musculus GN=Stip1 PE=1 SV=1 - [STIP1_MOUSE]	26	40	79	51	2393244	1368317	2330160	1949868	2654518	982825		1.94649e+06	2.4085e+06	1.28307e+06	2.53345e+06	1.98753e+06	2.82116e+06	894979	2.58771e+06	1.38852e+06	-1.86364	-1.08321	0.00040986	0.00112505	FALSE	high	Q60864	Stress-induced-phosphoprotein 1 (STI1; mSTI1)	Hsc70/Hsp90-organizing protein (Hop)	STIP1_MOUSE	Q60864	Q3TT16; Q8BPH3; Q99L66	Stip1	na	Mus musculus (Mouse)	10090	Q60864	MGI:109130	Stip1	MGI:109130			Acetylation; Cytoplasm; Nucleus; Phosphoprotein; Repeat; TPR repeat
53	Q9D8N0	Elongation factor 1-gamma OS=Mus musculus GN=Eef1g PE=1 SV=3 - [EF1G_MOUSE]	19	24	73	47	3032313	1004973	2954974	1333986	2601897	736274		1.94407e+06	3.05165e+06	942361	3.21278e+06	1.35975e+06	2.76524e+06	670465	3.00989e+06	990858	-3.03766	-1.77149	7.9148e-09	9.59841e-08	FALSE	high	Q9D8N0	Elongation factor 1-gamma (EF-1-gamma)	eEF-1B gamma	EF1G_MOUSE	Q9D8N0	Q920C5; Q9CRT5; Q9CSU3; Q9D004	Eef1g	na	Mus musculus (Mouse)	10090	Q9D8N0	MGI:1914410	Eef1g	MGI:1914410			Acetylation; Elongation factor; Protein biosynthesis
54	P24369	Peptidyl-prolyl cis-trans isomerase B OS=Mus musculus GN=Ppib PE=1 SV=2 - [PPIB_MOUSE]	12	17	48	30	1579422	2607803	1380362	1485400	1367049	3223480		1940586	1.58949e+06	2.44533e+06	1.50079e+06	1.51409e+06	1.45287e+06	2.93536e+06	1.51438e+06	2.29826e+06	1.51762	0.438504	0.144435	0.205441	FALSE	no	P24369	Peptidyl-prolyl cis-trans isomerase B (PPIase B)	CYP-S1; Cyclophilin B; Rotamase B; S-cyclophilin (SCYLP)	PPIB_MOUSE	P24369	na	Ppib	na	Mus musculus (Mouse)	10090	P24369	MGI:97750	Ppib	MGI:97750			Acetylation; Cyclosporin; Endoplasmic reticulum; Isomerase; Rotamase; Signal
55	P48678	Prelamin-A/C OS=Mus musculus GN=Lmna PE=1 SV=2 - [LMNA_MOUSE]	19	38	66	36	1981632	1214841	2123242	1406308	2312832	2443789		1913774	1.99427e+06	1.13915e+06	2.30848e+06	1.43347e+06	2.45803e+06	2.22536e+06	2.25359e+06	1.59933e+06	-1.40909	-0.657494	0.0282776	0.0491723	FALSE	med	P48678	Lamin-A/C	na	LMNA_MOUSE	P48678	B3RH23; B3RH24; P11516; P97859; Q3TIH0; Q3TTS8; Q3U733; Q3U7I5; Q3UCA0; Q3UCJ8; Q3UCU3; Q91WF2; Q9DC21	Lmna	Lmn1	Mus musculus (Mouse)	10090	P48678	MGI:96794	Lmna	MGI:96794			3D-structure; Acetylation; Alternative splicing; Coiled coil; Intermediate filament; Isopeptide bond; Lipoprotein; Methylation; Nucleus; Phosphoprotein; Prenylation; Ubl conjugation
56	Q3V3R1	Monofunctional C1-tetrahydrofolate synthase, mitochondrial OS=Mus musculus GN=Mthfd1l PE=1 SV=2 - [C1TM_MOUSE]	36	54	115	69	819398	2939675	631737	2086256	772506	4070915		1.88675e+06	824623	2.75653e+06	686852	2.12655e+06	821002	3.70705e+06	777492	2.86338e+06	3.68283	1.73755	1.22683e-08	1.37275e-07	FALSE	high	Q3V3R1	Monofunctional C1-tetrahydrofolate synthase, mitochondrial	Formyltetrahydrofolate synthetase	C1TM_MOUSE	Q3V3R1	Q3TVQ0; Q3V402; Q80V98; Q8CAL0; Q8K2N5	Mthfd1l	Fthfsdc1	Mus musculus (Mouse)	10090	Q3V3R1	MGI:1924836	Mthfd1l	MGI:1924836			3D-structure; Acetylation; ATP-binding; Ligase; Mitochondrion; Nucleotide-binding; One-carbon metabolism; Transit peptide
57	Q8VDJ3	Vigilin OS=Mus musculus GN=Hdlbp PE=1 SV=1 - [VIGLN_MOUSE]	42	62	112	60	1553708	2984495	1608824	1700918	1550330	1914958		1.88554e+06	1.56362e+06	2.79856e+06	1.74918e+06	1.73377e+06	1.64766e+06	1.7438e+06	1.65349e+06	2.09204e+06	1.26523	0.191673	0.519115	0.601229	FALSE	no	Q8VDJ3	Vigilin	High density lipoprotein-binding protein (HDL-binding protein)	VIGLN_MOUSE	Q8VDJ3	na	Hdlbp	na	Mus musculus (Mouse)	10090	Q8VDJ3	MGI:99256	Hdlbp	MGI:99256			Acetylation; Cholesterol metabolism; Cytoplasm; HDL; Lipid metabolism; Lipid transport; Nucleus; Phosphoprotein; Repeat; RNA-binding; Steroid metabolism; Sterol metabolism; Transport
58	P60710	Actin, cytoplasmic 1 OS=Mus musculus GN=Actb PE=1 SV=1 - [ACTB_MOUSE]	8	27	228	55	2179504	1299692	2029615	2735013	2306619	698310		1.87479e+06	2.1934e+06	1.21872e+06	2.20669e+06	2.78783e+06	2.45142e+06	635894	2.28384e+06	1.54748e+06	-1.47584	-0.937286	0.00507536	0.0106694	FALSE	med	P60710	Actin, cytoplasmic 1, N-terminally processed	Beta-actin	ACTB_MOUSE	P60710	P02570; P70514; P99021; Q11211; Q3TI89; Q3TVP6; Q64316; Q6ZWM3	Actb	na	Mus musculus (Mouse)	10090	P60710	MGI:87904	Actb	MGI:87904			Acetylation; ATP-binding; Cytoplasm; Cytoskeleton; Methylation; Nucleotide-binding; Oxidation; Ubl conjugation
59	P17742	Peptidyl-prolyl cis-trans isomerase A OS=Mus musculus GN=Ppia PE=1 SV=2 - [PPIA_MOUSE]	13	17	66	43	2961957	827500	2672098	1135624	2961418	641414		1.86667e+06	2.98084e+06	775945	2.90522e+06	1.15756e+06	3.14733e+06	584084	3.01113e+06	839195	-3.58812	-2.01219	1.11465e-10	2.64242e-09	FALSE	high	P17742	Peptidyl-prolyl cis-trans isomerase A, N-terminally processed	Cyclophilin A; Cyclosporin A-binding protein; Rotamase A; SP18	PPIA_MOUSE	P17742	Q9CWJ5; Q9R137	Ppia	na	Mus musculus (Mouse)	10090	P17742	MGI:97749	Ppia	MGI:97749			Acetylation; Cyclosporin; Cytoplasm; Glycoprotein; Isomerase; Isopeptide bond; Phosphoprotein; Rotamase; Secreted; Ubl conjugation
60	P12970	60S ribosomal protein L7a OS=Mus musculus GN=Rpl7a PE=2 SV=2 - [RL7A_MOUSE]	18	27	59	32	2652525	1473731	2627978	1378362	2024627	1014374		1.86193e+06	2.66944e+06	1.38191e+06	2.85725e+06	1.40498e+06	2.15173e+06	923708	2.55947e+06	1.23687e+06	-2.06932	-1.17525	8.35274e-05	0.000274027	FALSE	high	P12970	60S ribosomal protein L7a	Surfeit locus protein 3	RL7A_MOUSE	P12970	Q91YM3	Rpl7a	Surf-3; Surf3	Mus musculus (Mouse)	10090	P12970	MGI:1353472	Rpl7a	MGI:1353472			Acetylation; Ribonucleoprotein; Ribosomal protein
61	P80318	T-complex protein 1 subunit gamma OS=Mus musculus GN=Cct3 PE=1 SV=1 - [TCPG_MOUSE]	28	38	93	57	2161425	1690809	2029532	1911502	2204202	1110005		1.85125e+06	2.17521e+06	1.58547e+06	2.2066e+06	1.94842e+06	2.34258e+06	1.01079e+06	2.24146e+06	1.51489e+06	-1.47962	-0.726325	0.0159356	0.0295177	FALSE	med	P80318	T-complex protein 1 subunit gamma (TCP-1-gamma)	CCT-gamma; Matricin; mTRiC-P5	TCPG_MOUSE	P80318	na	Cct3	Cctg	Mus musculus (Mouse)	10090	P80318	MGI:104708	Cct3	MGI:104708			3D-structure; Acetylation; ATP-binding; Chaperone; Cytoplasm; Disulfide bond; Nucleotide-binding; Phosphoprotein
62	P35564	Calnexin OS=Mus musculus GN=Canx PE=1 SV=1 - [CALX_MOUSE]	21	23	86	51	958856	2644236	909571	2139123	911071	3499746		1.84377e+06	964970	2.4795e+06	988925	2.18044e+06	968266	3.18693e+06	974054	2.61562e+06	2.68529	1.29579	1.69688e-05	6.56231e-05	FALSE	high	P35564	Calnexin	na	CALX_MOUSE	P35564	na	Canx	na	Mus musculus (Mouse)	10090	P35564	MGI:88261	Canx	MGI:88261			Acetylation; Calcium; Chaperone; Disulfide bond; Endoplasmic reticulum; Lectin; Lipoprotein; Membrane; Metal-binding; Palmitate; Phosphoprotein; Repeat; Signal; Transmembrane; Transmembrane helix
63	Q8VEK3	Heterogeneous nuclear ribonucleoprotein U OS=Mus musculus GN=Hnrnpu PE=1 SV=1 - [HNRPU_MOUSE]	22	36	84	46	2460247	1649539	2429360	1071750	2586942	830680		1.83809e+06	2.47593e+06	1.54677e+06	2.64131e+06	1.09245e+06	2.74934e+06	756433	2.6222e+06	1.13188e+06	-2.31666	-1.38151	5.86183e-06	2.58636e-05	FALSE	high	Q8VEK3	Heterogeneous nuclear ribonucleoprotein U (hnRNP U)	Scaffold attachment factor A (SAF-A)	HNRPU_MOUSE	Q8VEK3	na	Hnrnpu	Hnrpu	Mus musculus (Mouse)	10090	Q8VEK3	MGI:1858195	Hnrnpu	MGI:1858195			Acetylation; ATP-binding; Biological rhythms; Citrullination; Coiled coil; Cytoplasm; DNA-binding; Methylation; mRNA processing; mRNA splicing; Nucleotide-binding; Nucleus; Phosphoprotein; Ribonucleoprotein; RNA-binding; Spliceosome
64	P80314	T-complex protein 1 subunit beta OS=Mus musculus GN=Cct2 PE=1 SV=4 - [TCPB_MOUSE]	29	35	126	65	2187754	1776147	1977904	1790441	2109211	1147311		1.83146e+06	2.2017e+06	1.66549e+06	2.15046e+06	1.82502e+06	2.24162e+06	1.04476e+06	2.19793e+06	1.51176e+06	-1.45389	-0.690448	0.021178	0.037927	FALSE	med	P80314	T-complex protein 1 subunit beta (TCP-1-beta)	CCT-beta	TCPB_MOUSE	P80314	Q9R1U0	Cct2	Cctb	Mus musculus (Mouse)	10090	P80314	MGI:107186	Cct2	MGI:107186			Acetylation; ATP-binding; Chaperone; Cytoplasm; Nucleotide-binding; Phosphoprotein
65	P29341	Polyadenylate-binding protein 1 OS=Mus musculus GN=Pabpc1 PE=1 SV=2 - [PABP1_MOUSE]	20	33	90	54	1795740	2550948	1800675	890602	1713896	2038634		1.79842e+06	1.80719e+06	2.39202e+06	1.95777e+06	907802	1.82149e+06	1.85642e+06	1.86215e+06	1.71875e+06	-1.08344	-0.330753	0.278708	0.359944	FALSE	no	P29341	Polyadenylate-binding protein 1 (PABP-1; Poly(A)-binding protein 1)	na	PABP1_MOUSE	P29341	Q99L36	Pabpc1	Pabp1	Mus musculus (Mouse)	10090	P29341	MGI:1349722	Pabpc1	MGI:1349722			Acetylation; Cytoplasm; Methylation; mRNA processing; mRNA splicing; Nonsense-mediated mRNA decay; Nucleus; Phosphoprotein; Repeat; RNA-binding; Spliceosome
66	Q8CGC7	Bifunctional glutamate/proline--tRNA ligase OS=Mus musculus GN=Eprs PE=1 SV=4 - [SYEP_MOUSE]	54	76	129	69	2499864	1951748	1808506	1558523	1787763	1099111		1.78425e+06	2.5158e+06	1.83015e+06	1.96629e+06	1.58862e+06	1.89999e+06	1.00087e+06	2.12736e+06	1.47321e+06	-1.44403	-0.674495	0.0233958	0.0414739	FALSE	med	Q8CGC7	Proline--tRNA ligase	Bifunctional aminoacyl-tRNA synthetase; Glutamyl-tRNA synthetase (GluRS); Prolyl-tRNA synthetase (ProRS)	SYEP_MOUSE	Q8CGC7	E9QKC4; Q3UFJ2; Q4VC16	Eprs	Qprs	Mus musculus (Mouse)	10090	Q8CGC7	MGI:97838	Eprs	MGI:97838			Acetylation; Aminoacyl-tRNA synthetase; ATP-binding; Ligase; Multifunctional enzyme; Nucleotide-binding; Phosphoprotein; Polymorphism; Protein biosynthesis; Repeat; RNA-binding; Translation regulation
67	Q9D0R2	Threonine--tRNA ligase, cytoplasmic OS=Mus musculus GN=Tars PE=1 SV=2 - [SYTC_MOUSE]	28	42	99	58	2427964	1601761	1780182	1570562	2286921	1004170		1.77859e+06	2.44345e+06	1.50197e+06	1.93549e+06	1.60089e+06	2.43049e+06	914416	2.26981e+06	1.33909e+06	-1.69503	-0.906345	0.0027891	0.00630893	FALSE	high	Q9D0R2	Threonine--tRNA ligase, cytoplasmic	Threonyl-tRNA synthetase (ThrRS)	SYTC_MOUSE	Q9D0R2	Q3TL42; Q7TMQ2; Q8BMI6; Q9CX03	Tars	na	Mus musculus (Mouse)	10090	Q9D0R2	MGI:106314	Tars	MGI:106314			Acetylation; Aminoacyl-tRNA synthetase; ATP-binding; Cytoplasm; Isopeptide bond; Ligase; Nucleotide-binding; Phosphoprotein; Protein biosynthesis; Ubl conjugation
68	P16546	Spectrin alpha chain, non-erythrocytic 1 OS=Mus musculus GN=Sptan1 PE=1 SV=4 - [SPTN1_MOUSE]	80	129	204	94	1993070	1236258	1794707	2477448	2045847	1077851		1.77086e+06	2.00578e+06	1.15924e+06	1.95128e+06	2.52529e+06	2.17428e+06	981511	2.04378e+06	1.55535e+06	-1.31403	-0.640938	0.0385933	0.064749	FALSE	low	P16546	Spectrin alpha chain, non-erythrocytic 1	Alpha-II spectrin; Fodrin alpha chain	SPTN1_MOUSE	P16546	A3KGU6; A3KGU8; Q8K380; Q9CT05	Sptan1	Spna2; Spta2	Mus musculus (Mouse)	10090	P16546	MGI:98386	Sptan1	MGI:98386			Acetylation; Actin capping; Actin-binding; Alternative splicing; Calcium; Calmodulin-binding; Cytoplasm; Cytoskeleton; Metal-binding; Phosphoprotein; Repeat; SH3 domain
69	Q62167	ATP-dependent RNA helicase DDX3X OS=Mus musculus GN=Ddx3x PE=1 SV=3 - [DDX3X_MOUSE]	25	40	88	43	1400987	3194276	1337070	1406487	1344700	1921122		1.76744e+06	1.40992e+06	2.99527e+06	1.45372e+06	1.43365e+06	1.42912e+06	1.74941e+06	1.43092e+06	2.05944e+06	1.43924	0.341525	0.253566	0.331969	FALSE	no	Q62167	ATP-dependent RNA helicase DDX3X	D1Pas1-related sequence 2; DEAD box RNA helicase DEAD3 (mDEAD3); DEAD box protein 3, X-chromosomal; Embryonic RNA helicase	DDX3X_MOUSE	Q62167	O09060; O09143	Ddx3x	D1Pas1-rs2; Ddx3; Dead3; Erh	Mus musculus (Mouse)	10090	Q62167	MGI:103064	Ddx3x	MGI:103064			Acetylation; Apoptosis; ATP-binding; Chromosome partition; Cytoplasm; DNA-binding; Helicase; Hydrolase; Immunity; Innate immunity; Membrane; Mitochondrion; Mitochondrion outer membrane; Nucleotide-binding; Nucleus; Phosphoprotein; Ribosome biogenesis; RNA-binding; Transcription; Transcription regulation; Translation regulation
70	P63101	14-3-3 protein zeta/delta OS=Mus musculus GN=Ywhaz PE=1 SV=1 - [1433Z_MOUSE]	10	16	54	21	2774756	768811	2537116	1397976	2541997	568385		1.76484e+06	2.79245e+06	720913	2.75846e+06	1.42498e+06	2.70158e+06	517582	2.75083e+06	887823	-3.0984	-1.87998	2.5881e-09	3.73184e-08	FALSE	high	P63101	14-3-3 protein zeta/delta	Protein kinase C inhibitor protein 1 (KCIP-1); SEZ-2	1433Z_MOUSE	P63101	P35215; P70197; P97286; Q3TSF1; Q5EBQ1	Ywhaz	na	Mus musculus (Mouse)	10090	P63101	MGI:109484	Ywhaz	MGI:109484			Acetylation; Cytoplasm; Phosphoprotein
71	P67778	Prohibitin OS=Mus musculus GN=Phb PE=1 SV=1 - [PHB_MOUSE]	16	19	84	55	682469	2977039	623534	1719594	640990	3935247		1.76315e+06	686821	2.79156e+06	677933	1.7528e+06	681230	3.58351e+06	681995	2.70929e+06	3.9726	1.81862	3.73969e-09	5.12319e-08	FALSE	high	P67778	Prohibitin	B-cell receptor-associated protein 32 (BAP 32)	PHB_MOUSE	P67778	P24142; Q3UB75; Q5SQG4	Phb	na	Mus musculus (Mouse)	10090	P67778	MGI:97572	Phb	MGI:97572			Acetylation; Coiled coil; DNA synthesis; Membrane; Mitochondrion; Mitochondrion inner membrane; Phosphoprotein
72	P68040	Guanine nucleotide-binding protein subunit beta-2-like 1 OS=Mus musculus GN=Gnb2l1 PE=1 SV=3 - [GBLP_MOUSE]	18	21	53	35	2099802	1385019	2018098	1499634	1868105	1434275		1.71749e+06	2.11319e+06	1.29873e+06	2.19416e+06	1.5286e+06	1.98538e+06	1.30608e+06	2.09758e+06	1.3778e+06	-1.52241	-0.719834	0.0151883	0.0283371	FALSE	med	P68040	Guanine nucleotide-binding protein subunit beta-2-like 1, N-terminally processed	12-3; Receptor for activated C kinase; Receptor of activated protein kinase C 1 (RACK1); p205	GBLP_MOUSE	P68040	P25388; P99049; Q3THP0; Q3THY7; Q3TKQ0; Q3TW88; Q5NCC5; Q5NCC6; Q9CSQ0; Q9ERM6	Gnb2l1	Gnb2-rs1	Mus musculus (Mouse)	10090	P68040	MGI:101849	Gnb2l1	MGI:101849			Acetylation; Apoptosis; Biological rhythms; Cell cycle; Cell membrane; Cell projection; Cytoplasm; Cytoskeleton; Developmental protein; Gastrulation; Growth regulation; Membrane; Nucleus; Phosphoprotein; Repeat; Translation regulation; WD repeat
73	Q6ZWV3	60S ribosomal protein L10 OS=Mus musculus GN=Rpl10 PE=1 SV=3 - [RL10_MOUSE]	11	20	54	30	2011007	1813378	1913728	1686292	1633767	1194497		1.70878e+06	2.02383e+06	1.7004e+06	2.08069e+06	1.71886e+06	1.73633e+06	1.08773e+06	1.94695e+06	1.50233e+06	-1.29595	-0.511074	0.0839566	0.128792	FALSE	no	Q6ZWV3	60S ribosomal protein L10	Protein QM homolog	RL10_MOUSE	Q6ZWV3	P45634; Q569M8; Q5M9K8	Rpl10	Qm	Mus musculus (Mouse)	10090	Q6ZWV3	MGI:105943	Rpl10	MGI:105943			Citrullination; Isopeptide bond; Ribonucleoprotein; Ribosomal protein; Ubl conjugation
74	Q8BMS1	Trifunctional enzyme subunit alpha, mitochondrial OS=Mus musculus GN=Hadha PE=1 SV=1 - [ECHA_MOUSE]	29	43	96	52	660233	2472605	681395	1804367	679472	3811126		1.68487e+06	664443	2.31856e+06	740842	1.83921e+06	722128	3.47048e+06	709138	2.54275e+06	3.5857	1.68156	4.12299e-08	3.76908e-07	FALSE	high	Q8BMS1	Long chain 3-hydroxyacyl-CoA dehydrogenase	TP-alpha	ECHA_MOUSE	Q8BMS1	Q3TCY3; Q5U5Y5; Q8QZU4	Hadha	na	Mus musculus (Mouse)	10090	Q8BMS1	MGI:2135593	Hadha	MGI:2135593			Acetylation; Fatty acid metabolism; Lipid metabolism; Lyase; Mitochondrion; Multifunctional enzyme; NAD; Oxidoreductase; Transit peptide
75	P62702	40S ribosomal protein S4, X isoform OS=Mus musculus GN=Rps4x PE=2 SV=2 - [RS4X_MOUSE]	16	26	76	42	2725850	1056687	2342661	1329351	1846346	753104		1.67567e+06	2.74323e+06	990853	2.54704e+06	1.35502e+06	1.96226e+06	685791	2.41751e+06	1.01056e+06	-2.39226	-1.41014	3.23257e-06	1.5431e-05	FALSE	high	P62702	40S ribosomal protein S4, X isoform	na	RS4X_MOUSE	P62702	P12631; P12750; P27576; P55831; Q14727; Q9CXN0	Rps4x	Rps4	Mus musculus (Mouse)	10090	P62702	MGI:98158	Rps4x	MGI:98158			Cytoplasm; Ribonucleoprotein; Ribosomal protein; RNA-binding; rRNA-binding
76	P62962	Profilin-1 OS=Mus musculus GN=Pfn1 PE=1 SV=2 - [PROF1_MOUSE]	9	11	54	36	1976624	1468748	2059463	1229964	2368701	894474		1666329	1.98923e+06	1.37724e+06	2.23914e+06	1.25372e+06	2.5174e+06	814525	2.24859e+06	1.1485e+06	-1.95786	-1.10729	0.000251231	0.000724512	FALSE	high	P62962	Profilin-1	Profilin I	PROF1_MOUSE	P62962	P10924	Pfn1	na	Mus musculus (Mouse)	10090	P62962	MGI:97549	Pfn1	MGI:97549			Acetylation; Actin-binding; Cytoplasm; Cytoskeleton; Isopeptide bond; Phosphoprotein; Ubl conjugation
77	P14148	60S ribosomal protein L7 OS=Mus musculus GN=Rpl7 PE=1 SV=2 - [RL7_MOUSE]	20	27	56	35	2064470	1339567	2129515	1232485	2162876	985949		1652477	2.07763e+06	1.25611e+06	2.3153e+06	1.25629e+06	2.29866e+06	897824	2.23053e+06	1.13674e+06	-1.96222	-1.09844	0.000238704	0.000692669	FALSE	high	P14148	60S ribosomal protein L7	na	RL7_MOUSE	P14148	Q80UR0	Rpl7	na	Mus musculus (Mouse)	10090	P14148	MGI:98073	Rpl7	MGI:98073			Acetylation; Phosphoprotein; Repeat; Ribonucleoprotein; Ribosomal protein; RNA-binding
78	Q61937	Nucleophosmin OS=Mus musculus GN=Npm1 PE=1 SV=1 - [NPM_MOUSE]	10	15	55	30	2460926	513591	2779640	431388	3153012	541204		1.64663e+06	2.47662e+06	481593	3.02215e+06	439719	3.35095e+06	492831	2.94991e+06	471381	-6.258	-2.74691	2.41229e-18	3.26516e-16	FALSE	high	Q61937	Nucleophosmin (NPM)	Nucleolar phosphoprotein B23; Nucleolar protein NO38; Numatrin	NPM_MOUSE	Q61937	na	Npm1	na	Mus musculus (Mouse)	10090	Q61937	MGI:106184	Npm1	MGI:106184			3D-structure; Acetylation; ADP-ribosylation; Chaperone; Cytoplasm; Cytoskeleton; Disulfide bond; DNA-binding; Isopeptide bond; Nucleus; Phosphoprotein; RNA-binding; Ubl conjugation
79	Q922Q8	Leucine-rich repeat-containing protein 59 OS=Mus musculus GN=Lrrc59 PE=1 SV=1 - [LRC59_MOUSE]	12	14	38	27	1099202	1866564	1057351	1662102	1060906	3026509		1.62877e+06	1.10621e+06	1.75027e+06	1.1496e+06	1.6942e+06	1.12751e+06	2.756e+06	1.12777e+06	2.06682e+06	1.83266	0.724948	0.0155172	0.0288675	FALSE	med	Q922Q8	Leucine-rich repeat-containing protein 59	na	LRC59_MOUSE	Q922Q8	Q3TJ35; Q3TLC7; Q3TWT9; Q3TX86	Lrrc59	na	Mus musculus (Mouse)	10090	Q922Q8	MGI:2138133	Lrrc59	MGI:2138133			Acetylation; Coiled coil; Endoplasmic reticulum; Leucine-rich repeat; Membrane; Microsome; Nucleus; Phosphoprotein; Repeat; Signal-anchor; Transmembrane; Transmembrane helix
80	P20152	Vimentin OS=Mus musculus GN=Vim PE=1 SV=3 - [VIME_MOUSE]	20	28	64	35	2070318	1227980	2063931	1155045	2072294	991563		1.59686e+06	2.08352e+06	1.15147e+06	2.244e+06	1.17735e+06	2.20239e+06	902936	2.17663e+06	1.07725e+06	-2.02054	-1.1347	0.000142756	0.000439153	FALSE	high	P20152	Vimentin	na	VIME_MOUSE	P20152	O08704; Q8CCH1	Vim	na	Mus musculus (Mouse)	10090	P20152	MGI:98932	Vim	MGI:98932			Acetylation; Coiled coil; Cytoplasm; Glycoprotein; Intermediate filament; Phosphoprotein
81	P05202	Aspartate aminotransferase, mitochondrial OS=Mus musculus GN=Got2 PE=1 SV=1 - [AATM_MOUSE]	23	28	84	49	766019	2157286	695587	1983073	649156	3317296		1.59474e+06	770904	2.02288e+06	756272	2.02137e+06	689909	3.02079e+06	739028	2.35502e+06	3.18664	1.53477	4.8566e-07	3.00342e-06	FALSE	high	P05202	Aspartate aminotransferase, mitochondrial (mAspAT)	Fatty acid-binding protein (FABP-1); Glutamate oxaloacetate transaminase 2; Kynurenine aminotransferase 4; Kynurenine aminotransferase IV; Kynurenine--oxoglutarate transaminase 4; Kynurenine--oxoglutarate transaminase IV; Plasma membrane-associated fatty acid-binding protein (FABPpm); Transaminase A	AATM_MOUSE	P05202	O09188; Q3TIP6; Q3UD91; Q5HZH5	Got2	Got-2	Mus musculus (Mouse)	10090	P05202	MGI:95792	Got2	MGI:95792			3D-structure; Acetylation; Aminotransferase; Cell membrane; Lipid transport; Membrane; Mitochondrion; Nitration; Pyridoxal phosphate; Transferase; Transit peptide; Transport
82	Q7TMK9	Heterogeneous nuclear ribonucleoprotein Q OS=Mus musculus GN=Syncrip PE=1 SV=2 - [HNRPQ_MOUSE]	23	36	72	36	1950324	1735507	1759845	944307	1826272	1351013		1.59454e+06	1.96276e+06	1.62738e+06	1.91338e+06	962544	1.94092e+06	1.23026e+06	1.93902e+06	1.27339e+06	-1.52272	-0.750225	0.0115789	0.0222358	FALSE	med	Q7TMK9	Heterogeneous nuclear ribonucleoprotein Q (hnRNP Q)	Glycine- and tyrosine-rich RNA-binding protein (GRY-RBP); NS1-associated protein 1; Synaptotagmin-binding, cytoplasmic RNA-interacting protein; pp68	HNRPQ_MOUSE	Q7TMK9	O88991; Q2YDV8; Q68ED6; Q80YV6; Q8BGP1; Q8C5K6; Q8CGC2; Q91ZR0; Q99KU9; Q9QYF4	Syncrip	Hnrpq; Nsap1; Nsap1l	Mus musculus (Mouse)	10090	Q7TMK9	MGI:1891690	Syncrip	MGI:1891690			Acetylation; Alternative splicing; Cytoplasm; Isopeptide bond; Methylation; mRNA processing; mRNA splicing; Nucleus; Phosphoprotein; Repeat; Ribonucleoprotein; RNA-binding; Spliceosome; Ubl conjugation
83	P08003	Protein disulfide-isomerase A4 OS=Mus musculus GN=Pdia4 PE=1 SV=3 - [PDIA4_MOUSE]	27	34	80	48	1118296	2106720	918812	1849562	1000493	2558594		1.59208e+06	1.12543e+06	1.97547e+06	998972	1.88528e+06	1.0633e+06	2.3299e+06	1.06257e+06	2.06355e+06	1.94204	0.842663	0.00457508	0.00978237	FALSE	high	P08003	Protein disulfide-isomerase A4	Endoplasmic reticulum resident protein 72 (ER protein 72; ERp-72; ERp72)	PDIA4_MOUSE	P08003	P15841; Q3TT79; Q3UJW0; Q6NXW4; Q8BMT8	Pdia4	Cai; Erp72	Mus musculus (Mouse)	10090	P08003	MGI:104864	Pdia4	MGI:104864			3D-structure; Acetylation; Disulfide bond; Endoplasmic reticulum; Glycoprotein; Isomerase; Redox-active center; Repeat; Signal
84	P40142	Transketolase OS=Mus musculus GN=Tkt PE=1 SV=1 - [TKT_MOUSE]	27	36	81	46	2611824	457192	2327009	866485	2676454	433931		1.56215e+06	2.62848e+06	428708	2.53003e+06	883219	2.84448e+06	395146	2.66766e+06	569024	-4.68813	-2.44435	2.54238e-14	1.64985e-12	FALSE	high	P40142	Transketolase (TK)	P68	TKT_MOUSE	P40142	Q3U7Y1; Q3UK62; Q545A1; Q9ESA0	Tkt	na	Mus musculus (Mouse)	10090	P40142	MGI:105992	Tkt	MGI:105992			Acetylation; Calcium; Magnesium; Metal-binding; Phosphoprotein; Thiamine pyrophosphate; Transferase
85	Q9CWJ9	Bifunctional purine biosynthesis protein PURH OS=Mus musculus GN=Atic PE=1 SV=2 - [PUR9_MOUSE]	25	29	97	57	2183331	1224625	2025344	1045003	2163921	718441		1.56011e+06	2.19725e+06	1.14833e+06	2.20204e+06	1.06519e+06	2.29977e+06	654226	2.23302e+06	955913	-2.33601	-1.37537	5.5355e-06	2.46571e-05	FALSE	high	Q9CWJ9	IMP cyclohydrolase	5-aminoimidazole-4-carboxamide ribonucleotide formyltransferase; AICAR transformylase; ATIC; IMP synthase; Inosinicase	PUR9_MOUSE	Q9CWJ9	Q3UTQ3; Q80UH0; Q8BPF0; Q8BQV9; Q9CRI1; Q9CZW9	Atic	Purh	Mus musculus (Mouse)	10090	Q9CWJ9	MGI:1351352	Atic	MGI:1351352			Acetylation; Hydrolase; Multifunctional enzyme; Purine biosynthesis; Transferase
86	Q61316	Heat shock 70 kDa protein 4 OS=Mus musculus GN=Hspa4 PE=1 SV=1 - [HSP74_MOUSE]	27	50	105	53	2171672	1177562	1952783	1298397	2105700	651063		1.55953e+06	2.18552e+06	1.1042e+06	2.12315e+06	1.32347e+06	2.23789e+06	592870	2.18219e+06	1.00685e+06	-2.16735	-1.30367	2.06668e-05	7.81947e-05	FALSE	high	Q61316	Heat shock 70 kDa protein 4	Heat shock 70-related protein APG-2	HSP74_MOUSE	Q61316	na	Hspa4	Apg2; Hsp110	Mus musculus (Mouse)	10090	Q61316	MGI:1342292	Hspa4	MGI:1342292			Acetylation; ATP-binding; Cytoplasm; Nucleotide-binding; Phosphoprotein; Stress response
87	Q9Z204	Heterogeneous nuclear ribonucleoproteins C1/C2 OS=Mus musculus GN=Hnrnpc PE=1 SV=1 - [HNRPC_MOUSE]	11	26	56	27	2009147	1370179	1838895	668146	1932995	1473533		1.54882e+06	2.02196e+06	1.28481e+06	1.99933e+06	681050	2.05434e+06	1.34183e+06	2.02521e+06	1.10256e+06	-1.83682	-1.04991	0.00050788	0.00136782	FALSE	high	Q9Z204	Heterogeneous nuclear ribonucleoproteins C1/C2 (hnRNP C1/C2)	na	HNRPC_MOUSE	Q9Z204	Q3TLB5; Q501Q3; Q8C2G5; Q99KE2; Q9CQT3; Q9CY83	Hnrnpc	Hnrpc	Mus musculus (Mouse)	10090	Q9Z204	MGI:107795	Hnrnpc	MGI:107795			Acetylation; Alternative splicing; Coiled coil; Isopeptide bond; mRNA processing; mRNA splicing; Nucleus; Phosphoprotein; Ribonucleoprotein; RNA-binding; Spliceosome; Ubl conjugation
88	Q9JKF1	Ras GTPase-activating-like protein IQGAP1 OS=Mus musculus GN=Iqgap1 PE=1 SV=2 - [IQGA1_MOUSE]	61	87	158	86	1701242	1111133	1473098	2589221	1606642	696494		1.52964e+06	1.71209e+06	1.04191e+06	1.60162e+06	2.63923e+06	1.7075e+06	634241	1.67374e+06	1.43846e+06	-1.16356	-0.601482	0.0683918	0.107159	FALSE	no	Q9JKF1	Ras GTPase-activating-like protein IQGAP1	na	IQGA1_MOUSE	Q9JKF1	G3UW45	Iqgap1	na	Mus musculus (Mouse)	10090	Q9JKF1	MGI:1352757	Iqgap1	MGI:1352757			Acetylation; Calmodulin-binding; Cell membrane; Membrane; Phosphoprotein; Repeat
89	Q60930	Voltage-dependent anion-selective channel protein 2 OS=Mus musculus GN=Vdac2 PE=1 SV=2 - [VDAC2_MOUSE]	12	14	72	32	536368	2518341	438176	1557845	566225	3389294		1.50104e+06	539788	2.36144e+06	476404	1.58793e+06	601771	3.08635e+06	539321	2.34524e+06	4.34851	1.96402	1.39645e-10	3.1673e-09	FALSE	high	Q60930	Voltage-dependent anion-selective channel protein 2 (VDAC-2; mVDAC2)	Outer mitochondrial membrane protein porin 2; Voltage-dependent anion-selective channel protein 6 (VDAC-6; mVDAC6)	VDAC2_MOUSE	Q60930	Q78MH6; Q99L98	Vdac2	Vdac6	Mus musculus (Mouse)	10090	Q60930	MGI:106915	Vdac2	MGI:106915			Acetylation; Ion transport; Membrane; Mitochondrion; Mitochondrion outer membrane; NAD; Nucleotide-binding; Porin; Transmembrane; Transmembrane beta strand; Transport
90	Q6NZJ6	Eukaryotic translation initiation factor 4 gamma 1 OS=Mus musculus GN=Eif4g1 PE=1 SV=1 - [IF4G1_MOUSE]	35	68	108	45	1631645	2152938	1574223	927617	1596078	1056859		1.48989e+06	1.64205e+06	2.01881e+06	1.71156e+06	945532	1.69628e+06	962396	1.6833e+06	1.30891e+06	-1.28603	-0.571744	0.0573782	0.091613	FALSE	low	Q6NZJ6	Eukaryotic translation initiation factor 4 gamma 1 (eIF-4-gamma 1; eIF-4G 1; eIF-4G1)	na	IF4G1_MOUSE	Q6NZJ6	Q6NZN8; Q8BW99	Eif4g1	na	Mus musculus (Mouse)	10090	Q6NZJ6	MGI:2384784	Eif4g1	MGI:2384784			Acetylation; Alternative splicing; Initiation factor; Phosphoprotein; Protein biosynthesis; RNA-binding; Translation regulation
91	Q60931	Voltage-dependent anion-selective channel protein 3 OS=Mus musculus GN=Vdac3 PE=1 SV=1 - [VDAC3_MOUSE]	10	16	69	32	890409	2147012	786495	1446454	842549	2823013		1489322	896087	2.01325e+06	855112	1.47439e+06	895442	2.57069e+06	882214	2.01944e+06	2.28906	1.04717	0.000475213	0.00128894	FALSE	high	Q60931	Voltage-dependent anion-selective channel protein 3 (VDAC-3; mVDAC3)	Outer mitochondrial membrane protein porin 3	VDAC3_MOUSE	Q60931	Q8BNG2	Vdac3	na	Mus musculus (Mouse)	10090	Q60931	MGI:106922	Vdac3	MGI:106922			Acetylation; Ion transport; Membrane; Mitochondrion; Mitochondrion outer membrane; NAD; Nucleotide-binding; Phosphoprotein; Porin; Transmembrane; Transmembrane beta strand; Transport
92	Q61753	D-3-phosphoglycerate dehydrogenase OS=Mus musculus GN=Phgdh PE=1 SV=3 - [SERA_MOUSE]	17	24	69	38	1972648	1300451	1753603	1379868	1888156	634711		1.48824e+06	1.98523e+06	1.21943e+06	1.90659e+06	1.40652e+06	2.00669e+06	577980	1.96617e+06	1.06798e+06	-1.84102	-1.08708	0.000388104	0.00106968	FALSE	high	Q61753	D-3-phosphoglycerate dehydrogenase (3-PGDH)	A10	SERA_MOUSE	Q61753	Q3TEE5; Q75SV9; Q8C603	Phgdh	na	Mus musculus (Mouse)	10090	Q61753	MGI:1355330	Phgdh	MGI:1355330			Acetylation; Amino-acid biosynthesis; NAD; Oxidoreductase; Serine biosynthesis
93	P70168	Importin subunit beta-1 OS=Mus musculus GN=Kpnb1 PE=1 SV=2 - [IMB1_MOUSE]	32	39	113	67	1700452	1686053	1599525	1116471	1549425	1108788		1460119	1.7113e+06	1.58101e+06	1.73907e+06	1.13803e+06	1.64669e+06	1.00968e+06	1.69902e+06	1.24291e+06	-1.36697	-0.587958	0.0466618	0.0763325	FALSE	low	P70168	Importin subunit beta-1	Karyopherin subunit beta-1; Nuclear factor p97; Pore targeting complex 97 kDa subunit (PTAC97); SCG	IMB1_MOUSE	P70168	Q62117; Q6GTI5	Kpnb1	Impnb	Mus musculus (Mouse)	10090	P70168	MGI:107532	Kpnb1	MGI:107532			3D-structure; Acetylation; ADP-ribosylation; Cytoplasm; Isopeptide bond; Nucleus; Phosphoprotein; Protein transport; Repeat; Transport; Ubl conjugation
94	Q9CPR4	60S ribosomal protein L17 OS=Mus musculus GN=Rpl17 PE=2 SV=3 - [RL17_MOUSE]	8	14	75	54	1695095	1215915	1678932	1311551	1999171	848851		1.45825e+06	1.7059e+06	1.14016e+06	1.82541e+06	1.33688e+06	2.12467e+06	772980	1.88533e+06	1.08334e+06	-1.74029	-0.93916	0.00183306	0.00432837	FALSE	high	Q9CPR4	60S ribosomal protein L17	na	RL17_MOUSE	Q9CPR4	na	Rpl17	na	Mus musculus (Mouse)	10090	Q9CPR4	MGI:2448270	Rpl17	MGI:2448270			Phosphoprotein; Ribonucleoprotein; Ribosomal protein
95	P42932	T-complex protein 1 subunit theta OS=Mus musculus GN=Cct8 PE=1 SV=3 - [TCPQ_MOUSE]	24	31	75	52	1868145	1235265	1735722	1447796	1779832	676897		1.45728e+06	1.88006e+06	1.15831e+06	1.88715e+06	1.47576e+06	1.89157e+06	616395	1.88626e+06	1.08349e+06	-1.74092	-0.999871	0.00102018	0.00257252	FALSE	high	P42932	T-complex protein 1 subunit theta (TCP-1-theta)	CCT-theta	TCPQ_MOUSE	P42932	na	Cct8	Cctq	Mus musculus (Mouse)	10090	P42932	MGI:107183	Cct8	MGI:107183			Acetylation; ATP-binding; Chaperone; Cytoplasm; Cytoskeleton; Isopeptide bond; Nucleotide-binding; Phosphoprotein; Ubl conjugation
96	Q7TPV4	Myb-binding protein 1A OS=Mus musculus GN=Mybbp1a PE=1 SV=2 - [MBB1A_MOUSE]	47	69	143	62	1892257	1358372	1763587	769484	1555462	1356423		1.44926e+06	1.90432e+06	1.27374e+06	1.91745e+06	784345	1.65311e+06	1.23518e+06	1.82496e+06	1.09776e+06	-1.66244	-0.87353	0.00357521	0.00784602	FALSE	high	Q7TPV4	Myb-binding protein 1A	Myb-binding protein of 160 kDa	MBB1A_MOUSE	Q7TPV4	O35851; Q80Y66; Q8R4X2; Q99KP0	Mybbp1a	P160	Mus musculus (Mouse)	10090	Q7TPV4	MGI:106181	Mybbp1a	MGI:106181			Acetylation; Activator; Biological rhythms; Citrullination; Cytoplasm; Nucleus; Phosphoprotein; Repressor; Transcription; Transcription regulation
97	Q8BKC5	Importin-5 OS=Mus musculus GN=Ipo5 PE=1 SV=3 - [IPO5_MOUSE]	37	48	151	69	1931262	1022612	1917603	1069711	1869293	873892		1.4474e+06	1.94358e+06	958901	2.0849e+06	1.09037e+06	1.98664e+06	795782	2.00504e+06	948351	-2.11424	-1.20211	5.65588e-05	0.000194048	FALSE	high	Q8BKC5	Importin-5 (Imp5)	Importin subunit beta-3; Karyopherin beta-3; Ran-binding protein 5 (RanBP5)	IPO5_MOUSE	Q8BKC5	Q3TEG2; Q7TQC6; Q9EQ30	Ipo5	Kpnb3; Ranbp5	Mus musculus (Mouse)	10090	Q8BKC5	MGI:1917822	Ipo5	MGI:1917822			Acetylation; Alternative splicing; Cytoplasm; Nucleus; Phosphoprotein; Protein transport; Repeat; Transport
98	P50247	Adenosylhomocysteinase OS=Mus musculus GN=Ahcy PE=1 SV=3 - [SAHH_MOUSE]	18	28	73	42	2155211	474386	2140176	961484	2512667	410100		1.44234e+06	2.16895e+06	444831	2.32689e+06	980053	2.67041e+06	373445	2.38875e+06	599443	-3.98495	-2.24111	2.88039e-12	1.0419e-10	FALSE	high	P50247	Adenosylhomocysteinase (AdoHcyase)	CUBP; Liver copper-binding protein; S-adenosyl-L-homocysteine hydrolase	SAHH_MOUSE	P50247	Q91WF1	Ahcy	na	Mus musculus (Mouse)	10090	P50247	MGI:87968	Ahcy	MGI:87968			Acetylation; Cytoplasm; Hydrolase; NAD; One-carbon metabolism
99	P10639	Thioredoxin OS=Mus musculus GN=Txn PE=1 SV=3 - [THIO_MOUSE]	7	9	84	41	2130599	658519	2114202	989210	2098215	587988		1.42979e+06	2.14418e+06	617492	2.29865e+06	1.00831e+06	2.22994e+06	535433	2.22426e+06	720413	-3.08748	-1.79317	5.21321e-09	6.64882e-08	FALSE	high	P10639	Thioredoxin (Trx)	ATL-derived factor (ADF)	THIO_MOUSE	P10639	Q52KC4; Q9D8R0	Txn	Txn1	Mus musculus (Mouse)	10090	P10639	MGI:98874	Txn1	MGI:98874			Acetylation; Activator; Cytoplasm; Disulfide bond; Electron transport; Nucleus; Redox-active center; S-nitrosylation; Secreted; Transcription; Transcription regulation; Transport
100	Q62351	Transferrin receptor protein 1 OS=Mus musculus GN=Tfrc PE=1 SV=1 - [TFR1_MOUSE]	23	32	73	44	657943	1889934	888403	2611991	677944	1788348		1.41909e+06	662138	1.77219e+06	965910	2.66244e+06	720504	1.6285e+06	782851	2.02104e+06	2.58164	1.24255	3.08911e-05	0.000112127	FALSE	high	Q62351	Transferrin receptor protein 1 (TR; TfR; TfR1; Trfr)	CD_antigen=CD71	TFR1_MOUSE	Q62351	Q61560	Tfrc	Trfr	Mus musculus (Mouse)	10090	Q62351	MGI:98822	Tfrc	MGI:98822			Cell membrane; Disulfide bond; Endocytosis; Glycoprotein; Lipoprotein; Membrane; Palmitate; Phosphoprotein; Receptor; Signal-anchor; Transmembrane; Transmembrane helix
101	P35700	Peroxiredoxin-1 OS=Mus musculus GN=Prdx1 PE=1 SV=1 - [PRDX1_MOUSE]	10	12	44	28	1831752	751706	1836405	1541629	1942301	609014		1.4188e+06	1.84343e+06	704873	1.99662e+06	1.5714e+06	2.06423e+06	554580	1.9681e+06	943618	-2.08569	-1.32686	2.13237e-05	8.0318e-05	FALSE	high	P35700	Peroxiredoxin-1	Macrophage 23 kDa stress protein; Osteoblast-specific factor 3 (OSF-3); Thioredoxin peroxidase 2; Thioredoxin-dependent peroxide reductase 2	PRDX1_MOUSE	P35700	Q3UBV4; Q9CWI2	Prdx1	Msp23; Paga; Tdpx2	Mus musculus (Mouse)	10090	P35700	MGI:99523	Prdx1	MGI:99523			Acetylation; Antioxidant; Cytoplasm; Disulfide bond; Oxidoreductase; Peroxidase; Phosphoprotein; Redox-active center
102	P23116	Eukaryotic translation initiation factor 3 subunit A OS=Mus musculus GN=Eif3a PE=1 SV=5 - [EIF3A_MOUSE]	36	62	123	56	1815099	1234016	1600459	1178825	1598365	1052620		1.41323e+06	1.82667e+06	1.15713e+06	1.74009e+06	1.20159e+06	1.69871e+06	958536	1.75516e+06	1.10575e+06	-1.58729	-0.783475	0.00809742	0.0160355	FALSE	med	P23116	Eukaryotic translation initiation factor 3 subunit A (eIF3a)	Centrosomin; Eukaryotic translation initiation factor 3 subunit 10; eIF-3-theta; eIF3 p167; eIF3 p180; eIF3 p185; p162	EIF3A_MOUSE	P23116	E9QQ50; Q60697; Q62162	Eif3a	Csma; Eif3; Eif3s10	Mus musculus (Mouse)	10090	P23116	MGI:95301	Eif3a	MGI:95301			Acetylation; Coiled coil; Cytoplasm; Cytoskeleton; Initiation factor; Nucleus; Phosphoprotein; Protein biosynthesis; Repeat; RNA editing
103	P99027	60S acidic ribosomal protein P2 OS=Mus musculus GN=Rplp2 PE=1 SV=3 - [RLA2_MOUSE]	8	9	33	25	1580082	1413190	1522581	1184352	1547847	1206734		1409131	1.59016e+06	1.32515e+06	1.65542e+06	1.20723e+06	1.64502e+06	1.09887e+06	1.6302e+06	1.21042e+06	-1.34681	-0.544136	0.0646142	0.10181	FALSE	no	P99027	60S acidic ribosomal protein P2	na	RLA2_MOUSE	P99027	Q3TKY3; Q9CQ99; Q9CZJ8	Rplp2	na	Mus musculus (Mouse)	10090	P99027	MGI:1914436	Rplp2	MGI:1914436			Acetylation; Phosphoprotein; Ribonucleoprotein; Ribosomal protein
104	Q9WVA4	Transgelin-2 OS=Mus musculus GN=Tagln2 PE=1 SV=4 - [TAGL2_MOUSE]	10	16	49	30	2430322	384068	2254750	845688	2225360	263533		1.40062e+06	2.44582e+06	360140	2.45146e+06	862021	2.36506e+06	239978	2.42078e+06	487380	-4.96693	-2.64563	1.34671e-15	1.2023e-13	FALSE	high	Q9WVA4	Transgelin-2	SM22-beta	TAGL2_MOUSE	Q9WVA4	Q3TIB8; Q6A0C6; Q78ZX2; Q91VU2	Tagln2	Kiaa0120	Mus musculus (Mouse)	10090	Q9WVA4	MGI:1312985	Tagln2	MGI:1312985			Acetylation; Phosphoprotein
105	Q922D8	C-1-tetrahydrofolate synthase, cytoplasmic OS=Mus musculus GN=Mthfd1 PE=1 SV=4 - [C1TC_MOUSE]	34	52	82	50	1652475	1590302	1572420	1335191	1567773	673925		1398681	1.66301e+06	1.49122e+06	1.7096e+06	1.36098e+06	1.66619e+06	613689	1.6796e+06	1.1553e+06	-1.45383	-0.749127	0.0134495	0.0254323	FALSE	med	Q922D8	C-1-tetrahydrofolate synthase, cytoplasmic, N-terminally processed (C1-THF synthase)	na	C1TC_MOUSE	Q922D8	Q8R013	Mthfd1	na	Mus musculus (Mouse)	10090	Q922D8	MGI:1342005	Mthfd1	MGI:1342005			Acetylation; Amino-acid biosynthesis; ATP-binding; Cytoplasm; Histidine biosynthesis; Hydrolase; Ligase; Methionine biosynthesis; Multifunctional enzyme; NADP; Nucleotide-binding; One-carbon metabolism; Oxidoreductase; Purine biosynthesis
106	Q9JIK5	Nucleolar RNA helicase 2 OS=Mus musculus GN=Ddx21 PE=1 SV=3 - [DDX21_MOUSE]	26	39	84	53	1836669	1048864	1787587	768488	1747863	1172531		1393667	1.84838e+06	983518	1.94354e+06	783330	1.85759e+06	1.06773e+06	1.88317e+06	944859	-1.99307	-1.11738	0.000181719	0.000539246	FALSE	high	Q9JIK5	Nucleolar RNA helicase 2	DEAD box protein 21; Gu-alpha; Nucleolar RNA helicase Gu; Nucleolar RNA helicase II; RH II/Gu	DDX21_MOUSE	Q9JIK5	Q3TVJ3; Q9WV45	Ddx21	na	Mus musculus (Mouse)	10090	Q9JIK5	MGI:1860494	Ddx21	MGI:1860494			3D-structure; Acetylation; ATP-binding; Helicase; Hydrolase; Nucleotide-binding; Nucleus; Phosphoprotein; Repeat; RNA-binding
107	Q99K85	Phosphoserine aminotransferase OS=Mus musculus GN=Psat1 PE=1 SV=1 - [SERC_MOUSE]	19	24	74	48	2057038	754848	1697626	961714	2120277	606752		1.36638e+06	2.07015e+06	707820	1.84573e+06	980288	2.25338e+06	552520	2.05642e+06	746876	-2.75337	-1.609	1.62275e-07	1.20942e-06	FALSE	high	Q99K85	Phosphoserine aminotransferase (PSAT)	Endometrial progesterone-induced protein (EPIP); Phosphohydroxythreonine aminotransferase	SERC_MOUSE	Q99K85	na	Psat1	Psa; Psat	Mus musculus (Mouse)	10090	Q99K85	MGI:2183441	Psat1	MGI:2183441			Acetylation; Amino-acid biosynthesis; Aminotransferase; Pyridoxal phosphate; Serine biosynthesis; Transferase
108	P80315	T-complex protein 1 subunit delta OS=Mus musculus GN=Cct4 PE=1 SV=3 - [TCPD_MOUSE]	21	33	95	40	1606992	1396084	1532691	1207463	1507205	914537		1.36083e+06	1.61724e+06	1.30911e+06	1.66641e+06	1.23078e+06	1.60182e+06	832795	1.62849e+06	1.12423e+06	-1.44854	-0.672239	0.0232312	0.041217	FALSE	med	P80315	T-complex protein 1 subunit delta (TCP-1-delta)	A45; CCT-delta	TCPD_MOUSE	P80315	na	Cct4	Cctd	Mus musculus (Mouse)	10090	P80315	MGI:104689	Cct4	MGI:104689			Acetylation; ATP-binding; Chaperone; Cytoplasm; Cytoskeleton; Nucleotide-binding
109	P14206	40S ribosomal protein SA OS=Mus musculus GN=Rpsa PE=1 SV=4 - [RSSA_MOUSE]	13	15	42	31	1831376	843468	1854163	1058715	1819669	740146		1.35792e+06	1.84305e+06	790918	2.01593e+06	1.07916e+06	1.9339e+06	673991	1.93096e+06	848024	-2.27701	-1.32528	1.03367e-05	4.23321e-05	FALSE	high	P14206	40S ribosomal protein SA	37 kDa laminin receptor precursor (37LRP); 37 kDa oncofetal antigen; 37/67 kDa laminin receptor (LRP/LR); 67 kDa laminin receptor (67LR); Laminin receptor 1 (LamR); Laminin-binding protein precursor p40 (LBP/p40); OFA/iLRP	RSSA_MOUSE	P14206	Q58E74; Q8BHL0; Q8BNL2; Q91V31; Q9CY13	Rpsa	Lamr1; P40-8	Mus musculus (Mouse)	10090	P14206	MGI:105381	Rpsa	MGI:105381			Acetylation; Cell membrane; Cytoplasm; Membrane; Nucleus; Phosphoprotein; Receptor; Repeat; Ribonucleoprotein; Ribosomal protein
110	P57780	Alpha-actinin-4 OS=Mus musculus GN=Actn4 PE=1 SV=1 - [ACTN4_MOUSE]	24	53	108	39	1667586	715542	1523874	2132521	1564927	533437		1.35631e+06	1.67822e+06	670962	1.65682e+06	2.17371e+06	1.66317e+06	485758	1.66607e+06	1.11014e+06	-1.50077	-1.03617	0.00243806	0.0055994	FALSE	high	P57780	Alpha-actinin-4	Non-muscle alpha-actinin 4	ACTN4_MOUSE	P57780	na	Actn4	na	Mus musculus (Mouse)	10090	P57780	MGI:1890773	Actn4	MGI:1890773			Acetylation; Actin-binding; Calcium; Cell junction; Cytoplasm; Metal-binding; Nucleus; Protein transport; Repeat; Transport
111	Q9CPY7	Cytosol aminopeptidase OS=Mus musculus GN=Lap3 PE=1 SV=3 - [AMPL_MOUSE]	20	28	74	43	1181213	1435717	1069448	1495156	886254	1948457		1.33604e+06	1.18875e+06	1.34627e+06	1.16275e+06	1.52403e+06	941891	1.7743e+06	1.0978e+06	1.5482e+06	1.41028	0.383448	0.198256	0.269305	FALSE	no	Q9CPY7	Cytosol aminopeptidase	Leucine aminopeptidase 3 (LAP-3); Leucyl aminopeptidase; Proline aminopeptidase; Prolyl aminopeptidase	AMPL_MOUSE	Q9CPY7	Q3TFS5; Q4FJV1; Q4FK15; Q99P44; Q9CWN8	Lap3	Lapep	Mus musculus (Mouse)	10090	Q9CPY7	MGI:1914238	Lap3	MGI:1914238			Acetylation; Alternative initiation; Aminopeptidase; Cytoplasm; Hydrolase; Magnesium; Manganese; Metal-binding; Phosphoprotein; Protease; Zinc
112	P60843	Eukaryotic initiation factor 4A-I OS=Mus musculus GN=Eif4a1 PE=1 SV=1 - [IF4A1_MOUSE]	15	38	158	39	1122420	2164265	1095080	1200521	954002	1398854		1.32252e+06	1.12958e+06	2.02943e+06	1.19062e+06	1.22371e+06	1.01389e+06	1.27382e+06	1.11136e+06	1.50899e+06	1.35778	0.294065	0.319571	0.401353	FALSE	no	P60843	Eukaryotic initiation factor 4A-I (eIF-4A-I; eIF4A-I)	ATP-dependent RNA helicase eIF4A-1	IF4A1_MOUSE	P60843	P04765; Q61516	Eif4a1	Ddx2a; Eif4a	Mus musculus (Mouse)	10090	P60843	MGI:95303	Eif4a1	MGI:95303			Acetylation; ATP-binding; Helicase; Hydrolase; Initiation factor; Nucleotide-binding; Phosphoprotein; Protein biosynthesis; RNA-binding
113	Q8BP47	Asparagine--tRNA ligase, cytoplasmic OS=Mus musculus GN=Nars PE=1 SV=2 - [SYNC_MOUSE]	20	29	67	37	1983253	1205212	1256910	1359642	1526458	596498		1.32133e+06	1.9959e+06	1.13013e+06	1.36657e+06	1.3859e+06	1.62229e+06	543182	1.66158e+06	1.01974e+06	-1.62943	-0.907215	0.00332566	0.00735608	FALSE	high	Q8BP47	Asparagine--tRNA ligase, cytoplasmic	Asparaginyl-tRNA synthetase (AsnRS)	SYNC_MOUSE	Q8BP47	Q3T9A7; Q7TPX0; Q9CRY5	Nars	na	Mus musculus (Mouse)	10090	Q8BP47	MGI:1917473	Nars	MGI:1917473			Acetylation; Aminoacyl-tRNA synthetase; ATP-binding; Cytoplasm; Ligase; Nucleotide-binding; Phosphoprotein; Protein biosynthesis
114	P25444	40S ribosomal protein S2 OS=Mus musculus GN=Rps2 PE=2 SV=3 - [RS2_MOUSE]	18	24	66	33	1646714	1043955	1648973	1265158	1649659	564141		1303100	1.65721e+06	978915	1.79284e+06	1.28959e+06	1.75322e+06	513717	1.73442e+06	927408	-1.87018	-1.11053	0.00027302	0.000778256	FALSE	high	P25444	40S ribosomal protein S2	40S ribosomal protein S4; Protein LLRep3	RS2_MOUSE	P25444	na	Rps2	Llrep3; Rps4	Mus musculus (Mouse)	10090	P25444	MGI:105110	Rps2	MGI:105110			Acetylation; Citrullination; Phosphoprotein; Repeat; Ribonucleoprotein; Ribosomal protein
115	P50580	Proliferation-associated protein 2G4 OS=Mus musculus GN=Pa2g4 PE=1 SV=3 - [PA2G4_MOUSE]	19	24	73	37	1962748	874360	1608712	1003511	1513944	750488		1.28563e+06	1.97526e+06	819886	1.74906e+06	1.02289e+06	1.60899e+06	683408	1.77777e+06	842062	-2.11121	-1.20352	5.92275e-05	0.000201393	FALSE	high	P50580	Proliferation-associated protein 2G4	IRES-specific cellular trans-acting factor 45 kDa (ITAF45); Mpp1; Proliferation-associated protein 1; Protein p38-2G4	PA2G4_MOUSE	P50580	na	Pa2g4	Ebp1; Plfap	Mus musculus (Mouse)	10090	P50580	MGI:894684	Pa2g4	MGI:894684			3D-structure; Acetylation; Alternative splicing; Cytoplasm; Nucleus; Phosphoprotein; Repressor; Ribonucleoprotein; RNA-binding; rRNA processing; Transcription; Transcription regulation; Translation regulation; Ubl conjugation
116	Q8BFR5	Elongation factor Tu, mitochondrial OS=Mus musculus GN=Tufm PE=1 SV=1 - [EFTU_MOUSE]	21	28	66	37	590376	1833792	549942	1549869	494211	2676357		1.28242e+06	594141	1.71954e+06	597921	1.5798e+06	525237	2.43714e+06	572433	1.91216e+06	3.34041	1.6039	1.41949e-07	1.08491e-06	FALSE	high	Q8BFR5	Elongation factor Tu, mitochondrial	na	EFTU_MOUSE	Q8BFR5	Q497E7; Q6P919	Tufm	na	Mus musculus (Mouse)	10090	Q8BFR5	MGI:1923686	Tufm	MGI:1923686			Acetylation; Alternative splicing; Elongation factor; GTP-binding; Mitochondrion; Nucleotide-binding; Protein biosynthesis; Transit peptide
117	Q6P5E4	UDP-glucose:glycoprotein glucosyltransferase 1 OS=Mus musculus GN=Uggt1 PE=1 SV=4 - [UGGG1_MOUSE]	49	64	113	64	915379	1836697	701229	1328423	775379	2134399		1.28192e+06	921216	1.72227e+06	762407	1.35408e+06	824056	1.94362e+06	835893	1.67332e+06	2.00184	0.87887	0.00306222	0.00684919	FALSE	high	Q6P5E4	UDP-glucose:glycoprotein glucosyltransferase 1 (UGT1)	UDP--Glc:glycoprotein glucosyltransferase; UDP-glucose ceramide glucosyltransferase-like 1	UGGG1_MOUSE	Q6P5E4	E9QQ49; Q6NV70	Uggt1	Gt; Ugcgl1; Uggt; Ugt1; Ugtr	Mus musculus (Mouse)	10090	Q6P5E4	MGI:2443162	Uggt1	MGI:2443162			Endoplasmic reticulum; Glycoprotein; Glycosyltransferase; Phosphoprotein; Signal; Transferase
118	P26039	Talin-1 OS=Mus musculus GN=Tln1 PE=1 SV=2 - [TLN1_MOUSE]	65	108	192	81	1721923	705091	1641964	1326292	1718438	564256		1.27966e+06	1.7329e+06	661163	1.78521e+06	1.35191e+06	1.82632e+06	513822	1.78148e+06	842297	-2.11502	-1.3233	1.94398e-05	7.4154e-05	FALSE	high	P26039	Talin-1	na	TLN1_MOUSE	P26039	A2AIM8; Q8VEF0	Tln1	Tln	Mus musculus (Mouse)	10090	P26039	MGI:1099832	Tln1	MGI:1099832			3D-structure; Acetylation; Cell junction; Cell membrane; Cell projection; Cytoplasm; Cytoskeleton; Membrane; Phosphoprotein
119	P47738	Aldehyde dehydrogenase, mitochondrial OS=Mus musculus GN=Aldh2 PE=1 SV=1 - [ALDH2_MOUSE]	19	31	80	48	547343	1839492	448779	1613639	547895	2649083		1.27437e+06	550833	1.72489e+06	487932	1.6448e+06	582291	2.4123e+06	540352	1.92733e+06	3.56681	1.70621	1.74177e-08	1.82712e-07	FALSE	high	P47738	Aldehyde dehydrogenase, mitochondrial	AHD-M1; ALDH class 2; ALDH-E2; ALDHI	ALDH2_MOUSE	P47738	na	Aldh2	Ahd-1; Ahd1	Mus musculus (Mouse)	10090	P47738	MGI:99600	Aldh2	MGI:99600			Acetylation; Mitochondrion; NAD; Oxidoreductase; Transit peptide
120	Q91W50	Cold shock domain-containing protein E1 OS=Mus musculus GN=Csde1 PE=2 SV=1 - [CSDE1_MOUSE]	25	37	69	40	1019418	2061853	1166551	1095867	1049944	1248109		1.27362e+06	1.02592e+06	1.9334e+06	1.26832e+06	1.11703e+06	1.11586e+06	1.13655e+06	1.1367e+06	1.39566e+06	1.22782	0.140587	0.636919	0.707575	FALSE	no	Q91W50	Cold shock domain-containing protein E1	na	CSDE1_MOUSE	Q91W50	na	Csde1	D3Jfr1	Mus musculus (Mouse)	10090	Q91W50	MGI:92356	Csde1	MGI:92356			Acetylation; Cytoplasm; Phosphoprotein; Repeat; RNA-binding
121	Q9JKR6	Hypoxia up-regulated protein 1 OS=Mus musculus GN=Hyou1 PE=1 SV=1 - [HYOU1_MOUSE]	28	44	87	47	870098	1885721	728686	1237538	760647	2016064		1.24979e+06	875646	1.76824e+06	792259	1.26144e+06	808399	1.83587e+06	825435	1.62185e+06	1.96484	0.845294	0.00434841	0.00933297	FALSE	high	Q9JKR6	Hypoxia up-regulated protein 1 (GRP-170)	140 kDa Ca(2+)-binding protein (CBP-140)	HYOU1_MOUSE	Q9JKR6	Q3TAL1; Q3TZD0; Q3U1U2; Q64139; Q80X75	Hyou1	Grp170	Mus musculus (Mouse)	10090	Q9JKR6	MGI:108030	Hyou1	MGI:108030			Acetylation; ATP-binding; Chaperone; Endoplasmic reticulum; Glycoprotein; Nucleotide-binding; Signal; Stress response
122	P11983	T-complex protein 1 subunit alpha OS=Mus musculus GN=Tcp1 PE=1 SV=3 - [TCPA_MOUSE]	22	30	75	46	1468521	1191024	1387485	1222388	1387718	816481		1.2456e+06	1.47789e+06	1.11682e+06	1.50853e+06	1.246e+06	1.47484e+06	743503	1.48709e+06	1.03544e+06	-1.43619	-0.666496	0.0247399	0.0435987	FALSE	med	P11983	T-complex protein 1 subunit alpha (TCP-1-alpha)	CCT-alpha; Tailless complex polypeptide 1A (TCP-1-A); Tailless complex polypeptide 1B (TCP-1-B)	TCPA_MOUSE	P11983	P11984; Q3TJ96; Q3TKU1; Q3U5T8; Q3U7I8; Q3UAA8; Q3UB80; Q3UE48	Tcp1	Cct1; Ccta	Mus musculus (Mouse)	10090	P11983	MGI:98535	Tcp1	MGI:98535			Acetylation; Alternative splicing; ATP-binding; Chaperone; Cytoplasm; Cytoskeleton; Nucleotide-binding; Phosphoprotein
123	Q8QZT1	Acetyl-CoA acetyltransferase, mitochondrial OS=Mus musculus GN=Acat1 PE=1 SV=1 - [THIL_MOUSE]	14	19	39	22	529919	1818771	469792	1310430	497272	2812222		1.23973e+06	533298	1.70546e+06	510778	1.33574e+06	528490	2.56086e+06	524189	1.86735e+06	3.56237	1.66787	4.63288e-08	4.17158e-07	FALSE	high	Q8QZT1	Acetyl-CoA acetyltransferase, mitochondrial	Acetoacetyl-CoA thiolase	THIL_MOUSE	Q8QZT1	Q3TE92	Acat1	na	Mus musculus (Mouse)	10090	Q8QZT1	MGI:87870	Acat1	MGI:87870			Acetylation; Acyltransferase; Metal-binding; Mitochondrion; Potassium; Transferase; Transit peptide
124	P19324	Serpin H1 OS=Mus musculus GN=Serpinh1 PE=1 SV=3 - [SERPH_MOUSE]	16	23	58	37	848472	1770988	739475	1262169	705103	2060473		1.23111e+06	853882	1.66065e+06	803989	1.28655e+06	749368	1.87631e+06	802413	1.60783e+06	2.00375	0.876111	0.00323856	0.00720519	FALSE	high	P19324	Serpin H1	47 kDa heat shock protein; Collagen-binding protein (Colligin); Serine protease inhibitor J6	SERPH_MOUSE	P19324	Q5U4D0	Serpinh1	Cbp1; Hsp47	Mus musculus (Mouse)	10090	P19324	MGI:88283	Serpinh1	MGI:88283			Acetylation; Chaperone; Endoplasmic reticulum; Glycoprotein; Signal; Stress response
125	Q8JZQ9	Eukaryotic translation initiation factor 3 subunit B OS=Mus musculus GN=Eif3b PE=1 SV=1 - [EIF3B_MOUSE]	29	41	78	45	1293563	1357817	1245576	1098095	1195209	1186376		1.22944e+06	1.30181e+06	1.27322e+06	1.35424e+06	1.1193e+06	1.27024e+06	1.08034e+06	1.30877e+06	1.15762e+06	-1.13057	-0.29079	0.321356	0.402872	FALSE	no	Q8JZQ9	Eukaryotic translation initiation factor 3 subunit B (eIF3b)	Eukaryotic translation initiation factor 3 subunit 9; eIF-3-eta; eIF3 p116	EIF3B_MOUSE	Q8JZQ9	Q922K2	Eif3b	Eif3s9	Mus musculus (Mouse)	10090	Q8JZQ9	MGI:106478	Eif3b	MGI:106478			Acetylation; Cytoplasm; Initiation factor; Phosphoprotein; Protein biosynthesis; Repeat; RNA-binding; WD repeat
126	Q9CQN1	Heat shock protein 75 kDa, mitochondrial OS=Mus musculus GN=Trap1 PE=1 SV=1 - [TRAP1_MOUSE]	26	33	71	35	831269	1728826	617869	1303461	578612	2260404		1.22007e+06	836570	1.62112e+06	671774	1.32863e+06	614936	2.05837e+06	707760	1.66937e+06	2.35867	1.11472	0.000218999	0.000639916	FALSE	high	Q9CQN1	Heat shock protein 75 kDa, mitochondrial (HSP 75)	TNFR-associated protein 1; Tumor necrosis factor type 1 receptor-associated protein (TRAP-1)	TRAP1_MOUSE	Q9CQN1	Q542I4	Trap1	Hsp75	Mus musculus (Mouse)	10090	Q9CQN1	MGI:1915265	Trap1	MGI:1915265			Acetylation; ATP-binding; Chaperone; Membrane; Mitochondrion; Mitochondrion inner membrane; Nucleotide-binding; Phosphoprotein; Transit peptide
127	O08709	Peroxiredoxin-6 OS=Mus musculus GN=Prdx6 PE=1 SV=3 - [PRDX6_MOUSE]	14	18	50	34	1743434	419824	1761646	950802	2029447	412108		1.21954e+06	1.75455e+06	393668	1.91534e+06	969165	2.15685e+06	375273	1.94225e+06	579369	-3.35235	-2.00629	2.93108e-10	6.02882e-09	FALSE	high	O08709	Peroxiredoxin-6	1-Cys peroxiredoxin (1-Cys PRX); Acidic calcium-independent phospholipase A2 (aiPLA2); Antioxidant protein 2; Non-selenium glutathione peroxidase (NSGPx)	PRDX6_MOUSE	O08709	Q91WT2; Q9QWP4; Q9QWW0	Prdx6	Aop2; Ltw4; Prdx5	Mus musculus (Mouse)	10090	O08709	MGI:894320	Prdx6	MGI:894320			Acetylation; Antioxidant; Cytoplasm; Cytoplasmic vesicle; Disulfide bond; Hydrolase; Lipid degradation; Lipid metabolism; Lysosome; Multifunctional enzyme; Oxidoreductase; Peroxidase; Phosphoprotein; Redox-active center
128	Q64521	Glycerol-3-phosphate dehydrogenase, mitochondrial OS=Mus musculus GN=Gpd2 PE=1 SV=2 - [GPDM_MOUSE]	34	40	86	58	547955	1841012	417435	1297358	442081	2734586		1.2134e+06	551449	1.72631e+06	453853	1.32241e+06	469834	2.49017e+06	491712	1.8463e+06	3.75483	1.75221	1.08953e-08	1.24568e-07	FALSE	high	Q64521	Glycerol-3-phosphate dehydrogenase, mitochondrial (GPD-M; GPDH-M)	Protein TISP38	GPDM_MOUSE	Q64521	Q3TK51; Q3UDY8; Q61507; Q8CBX6; Q8K4U5; Q8VDT0; Q9ERP0	Gpd2	Gdm1	Mus musculus (Mouse)	10090	Q64521	MGI:99778	Gpd2	MGI:99778			Calcium; FAD; Flavoprotein; Membrane; Metal-binding; Mitochondrion; Mitochondrion inner membrane; Oxidoreductase; Phosphoprotein; Repeat; Transit peptide
129	Q8VDN2	Sodium/potassium-transporting ATPase subunit alpha-1 OS=Mus musculus GN=Atp1a1 PE=1 SV=1 - [AT1A1_MOUSE]	19	47	100	36	796307	1151385	808068	3013277	821581	681942		1.21209e+06	801385	1.07965e+06	878567	3.07147e+06	873158	620989	851036	1.5907e+06	1.86914	0.456762	0.176193	0.24448	FALSE	no	Q8VDN2	Sodium/potassium-transporting ATPase subunit alpha-1 (Na(+)/K(+) ATPase alpha-1 subunit)	Sodium pump subunit alpha-1	AT1A1_MOUSE	Q8VDN2	Q91Z09	Atp1a1	na	Mus musculus (Mouse)	10090	Q8VDN2	MGI:88105	Atp1a1	MGI:88105			Acetylation; ATP-binding; Cell membrane; Hydrolase; Ion transport; Magnesium; Membrane; Metal-binding; Nucleotide-binding; Phosphoprotein; Potassium; Potassium transport; Sodium; Sodium transport; Sodium/potassium transport; Transmembrane; Transmembrane helix; Transport
130	Q9CZU6	Citrate synthase, mitochondrial OS=Mus musculus GN=Cs PE=1 SV=1 - [CISY_MOUSE]	16	17	87	51	456205	1732665	452686	1515307	477789	2594660		1.20489e+06	459114	1.62472e+06	492180	1.54457e+06	507784	2.36275e+06	486359	1.84401e+06	3.79146	1.78592	4.09998e-09	5.47882e-08	FALSE	high	Q9CZU6	Citrate synthase, mitochondrial	Citrate (Si)-synthase	CISY_MOUSE	Q9CZU6	Q3UDP3	Cs	na	Mus musculus (Mouse)	10090	Q9CZU6	MGI:88529	Cs	MGI:88529			Acetylation; Methylation; Mitochondrion; Transferase; Transit peptide; Tricarboxylic acid cycle
131	P97807	Fumarate hydratase, mitochondrial OS=Mus musculus GN=Fh PE=1 SV=3 - [FUMH_MOUSE]	23	26	67	39	731706	1479667	692368	1279379	723679	2309302		1.20268e+06	736372	1.38748e+06	752773	1.30409e+06	769110	2.10289e+06	752751	1.59815e+06	2.12308	0.940977	0.00162426	0.00389452	FALSE	high	P97807	Fumarate hydratase, mitochondrial (Fumarase)	EF-3	FUMH_MOUSE	P97807	Q3UIA9; Q99JL0; Q9DCX0	Fh	Fh1	Mus musculus (Mouse)	10090	P97807	MGI:95530	Fh1	MGI:95530			Acetylation; Alternative initiation; Cytoplasm; Lyase; Mitochondrion; Transit peptide; Tricarboxylic acid cycle
132	Q91VR2	ATP synthase subunit gamma, mitochondrial OS=Mus musculus GN=Atp5c1 PE=1 SV=1 - [ATPG_MOUSE]	12	17	39	26	485322	1970213	458480	1223551	390472	2673594		1200272	488417	1.84747e+06	498479	1.24718e+06	414985	2.43462e+06	467294	1.84309e+06	3.94418	1.81899	4.13754e-09	5.51146e-08	FALSE	high	Q91VR2	ATP synthase subunit gamma, mitochondrial	F-ATPase gamma subunit	ATPG_MOUSE	Q91VR2	na	Atp5c1	na	Mus musculus (Mouse)	10090	Q91VR2	MGI:1261437	Atp5c1	MGI:1261437			Acetylation; ATP synthesis; CF(1); Hydrogen ion transport; Ion transport; Membrane; Mitochondrion; Mitochondrion inner membrane; Transit peptide; Transport
133	Q9D0E1	Heterogeneous nuclear ribonucleoprotein M OS=Mus musculus GN=Hnrnpm PE=1 SV=3 - [HNRPM_MOUSE]	19	56	107	31	1134846	1416163	1087322	850464	1137328	1537961		1194014	1.14208e+06	1.32793e+06	1.18218e+06	866889	1.20873e+06	1.4005e+06	1.17766e+06	1.19844e+06	1.01764	-0.116004	0.694498	0.756324	FALSE	no	Q9D0E1	Heterogeneous nuclear ribonucleoprotein M (hnRNP M)	na	HNRPM_MOUSE	Q9D0E1	Q6P1B2; Q99JQ0	Hnrnpm	Hnrpm	Mus musculus (Mouse)	10090	Q9D0E1	MGI:1926465	Hnrnpm	MGI:1926465			Acetylation; Alternative splicing; mRNA processing; mRNA splicing; Nucleus; Phosphoprotein; Repeat; Ribonucleoprotein; RNA-binding; Spliceosome; Ubl conjugation
134	Q8VDM4	26S proteasome non-ATPase regulatory subunit 2 OS=Mus musculus GN=Psmd2 PE=1 SV=1 - [PSMD2_MOUSE]	34	43	96	51	1103667	1404172	1110223	1213695	1150914	1157339		1.19e+06	1.1107e+06	1.31669e+06	1.20708e+06	1.23714e+06	1.22317e+06	1.05389e+06	1.18032e+06	1.20257e+06	1.01886	-0.0885514	0.762696	0.816396	FALSE	no	Q8VDM4	26S proteasome non-ATPase regulatory subunit 2	26S proteasome regulatory subunit RPN1; 26S proteasome regulatory subunit S2; 26S proteasome subunit p97	PSMD2_MOUSE	Q8VDM4	na	Psmd2	na	Mus musculus (Mouse)	10090	Q8VDM4	MGI:1096584	Psmd2	MGI:1096584			Acetylation; Phosphoprotein; Proteasome; Repeat
135	P54071	Isocitrate dehydrogenase [NADP], mitochondrial OS=Mus musculus GN=Idh2 PE=1 SV=3 - [IDHP_MOUSE]	19	27	65	45	517081	1740191	429726	1330526	502163	2617697		1189564	520378	1.63177e+06	467217	1.35622e+06	533688	2.38372e+06	507094	1.79057e+06	3.53105	1.67031	3.65213e-08	3.42061e-07	FALSE	high	P54071	Isocitrate dehydrogenase [NADP], mitochondrial (IDH)	ICD-M; IDP; NADP(+)-specific ICDH; Oxalosuccinate decarboxylase	IDHP_MOUSE	P54071	Q8C2R9; Q9EQK1	Idh2	na	Mus musculus (Mouse)	10090	P54071	MGI:96414	Idh2	MGI:96414			Acetylation; Glyoxylate bypass; Magnesium; Manganese; Metal-binding; Mitochondrion; NADP; Oxidoreductase; Stress response; Transit peptide; Tricarboxylic acid cycle
136	Q8BMJ2	Leucine--tRNA ligase, cytoplasmic OS=Mus musculus GN=Lars PE=1 SV=2 - [SYLC_MOUSE]	40	68	121	61	1315326	1811498	933982	1130386	1072491	842496		1.18436e+06	1.32371e+06	1.69864e+06	1.01547e+06	1.15222e+06	1.13982e+06	767193	1.15967e+06	1.20602e+06	1.03997	-0.119099	0.687937	0.750933	FALSE	no	Q8BMJ2	Leucine--tRNA ligase, cytoplasmic	Leucyl-tRNA synthetase (LeuRS)	SYLC_MOUSE	Q8BMJ2	Q8BKW9	Lars	na	Mus musculus (Mouse)	10090	Q8BMJ2	MGI:1913808	Lars	MGI:1913808			Acetylation; Aminoacyl-tRNA synthetase; ATP-binding; Cytoplasm; Ligase; Nucleotide-binding; Protein biosynthesis
137	P26041	Moesin OS=Mus musculus GN=Msn PE=1 SV=3 - [MOES_MOUSE]	24	53	134	38	1538642	495597	1485747	1571996	1660297	349557		1.18364e+06	1.54845e+06	464720	1.61537e+06	1.60236e+06	1.76453e+06	318313	1.64278e+06	795130	-2.06606	-1.54272	3.8419e-05	0.000136154	FALSE	high	P26041	Moesin	Membrane-organizing extension spike protein	MOES_MOUSE	P26041	B1AX70; Q3UL28; Q8BSN4	Msn	na	Mus musculus (Mouse)	10090	P26041	MGI:97167	Msn	MGI:97167			Acetylation; Cell membrane; Cell projection; Cytoplasm; Cytoskeleton; Membrane; Phosphoprotein
138	P43276	Histone H1.5 OS=Mus musculus GN=Hist1h1b PE=1 SV=2 - [H15_MOUSE]	6	15	30	12	1350788	939956	1208100	818212	1441321	1336229		1.18243e+06	1.3594e+06	881395	1.3135e+06	834014	1.5318e+06	1.2168e+06	1.40157e+06	977401	-1.43397	-0.648268	0.0281604	0.0490091	FALSE	med	P43276	Histone H1.5	H1 VAR.5; H1b	H15_MOUSE	P43276	Q9CRM8	Hist1h1b	H1f5	Mus musculus (Mouse)	10090	P43276	MGI:1861461	Hist1h1b	MGI:1861461			Acetylation; Chromosome; Citrullination; DNA-binding; Methylation; Nucleus; Phosphoprotein
139	Q9DCN2	NADH-cytochrome b5 reductase 3 OS=Mus musculus GN=Cyb5r3 PE=1 SV=3 - [NB5R3_MOUSE]	15	19	56	35	568226	1813570	487184	1298952	514942	2394767		1.17961e+06	571849	1.70058e+06	529688	1.32404e+06	547269	2.18072e+06	549602	1.73511e+06	3.15704	1.51811	4.92671e-07	3.03561e-06	FALSE	high	Q9DCN2	NADH-cytochrome b5 reductase 3 soluble form	Diaphorase-1	NB5R3_MOUSE	Q9DCN2	na	Cyb5r3	Dia1	Mus musculus (Mouse)	10090	Q9DCN2	MGI:94893	Cyb5r3	MGI:94893			Acetylation; Alternative promoter usage; Cholesterol biosynthesis; Cholesterol metabolism; Cytoplasm; Endoplasmic reticulum; FAD; Flavoprotein; Lipid biosynthesis; Lipid metabolism; Lipoprotein; Membrane; Mitochondrion; Mitochondrion outer membrane; Myristate; NAD; Oxidoreductase; Phosphoprotein; Steroid biosynthesis; Steroid metabolism; Sterol biosynthesis; Sterol metabolism
140	P03975	IgE-binding protein OS=Mus musculus GN=Iap PE=2 SV=1 - [IGEB_MOUSE]	15	24	52	31	576808	1443648	697756	1108652	646964	2596817		1.17844e+06	580486	1.35371e+06	758631	1.13006e+06	687579	2.36471e+06	675565	1.61616e+06	2.39231	1.08085	0.000370075	0.00102362	FALSE	high	P03975	IgE-binding protein	na	IGEB_MOUSE	P03975	na	Iap	na	Mus musculus (Mouse)	10090	P03975	MGI:96306	Iap	MGI:96306			Hybridoma; IgE-binding protein
141	P63242	Eukaryotic translation initiation factor 5A-1 OS=Mus musculus GN=Eif5a PE=1 SV=2 - [IF5A1_MOUSE]	9	10	29	22	1923879	797507	1560599	914304	1365426	507045		1.17813e+06	1.93615e+06	747821	1.69675e+06	931962	1.45114e+06	461725	1.69468e+06	713836	-2.37405	-1.40801	3.14896e-06	1.51352e-05	FALSE	high	P63242	Eukaryotic translation initiation factor 5A-1 (eIF-5A-1; eIF-5A1)	Eukaryotic initiation factor 5A isoform 1 (eIF-5A); eIF-4D	IF5A1_MOUSE	P63242	P10159; Q16182; Q5NCX0; Q78NR3; Q9D0G2	Eif5a	na	Mus musculus (Mouse)	10090	P63242	MGI:106248	Eif5a	MGI:106248			Acetylation; Cytoplasm; Elongation factor; Endoplasmic reticulum; Hypusine; Membrane; mRNA transport; Nuclear pore complex; Nucleus; Protein biosynthesis; Protein transport; RNA-binding; Translocation; Transport
142	Q9CR16	Peptidyl-prolyl cis-trans isomerase D OS=Mus musculus GN=Ppid PE=1 SV=3 - [PPID_MOUSE]	14	21	54	33	1808317	599612	1734326	919824	1654986	346302		1.17723e+06	1.81985e+06	562255	1.88563e+06	937589	1.75888e+06	315349	1.82145e+06	605064	-3.01035	-1.83982	4.05826e-09	5.45757e-08	FALSE	high	Q9CR16	Peptidyl-prolyl cis-trans isomerase D (PPIase D)	40 kDa peptidyl-prolyl cis-trans isomerase; Cyclophilin-40 (CYP-40); Rotamase D	PPID_MOUSE	Q9CR16	Q543G1	Ppid	na	Mus musculus (Mouse)	10090	Q9CR16	MGI:1914988	Ppid	MGI:1914988			Acetylation; Apoptosis; Chaperone; Cyclosporin; Cytoplasm; Isomerase; Nucleus; Phosphoprotein; Protein transport; Repeat; Rotamase; TPR repeat; Transport
143	Q99020	Heterogeneous nuclear ribonucleoprotein A/B OS=Mus musculus GN=Hnrnpab PE=1 SV=1 - [ROAA_MOUSE]	10	15	34	26	1673995	838419	1512354	470453	1814671	679246		1.16486e+06	1.68467e+06	786184	1.6443e+06	479539	1.92859e+06	618534	1.75252e+06	628086	-2.79026	-1.61673	8.24564e-08	6.79739e-07	FALSE	high	Q99020	Heterogeneous nuclear ribonucleoprotein A/B (hnRNP A/B)	CArG-binding factor-A (CBF-A)	ROAA_MOUSE	Q99020	Q8BPE0	Hnrnpab	Cbf-a; Cgbfa; Hnrpab	Mus musculus (Mouse)	10090	Q99020	MGI:1330294	Hnrnpab	MGI:1330294			Acetylation; Cytoplasm; DNA-binding; Methylation; Nucleus; Phosphoprotein; Repeat; Repressor; RNA-binding; Transcription; Transcription regulation
144	Q9DB20	ATP synthase subunit O, mitochondrial OS=Mus musculus GN=Atp5o PE=1 SV=1 - [ATPO_MOUSE]	9	14	35	20	658940	1870916	543519	1079701	573375	2250446		1.16282e+06	663142	1.75435e+06	590937	1.10055e+06	609370	2.0493e+06	621150	1.63474e+06	2.63179	1.23903	3.79058e-05	0.000134562	FALSE	high	Q9DB20	ATP synthase subunit O, mitochondrial	Oligomycin sensitivity conferral protein (OSCP)	ATPO_MOUSE	Q9DB20	na	Atp5o	D12Wsu28e	Mus musculus (Mouse)	10090	Q9DB20	MGI:106341	Atp5o	MGI:106341			Acetylation; ATP synthesis; Hydrogen ion transport; Ion transport; Membrane; Mitochondrion; Mitochondrion inner membrane; Transit peptide; Transport
145	Q6P4T2	U5 small nuclear ribonucleoprotein 200 kDa helicase OS=Mus musculus GN=Snrnp200 PE=1 SV=1 - [U520_MOUSE]	46	74	108	50	1648071	803737	1555250	794030	1301306	866522		1161486	1.65858e+06	753663	1.69094e+06	809365	1.383e+06	789071	1.5775e+06	784033	-2.01204	-1.11412	0.000182718	0.000541828	FALSE	high	Q6P4T2	U5 small nuclear ribonucleoprotein 200 kDa helicase	BRR2 homolog; U5 snRNP-specific 200 kDa protein (U5-200KD)	U520_MOUSE	Q6P4T2	Q69ZZ3	Snrnp200	Kiaa0788	Mus musculus (Mouse)	10090	Q6P4T2	MGI:2444401	Snrnp200	MGI:2444401			Acetylation; ATP-binding; Coiled coil; Helicase; Hydrolase; Isopeptide bond; mRNA processing; mRNA splicing; Nucleotide-binding; Nucleus; Phosphoprotein; Repeat; Ribonucleoprotein; Spliceosome; Ubl conjugation
146	Q8BG32	26S proteasome non-ATPase regulatory subunit 11 OS=Mus musculus GN=Psmd11 PE=1 SV=3 - [PSD11_MOUSE]	18	22	42	29	1186489	1306159	1101136	1180278	1045540	1141109		1.16012e+06	1.19405e+06	1.22478e+06	1.1972e+06	1.20307e+06	1.11118e+06	1.03912e+06	1.16748e+06	1.15566e+06	-1.01023	-0.128284	0.661381	0.728451	FALSE	no	Q8BG32	26S proteasome non-ATPase regulatory subunit 11	26S proteasome regulatory subunit RPN6; 26S proteasome regulatory subunit S9; 26S proteasome regulatory subunit p44.5	PSD11_MOUSE	Q8BG32	na	Psmd11	na	Mus musculus (Mouse)	10090	Q8BG32	MGI:1916327	Psmd11	MGI:1916327			Acetylation; Phosphoprotein; Proteasome
147	P62849	40S ribosomal protein S24 OS=Mus musculus GN=Rps24 PE=2 SV=1 - [RS24_MOUSE]	6	9	28	20	1665223	868250	1427205	1033691	1287365	649823		1.15526e+06	1.67584e+06	814156	1.55172e+06	1.05365e+06	1.36818e+06	591741	1.53191e+06	819851	-1.86853	-1.04778	0.000453537	0.00123574	FALSE	high	P62849	40S ribosomal protein S24	na	RS24_MOUSE	P62849	P16632; Q642L0; Q6PDB5	Rps24	na	Mus musculus (Mouse)	10090	P62849	MGI:98147	Rps24	MGI:98147			Acetylation; Alternative splicing; Phosphoprotein; Ribonucleoprotein; Ribosomal protein
148	P53026	60S ribosomal protein L10a OS=Mus musculus GN=Rpl10a PE=1 SV=3 - [RL10A_MOUSE]	11	14	46	28	1276579	1066312	1257655	984852	1363852	950813		1.15001e+06	1.28472e+06	999879	1.36738e+06	1.00387e+06	1.44947e+06	865828	1.36719e+06	956526	-1.42933	-0.627527	0.0329953	0.0564404	FALSE	low	P53026	60S ribosomal protein L10a	CSA-19; Neural precursor cell expressed developmentally down-regulated protein 6 (NEDD-6)	RL10A_MOUSE	P53026	na	Rpl10a	Nedd-6; Nedd6	Mus musculus (Mouse)	10090	P53026	MGI:1343877	Rpl10a	MGI:1343877			Acetylation; Phosphoprotein; Ribonucleoprotein; Ribosomal protein
149	Q9CR57	60S ribosomal protein L14 OS=Mus musculus GN=Rpl14 PE=1 SV=3 - [RL14_MOUSE]	5	12	30	18	1371973	1072893	1345715	1006262	1285190	786642		1.14478e+06	1.38072e+06	1.00605e+06	1.46312e+06	1.0257e+06	1.36587e+06	716331	1.40324e+06	916026	-1.53188	-0.743938	0.011736	0.0224758	FALSE	med	Q9CR57	60S ribosomal protein L14	na	RL14_MOUSE	Q9CR57	Q9D8Q1	Rpl14	na	Mus musculus (Mouse)	10090	Q9CR57	MGI:1914365	Rpl14	MGI:1914365			Acetylation; Phosphoprotein; Repeat; Ribonucleoprotein; Ribosomal protein
150	Q8QZY1	Eukaryotic translation initiation factor 3 subunit L OS=Mus musculus GN=Eif3l PE=1 SV=1 - [EIF3L_MOUSE]	23	28	59	41	1265387	803631	1231839	1453272	1128727	947707		1.13843e+06	1.27346e+06	753563	1.33931e+06	1.48134e+06	1.19959e+06	863000	1.27078e+06	1.03263e+06	-1.23062	-0.473324	0.113812	0.166454	FALSE	no	Q8QZY1	Eukaryotic translation initiation factor 3 subunit L (eIF3l)	66 kDa tyrosine-rich heat shock protein; 67 kDa polymerase-associated factor; Eukaryotic translation initiation factor 3 subunit 6-interacting protein; Eukaryotic translation initiation factor 3 subunit E-interacting protein; HSP-66Y; PAF67	EIF3L_MOUSE	Q8QZY1	Q3THF8; Q3TJ04; Q91YE4	Eif3l	Eif3eip; Eif3s6ip; Paf67	Mus musculus (Mouse)	10090	Q8QZY1	MGI:2386251	Eif3l	MGI:2386251			Acetylation; Cytoplasm; Initiation factor; Protein biosynthesis
151	P62259	14-3-3 protein epsilon OS=Mus musculus GN=Ywhae PE=1 SV=1 - [1433E_MOUSE]	14	23	63	31	1685853	519109	1531278	929918	1716716	387218		1.12835e+06	1.6966e+06	486768	1.66487e+06	947877	1.82449e+06	352608	1.72865e+06	595751	-2.90164	-1.77839	1.60075e-08	1.73112e-07	FALSE	high	P62259	14-3-3 protein epsilon (14-3-3E)	na	1433E_MOUSE	P62259	P29360; P42655; Q63631	Ywhae	na	Mus musculus (Mouse)	10090	P62259	MGI:894689	Ywhae	MGI:894689			Acetylation; Cytoplasm; Phosphoprotein
152	P48962	ADP/ATP translocase 1 OS=Mus musculus GN=Slc25a4 PE=1 SV=4 - [ADT1_MOUSE]	10	21	89	28	447693	1864192	446395	1110473	432920	2465307		1127830	450548	1.74805e+06	485340	1.13192e+06	460098	2.24495e+06	465329	1.70831e+06	3.67119	1.71098	2.30984e-08	2.31643e-07	FALSE	high	P48962	ADP/ATP translocase 1	ADP,ATP carrier protein 1; ADP,ATP carrier protein, heart/skeletal muscle isoform T1; Adenine nucleotide translocator 1 (ANT 1); Solute carrier family 25 member 4; mANC1	ADT1_MOUSE	P48962	Q62164	Slc25a4	Anc1; Ant1	Mus musculus (Mouse)	10090	P48962	MGI:1353495	Slc25a4	MGI:1353495			Acetylation; Isopeptide bond; Membrane; Mitochondrion; Mitochondrion inner membrane; Repeat; S-nitrosylation; Transmembrane; Transmembrane helix; Transport; Ubl conjugation
153	Q9WU78	Programmed cell death 6-interacting protein OS=Mus musculus GN=Pdcd6ip PE=1 SV=3 - [PDC6I_MOUSE]	34	46	81	44	1334839	936203	1221080	1275221	1210540	770953		1124806	1.34335e+06	877876	1.32761e+06	1.29985e+06	1.28654e+06	702044	1.31917e+06	959923	-1.37424	-0.618063	0.0381396	0.0640647	FALSE	low	Q9WU78	Programmed cell death 6-interacting protein	ALG-2-interacting protein 1; ALG-2-interacting protein X; E2F1-inducible protein; Eig2	PDC6I_MOUSE	Q9WU78	O88695; O89014; Q3TED2; Q8BSL8; Q8R0H5; Q99LR3; Q9QZN8	Pdcd6ip	Aip1; Alix	Mus musculus (Mouse)	10090	Q9WU78	MGI:1333753	Pdcd6ip	MGI:1333753			Acetylation; Alternative splicing; Apoptosis; Cell cycle; Cell division; Cytoplasm; Cytoskeleton; Phosphoprotein; Protein transport; Transport
154	P51881	ADP/ATP translocase 2 OS=Mus musculus GN=Slc25a5 PE=1 SV=3 - [ADT2_MOUSE]	7	18	84	22	438617	1847832	424499	1080487	440071	2515520		1.1245e+06	441414	1.73271e+06	461534	1.10135e+06	467698	2.29068e+06	456882	1.70825e+06	3.73893	1.7294	1.60687e-08	1.73327e-07	FALSE	high	P51881	ADP/ATP translocase 2, N-terminally processed	ADP,ATP carrier protein 2; Adenine nucleotide translocator 2 (ANT 2); Solute carrier family 25 member 5	ADT2_MOUSE	P51881	Q61311	Slc25a5	Ant2	Mus musculus (Mouse)	10090	P51881	MGI:1353496	Slc25a5	MGI:1353496			Acetylation; Chromosome partition; Membrane; Methylation; Mitochondrion; Mitochondrion inner membrane; Repeat; Transmembrane; Transmembrane helix; Transport
155	Q9D6R2	Isocitrate dehydrogenase [NAD] subunit alpha, mitochondrial OS=Mus musculus GN=Idh3a PE=1 SV=1 - [IDH3A_MOUSE]	12	19	57	34	555430	1653355	449743	1242354	387751	2436978		1.12094e+06	558972	1.55035e+06	488980	1.26635e+06	412093	2.21916e+06	486682	1.67862e+06	3.44911	1.64321	9.34417e-08	7.55456e-07	FALSE	high	Q9D6R2	Isocitrate dehydrogenase [NAD] subunit alpha, mitochondrial	Isocitric dehydrogenase subunit alpha; NAD(+)-specific ICDH subunit alpha	IDH3A_MOUSE	Q9D6R2	Q3UAM8; Q8C8A1; Q9D1L1	Idh3a	na	Mus musculus (Mouse)	10090	Q9D6R2	MGI:1915084	Idh3a	MGI:1915084			Acetylation; Alternative splicing; Magnesium; Manganese; Metal-binding; Mitochondrion; NAD; Oxidoreductase; Transit peptide; Tricarboxylic acid cycle
157	P62751	60S ribosomal protein L23a OS=Mus musculus GN=Rpl23a PE=1 SV=1 - [RL23A_MOUSE]	9	11	41	29	1619297	644893	1519727	700104	1408352	661675		1.09234e+06	1.62962e+06	604715	1.65231e+06	713625	1.49677e+06	602534	1.5929e+06	640291	-2.48777	-1.42856	1.80921e-06	9.29184e-06	FALSE	high	P62751	60S ribosomal protein L23a	na	RL23A_MOUSE	P62751	P29316; P39024; Q92774	Rpl23a	na	Mus musculus (Mouse)	10090	P62751	MGI:3040672	Rpl23a	MGI:3040672			Citrullination; Methylation; Phosphoprotein; Ribonucleoprotein; Ribosomal protein; RNA-binding; rRNA-binding
158	O35286	Putative pre-mRNA-splicing factor ATP-dependent RNA helicase DHX15 OS=Mus musculus GN=Dhx15 PE=1 SV=2 - [DHX15_MOUSE]	26	39	63	36	1349310	960267	1247794	838675	1195976	958427		1.09174e+06	1.35791e+06	900441	1.35666e+06	854872	1.27106e+06	872762	1.32854e+06	876025	-1.51656	-0.71106	0.0156971	0.0291439	FALSE	med	O35286	Putative pre-mRNA-splicing factor ATP-dependent RNA helicase DHX15	DEAH box protein 15	DHX15_MOUSE	O35286	Q99L91	Dhx15	Ddx15; Deah9	Mus musculus (Mouse)	10090	O35286	MGI:1099786	Dhx15	MGI:1099786			Acetylation; ATP-binding; Helicase; Hydrolase; mRNA processing; mRNA splicing; Nucleotide-binding; Nucleus
159	Q8VEM8	Phosphate carrier protein, mitochondrial OS=Mus musculus GN=Slc25a3 PE=1 SV=1 - [MPCP_MOUSE]	16	20	66	38	562208	1581988	519322	1027347	510951	2337278		1089849	565793	1.48343e+06	564629	1.04719e+06	543027	2.12837e+06	557817	1.55299e+06	2.78406	1.30509	1.6918e-05	6.54872e-05	FALSE	high	Q8VEM8	Phosphate carrier protein, mitochondrial	Phosphate transport protein (PTP); Solute carrier family 25 member 3	MPCP_MOUSE	Q8VEM8	Q542V7	Slc25a3	na	Mus musculus (Mouse)	10090	Q8VEM8	MGI:1353498	Slc25a3	MGI:1353498			Acetylation; Membrane; Mitochondrion; Mitochondrion inner membrane; Phosphoprotein; Repeat; Symport; Transit peptide; Transmembrane; Transmembrane helix; Transport
160	P61222	ATP-binding cassette sub-family E member 1 OS=Mus musculus GN=Abce1 PE=2 SV=1 - [ABCE1_MOUSE]	19	28	51	30	1092850	1708643	988676	891443	984245	837050		1.08382e+06	1.09982e+06	1.60219e+06	1.07493e+06	908659	1.04603e+06	762233	1.07359e+06	1.09103e+06	1.01624	-0.163572	0.580737	0.657698	FALSE	no	P61222	ATP-binding cassette sub-family E member 1	RNase L inhibitor; Ribonuclease 4 inhibitor (RNS4I)	ABCE1_MOUSE	P61222	O88793; Q13181; Q13864; Q96AL0; Q96B10; Q99K66	Abce1	Rli	Mus musculus (Mouse)	10090	P61222	MGI:1195458	Abce1	MGI:1195458			ATP-binding; Chaperone; Cytoplasm; Mitochondrion; Nucleotide-binding; Repeat
161	O08749	Dihydrolipoyl dehydrogenase, mitochondrial OS=Mus musculus GN=Dld PE=1 SV=2 - [DLDH_MOUSE]	16	24	72	34	443040	1700167	354342	1242137	422071	2310043		1.07863e+06	445865	1.59424e+06	385256	1.26613e+06	448568	2.10357e+06	426563	1.65465e+06	3.87902	1.81694	2.1088e-09	3.12668e-08	FALSE	high	O08749	Dihydrolipoyl dehydrogenase, mitochondrial	Dihydrolipoamide dehydrogenase	DLDH_MOUSE	O08749	Q3TG55; Q3U5W5; Q3UWP7; Q99LD3	Dld	na	Mus musculus (Mouse)	10090	O08749	MGI:107450	Dld	MGI:107450			Acetylation; Disulfide bond; FAD; Flavoprotein; Mitochondrion; NAD; Oxidoreductase; Phosphoprotein; Redox-active center; Transit peptide
162	Q8K411	Presequence protease, mitochondrial OS=Mus musculus GN=Pitrm1 PE=1 SV=1 - [PREP_MOUSE]	37	48	86	45	511248	1497616	432416	1324556	405649	2294735		1.0777e+06	514508	1.40431e+06	470141	1.35014e+06	431115	2.08963e+06	471921	1.61469e+06	3.42153	1.63681	8.1613e-08	6.74111e-07	FALSE	high	Q8K411	Presequence protease, mitochondrial	Pitrilysin metalloproteinase 1	PREP_MOUSE	Q8K411	Q3THC4; Q3TJI1; Q3TPP0; Q3URQ8; Q4KUG2; Q4KUG3; Q6ZPX6; Q922N1; Q9CV63	Pitrm1	Kiaa1104; Ntup1	Mus musculus (Mouse)	10090	Q8K411	MGI:1916867	Pitrm1	MGI:1916867			Acetylation; Alternative splicing; Disulfide bond; Hydrolase; Metal-binding; Metalloprotease; Mitochondrion; Protease; Transit peptide; Zinc
163	O88685	26S protease regulatory subunit 6A OS=Mus musculus GN=Psmc3 PE=1 SV=2 - [PRS6A_MOUSE]	19	25	55	36	954571	1335524	1009375	1186184	1117859	858162		1.07695e+06	960658	1.25232e+06	1.09744e+06	1.20909e+06	1.18804e+06	781458	1.08204e+06	1.08096e+06	-1.00101	-0.136665	0.644845	0.714867	FALSE	no	O88685	26S protease regulatory subunit 6A	26S proteasome AAA-ATPase subunit RPT5; Proteasome 26S subunit ATPase 3; Tat-binding protein 1 (TBP-1)	PRS6A_MOUSE	O88685	Q99JN8	Psmc3	Tbp1	Mus musculus (Mouse)	10090	O88685	MGI:1098754	Psmc3	MGI:1098754			ATP-binding; Cytoplasm; Nucleotide-binding; Nucleus; Phosphoprotein; Proteasome
164	Q9CQQ7	ATP synthase F(0) complex subunit B1, mitochondrial OS=Mus musculus GN=Atp5f1 PE=1 SV=1 - [AT5F1_MOUSE]	15	24	50	33	339203	1700380	345897	1115876	447823	2509047		1076371	341366	1.59444e+06	376074	1.13743e+06	475936	2.28479e+06	397792	1.67222e+06	4.20375	1.91759	3.10439e-10	6.35415e-09	FALSE	high	Q9CQQ7	ATP synthase F(0) complex subunit B1, mitochondrial	ATP synthase subunit b (ATPase subunit b)	AT5F1_MOUSE	Q9CQQ7	na	Atp5f1	na	Mus musculus (Mouse)	10090	Q9CQQ7	MGI:1100495	Atp5f1	MGI:1100495			Acetylation; CF(0); Hydrogen ion transport; Ion transport; Membrane; Mitochondrion; Mitochondrion inner membrane; Transit peptide; Transport
165	P24547	Inosine-5'-monophosphate dehydrogenase 2 OS=Mus musculus GN=Impdh2 PE=1 SV=2 - [IMDH2_MOUSE]	21	33	81	35	1258592	1181431	1262425	969583	1211031	574068		1.07619e+06	1.26662e+06	1.10783e+06	1.37256e+06	988309	1.28706e+06	522757	1.30875e+06	872964	-1.4992	-0.764413	0.0106347	0.0205832	FALSE	med	P24547	Inosine-5'-monophosphate dehydrogenase 2 (IMP dehydrogenase 2; IMPD 2; IMPDH 2)	IMPDH-II	IMDH2_MOUSE	P24547	Q61734; Q91Z11	Impdh2	na	Mus musculus (Mouse)	10090	P24547	MGI:109367	Impdh2	MGI:109367			Acetylation; CBS domain; Cytoplasm; DNA-binding; GMP biosynthesis; Metal-binding; NAD; Nucleus; Oxidoreductase; Phosphoprotein; Potassium; Purine biosynthesis; Repeat; RNA-binding
166	P17918	Proliferating cell nuclear antigen OS=Mus musculus GN=Pcna PE=1 SV=2 - [PCNA_MOUSE]	12	21	55	29	1776785	452953	1591447	678792	1594041	330974		1070832	1.78811e+06	424733	1.73029e+06	691901	1.69411e+06	301391	1.73751e+06	472675	-3.6759	-2.07588	2.69958e-11	7.45226e-10	FALSE	high	P17918	Proliferating cell nuclear antigen (PCNA)	Cyclin	PCNA_MOUSE	P17918	na	Pcna	na	Mus musculus (Mouse)	10090	P17918	MGI:97503	Pcna	MGI:97503			Acetylation; DNA damage; DNA repair; DNA replication; DNA-binding; Isopeptide bond; Nucleus; Phosphoprotein; Ubl conjugation
167	P17751	Triosephosphate isomerase OS=Mus musculus GN=Tpi1 PE=1 SV=4 - [TPIS_MOUSE]	11	15	37	24	1729637	430269	1532265	764928	1680991	277570		1.06928e+06	1.74067e+06	403462	1.66595e+06	779701	1.78652e+06	252760	1.73104e+06	478641	-3.61658	-2.12553	3.5196e-11	9.52788e-10	FALSE	high	P17751	Triosephosphate isomerase (TIM)	Triose-phosphate isomerase	TPIS_MOUSE	P17751	Q3TJH2; Q3UC04; Q3UKG9; Q64513; Q9CVF9; Q9CWE7	Tpi1	Tpi	Mus musculus (Mouse)	10090	P17751	MGI:98797	Tpi1	MGI:98797			Acetylation; Gluconeogenesis; Glycolysis; Isomerase; Nitration; Pentose shunt; Phosphoprotein
168	P63158	High mobility group protein B1 OS=Mus musculus GN=Hmgb1 PE=1 SV=2 - [HMGB1_MOUSE]	14	17	45	27	1946860	379940	1678264	374176	1627557	392761		1066593	1.95927e+06	356269	1.82468e+06	381402	1.72973e+06	357656	1.8379e+06	365109	-5.03383	-2.44093	3.04272e-15	2.45524e-13	FALSE	high	P63158	High mobility group protein B1	High mobility group protein 1 (HMG-1)	HMGB1_MOUSE	P63158	P07155; P27109; P27428	Hmgb1	Hmg-1; Hmg1	Mus musculus (Mouse)	10090	P63158	MGI:96113	Hmgb1	MGI:96113			Acetylation; Chromosome; Cytoplasm; DNA-binding; Heparin-binding; Isopeptide bond; Nucleus; Phosphoprotein; Repeat; Ubl conjugation
169	Q91V92	ATP-citrate synthase OS=Mus musculus GN=Acly PE=1 SV=1 - [ACLY_MOUSE]	29	50	80	45	1237469	693967	1179669	1275598	1266596	705733		1.05984e+06	1.24536e+06	650732	1.28259e+06	1.30023e+06	1.34611e+06	642654	1.29135e+06	864540	-1.49369	-0.775627	0.0103454	0.0200969	FALSE	med	Q91V92	ATP-citrate synthase	ATP-citrate (pro-S-)-lyase; Citrate cleavage enzyme	ACLY_MOUSE	Q91V92	na	Acly	na	Mus musculus (Mouse)	10090	Q91V92	MGI:103251	Acly	MGI:103251			Acetylation; ATP-binding; Cytoplasm; Isopeptide bond; Lipid biosynthesis; Lipid metabolism; Magnesium; Metal-binding; Nucleotide-binding; Phosphoprotein; Transferase; Ubl conjugation
170	O54734	Dolichyl-diphosphooligosaccharide--protein glycosyltransferase 48 kDa subunit OS=Mus musculus GN=Ddost PE=1 SV=2 - [OST48_MOUSE]	13	19	43	21	470210	1814824	381504	1189804	401797	2088259		1057733	473208	1.70176e+06	414788	1.21278e+06	427021	1.90161e+06	438339	1.60538e+06	3.66242	1.73865	9.22596e-09	1.08437e-07	FALSE	high	O54734	Dolichyl-diphosphooligosaccharide--protein glycosyltransferase 48 kDa subunit (DDOST 48 kDa subunit; Oligosaccharyl transferase 48 kDa subunit)	na	OST48_MOUSE	O54734	Q8C4P7	Ddost	na	Mus musculus (Mouse)	10090	O54734	MGI:1194508	Ddost	MGI:1194508			Endoplasmic reticulum; Glycosyltransferase; Membrane; Signal; Transferase; Transmembrane; Transmembrane helix
171	Q8CGK3	Lon protease homolog, mitochondrial OS=Mus musculus GN=Lonp1 PE=1 SV=2 - [LONM_MOUSE]	31	49	97	49	495533	1635418	348012	1210520	390124	2183972		1.04393e+06	498693	1.53353e+06	378374	1.2339e+06	414615	1.98877e+06	430561	1.5854e+06	3.68217	1.75133	8.48234e-09	1.01401e-07	FALSE	high	Q8CGK3	Lon protease homolog, mitochondrial	Lon protease-like protein (LONP); Mitochondrial ATP-dependent protease Lon; Serine protease 15	LONM_MOUSE	Q8CGK3	Q3TSK9; Q3TVL2; Q3TXE4; Q3TZW3; Q9DBP9	Lonp1	Prss15	Mus musculus (Mouse)	10090	Q8CGK3	MGI:1921392	Lonp1	MGI:1921392			ATP-binding; DNA-binding; Hydrolase; Mitochondrion; Nucleotide-binding; Protease; Serine protease; Transit peptide
172	O70133	ATP-dependent RNA helicase A OS=Mus musculus GN=Dhx9 PE=1 SV=2 - [DHX9_MOUSE]	33	58	115	47	1172516	1099177	1134193	652266	1149479	1048024		1.04261e+06	1.17999e+06	1.0307e+06	1.23314e+06	664863	1.22164e+06	954350	1.21159e+06	883303	-1.37166	-0.591016	0.0453735	0.0746909	FALSE	low	O70133	ATP-dependent RNA helicase A (RHA)	DEAH box protein 9 (mHEL-5); Nuclear DNA helicase II (NDH II)	DHX9_MOUSE	O70133	O35931; O54703; Q5FWY1; Q6R5F7; Q9CSA2	Dhx9	Ddx9	Mus musculus (Mouse)	10090	O70133	MGI:108177	Dhx9	MGI:108177			3D-structure; Acetylation; Activator; Alternative splicing; ATP-binding; Biological rhythms; Cytoplasm; DNA-binding; Helicase; Hydrolase; Methylation; Nucleotide-binding; Nucleus; Phosphoprotein; Repeat; RNA-binding
173	Q8BMF4	Dihydrolipoyllysine-residue acetyltransferase component of pyruvate dehydrogenase complex, mitochondrial OS=Mus musculus GN=Dlat PE=1 SV=2 - [ODP2_MOUSE]	14	23	49	31	440145	1730049	340957	1008796	415701	2313855		1.04158e+06	442952	1.62226e+06	370703	1.02828e+06	441798	2.10704e+06	418484	1.58586e+06	3.78954	1.75481	7.72722e-09	9.42541e-08	FALSE	high	Q8BMF4	Dihydrolipoyllysine-residue acetyltransferase component of pyruvate dehydrogenase complex, mitochondrial	Dihydrolipoamide acetyltransferase component of pyruvate dehydrogenase complex; Pyruvate dehydrogenase complex component E2 (PDC-E2; PDCE2)	ODP2_MOUSE	Q8BMF4	Q8K2G8; Q8R339; Q91ZB1	Dlat	na	Mus musculus (Mouse)	10090	Q8BMF4	MGI:2385311	Dlat	MGI:2385311			Acetylation; Acyltransferase; Carbohydrate metabolism; Glucose metabolism; Lipoyl; Mitochondrion; Repeat; Transferase; Transit peptide; Tricarboxylic acid cycle
174	Q62261	Spectrin beta chain, non-erythrocytic 1 OS=Mus musculus GN=Sptbn1 PE=1 SV=2 - [SPTB2_MOUSE]	63	126	176	64	1174489	775324	1067123	1412367	1147332	649218		1.03764e+06	1.18198e+06	727020	1.16022e+06	1.43964e+06	1.21936e+06	591190	1.18719e+06	919285	-1.29142	-0.594416	0.0509814	0.0826577	FALSE	low	Q62261	Spectrin beta chain, non-erythrocytic 1	Beta-II spectrin; Embryonic liver fodrin; Fodrin beta chain	SPTB2_MOUSE	Q62261	A2AFU1; Q3TEM7; Q5SQL8; Q5SQL9; Q9QWJ7	Sptbn1	Elf; Spnb-2; Spnb2; Sptb2	Mus musculus (Mouse)	10090	Q62261	MGI:98388	Sptbn1	MGI:98388			3D-structure; Acetylation; Actin capping; Actin-binding; Alternative splicing; Calmodulin-binding; Cell membrane; Cytoplasm; Cytoskeleton; Glycoprotein; Membrane; Phosphoprotein; Repeat
175	O35639	Annexin A3 OS=Mus musculus GN=Anxa3 PE=1 SV=4 - [ANXA3_MOUSE]	18	25	51	26	1689901	361108	1407740	672054	1818428	265192		1.03574e+06	1.70068e+06	338610	1.53056e+06	685033	1.93259e+06	241489	1.72127e+06	421711	-4.08164	-2.28274	2.68546e-12	9.88438e-11	FALSE	high	O35639	Annexin A3	35-alpha calcimedin; Annexin III; Annexin-3; Lipocortin III; Placental anticoagulant protein III (PAP-III)	ANXA3_MOUSE	O35639	Q3UBI0	Anxa3	Anx3	Mus musculus (Mouse)	10090	O35639	MGI:1201378	Anxa3	MGI:1201378			Acetylation; Annexin; Calcium; Calcium/phospholipid-binding; Phospholipase A2 inhibitor; Repeat
176	P35550	rRNA 2'-O-methyltransferase fibrillarin OS=Mus musculus GN=Fbl PE=2 SV=2 - [FBRL_MOUSE]	15	18	40	22	1270903	868379	1116383	653014	1193465	1102260		1.03407e+06	1.27901e+06	814277	1.21378e+06	665626	1.26839e+06	1.00374e+06	1.25373e+06	827881	-1.51438	-0.729618	0.0136349	0.025748	FALSE	med	P35550	rRNA 2'-O-methyltransferase fibrillarin	Histone-glutamine methyltransferase; Nucleolar protein 1	FBRL_MOUSE	P35550	Q99L58	Fbl	na	Mus musculus (Mouse)	10090	P35550	MGI:95486	Fbl	MGI:95486			Methylation; Methyltransferase; Nucleus; Phosphoprotein; Ribonucleoprotein; RNA-binding; rRNA processing; S-adenosyl-L-methionine; Transferase
177	Q8BMK4	Cytoskeleton-associated protein 4 OS=Mus musculus GN=Ckap4 PE=1 SV=2 - [CKAP4_MOUSE]	20	34	67	29	435886	1722598	387909	1112164	407385	2119100		1.03084e+06	438665	1.61528e+06	421752	1.13364e+06	432960	1.92969e+06	431126	1.55954e+06	3.61736	1.7101	1.65618e-08	1.76828e-07	FALSE	high	Q8BMK4	Cytoskeleton-associated protein 4	63-kDa cytoskeleton-linking membrane protein (Climp-63; p63)	CKAP4_MOUSE	Q8BMK4	B2RRB4; Q8BTK8; Q8R3F2	Ckap4	na	Mus musculus (Mouse)	10090	Q8BMK4	MGI:2444926	Ckap4	MGI:2444926			Acetylation; Cell membrane; Coiled coil; Cytoplasm; Cytoskeleton; Endoplasmic reticulum; Lipoprotein; Membrane; Palmitate; Phosphoprotein; Signal-anchor; Transmembrane; Transmembrane helix
178	P46471	26S protease regulatory subunit 7 OS=Mus musculus GN=Psmc2 PE=1 SV=5 - [PRS7_MOUSE]	21	28	65	40	1050215	1190771	993243	1036937	943571	968748		1.03058e+06	1.05691e+06	1.11658e+06	1.0799e+06	1.05696e+06	1.00281e+06	882160	1.04654e+06	1.01857e+06	-1.02746	-0.156161	0.59336	0.668925	FALSE	no	P46471	26S protease regulatory subunit 7	26S proteasome AAA-ATPase subunit RPT1; Proteasome 26S subunit ATPase 2; Protein MSS1	PRS7_MOUSE	P46471	O08531; Q3TGX5; Q9DBA1	Psmc2	Mss1	Mus musculus (Mouse)	10090	P46471	MGI:109555	Psmc2	MGI:109555			Acetylation; ATP-binding; Cytoplasm; Nucleotide-binding; Nucleus; Proteasome
179	E9Q555	E3 ubiquitin-protein ligase RNF213 OS=Mus musculus GN=Rnf213 PE=2 SV=1 - [RN213_MOUSE]	86	161	221	77	978294	1732742	626449	739328	650772	1453242		1.03014e+06	984532	1.62479e+06	681103	753607	691626	1.32335e+06	785754	1.23392e+06	1.57036	0.491	0.0973738	0.145817	FALSE	no	E9Q555	E3 ubiquitin-protein ligase RNF213	na	RN213_MOUSE	E9Q555	Q8BVK6	Rnf213	na	Mus musculus (Mouse)	10090	E9Q555	MGI:1289196	Rnf213	MGI:1289196			Coiled coil; Cytoplasm; Ligase; Metal-binding; Ubl conjugation; Ubl conjugation pathway; Zinc; Zinc-finger
180	Q60597	2-oxoglutarate dehydrogenase, mitochondrial OS=Mus musculus GN=Ogdh PE=1 SV=3 - [ODO1_MOUSE]	29	41	73	40	463880	1463833	392272	1125127	425284	2275676		1.02435e+06	466838	1.37263e+06	426495	1.14686e+06	451982	2.07227e+06	448439	1.53059e+06	3.41315	1.61446	1.04627e-07	8.34633e-07	FALSE	high	Q60597	2-oxoglutarate dehydrogenase, mitochondrial	2-oxoglutarate dehydrogenase complex component E1 (OGDC-E1); Alpha-ketoglutarate dehydrogenase	ODO1_MOUSE	Q60597	Q3UDM7; Q5DTI4; Q5SVX7; Q5SVX9; Q6PFZ2; Q80Y57; Q8K0K7; Q8K2Z3; Q8R3M2; Q91WP2	Ogdh	Kiaa4192	Mus musculus (Mouse)	10090	Q60597	MGI:1098267	Ogdh	MGI:1098267			3D-structure; Acetylation; Alternative splicing; Calcium; Glycolysis; Isopeptide bond; Metal-binding; Mitochondrion; Oxidoreductase; Thiamine pyrophosphate; Transit peptide; Ubl conjugation
181	P62754	40S ribosomal protein S6 OS=Mus musculus GN=Rps6 PE=1 SV=1 - [RS6_MOUSE]	10	14	35	20	1483903	644612	1405877	788330	1341008	455627		1.01989e+06	1.49337e+06	604451	1.52853e+06	803555	1.42519e+06	414903	1.48236e+06	607636	-2.43956	-1.44883	1.59462e-06	8.39524e-06	FALSE	high	P62754	40S ribosomal protein S6	Phosphoprotein NP33	RS6_MOUSE	P62754	P08227; P10660	Rps6	na	Mus musculus (Mouse)	10090	P62754	MGI:98159	Rps6	MGI:98159			Acetylation; Phosphoprotein; Ribonucleoprotein; Ribosomal protein
182	Q62448	Eukaryotic translation initiation factor 4 gamma 2 OS=Mus musculus GN=Eif4g2 PE=1 SV=2 - [IF4G2_MOUSE]	22	36	72	38	804891	1815828	649089	960494	687749	1159596		1.01294e+06	810023	1.7027e+06	705718	979044	730924	1.05595e+06	748889	1.2459e+06	1.66366	0.580827	0.0482954	0.0788205	FALSE	low	Q62448	Eukaryotic translation initiation factor 4 gamma 2 (eIF-4-gamma 2; eIF-4G 2; eIF4G 2)	Novel APOBEC-1 target 1; Translation repressor NAT1; p97	IF4G2_MOUSE	Q62448	P97867; Q0VGZ3; Q3UNC1; Q5XKD8; Q6P1Z0; Q921U3	Eif4g2	na	Mus musculus (Mouse)	10090	Q62448	MGI:109207	Eif4g2	MGI:109207			Acetylation; Alternative splicing; Initiation factor; Phosphoprotein; Protein biosynthesis; Repressor; Translation regulation
183	P61979	Heterogeneous nuclear ribonucleoprotein K OS=Mus musculus GN=Hnrnpk PE=1 SV=1 - [HNRPK_MOUSE]	13	21	59	34	1684465	567270	1492679	454740	1470251	357692		1.00452e+06	1.69521e+06	531928	1.62291e+06	463522	1.56255e+06	325721	1.62689e+06	440390	-3.69419	-2.02447	3.05642e-11	8.38217e-10	FALSE	high	P61979	Heterogeneous nuclear ribonucleoprotein K (hnRNP K)	na	HNRPK_MOUSE	P61979	Q07244; Q15671; Q60577; Q8BGQ8; Q922Y7; Q96J62	Hnrnpk	Hnrpk	Mus musculus (Mouse)	10090	P61979	MGI:99894	Hnrnpk	MGI:99894			Acetylation; Activator; Alternative splicing; Cell junction; Cell projection; Cytoplasm; DNA-binding; Glycoprotein; Isopeptide bond; Methylation; mRNA processing; mRNA splicing; Nucleus; Phosphoprotein; Repeat; Repressor; Ribonucleoprotein; RNA-binding; Spliceosome; Transcription; Transcription regulation; Ubl conjugation
184	P51150	Ras-related protein Rab-7a OS=Mus musculus GN=Rab7a PE=1 SV=2 - [RAB7A_MOUSE]	17	18	38	31	508092	1519141	433667	1724689	467787	1344234		999602	511332	1.4245e+06	471502	1.758e+06	497154	1.22408e+06	493329	1.46886e+06	2.97744	1.44767	1.41761e-06	7.54858e-06	FALSE	high	P51150	Ras-related protein Rab-7a	na	RAB7A_MOUSE	P51150	na	Rab7a	Rab7	Mus musculus (Mouse)	10090	P51150	MGI:105068	Rab7	MGI:105068			Cytoplasmic vesicle; Endosome; GTP-binding; Lipoprotein; Lysosome; Membrane; Methylation; Nucleotide-binding; Phosphoprotein; Prenylation; Protein transport; Transport
185	P14824	Annexin A6 OS=Mus musculus GN=Anxa6 PE=1 SV=3 - [ANXA6_MOUSE]	27	47	68	34	1091861	1127086	950538	1329129	995415	494690		998120	1.09882e+06	1.05687e+06	1.03347e+06	1.3548e+06	1.05791e+06	450474	1.0634e+06	954046	-1.11462	-0.406555	0.184648	0.253861	FALSE	no	P14824	Annexin A6	67 kDa calelectrin; Annexin VI; Annexin-6; Calphobindin-II (CPB-II); Chromobindin-20; Lipocortin VI; Protein III; p68; p70	ANXA6_MOUSE	P14824	Q8BSS4	Anxa6	Anx6	Mus musculus (Mouse)	10090	P14824	MGI:88255	Anxa6	MGI:88255			Acetylation; Annexin; Calcium; Calcium/phospholipid-binding; Cytoplasm; Phosphoprotein; Repeat
186	P35980	60S ribosomal protein L18 OS=Mus musculus GN=Rpl18 PE=2 SV=3 - [RL18_MOUSE]	9	16	34	19	1277161	979677	1217382	847742	1022018	643303		997880	1.2853e+06	918641	1.32359e+06	864114	1.08618e+06	585804	1.23169e+06	789520	-1.56005	-0.774058	0.00854672	0.0168366	FALSE	med	P35980	60S ribosomal protein L18	na	RL18_MOUSE	P35980	Q9CQF1; Q9D987	Rpl18	na	Mus musculus (Mouse)	10090	P35980	MGI:98003	Rpl18	MGI:98003			Cytoplasm; Phosphoprotein; Ribonucleoprotein; Ribosomal protein
187	Q8BH04	Phosphoenolpyruvate carboxykinase [GTP], mitochondrial OS=Mus musculus GN=Pck2 PE=1 SV=1 - [PCKGM_MOUSE]	19	34	68	37	628329	1997624	194422	667595	399552	2094914		997073	632336	1.87317e+06	211384	680488	424635	1.90767e+06	422785	1.48711e+06	3.51741	1.69594	2.17812e-08	2.21293e-07	FALSE	high	Q8BH04	Phosphoenolpyruvate carboxykinase [GTP], mitochondrial (PEPCK-M)	na	PCKGM_MOUSE	Q8BH04	Q8BMM9; Q91Z10	Pck2	na	Mus musculus (Mouse)	10090	Q8BH04	MGI:1860456	Pck2	MGI:1860456			Decarboxylase; Gluconeogenesis; GTP-binding; Lyase; Manganese; Metal-binding; Mitochondrion; Nucleotide-binding; Transit peptide
188	Q9CXW4	60S ribosomal protein L11 OS=Mus musculus GN=Rpl11 PE=1 SV=4 - [RL11_MOUSE]	8	9	26	11	1155737	929784	1148039	867058	1117656	673953		982038	1.16311e+06	871857	1.2482e+06	883803	1.18782e+06	613714	1.19971e+06	789791	-1.51902	-0.732633	0.0129516	0.0246096	FALSE	med	Q9CXW4	60S ribosomal protein L11	na	RL11_MOUSE	Q9CXW4	Q3TPE3; Q6ZWY0	Rpl11	na	Mus musculus (Mouse)	10090	Q9CXW4	MGI:1914275	Rpl11	MGI:1914275			Acetylation; Nucleus; Phosphoprotein; Ribonucleoprotein; Ribosomal protein; RNA-binding; rRNA-binding
189	P80317	T-complex protein 1 subunit zeta OS=Mus musculus GN=Cct6a PE=1 SV=3 - [TCPZ_MOUSE]	25	32	85	39	1151064	891252	1079042	981084	1123739	601717		971316	1.1584e+06	835725	1.17318e+06	1.00003e+06	1.19428e+06	547935	1.17529e+06	794564	-1.47916	-0.71896	0.0156757	0.0291299	FALSE	med	P80317	T-complex protein 1 subunit zeta (TCP-1-zeta)	CCT-zeta-1	TCPZ_MOUSE	P80317	na	Cct6a	Cct6; Cctz; Cctz1	Mus musculus (Mouse)	10090	P80317	MGI:107943	Cct6a	MGI:107943			Acetylation; ATP-binding; Chaperone; Cytoplasm; Nucleotide-binding
190	P09055	Integrin beta-1 OS=Mus musculus GN=Itgb1 PE=1 SV=1 - [ITB1_MOUSE]	21	31	66	29	590910	1088171	534059	2062320	522294	989985		964623	594678	1.02038e+06	580652	2.10215e+06	555083	901499	576804	1.34134e+06	2.32547	0.995938	0.00106474	0.00266679	FALSE	high	P09055	Integrin beta-1	Fibronectin receptor subunit beta; VLA-4 subunit beta; CD_antigen=CD29	ITB1_MOUSE	P09055	F6R105; Q3TIW5; Q3TWH6; Q60993; Q61126; Q8BTU0; Q8BVU1	Itgb1	na	Mus musculus (Mouse)	10090	P09055	MGI:96610	Itgb1	MGI:96610			Acetylation; Alternative splicing; Cell adhesion; Cell junction; Cell membrane; Cell projection; Disulfide bond; Endosome; Glycoprotein; Integrin; Magnesium; Membrane; Metal-binding; Phosphoprotein; Receptor; Repeat; Signal; Transmembrane; Transmembrane helix
191	Q6IRU2	Tropomyosin alpha-4 chain OS=Mus musculus GN=Tpm4 PE=2 SV=3 - [TPM4_MOUSE]	9	22	42	21	1374073	339158	1325858	1080411	1427024	155192		950286	1.38283e+06	318028	1.44153e+06	1.10128e+06	1.51661e+06	141321	1.44699e+06	520209	-2.78156	-2.11181	7.81747e-05	0.000257878	FALSE	high	Q6IRU2	Tropomyosin alpha-4 chain	Tropomyosin-4	TPM4_MOUSE	Q6IRU2	na	Tpm4	na	Mus musculus (Mouse)	10090	Q6IRU2	MGI:2449202	Tpm4	MGI:2449202			Acetylation; Actin-binding; Calcium; Coiled coil; Cytoplasm; Cytoskeleton; Metal-binding; Muscle protein
192	Q7TPR4	Alpha-actinin-1 OS=Mus musculus GN=Actn1 PE=1 SV=1 - [ACTN1_MOUSE]	17	50	100	23	1224337	543886	1090109	1336828	1117136	380406		948784	1.23214e+06	510001	1.18521e+06	1.36265e+06	1.18727e+06	346405	1.20154e+06	739684	-1.6244	-1.07624	0.000957711	0.00242667	FALSE	high	Q7TPR4	Alpha-actinin-1	Alpha-actinin cytoskeletal isoform; F-actin cross-linking protein; Non-muscle alpha-actinin-1	ACTN1_MOUSE	Q7TPR4	na	Actn1	na	Mus musculus (Mouse)	10090	Q7TPR4	MGI:2137706	Actn1	MGI:2137706			Acetylation; Actin-binding; Calcium; Cell junction; Cell membrane; Cell projection; Cytoplasm; Cytoskeleton; Membrane; Metal-binding; Phosphoprotein; Repeat
193	P19253	60S ribosomal protein L13a OS=Mus musculus GN=Rpl13a PE=1 SV=4 - [RL13A_MOUSE]	9	19	31	16	1217335	870175	1115032	784030	1033522	635378		942579	1.2251e+06	815962	1.21231e+06	799172	1.0984e+06	578587	1.1786e+06	731240	-1.61179	-0.814709	0.0056544	0.0117049	FALSE	med	P19253	60S ribosomal protein L13a	Transplantation antigen P198; Tum-P198 antigen	RL13A_MOUSE	P19253	na	Rpl13a	P198; Tstap198-7	Mus musculus (Mouse)	10090	P19253	MGI:1351455	Rpl13a	MGI:1351455			Acetylation; Citrullination; Phosphoprotein; Polymorphism; Ribonucleoprotein; Ribosomal protein; Translation regulation; Tumor antigen
194	P28656	Nucleosome assembly protein 1-like 1 OS=Mus musculus GN=Nap1l1 PE=1 SV=2 - [NP1L1_MOUSE]	12	18	61	33	1262526	726448	1273875	717727	1223308	445493		941563	1.27058e+06	681189	1.38501e+06	731588	1.3001e+06	405674	1.31856e+06	606151	-2.17531	-1.27662	2.05195e-05	7.7816e-05	FALSE	high	P28656	Nucleosome assembly protein 1-like 1	Brain protein DN38; NAP-1-related protein	NP1L1_MOUSE	P28656	Q3UL14	Nap1l1	Nrp	Mus musculus (Mouse)	10090	P28656	MGI:1855693	Nap1l1	MGI:1855693			Acetylation; Lipoprotein; Methylation; Nucleus; Phosphoprotein; Prenylation
195	Q9EPU0	Regulator of nonsense transcripts 1 OS=Mus musculus GN=Upf1 PE=1 SV=2 - [RENT1_MOUSE]	32	47	76	44	799500	1488803	762519	898545	761283	937560		941368	804598	1.39605e+06	829044	915899	809075	853760	814239	1.05524e+06	1.29598	0.227778	0.438099	0.52268	FALSE	no	Q9EPU0	Regulator of nonsense transcripts 1	ATP-dependent helicase RENT1; Nonsense mRNA reducing factor 1 (NORF1); Up-frameshift suppressor 1 homolog (mUpf1)	RENT1_MOUSE	Q9EPU0	Q3UG00; Q6GYP5; Q6PHQ5; Q8K0N4; Q99PR4	Upf1	Rent1	Mus musculus (Mouse)	10090	Q9EPU0	MGI:107995	Upf1	MGI:107995			Alternative splicing; ATP-binding; Cytoplasm; Helicase; Hydrolase; Metal-binding; Nonsense-mediated mRNA decay; Nucleotide-binding; Nucleus; Phosphoprotein; Repeat; RNA-binding; Zinc; Zinc-finger
196	P47911	60S ribosomal protein L6 OS=Mus musculus GN=Rpl6 PE=1 SV=3 - [RL6_MOUSE]	11	21	41	24	1077756	750485	1137840	833768	1203646	642846		941057	1.08463e+06	703728	1.23711e+06	849871	1.27921e+06	585388	1.20032e+06	712996	-1.68348	-0.875061	0.00310282	0.00692892	FALSE	high	P47911	60S ribosomal protein L6	TAX-responsive enhancer element-binding protein 107 (TAXREB107)	RL6_MOUSE	P47911	Q6P5I2; Q925C3	Rpl6	na	Mus musculus (Mouse)	10090	P47911	MGI:108057	Rpl6	MGI:108057			Acetylation; Phosphoprotein; Ribonucleoprotein; Ribosomal protein
197	P48036	Annexin A5 OS=Mus musculus GN=Anxa5 PE=1 SV=1 - [ANXA5_MOUSE]	14	19	44	32	1283483	645803	964874	1230449	1108883	380601		935682	1.29167e+06	605568	1.04905e+06	1.25421e+06	1.1785e+06	346582	1.17307e+06	735454	-1.59503	-0.991056	0.00227702	0.00525833	FALSE	high	P48036	Annexin A5	Anchorin CII; Annexin V; Annexin-5; Calphobindin I (CBP-I); Endonexin II; Lipocortin V; Placental anticoagulant protein 4 (PP4); Placental anticoagulant protein I (PAP-I); Thromboplastin inhibitor; Vascular anticoagulant-alpha (VAC-alpha)	ANXA5_MOUSE	P48036	Q3U5Q1; Q3U5X4; Q3U8K1; Q3UGV0; Q99LA1	Anxa5	Anx5	Mus musculus (Mouse)	10090	P48036	MGI:106008	Anxa5	MGI:106008			Acetylation; Annexin; Blood coagulation; Calcium; Calcium/phospholipid-binding; Hemostasis; Repeat
198	Q9D0I9	Arginine--tRNA ligase, cytoplasmic OS=Mus musculus GN=Rars PE=2 SV=2 - [SYRC_MOUSE]	24	36	82	39	1236537	897009	986800	855206	1059023	575996		935095	1.24442e+06	841124	1.07289e+06	871723	1.12551e+06	524513	1.14761e+06	745786	-1.53879	-0.766178	0.00984591	0.0191977	FALSE	med	Q9D0I9	Arginine--tRNA ligase, cytoplasmic	Arginyl-tRNA synthetase (ArgRS)	SYRC_MOUSE	Q9D0I9	Q3THP2; Q3TM73; Q3U8R2; Q3U930; Q5SXA8; Q8VDW1	Rars	na	Mus musculus (Mouse)	10090	Q9D0I9	MGI:1914297	Rars	MGI:1914297			Acetylation; Aminoacyl-tRNA synthetase; ATP-binding; Cytoplasm; Ligase; Nucleotide-binding; Protein biosynthesis
199	Q99MN1	Lysine--tRNA ligase OS=Mus musculus GN=Kars PE=1 SV=1 - [SYK_MOUSE]	19	36	56	33	1069935	955349	984955	761954	1096836	736700		934288	1.07676e+06	895829	1.07089e+06	776670	1.16569e+06	670853	1.10445e+06	781117	-1.41393	-0.619149	0.0350937	0.0594722	FALSE	low	Q99MN1	Lysine--tRNA ligase	Lysyl-tRNA synthetase (LysRS)	SYK_MOUSE	Q99MN1	na	Kars	na	Mus musculus (Mouse)	10090	Q99MN1	MGI:1934754	Kars	MGI:1934754			Acetylation; Aminoacyl-tRNA synthetase; ATP-binding; Cytoplasm; Ligase; Metal-binding; Nucleotide-binding; Protein biosynthesis
200	Q9DCD0	6-phosphogluconate dehydrogenase, decarboxylating OS=Mus musculus GN=Pgd PE=1 SV=3 - [6PGD_MOUSE]	16	20	34	22	1420867	336440	1312550	762965	1367279	375629		929288	1.42993e+06	315479	1.42706e+06	777700	1.45311e+06	342055	1.4367e+06	478411	-3.00307	-1.83125	5.35863e-09	6.79299e-08	FALSE	high	Q9DCD0	6-phosphogluconate dehydrogenase, decarboxylating	na	6PGD_MOUSE	Q9DCD0	Q3UD80	Pgd	na	Mus musculus (Mouse)	10090	Q9DCD0	MGI:97553	Pgd	MGI:97553			Acetylation; Cytoplasm; Gluconate utilization; NADP; Oxidoreductase; Pentose shunt; Phosphoprotein
201	Q61024	Asparagine synthetase [glutamine-hydrolyzing] OS=Mus musculus GN=Asns PE=2 SV=3 - [ASNS_MOUSE]	17	30	55	27	1366652	829966	785925	755984	1164123	666935		928264	1.37537e+06	778258	854492	770584	1.2372e+06	607324	1.15569e+06	718722	-1.60798	-0.77816	0.00917687	0.0180019	FALSE	med	Q61024	Asparagine synthetase [glutamine-hydrolyzing]	Glutamine-dependent asparagine synthetase	ASNS_MOUSE	Q61024	Q3TJA1; Q8BPC8	Asns	na	Mus musculus (Mouse)	10090	Q61024	MGI:1350929	Asns	MGI:1350929			Acetylation; Amino-acid biosynthesis; Asparagine biosynthesis; ATP-binding; Glutamine amidotransferase; Ligase; Nucleotide-binding
202	D3Z7P3	Glutaminase kidney isoform, mitochondrial OS=Mus musculus GN=Gls PE=1 SV=1 - [GLSK_MOUSE]	21	35	75	34	486248	1209226	361200	1182973	411729	1905846		926204	489349	1.13389e+06	392712	1.20582e+06	437576	1.7355e+06	439879	1.3584e+06	3.08813	1.49616	7.68829e-07	4.45279e-06	FALSE	high	D3Z7P3	Glutaminase kidney isoform, mitochondrial (GLS)	na	GLSK_MOUSE	D3Z7P3	E9PUF0; Q69ZX9	Gls	Gls1; Kiaa0838	Mus musculus (Mouse)	10090	D3Z7P3	MGI:95752	Gls	MGI:95752			3D-structure; Acetylation; Alternative splicing; ANK repeat; Cytoplasm; Hydrolase; Mitochondrion; Repeat; Transit peptide
203	Q99PV0	Pre-mRNA-processing-splicing factor 8 OS=Mus musculus GN=Prpf8 PE=1 SV=2 - [PRP8_MOUSE]	61	92	142	66	1006832	727878	1068639	818534	1044359	865776		922003	1.01325e+06	682530	1.16187e+06	834342	1.10992e+06	788392	1.09501e+06	768421	-1.42502	-0.624296	0.033442	0.0570417	FALSE	low	Q99PV0	Pre-mRNA-processing-splicing factor 8	Splicing factor Prp8	PRP8_MOUSE	Q99PV0	A5D6Q4; Q5ND30; Q5ND31; Q7TQK2; Q8BRZ5; Q8K001	Prpf8	Prp8	Mus musculus (Mouse)	10090	Q99PV0	MGI:2179381	Prpf8	MGI:2179381			Acetylation; mRNA processing; mRNA splicing; Nucleus; Phosphoprotein; Ribonucleoprotein; RNA-binding; Spliceosome
204	Q9Z2U0	Proteasome subunit alpha type-7 OS=Mus musculus GN=Psma7 PE=1 SV=1 - [PSA7_MOUSE]	11	15	39	20	984708	812839	976312	856785	1099328	783720		918949	990987	762198	1.06149e+06	873332	1.16834e+06	713670	1.07361e+06	783067	-1.37103	-0.56778	0.0532509	0.0857738	FALSE	low	Q9Z2U0	Proteasome subunit alpha type-7	Proteasome subunit RC6-1	PSA7_MOUSE	Q9Z2U0	na	Psma7	na	Mus musculus (Mouse)	10090	Q9Z2U0	MGI:1347070	Psma7	MGI:1347070			3D-structure; Acetylation; Cytoplasm; Glycoprotein; Hydrolase; Nucleus; Phosphoprotein; Protease; Proteasome; Threonine protease
205	P63037	DnaJ homolog subfamily A member 1 OS=Mus musculus GN=Dnaja1 PE=1 SV=1 - [DNJA1_MOUSE]	10	18	48	18	446421	1090016	500706	1776144	450431	1216404		913354	449268	1.02211e+06	544389	1.81045e+06	478708	1.10768e+06	490788	1.31341e+06	2.67612	1.26549	2.31114e-05	8.61237e-05	FALSE	high	P63037	DnaJ homolog subfamily A member 1	DnaJ protein homolog 2; Heat shock 40 kDa protein 4; Heat shock protein J2 (HSJ-2)	DNJA1_MOUSE	P63037	P54102	Dnaja1	Dnaj2; Hsj2; Hspf4	Mus musculus (Mouse)	10090	P63037	MGI:1270129	Dnaja1	MGI:1270129			Acetylation; Chaperone; Cytoplasm; Endoplasmic reticulum; Lipoprotein; Membrane; Metal-binding; Methylation; Microsome; Mitochondrion; Nucleus; Phosphoprotein; Prenylation; Repeat; Zinc; Zinc-finger
206	Q8BHN3	Neutral alpha-glucosidase AB OS=Mus musculus GN=Ganab PE=1 SV=1 - [GANAB_MOUSE]	32	43	74	42	735622	1153152	615361	811037	720535	1394200		904984	740313	1.08131e+06	669047	826701	765769	1.26958e+06	725043	1.0592e+06	1.46088	0.416264	0.155926	0.219405	FALSE	no	Q8BHN3	Neutral alpha-glucosidase AB	Alpha-glucosidase 2; Glucosidase II subunit alpha	GANAB_MOUSE	Q8BHN3	O08794; Q149A6; Q80U81; Q9CS53	Ganab	G2an; Kiaa0088	Mus musculus (Mouse)	10090	Q8BHN3	MGI:1097667	Ganab	MGI:1097667			Alternative splicing; Endoplasmic reticulum; Glycoprotein; Glycosidase; Golgi apparatus; Hydrolase; Signal
207	Q3TXS7	26S proteasome non-ATPase regulatory subunit 1 OS=Mus musculus GN=Psmd1 PE=1 SV=1 - [PSMD1_MOUSE]	28	42	81	43	827052	1112690	763894	902162	777505	1020447		900625	832326	1.04337e+06	830539	919585	826315	929238	829727	964064	1.16191	0.103496	0.722816	0.781684	FALSE	no	Q3TXS7	26S proteasome non-ATPase regulatory subunit 1	26S proteasome regulatory subunit RPN2; 26S proteasome regulatory subunit S1	PSMD1_MOUSE	Q3TXS7	B2RRP8	Psmd1	na	Mus musculus (Mouse)	10090	Q3TXS7	MGI:1917497	Psmd1	MGI:1917497			Acetylation; Phosphoprotein; Proteasome; Repeat
208	Q9CY58	Plasminogen activator inhibitor 1 RNA-binding protein OS=Mus musculus GN=Serbp1 PE=1 SV=2 - [PAIRB_MOUSE]	14	24	35	21	1502590	221343	1463165	408564	1497357	250963		890664	1.51217e+06	207553	1.59082e+06	416455	1.59136e+06	228532	1.56478e+06	284180	-5.50631	-2.64571	6.43884e-17	7.10984e-15	FALSE	high	Q9CY58	Plasminogen activator inhibitor 1 RNA-binding protein	PAI1 RNA-binding protein 1 (PAI-RBP1); SERPINE1 mRNA-binding protein 1	PAIRB_MOUSE	Q9CY58	Q8BHS2; Q8BHU0; Q91WP3; Q9CSN0; Q9DBY6	Serbp1	Pairbp1	Mus musculus (Mouse)	10090	Q9CY58	MGI:1914120	Serbp1	MGI:1914120			Acetylation; Alternative splicing; Cytoplasm; Nucleus; Phosphoprotein; RNA-binding
209	O70251	Elongation factor 1-beta OS=Mus musculus GN=Eef1b PE=1 SV=5 - [EF1B_MOUSE]	8	12	32	17	1311987	474349	1360265	503587	1256386	436041		890436	1.32035e+06	444796	1.47894e+06	513313	1.33526e+06	397067	1.37818e+06	451725	-3.05093	-1.72598	9.25719e-09	1.085e-07	FALSE	high	O70251	Elongation factor 1-beta (EF-1-beta)	na	EF1B_MOUSE	O70251	Q3THP5; Q5SUH1; Q8CHS1; Q99L22; Q9CZD4	Eef1b	Eef1b2	Mus musculus (Mouse)	10090	O70251	MGI:1929520	Eef1b2	MGI:1929520			Acetylation; Elongation factor; Phosphoprotein; Protein biosynthesis
210	P27659	60S ribosomal protein L3 OS=Mus musculus GN=Rpl3 PE=1 SV=3 - [RL3_MOUSE]	17	27	60	32	1056403	838189	1019337	819842	934565	581884		875037	1.06314e+06	785968	1.10827e+06	835676	993235	529874	1.05488e+06	717173	-1.47089	-0.693734	0.0184218	0.0334622	FALSE	med	P27659	60S ribosomal protein L3	J1 protein	RL3_MOUSE	P27659	O89071; Q91VJ6	Rpl3	na	Mus musculus (Mouse)	10090	P27659	MGI:1351605	Rpl3	MGI:1351605			Acetylation; Cytoplasm; Nucleus; Phosphoprotein; Ribonucleoprotein; Ribosomal protein
211	Q05769	Prostaglandin G/H synthase 2 OS=Mus musculus GN=Ptgs2 PE=1 SV=1 - [PGH2_MOUSE]	17	23	57	35	291329	758641	313460	1961606	264533	1646801		872728	293187	711376	340807	1.99949e+06	281140	1.49961e+06	305045	1.40349e+06	4.60094	1.97932	3.49476e-10	6.91698e-09	FALSE	high	Q05769	Prostaglandin G/H synthase 2	Cyclooxygenase-2 (COX-2); Glucocorticoid-regulated inflammatory cyclooxygenase; Gripghs; Macrophage activation-associated marker protein P71/73; PES-2; PHS II; Prostaglandin H2 synthase 2 (PGH synthase 2; PGHS-2); Prostaglandin-endoperoxide synthase 2; TIS10 protein	PGH2_MOUSE	Q05769	Q543K3	Ptgs2	Cox-2; Cox2; Pghs-b; Tis10	Mus musculus (Mouse)	10090	Q05769	MGI:97798	Ptgs2	MGI:97798			3D-structure; Dioxygenase; Disulfide bond; Endoplasmic reticulum; Fatty acid biosynthesis; Fatty acid metabolism; Glycoprotein; Heme; Iron; Lipid biosynthesis; Lipid metabolism; Membrane; Metal-binding; Microsome; Oxidoreductase; Peroxidase; Prostaglandin biosynthesis; Prostaglandin metabolism; S-nitrosylation; Signal
212	Q9D051	Pyruvate dehydrogenase E1 component subunit beta, mitochondrial OS=Mus musculus GN=Pdhb PE=1 SV=1 - [ODPB_MOUSE]	11	15	37	24	358492	1312217	233810	997625	346195	1938503		864474	360778	1.23046e+06	254208	1.01689e+06	367928	1.76524e+06	327638	1.33753e+06	4.08234	1.9004	3.86984e-10	7.51753e-09	FALSE	high	Q9D051	Pyruvate dehydrogenase E1 component subunit beta, mitochondrial (PDHE1-B)	na	ODPB_MOUSE	Q9D051	Q3TL86; Q505N8; Q99LW9	Pdhb	na	Mus musculus (Mouse)	10090	Q9D051	MGI:1915513	Pdhb	MGI:1915513			Acetylation; Carbohydrate metabolism; Glucose metabolism; Mitochondrion; Oxidoreductase; Phosphoprotein; Pyruvate; Thiamine pyrophosphate; Transit peptide; Tricarboxylic acid cycle
213	P62334	26S protease regulatory subunit 10B OS=Mus musculus GN=Psmc6 PE=1 SV=1 - [PRS10_MOUSE]	15	22	48	29	808458	1032098	766996	1004660	697236	865026		862412	813613	967796	833911	1.02406e+06	741007	787709	796177	926523	1.16371	0.100997	0.729376	0.787358	FALSE	no	P62334	26S protease regulatory subunit 10B	26S proteasome AAA-ATPase subunit RPT4; Proteasome 26S subunit ATPase 6; Proteasome subunit p42	PRS10_MOUSE	P62334	P49719; Q3TKK1; Q810A6; Q92524; Q9CXH9	Psmc6	Sug2	Mus musculus (Mouse)	10090	P62334	MGI:1914339	Psmc6	MGI:1914339			Acetylation; ATP-binding; Cytoplasm; Nucleotide-binding; Nucleus; Proteasome
214	P62242	40S ribosomal protein S8 OS=Mus musculus GN=Rps8 PE=1 SV=2 - [RS8_MOUSE]	8	12	28	17	1105635	641779	1092520	782547	1120487	418592		860260	1.11269e+06	601795	1.18784e+06	797660	1.19083e+06	381178	1.16378e+06	593544	-1.96073	-1.14517	0.000142051	0.000437303	FALSE	high	P62242	40S ribosomal protein S8	na	RS8_MOUSE	P62242	P09058; Q8C2G6	Rps8	na	Mus musculus (Mouse)	10090	P62242	MGI:98166	Rps8	MGI:98166			Acetylation; Cytoplasm; Ribonucleoprotein; Ribosomal protein
215	P62082	40S ribosomal protein S7 OS=Mus musculus GN=Rps7 PE=2 SV=1 - [RS7_MOUSE]	8	9	36	27	1123874	620516	1110362	645756	1051863	533597		847661	1.13104e+06	581857	1.20723e+06	658227	1.1179e+06	485903	1.15206e+06	575329	-2.00243	-1.12267	0.0001476	0.000451405	FALSE	high	P62082	40S ribosomal protein S7	na	RS7_MOUSE	P62082	P23821; P24818	Rps7	na	Mus musculus (Mouse)	10090	P62082	MGI:1333818	Rps7	MGI:1333818			Acetylation; Cytoplasm; Cytoskeleton; Ribonucleoprotein; Ribosomal protein
216	Q9D819	Inorganic pyrophosphatase OS=Mus musculus GN=Ppa1 PE=1 SV=1 - [IPYR_MOUSE]	15	21	40	25	1500685	350753	1218848	638452	1149797	220737		846545	1.51025e+06	328900	1.32518e+06	650782	1.22198e+06	201007	1.35247e+06	393563	-3.43648	-2.0622	9.19819e-11	2.19293e-09	FALSE	high	Q9D819	Inorganic pyrophosphatase	Pyrophosphate phospho-hydrolase (PPase)	IPYR_MOUSE	Q9D819	na	Ppa1	Pp; Pyp	Mus musculus (Mouse)	10090	Q9D819	MGI:97831	Ppa1	MGI:97831			Acetylation; Cytoplasm; Hydrolase; Magnesium; Metal-binding; Phosphoprotein
217	Q9WTI7	Unconventional myosin-Ic OS=Mus musculus GN=Myo1c PE=1 SV=2 - [MYO1C_MOUSE]	29	51	80	37	608225	944624	607765	1588482	622070	706600		846294	612103	885772	660789	1.61916e+06	661122	643443	644671	1.04946e+06	1.6279	0.481935	0.109927	0.161843	FALSE	no	Q9WTI7	Unconventional myosin-Ic	Myosin I beta (MMI-beta; MMIb)	MYO1C_MOUSE	Q9WTI7	O08571; O08834; Q3TBQ4; Q3U231; Q5ND46; Q5ND48; Q5ND49; Q9ERB6; Q9QW54	Myo1c	na	Mus musculus (Mouse)	10090	Q9WTI7	MGI:106612	Myo1c	MGI:106612			3D-structure; Acetylation; Actin-binding; Alternative splicing; ATP-binding; Calmodulin-binding; Cell membrane; Cell projection; Cytoplasm; Cytoplasmic vesicle; Membrane; Methylation; Motor protein; mRNA transport; Myosin; Nuclear pore complex; Nucleotide-binding; Nucleus; Phosphoprotein; Protein transport; Repeat; Translocation; Transport
218	Q99LF4	tRNA-splicing ligase RtcB homolog OS=Mus musculus GN=Rtcb PE=2 SV=1 - [RTCB_MOUSE]	24	30	55	32	730976	1115510	724389	746663	851632	898600		844628	735637	1.04601e+06	787587	761083	905096	818282	809440	875126	1.08115	-0.00649053	0.982309	0.987977	FALSE	no	Q99LF4	tRNA-splicing ligase RtcB homolog	Focal adhesion-associated protein (FAAP)	RTCB_MOUSE	Q99LF4	Q3TA04; Q3TI25; Q3UDW6	Rtcb	D10Wsu52e	Mus musculus (Mouse)	10090	Q99LF4	MGI:106379	Rtcb	MGI:106379			ATP-binding; Cytoplasm; Ligase; Manganese; Metal-binding; Nucleotide-binding; Nucleus; tRNA processing
219	Q8BGQ7	Alanine--tRNA ligase, cytoplasmic OS=Mus musculus GN=Aars PE=1 SV=1 - [SYAC_MOUSE]	25	36	89	38	1066748	1027957	668408	882934	876639	533117		842634	1.07355e+06	963913	726722	899986	931673	485466	910648	783122	-1.16284	-0.373265	0.212978	0.286336	FALSE	no	Q8BGQ7	Alanine--tRNA ligase, cytoplasmic	Alanyl-tRNA synthetase (AlaRS)	SYAC_MOUSE	Q8BGQ7	Q8BXR0	Aars	na	Mus musculus (Mouse)	10090	Q8BGQ7	MGI:2384560	Aars	MGI:2384560			Acetylation; Aminoacyl-tRNA synthetase; ATP-binding; Cytoplasm; Ligase; Metal-binding; Nucleotide-binding; Phosphoprotein; Protein biosynthesis; RNA-binding; tRNA-binding; Ubl conjugation; Zinc
220	O09167	60S ribosomal protein L21 OS=Mus musculus GN=Rpl21 PE=2 SV=3 - [RL21_MOUSE]	6	13	34	21	1059385	812282	1052201	704653	957878	468196		842432	1.06614e+06	761675	1.144e+06	718262	1.01801e+06	426348	1.07605e+06	635428	-1.69342	-0.914141	0.00202833	0.00474672	FALSE	high	O09167	60S ribosomal protein L21	na	RL21_MOUSE	O09167	na	Rpl21	na	Mus musculus (Mouse)	10090	O09167	MGI:1278340	Rpl21	MGI:1278340			Ribonucleoprotein; Ribosomal protein
221	Q61598	Rab GDP dissociation inhibitor beta OS=Mus musculus GN=Gdi2 PE=1 SV=1 - [GDIB_MOUSE]	17	27	58	31	1243733	355444	1182622	675214	1277454	317270		841956	1.25166e+06	333299	1.2858e+06	688254	1.35765e+06	288912	1.29837e+06	436822	-2.97231	-1.79718	7.63004e-09	9.33401e-08	FALSE	high	Q61598	Rab GDP dissociation inhibitor beta (Rab GDI beta)	GDI-3; Guanosine diphosphate dissociation inhibitor 2 (GDI-2)	GDIB_MOUSE	Q61598	Q541Z9; Q8C530; Q9D8M9	Gdi2	Gdi3	Mus musculus (Mouse)	10090	Q61598	MGI:99845	Gdi2	MGI:99845			Acetylation; Alternative splicing; Cytoplasm; GTPase activation; Membrane
222	Q922B2	Aspartate--tRNA ligase, cytoplasmic OS=Mus musculus GN=Dars PE=2 SV=2 - [SYDC_MOUSE]	20	33	57	32	1063866	937792	881803	732097	938219	497265		841840	1.07065e+06	879366	958735	746236	997118	452819	1.00883e+06	692807	-1.45616	-0.704324	0.0175163	0.0320674	FALSE	med	Q922B2	Aspartate--tRNA ligase, cytoplasmic	Aspartyl-tRNA synthetase (AspRS)	SYDC_MOUSE	Q922B2	Q3U987	Dars	na	Mus musculus (Mouse)	10090	Q922B2	MGI:2442544	Dars	MGI:2442544			Acetylation; Aminoacyl-tRNA synthetase; ATP-binding; Cytoplasm; Ligase; Nucleotide-binding; Phosphoprotein; Protein biosynthesis
223	P62889	60S ribosomal protein L30 OS=Mus musculus GN=Rpl30 PE=2 SV=2 - [RL30_MOUSE]	7	8	31	19	977310	753966	1008647	780756	931310	573571		837593	983542	706993	1.09664e+06	795835	989776	522305	1.02332e+06	675044	-1.51593	-0.730915	0.0129558	0.0246096	FALSE	med	P62889	60S ribosomal protein L30	na	RL30_MOUSE	P62889	P04645	Rpl30	na	Mus musculus (Mouse)	10090	P62889	MGI:98037	Rpl30	MGI:98037			Acetylation; Phosphoprotein; Ribonucleoprotein; Ribosomal protein
224	Q6ZWN5	40S ribosomal protein S9 OS=Mus musculus GN=Rps9 PE=1 SV=3 - [RS9_MOUSE]	11	14	41	24	995700	742385	908207	912335	930334	535648		837435	1.00205e+06	696133	987442	929955	988738	487771	992743	704620	-1.40891	-0.65525	0.0275059	0.048018	FALSE	med	Q6ZWN5	40S ribosomal protein S9	na	RS9_MOUSE	Q6ZWN5	Q3UBF1; Q8K2D1	Rps9	na	Mus musculus (Mouse)	10090	Q6ZWN5	MGI:1924096	Rps9	MGI:1924096			Acetylation; Cytoplasm; Ribonucleoprotein; Ribosomal protein; RNA-binding; rRNA-binding
225	O08810	116 kDa U5 small nuclear ribonucleoprotein component OS=Mus musculus GN=Eftud2 PE=2 SV=1 - [U5S1_MOUSE]	32	40	76	42	900898	768828	974040	669371	927328	739415		829980	906643	720929	1.05902e+06	682299	985544	673325	983735	692184	-1.4212	-0.615454	0.035509	0.0601031	FALSE	low	O08810	116 kDa U5 small nuclear ribonucleoprotein component	Elongation factor Tu GTP-binding domain-containing protein 2; U5 snRNP-specific protein, 116 kDa (U5-116 kDa)	U5S1_MOUSE	O08810	na	Eftud2	Snrp116	Mus musculus (Mouse)	10090	O08810	MGI:1336880	Eftud2	MGI:1336880			Acetylation; GTP-binding; mRNA processing; mRNA splicing; Nucleotide-binding; Nucleus; Phosphoprotein; Spliceosome
226	Q9DCX2	ATP synthase subunit d, mitochondrial OS=Mus musculus GN=Atp5h PE=1 SV=3 - [ATP5H_MOUSE]	12	13	30	22	323125	1310790	304296	909951	340060	1733789		820335	325185	1.22913e+06	330844	927525	361408	1.57882e+06	339146	1.24516e+06	3.67145	1.73341	9.13123e-09	1.07625e-07	FALSE	high	Q9DCX2	ATP synthase subunit d, mitochondrial (ATPase subunit d)	na	ATP5H_MOUSE	Q9DCX2	B1ASE1; Q542H1; Q7M0I0; Q91YK9	Atp5h	na	Mus musculus (Mouse)	10090	Q9DCX2	MGI:1918929	Atp5h	MGI:1918929			Acetylation; CF(0); Hydrogen ion transport; Ion transport; Membrane; Mitochondrion; Mitochondrion inner membrane; Transport
227	P19783	Cytochrome c oxidase subunit 4 isoform 1, mitochondrial OS=Mus musculus GN=Cox4i1 PE=1 SV=2 - [COX41_MOUSE]	7	10	26	20	263701	1257174	255058	866598	305885	1959364		817963	265383	1.17885e+06	277310	883335	325088	1.78423e+06	289260	1.28214e+06	4.43248	1.98201	8.15414e-11	1.98923e-09	FALSE	high	P19783	Cytochrome c oxidase subunit 4 isoform 1, mitochondrial	Cytochrome c oxidase polypeptide IV; Cytochrome c oxidase subunit IV isoform 1 (COX IV-1)	COX41_MOUSE	P19783	Q545A9	Cox4i1	Cox4; Cox4a	Mus musculus (Mouse)	10090	P19783	MGI:88473	Cox4i1	MGI:88473			Acetylation; Membrane; Mitochondrion; Mitochondrion inner membrane; Transit peptide
228	Q6P5F9	Exportin-1 OS=Mus musculus GN=Xpo1 PE=1 SV=1 - [XPO1_MOUSE]	26	38	79	40	1191303	509339	1113660	679685	1021964	377951		815650	1.1989e+06	477606	1.21082e+06	692812	1.08612e+06	344169	1.16528e+06	504862	-2.30811	-1.37558	4.84428e-06	2.19037e-05	FALSE	high	Q6P5F9	Exportin-1 (Exp1)	Chromosome region maintenance 1 protein homolog	XPO1_MOUSE	Q6P5F9	na	Xpo1	Crm1	Mus musculus (Mouse)	10090	Q6P5F9	MGI:2144013	Xpo1	MGI:2144013			3D-structure; Acetylation; Cytoplasm; mRNA transport; Nucleus; Phosphoprotein; Protein transport; Repeat; RNA-binding; Transport
229	P62281	40S ribosomal protein S11 OS=Mus musculus GN=Rps11 PE=1 SV=3 - [RS11_MOUSE]	9	9	25	18	1049898	578802	1043543	708103	1041651	417689		806614	1.05659e+06	542742	1.13459e+06	721779	1.10704e+06	380355	1.09941e+06	548292	-2.00515	-1.16247	0.000102009	0.000325747	FALSE	high	P62281	40S ribosomal protein S11	na	RS11_MOUSE	P62281	P04643	Rps11	na	Mus musculus (Mouse)	10090	P62281	MGI:1351329	Rps11	MGI:1351329			Acetylation; Citrullination; Lipoprotein; Palmitate; Ribonucleoprotein; Ribosomal protein; RNA-binding; rRNA-binding
230	Q9CZM2	60S ribosomal protein L15 OS=Mus musculus GN=Rpl15 PE=2 SV=4 - [RL15_MOUSE]	7	13	34	21	869219	791864	880655	843715	885322	529369		800024	874762	742529	957486	860010	940901	482053	924383	694864	-1.33031	-0.562076	0.0572764	0.091489	FALSE	low	Q9CZM2	60S ribosomal protein L15	na	RL15_MOUSE	Q9CZM2	Q9CWI5	Rpl15	na	Mus musculus (Mouse)	10090	Q9CZM2	MGI:1913730	Rpl15	MGI:1913730			Phosphoprotein; Ribonucleoprotein; Ribosomal protein
231	Q61595	Kinectin OS=Mus musculus GN=Ktn1 PE=2 SV=1 - [KTN1_MOUSE]	35	68	99	38	645724	719700	568301	810459	605480	1449401		799844	649842	674861	617882	826111	643491	1.31985e+06	637071	940275	1.47593	0.392238	0.189219	0.258788	FALSE	no	Q61595	Kinectin	na	KTN1_MOUSE	Q61595	Q8BG49; Q8BHF4; Q8BHM8; Q8C9Y5; Q8CG51; Q8CG52; Q8CG53; Q8CG54; Q8CG55; Q8CG56; Q8CG57; Q8CG58; Q8CG59; Q8CG60; Q8CG61; Q8CG62; Q8CG63	Ktn1	na	Mus musculus (Mouse)	10090	Q61595	MGI:109153	Ktn1	MGI:109153			Alternative splicing; Coiled coil; Endoplasmic reticulum; Glycoprotein; Isopeptide bond; Membrane; Phosphoprotein; Signal-anchor; Transmembrane; Transmembrane helix; Ubl conjugation
232	Q64514	Tripeptidyl-peptidase 2 OS=Mus musculus GN=Tpp2 PE=1 SV=3 - [TPP2_MOUSE]	37	50	89	47	1127168	470958	1024724	812249	890967	461882		797991	1.13436e+06	441616	1.11412e+06	827936	946900	420598	1.06513e+06	563384	-1.89059	-1.09868	0.000265397	0.000758621	FALSE	high	Q64514	Tripeptidyl-peptidase 2 (TPP-2)	Tripeptidyl aminopeptidase; Tripeptidyl-peptidase II (TPP-II)	TPP2_MOUSE	Q64514	Q5D072	Tpp2	na	Mus musculus (Mouse)	10090	Q64514	MGI:102724	Tpp2	MGI:102724			Acetylation; Alternative splicing; Aminopeptidase; Cytoplasm; Hydrolase; Isopeptide bond; Nucleus; Protease; Serine protease; Ubl conjugation
233	Q99LE6	ATP-binding cassette sub-family F member 2 OS=Mus musculus GN=Abcf2 PE=2 SV=1 - [ABCF2_MOUSE]	17	27	47	26	664786	1349255	690581	705718	716758	647818		795819	669025	1.26519e+06	750830	719347	761755	589915	727203	858152	1.18007	0.0502628	0.866103	0.902509	FALSE	no	Q99LE6	ATP-binding cassette sub-family F member 2	na	ABCF2_MOUSE	Q99LE6	Q3UA24; Q8C1S5; Q9JL48	Abcf2	na	Mus musculus (Mouse)	10090	Q99LE6	MGI:1351657	Abcf2	MGI:1351657			Acetylation; ATP-binding; Nucleotide-binding; Repeat
234	Q8K2B3	Succinate dehydrogenase [ubiquinone] flavoprotein subunit, mitochondrial OS=Mus musculus GN=Sdha PE=1 SV=1 - [SDHA_MOUSE]	21	35	66	31	446606	1184016	330617	756219	296167	1754284		794652	449454	1.11025e+06	359461	770824	314760	1.59748e+06	374558	1.15952e+06	3.0957	1.46656	1.79792e-06	9.24516e-06	FALSE	high	Q8K2B3	Succinate dehydrogenase [ubiquinone] flavoprotein subunit, mitochondrial	Flavoprotein subunit of complex II (Fp)	SDHA_MOUSE	Q8K2B3	Q0QF19; Q3UH25; Q3UKP7; Q3V4B1; Q921P5; Q9Z1Z4	Sdha	na	Mus musculus (Mouse)	10090	Q8K2B3	MGI:1914195	Sdha	MGI:1914195			Acetylation; Electron transport; FAD; Flavoprotein; Membrane; Mitochondrion; Mitochondrion inner membrane; Oxidoreductase; Phosphoprotein; Transit peptide; Transport; Tricarboxylic acid cycle; Tumor suppressor
235	Q8BMD8	Calcium-binding mitochondrial carrier protein SCaMC-1 OS=Mus musculus GN=Slc25a24 PE=1 SV=1 - [SCMC1_MOUSE]	16	19	42	20	326861	1288859	322359	778881	313902	1727910		793129	328945	1.20856e+06	350483	793923	333608	1.57347e+06	337679	1.19198e+06	3.52994	1.65418	5.44359e-08	4.77851e-07	FALSE	high	Q8BMD8	Calcium-binding mitochondrial carrier protein SCaMC-1	Small calcium-binding mitochondrial carrier protein 1; Solute carrier family 25 member 24	SCMC1_MOUSE	Q8BMD8	Q3TCQ2; Q3THY3; Q7TPC2	Slc25a24	Scamc1	Mus musculus (Mouse)	10090	Q8BMD8	MGI:1917160	Slc25a24	MGI:1917160			Acetylation; Calcium; Membrane; Metal-binding; Mitochondrion; Mitochondrion inner membrane; Repeat; Transmembrane; Transmembrane helix; Transport
236	P63001	Ras-related C3 botulinum toxin substrate 1 OS=Mus musculus GN=Rac1 PE=1 SV=1 - [RAC1_MOUSE]	6	7	17	15	797298	584771	796258	1304044	726346	540092		791468	802382	548339	865726	1.32923e+06	771944	491818	813351	789795	-1.02983	-0.310646	0.305882	0.387759	FALSE	no	P63001	Ras-related C3 botulinum toxin substrate 1	p21-Rac1	RAC1_MOUSE	P63001	O95501; P15154; Q9BTB4	Rac1	na	Mus musculus (Mouse)	10090	P63001	MGI:97845	Rac1	MGI:97845			Cell membrane; Cytoplasm; GTP-binding; Isopeptide bond; Lipoprotein; Membrane; Methylation; Nucleotide-binding; Prenylation; Ubl conjugation
237	Q9ERU9	E3 SUMO-protein ligase RanBP2 OS=Mus musculus GN=Ranbp2 PE=1 SV=2 - [RBP2_MOUSE]	60	112	152	49	718870	925876	713440	752613	722665	902819		789380	723454	868192	775683	767148	768032	822124	755723	819155	1.08394	0.00450872	0.987654	0.991988	FALSE	no	Q9ERU9	E3 SUMO-protein ligase RanBP2	Ran-binding protein 2 (RanBP2)	RBP2_MOUSE	Q9ERU9	E9QM01; Q61992; Q8C9K9	Ranbp2	na	Mus musculus (Mouse)	10090	Q9ERU9	MGI:894323	Ranbp2	MGI:894323			Acetylation; Disulfide bond; Isopeptide bond; Ligase; Membrane; Metal-binding; mRNA transport; Nuclear pore complex; Nucleus; Phosphoprotein; Protein transport; Repeat; RNA-binding; TPR repeat; Translocation; Transport; Ubl conjugation; Ubl conjugation pathway; Zinc; Zinc-finger
238	Q6NS46	Protein RRP5 homolog OS=Mus musculus GN=Pdcd11 PE=2 SV=2 - [RRP5_MOUSE]	43	78	116	39	791085	508880	773572	1242752	662809	725474		784095	796129	477176	841061	1.26675e+06	704419	660630	780536	801520	1.02688	-0.189391	0.532204	0.613329	FALSE	no	Q6NS46	Protein RRP5 homolog	Apoptosis-linked gene 4 protein; Programmed cell death protein 11	RRP5_MOUSE	Q6NS46	Q3TSU4; Q3UGG2; Q3URK0; Q6PIA8; Q6ZQH2; Q7TPE2; Q9CTD8; Q9R1Z2; Q9WTU7	Pdcd11	Alg4; Kiaa0185	Mus musculus (Mouse)	10090	Q6NS46	MGI:1341788	Pdcd11	MGI:1341788			Acetylation; Nucleus; Phosphoprotein; Repeat; rRNA processing
239	P35486	Pyruvate dehydrogenase E1 component subunit alpha, somatic form, mitochondrial OS=Mus musculus GN=Pdha1 PE=1 SV=1 - [ODPA_MOUSE]	19	25	48	28	288708	1223297	282825	815394	332730	1760744		783950	290549	1.14708e+06	307500	831142	353618	1.60337e+06	317222	1.19386e+06	3.76349	1.75484	6.48337e-09	8.04859e-08	FALSE	high	P35486	Pyruvate dehydrogenase E1 component subunit alpha, somatic form, mitochondrial	PDHE1-A type I	ODPA_MOUSE	P35486	na	Pdha1	Pdha-1	Mus musculus (Mouse)	10090	P35486	MGI:97532	Pdha1	MGI:97532			Acetylation; Carbohydrate metabolism; Glucose metabolism; Mitochondrion; Oxidoreductase; Phosphoprotein; Pyruvate; Thiamine pyrophosphate; Transit peptide; Tricarboxylic acid cycle
240	Q68FL6	Methionine--tRNA ligase, cytoplasmic OS=Mus musculus GN=Mars PE=2 SV=1 - [SYMC_MOUSE]	22	48	75	23	867358	1012930	716796	711508	834659	555862		783186	872889	949823	779332	725249	887057	506178	846426	727083	-1.16414	-0.373292	0.205968	0.27798	FALSE	no	Q68FL6	Methionine--tRNA ligase, cytoplasmic	Methionyl-tRNA synthetase (MetRS)	SYMC_MOUSE	Q68FL6	na	Mars	na	Mus musculus (Mouse)	10090	Q68FL6	MGI:1345633	Mars	MGI:1345633			Aminoacyl-tRNA synthetase; ATP-binding; Cytoplasm; Ligase; Nucleotide-binding; Protein biosynthesis; RNA-binding; tRNA-binding
241	Q61171	Peroxiredoxin-2 OS=Mus musculus GN=Prdx2 PE=1 SV=3 - [PRDX2_MOUSE]	7	7	20	16	1223031	291194	1157511	570648	1252174	186802		780227	1.23083e+06	273052	1.2585e+06	581669	1.33078e+06	170105	1.27337e+06	341609	-3.72757	-2.20203	1.11556e-11	3.44184e-10	FALSE	high	Q61171	Peroxiredoxin-2	Thiol-specific antioxidant protein (TSA); Thioredoxin peroxidase 1; Thioredoxin-dependent peroxide reductase 1	PRDX2_MOUSE	Q61171	O88376; Q60796; Q9CWJ4; Q9DB49	Prdx2	Tdpx1; Tpx	Mus musculus (Mouse)	10090	Q61171	MGI:109486	Prdx2	MGI:109486			Acetylation; Antioxidant; Cytoplasm; Disulfide bond; Oxidoreductase; Peroxidase; Redox-active center
242	P37040	NADPH--cytochrome P450 reductase OS=Mus musculus GN=Por PE=1 SV=2 - [NCPR_MOUSE]	18	27	62	31	402587	1235541	336697	826728	366723	1504780		778843	405154	1.15856e+06	366072	842695	389745	1.37028e+06	386990	1.12385e+06	2.90407	1.39978	2.77572e-06	1.35745e-05	FALSE	high	P37040	NADPH--cytochrome P450 reductase (CPR; P450R)	na	NCPR_MOUSE	P37040	na	Por	na	Mus musculus (Mouse)	10090	P37040	MGI:97744	Por	MGI:97744			Acetylation; Endoplasmic reticulum; FAD; Flavoprotein; FMN; Membrane; NADP; Oxidoreductase
243	Q8K0D5	Elongation factor G, mitochondrial OS=Mus musculus GN=Gfm1 PE=2 SV=1 - [EFGM_MOUSE]	21	31	49	32	383355	1062047	374828	930899	369893	1539788		776802	385799	995880	407529	948877	393114	1.40216e+06	395481	1.11564e+06	2.82097	1.36262	5.17848e-06	2.32394e-05	FALSE	high	Q8K0D5	Elongation factor G, mitochondrial (EF-Gmt)	Elongation factor G 1, mitochondrial (mEF-G 1); Elongation factor G1	EFGM_MOUSE	Q8K0D5	Q921D6; Q924I0	Gfm1	Efg; Efg1; Gfm	Mus musculus (Mouse)	10090	Q8K0D5	MGI:107339	Gfm1	MGI:107339			Acetylation; Elongation factor; GTP-binding; Mitochondrion; Nucleotide-binding; Protein biosynthesis; Transit peptide
244	P54775	26S protease regulatory subunit 6B OS=Mus musculus GN=Psmc4 PE=1 SV=2 - [PRS6B_MOUSE]	18	19	49	32	752205	876343	740799	760664	826152	674214		771730	757001	821745	805429	775355	878016	613952	813482	737017	-1.10375	-0.261217	0.372236	0.456613	FALSE	no	P54775	26S protease regulatory subunit 6B	26S proteasome AAA-ATPase subunit RPT3; CIP21; MB67-interacting protein; MIP224; Proteasome 26S subunit ATPase 4; Tat-binding protein 7 (TBP-7)	PRS6B_MOUSE	P54775	Q6ZWN9	Psmc4	Tbp7	Mus musculus (Mouse)	10090	P54775	MGI:1346093	Psmc4	MGI:1346093			3D-structure; Acetylation; ATP-binding; Cytoplasm; Nucleotide-binding; Nucleus; Phosphoprotein; Proteasome
245	Q64737	Trifunctional purine biosynthetic protein adenosine-3 OS=Mus musculus GN=Gart PE=2 SV=3 - [PUR2_MOUSE]	31	46	97	42	1005742	856943	909859	561240	912614	378833		770872	1.01216e+06	803554	989238	572079	969906	344972	990433	573535	-1.72689	-0.980847	0.00103523	0.00260266	FALSE	high	Q64737	Phosphoribosylglycinamide formyltransferase	Glycinamide ribonucleotide synthetase (GARS); Phosphoribosylglycinamide synthetase; AIR synthase (AIRS); Phosphoribosyl-aminoimidazole synthetase; 5'-phosphoribosylglycinamide transformylase; GAR transformylase (GART)	PUR2_MOUSE	Q64737	Q3TGI3; Q6NS48	Gart	na	Mus musculus (Mouse)	10090	Q64737	MGI:95654	Gart	MGI:95654			Acetylation; Alternative splicing; ATP-binding; Ligase; Manganese; Metal-binding; Multifunctional enzyme; Nucleotide-binding; Purine biosynthesis; Transferase
246	Q9Z1Q5	Chloride intracellular channel protein 1 OS=Mus musculus GN=Clic1 PE=1 SV=3 - [CLIC1_MOUSE]	9	11	30	21	935916	1030668	742063	740635	726968	445296		770258	941884	966456	806803	754939	772606	405495	840431	708963	-1.18544	-0.438673	0.138417	0.198225	FALSE	no	Q9Z1Q5	Chloride intracellular channel protein 1	Nuclear chloride ion channel 27 (NCC27)	CLIC1_MOUSE	Q9Z1Q5	na	Clic1	na	Mus musculus (Mouse)	10090	Q9Z1Q5	MGI:2148924	Clic1	MGI:2148924			Acetylation; Cell membrane; Chloride; Chloride channel; Cytoplasm; Disulfide bond; Ion channel; Ion transport; Membrane; Nucleus; Phosphoprotein; Transmembrane; Transmembrane helix; Transport; Voltage-gated channel
247	Q61656	Probable ATP-dependent RNA helicase DDX5 OS=Mus musculus GN=Ddx5 PE=1 SV=2 - [DDX5_MOUSE]	16	39	81	26	999316	598452	1006809	506967	997895	499682		768187	1.00569e+06	561167	1.09465e+06	516758	1.06054e+06	455020	1.05363e+06	510982	-2.06196	-1.15906	8.67532e-05	0.000283061	FALSE	high	Q61656	Probable ATP-dependent RNA helicase DDX5	DEAD box RNA helicase DEAD1 (mDEAD1); DEAD box protein 5; RNA helicase p68	DDX5_MOUSE	Q61656	E9Q105	Ddx5	Tnz2	Mus musculus (Mouse)	10090	Q61656	MGI:105037	Ddx5	MGI:105037			Acetylation; ATP-binding; Biological rhythms; Helicase; Hydrolase; Isopeptide bond; Methylation; mRNA processing; mRNA splicing; Nucleotide-binding; Nucleus; Phosphoprotein; RNA-binding; Spliceosome; Transcription; Transcription regulation; Ubl conjugation
248	O54962	Barrier-to-autointegration factor OS=Mus musculus GN=Banf1 PE=1 SV=1 - [BAF_MOUSE]	3	5	57	31	395308	1114149	309123	626805	348942	1812771		767850	397829	1.04474e+06	336092	638910	370848	1.65074e+06	368256	1.11146e+06	3.01818	1.37739	6.08266e-06	2.65863e-05	FALSE	high	O54962	Barrier-to-autointegration factor, N-terminally processed	Breakpoint cluster region protein 1; LAP2-binding protein 1	BAF_MOUSE	O54962	Q542E6	Banf1	Baf; Bcrp1; L2bp1	Mus musculus (Mouse)	10090	O54962	MGI:1346330	Banf1	MGI:1346330			Acetylation; Chromosome; Cytoplasm; DNA-binding; Nucleus; Phosphoprotein
249	Q00612	Glucose-6-phosphate 1-dehydrogenase X OS=Mus musculus GN=G6pdx PE=1 SV=3 - [G6PD1_MOUSE]	18	29	50	25	1034386	483469	949647	810111	895453	403075		762690	1.04098e+06	453348	1.0325e+06	825757	951668	367048	1.00838e+06	548717	-1.83771	-1.0793	0.00035133	0.000975631	FALSE	high	Q00612	Glucose-6-phosphate 1-dehydrogenase X (G6PD)	na	G6PD1_MOUSE	Q00612	na	G6pdx	G6pd; G6pd-1	Mus musculus (Mouse)	10090	Q00612	MGI:105979	G6pdx	MGI:105979			Acetylation; Carbohydrate metabolism; Glucose metabolism; NADP; Oxidoreductase; Phosphoprotein
250	Q61553	Fascin OS=Mus musculus GN=Fscn1 PE=1 SV=4 - [FSCN1_MOUSE]	17	26	55	24	1042128	576862	928882	660550	974317	384070		761135	1.04877e+06	540922	1.00992e+06	673307	1.03548e+06	349741	1.03139e+06	521324	-1.97841	-1.14633	0.000130743	0.000405767	FALSE	high	Q61553	Fascin	Singed-like protein	FSCN1_MOUSE	Q61553	O09099; O09156; Q05DK3; Q7TN32; Q80V75	Fscn1	Fan1; Snl	Mus musculus (Mouse)	10090	Q61553	MGI:1352745	Fscn1	MGI:1352745			Acetylation; Actin-binding; Cell junction; Cell projection; Cytoplasm; Cytoskeleton; Phosphoprotein
251	P08207	Protein S100-A10 OS=Mus musculus GN=S100a10 PE=1 SV=2 - [S10AA_MOUSE]	4	6	19	12	513678	1046904	546793	1476971	633647	344676		760445	516954	981680	594497	1.5055e+06	673426	313868	594959	933681	1.56932	0.301211	0.417614	0.502527	FALSE	no	P08207	Protein S100-A10	Calpactin I light chain; Calpactin-1 light chain; Cellular ligand of annexin II; S100 calcium-binding protein A10; p10 protein; p11	S10AA_MOUSE	P08207	na	S100a10	Cal1l	Mus musculus (Mouse)	10090	P08207	MGI:1339468	S100a10	MGI:1339468			Acetylation; Repeat
252	Q9R0X4	Acyl-coenzyme A thioesterase 9, mitochondrial OS=Mus musculus GN=Acot9 PE=1 SV=1 - [ACOT9_MOUSE]	18	28	67	40	368779	1025560	287849	974979	313135	1591075		760230	371131	961666	312962	993809	332793	1.44886e+06	338962	1.13478e+06	3.34781	1.6103	1.01444e-07	8.13879e-07	FALSE	high	Q9R0X4	Acyl-coenzyme A thioesterase 9, mitochondrial (Acyl-CoA thioesterase 9)	Acyl coenzyme A thioester hydrolase 2 (MTE-2); Acyl-CoA thioester hydrolase 9; Mitochondrial 48 kDa acyl-CoA thioester hydrolase 1 (Mt-ACT48.1); Protein U8; p48	ACOT9_MOUSE	Q9R0X4	Q545G7; Q9WTJ0; Q9WUZ8	Acot9	Acate2	Mus musculus (Mouse)	10090	Q9R0X4	MGI:1928939	Acot9	MGI:1928939			Acetylation; Hydrolase; Mitochondrion; Serine esterase; Transit peptide
253	P70698	CTP synthase 1 OS=Mus musculus GN=Ctps1 PE=1 SV=2 - [PYRG1_MOUSE]	20	27	57	29	743119	1422323	650647	583634	655496	506090		760218	747858	1.33371e+06	707412	594906	696647	460855	717305	796490	1.11039	-0.11732	0.695327	0.756952	FALSE	no	P70698	CTP synthase 1	CTP synthetase 1; UTP--ammonia ligase 1	PYRG1_MOUSE	P70698	Q922Y4	Ctps1	Ctps	Mus musculus (Mouse)	10090	P70698	MGI:1858304	Ctps	MGI:1858304			Acetylation; ATP-binding; Glutamine amidotransferase; Immunity; Ligase; Nucleotide-binding; Phosphoprotein; Pyrimidine biosynthesis
254	Q8BJ71	Nuclear pore complex protein Nup93 OS=Mus musculus GN=Nup93 PE=2 SV=1 - [NUP93_MOUSE]	27	40	64	35	683644	865833	596837	730567	533103	1136782		757794	688003	811890	648907	744676	566570	1.03518e+06	634494	863914	1.36158	0.323882	0.272768	0.353797	FALSE	no	Q8BJ71	Nuclear pore complex protein Nup93	93 kDa nucleoporin; CBP-interacting protein 4; Nucleoporin Nup93	NUP93_MOUSE	Q8BJ71	Q3TED9; Q8BIK7; Q8K1R4; Q8R592	Nup93	Cip4; Kiaa0095	Mus musculus (Mouse)	10090	Q8BJ71	MGI:1919055	Nup93	MGI:1919055			Alternative splicing; Membrane; mRNA transport; Nuclear pore complex; Nucleus; Phosphoprotein; Protein transport; Translocation; Transport
255	Q99P88	Nuclear pore complex protein Nup155 OS=Mus musculus GN=Nup155 PE=1 SV=1 - [NU155_MOUSE]	35	47	96	46	589324	1009866	560541	694588	566185	1123072		757263	593082	946950	609445	708003	601729	1.02269e+06	601418	892547	1.48407	0.441547	0.132091	0.190531	FALSE	no	Q99P88	Nuclear pore complex protein Nup155	155 kDa nucleoporin; Nucleoporin Nup155	NU155_MOUSE	Q99P88	na	Nup155	na	Mus musculus (Mouse)	10090	Q99P88	MGI:2181182	Nup155	MGI:2181182			Disulfide bond; Glycoprotein; Membrane; mRNA transport; Nuclear pore complex; Nucleus; Phosphoprotein; Protein transport; Translocation; Transport
256	P52293	Importin subunit alpha-1 OS=Mus musculus GN=Kpna2 PE=1 SV=2 - [IMA1_MOUSE]	20	25	62	39	639522	978234	766901	611951	699062	840684		756059	643600	917288	833808	623770	742948	765543	740119	768867	1.03884	-0.0649756	0.825125	0.868596	FALSE	no	P52293	Importin subunit alpha-1	Importin alpha P1; Karyopherin subunit alpha-2; Pendulin; Pore targeting complex 58 kDa subunit (PTAC58); RAG cohort protein 1; SRP1-alpha	IMA1_MOUSE	P52293	Q64292	Kpna2	Rch1	Mus musculus (Mouse)	10090	P52293	MGI:103561	Kpna2	MGI:103561			3D-structure; Acetylation; Cytoplasm; Nucleus; Phosphoprotein; Protein transport; Repeat; Transport
257	P17225	Polypyrimidine tract-binding protein 1 OS=Mus musculus GN=Ptbp1 PE=1 SV=2 - [PTBP1_MOUSE]	11	15	74	32	998369	797635	929083	373355	772338	657505		754714	1.00474e+06	747941	1.01014e+06	380566	820824	598736	945233	575748	-1.64175	-0.871765	0.0035212	0.00775182	FALSE	high	P17225	Polypyrimidine tract-binding protein 1 (PTB)	Heterogeneous nuclear ribonucleoprotein I (hnRNP I)	PTBP1_MOUSE	P17225	na	Ptbp1	Ptb	Mus musculus (Mouse)	10090	P17225	MGI:97791	Ptbp1	MGI:97791			Acetylation; Activator; mRNA processing; mRNA splicing; Nucleus; Phosphoprotein; Repeat; Repressor; RNA-binding
258	P63325	40S ribosomal protein S10 OS=Mus musculus GN=Rps10 PE=1 SV=1 - [RS10_MOUSE]	10	15	36	23	1251908	419982	1147960	529883	882333	283991		752676	1.25989e+06	393816	1.24811e+06	540117	937724	258608	1.14858e+06	397513	-2.8894	-1.69287	2.05763e-08	2.12133e-07	FALSE	high	P63325	40S ribosomal protein S10	na	RS10_MOUSE	P63325	P09900; Q9DCR5	Rps10	na	Mus musculus (Mouse)	10090	P63325	MGI:1914347	Rps10	MGI:1914347			Cytoplasm; Methylation; Nucleus; Phosphoprotein; Ribonucleoprotein; Ribosomal protein
259	Q9D8W5	26S proteasome non-ATPase regulatory subunit 12 OS=Mus musculus GN=Psmd12 PE=1 SV=4 - [PSD12_MOUSE]	18	33	57	29	676933	1008009	633330	798334	526335	863537		751080	681250	945208	688584	813752	559377	786353	643070	848438	1.31935	0.290942	0.318505	0.400493	FALSE	no	Q9D8W5	26S proteasome non-ATPase regulatory subunit 12	26S proteasome regulatory subunit RPN5; 26S proteasome regulatory subunit p55	PSD12_MOUSE	Q9D8W5	Q9CQT4; Q9CYB3	Psmd12	na	Mus musculus (Mouse)	10090	Q9D8W5	MGI:1914247	Psmd12	MGI:1914247			Acetylation; Proteasome
260	Q920B9	FACT complex subunit SPT16 OS=Mus musculus GN=Supt16h PE=1 SV=2 - [SP16H_MOUSE]	33	55	93	42	553426	636565	563997	668762	555326	1508694		747795	556955	596906	613202	681678	590188	1.37385e+06	586782	884143	1.50677	0.375252	0.213138	0.286459	FALSE	no	Q920B9	FACT complex subunit SPT16	Chromatin-specific transcription elongation factor 140 kDa subunit; FACT 140 kDa subunit; FACTp140; Facilitates chromatin transcription complex subunit SPT16	SP16H_MOUSE	Q920B9	Q3TZ48; Q3UFH0; Q921H4	Supt16h	Fact140; Factp140; Supt16	Mus musculus (Mouse)	10090	Q920B9	MGI:1890948	Supt16	MGI:1890948			Acetylation; ADP-ribosylation; Chromosome; Coiled coil; DNA damage; DNA repair; DNA replication; Nucleus; Phosphoprotein; Transcription; Transcription regulation
261	Q1HFZ0	tRNA (cytosine(34)-C(5))-methyltransferase OS=Mus musculus GN=Nsun2 PE=1 SV=2 - [NSUN2_MOUSE]	24	34	59	35	1001567	707870	896093	426378	984973	464304		746864	1.00795e+06	663768	974271	434613	1.04681e+06	422804	1.00968e+06	507062	-1.99123	-1.1359	0.00012615	0.000392967	FALSE	high	Q1HFZ0	tRNA (cytosine(34)-C(5))-methyltransferase	Myc-induced SUN domain-containing protein (Misu); NOL1/NOP2/Sun domain family member 2	NSUN2_MOUSE	Q1HFZ0	A0PJD6; Q3U972; Q8BPG9; Q8CDF9; Q91YX9	Nsun2	D13Wsu123e; Misu	Mus musculus (Mouse)	10090	Q1HFZ0	MGI:107252	Nsun2	MGI:107252			Acetylation; Alternative splicing; Cell cycle; Cell division; Cytoplasm; Cytoskeleton; Methyltransferase; Mitosis; Nucleus; Phosphoprotein; RNA-binding; S-adenosyl-L-methionine; Transferase; tRNA processing; tRNA-binding
262	Q6GQT9	Nodal modulator 1 OS=Mus musculus GN=Nomo1 PE=1 SV=1 - [NOMO1_MOUSE]	26	38	61	37	309804	1246655	281122	782940	297651	1546008		744030	311779	1.16899e+06	305648	798061	316337	1.40782e+06	311255	1.12496e+06	3.61426	1.70428	1.64163e-08	1.75722e-07	FALSE	high	Q6GQT9	Nodal modulator 1	na	NOMO1_MOUSE	Q6GQT9	Q3TKZ1; Q8BJM1; Q8BJM8; Q8BLS9; Q8K074; Q8R1I7	Nomo1	na	Mus musculus (Mouse)	10090	Q6GQT9	MGI:2385850	Nomo1	MGI:2385850			Coiled coil; Glycoprotein; Membrane; Phosphoprotein; Signal; Transmembrane; Transmembrane helix
263	P62245	40S ribosomal protein S15a OS=Mus musculus GN=Rps15a PE=1 SV=2 - [RS15A_MOUSE]	8	11	37	22	903665	615678	914021	725942	828228	473105		743440	909427	577320	993763	739962	880222	430818	927804	582700	-1.59225	-0.814794	0.00572591	0.0118413	FALSE	med	P62245	40S ribosomal protein S15a	na	RS15A_MOUSE	P62245	P39027; P39031; Q8C023; Q9BV24	Rps15a	na	Mus musculus (Mouse)	10090	P62245	MGI:2389091	Rps15a	MGI:2389091			Ribonucleoprotein; Ribosomal protein
264	O88986	2-amino-3-ketobutyrate coenzyme A ligase, mitochondrial OS=Mus musculus GN=Gcat PE=1 SV=2 - [KBL_MOUSE]	19	21	88	44	348762	1069919	275761	732207	343171	1684856		742446	350986	1.00326e+06	299819	746348	364715	1.53426e+06	338507	1.09462e+06	3.23368	1.52264	4.23132e-07	2.7065e-06	FALSE	high	O88986	2-amino-3-ketobutyrate coenzyme A ligase, mitochondrial (AKB ligase)	Aminoacetone synthase; Glycine acetyltransferase	KBL_MOUSE	O88986	na	Gcat	Kbl	Mus musculus (Mouse)	10090	O88986	MGI:1349389	Gcat	MGI:1349389			Acetylation; Acyltransferase; Mitochondrion; Nucleus; Pyridoxal phosphate; Transferase; Transit peptide
265	P14733	Lamin-B1 OS=Mus musculus GN=Lmnb1 PE=1 SV=3 - [LMNB1_MOUSE]	17	37	55	27	751844	598978	681041	618483	743313	1051277		740823	756638	561661	740457	630428	789977	957313	762357	716467	-1.06405	-0.239279	0.417861	0.50268	FALSE	no	P14733	Lamin-B1	na	LMNB1_MOUSE	P14733	Q61791	Lmnb1	na	Mus musculus (Mouse)	10090	P14733	MGI:96795	Lmnb1	MGI:96795			Acetylation; Coiled coil; Disulfide bond; Intermediate filament; Lipoprotein; Membrane; Methylation; Nucleus; Phosphoprotein; Prenylation
266	O35887	Calumenin OS=Mus musculus GN=Calu PE=1 SV=1 - [CALU_MOUSE]	16	18	42	24	517896	1109105	463487	540264	543669	1266545		740161	521198	1.04001e+06	503923	550698	577799	1.15334e+06	534307	914681	1.7119	0.597986	0.0436212	0.0721822	FALSE	low	O35887	Calumenin	Crocalbin	CALU_MOUSE	O35887	na	Calu	na	Mus musculus (Mouse)	10090	O35887	MGI:1097158	Calu	MGI:1097158			Acetylation; Calcium; Endoplasmic reticulum; Glycoprotein; Metal-binding; Phosphoprotein; Repeat; Sarcoplasmic reticulum; Secreted; Signal
267	Q9QYJ0	DnaJ homolog subfamily A member 2 OS=Mus musculus GN=Dnaja2 PE=1 SV=1 - [DNJA2_MOUSE]	13	22	55	29	576186	1079660	544138	806017	497519	932267		739298	579860	1.0124e+06	591610	821584	528752	848940	566741	894306	1.57798	0.543014	0.0629668	0.0994387	FALSE	low	Q9QYJ0	DnaJ homolog subfamily A member 2	mDj3	DNJA2_MOUSE	Q9QYJ0	na	Dnaja2	na	Mus musculus (Mouse)	10090	Q9QYJ0	MGI:1931882	Dnaja2	MGI:1931882			Acetylation; Chaperone; Lipoprotein; Membrane; Metal-binding; Methylation; Phosphoprotein; Prenylation; Repeat; Zinc; Zinc-finger
268	Q9DBG6	Dolichyl-diphosphooligosaccharide--protein glycosyltransferase subunit 2 OS=Mus musculus GN=Rpn2 PE=2 SV=1 - [RPN2_MOUSE]	20	24	55	31	360949	1241234	255156	877053	269556	1422579		737754	363251	1.1639e+06	277417	893991	286478	1.29543e+06	309048	1.11777e+06	3.61682	1.73724	8.36158e-09	1.00531e-07	FALSE	high	Q9DBG6	Dolichyl-diphosphooligosaccharide--protein glycosyltransferase subunit 2	Dolichyl-diphosphooligosaccharide--protein glycosyltransferase 63 kDa subunit; Ribophorin II (RPN-II); Ribophorin-2	RPN2_MOUSE	Q9DBG6	A2ACG6; Q3TKY0; Q91XH0	Rpn2	na	Mus musculus (Mouse)	10090	Q9DBG6	MGI:98085	Rpn2	MGI:98085			Endoplasmic reticulum; Glycoprotein; Glycosyltransferase; Isopeptide bond; Membrane; Signal; Transferase; Transmembrane; Transmembrane helix; Ubl conjugation
269	Q3U1J4	DNA damage-binding protein 1 OS=Mus musculus GN=Ddb1 PE=1 SV=2 - [DDB1_MOUSE]	28	35	67	35	657176	536083	846468	834250	758551	792746		737546	661367	502684	920317	850362	806171	721889	795952	691645	-1.15081	-0.333409	0.254691	0.333235	FALSE	no	Q3U1J4	DNA damage-binding protein 1	DDB p127 subunit; Damage-specific DNA-binding protein 1; UV-damaged DNA-binding factor	DDB1_MOUSE	Q3U1J4	Q3U4D0; Q3U8G3; Q3UJC4; Q99LV3; Q9QYK0; Q9WV39	Ddb1	na	Mus musculus (Mouse)	10090	Q3U1J4	MGI:1202384	Ddb1	MGI:1202384			Acetylation; Cytoplasm; DNA damage; DNA repair; DNA-binding; Nucleus; Phosphoprotein; Repeat; Ubl conjugation; Ubl conjugation pathway
270	Q9CZD3	Glycine--tRNA ligase OS=Mus musculus GN=Gars PE=1 SV=1 - [SYG_MOUSE]	19	24	53	31	1013249	555608	814447	677695	932238	431973		737535	1.01971e+06	520993	885502	690783	990762	393363	965325	535046	-1.80419	-0.998967	0.000843425	0.00216189	FALSE	high	Q9CZD3	Glycine--tRNA ligase	Diadenosine tetraphosphate synthetase (AP-4-A synthetase); Glycyl-tRNA synthetase (GlyRS)	SYG_MOUSE	Q9CZD3	Q3TMM4; Q3UK01; Q8VC67	Gars	na	Mus musculus (Mouse)	10090	Q9CZD3	MGI:2449057	Gars	MGI:2449057			Acetylation; Aminoacyl-tRNA synthetase; ATP-binding; Cytoplasm; Ligase; Mitochondrion; Nucleotide-binding; Phosphoprotein; Protein biosynthesis
271	Q9WVK4	EH domain-containing protein 1 OS=Mus musculus GN=Ehd1 PE=1 SV=1 - [EHD1_MOUSE]	25	36	70	42	760213	724517	864391	882826	709347	471628		735487	765061	679378	939803	899876	753878	429473	819581	669576	-1.22403	-0.458885	0.119119	0.17361	FALSE	no	Q9WVK4	EH domain-containing protein 1	PAST homolog 1 (mPAST1)	EHD1_MOUSE	Q9WVK4	na	Ehd1	Past1	Mus musculus (Mouse)	10090	Q9WVK4	MGI:1341878	Ehd1	MGI:1341878			Acetylation; ATP-binding; Calcium; Cell membrane; Coiled coil; Endosome; Membrane; Metal-binding; Nucleotide-binding; Phosphoprotein
272	Q921F2	TAR DNA-binding protein 43 OS=Mus musculus GN=Tardbp PE=1 SV=1 - [TADBP_MOUSE]	7	11	27	15	688269	1075352	644789	543036	581575	874616		734606	692658	1.00836e+06	701043	553524	618085	796442	670595	786107	1.17225	0.0793854	0.787475	0.837791	FALSE	no	Q921F2	TAR DNA-binding protein 43 (TDP-43)	na	TADBP_MOUSE	Q921F2	Q3U591; Q3V0E7	Tardbp	Tdp43	Mus musculus (Mouse)	10090	Q921F2	MGI:2387629	Tardbp	MGI:2387629			3D-structure; DNA-binding; mRNA processing; mRNA splicing; Nucleus; Phosphoprotein; Repeat; Repressor; RNA-binding; Transcription; Transcription regulation; Ubl conjugation
273	P16110	Galectin-3 OS=Mus musculus GN=Lgals3 PE=1 SV=3 - [LEG3_MOUSE]	8	9	38	16	1068456	552905	880703	587846	911546	387918		731562	1.07527e+06	518458	957539	599199	968771	353245	1.00053e+06	490301	-2.04064	-1.17264	8.37317e-05	0.000274483	FALSE	high	P16110	Galectin-3 (Gal-3)	35 kDa lectin; Carbohydrate-binding protein 35 (CBP 35); Galactose-specific lectin 3; IgE-binding protein; L-34 galactoside-binding lectin; Laminin-binding protein; Lectin L-29; Mac-2 antigen	LEG3_MOUSE	P16110	na	Lgals3	na	Mus musculus (Mouse)	10090	P16110	MGI:96778	Lgals3	MGI:96778			Acetylation; Cytoplasm; Differentiation; Disulfide bond; IgE-binding protein; Immunity; Innate immunity; Lectin; mRNA processing; mRNA splicing; Nucleus; Phosphoprotein; Repeat; Secreted; Spliceosome
274	O09131	Glutathione S-transferase omega-1 OS=Mus musculus GN=Gsto1 PE=2 SV=2 - [GSTO1_MOUSE]	11	15	34	16	740335	1220640	576886	500477	637318	697304		728827	745056	1.14459e+06	627216	510143	677327	634978	683200	763238	1.11715	-0.0350775	0.904967	0.931153	FALSE	no	O09131	Glutathione S-transferase omega-1 (GSTO-1)	Glutathione S-transferase omega 1-1 (GSTO 1-1); Glutathione-dependent dehydroascorbate reductase; Monomethylarsonic acid reductase (MMA(V) reductase); S-(Phenacyl)glutathione reductase (SPG-R); p28	GSTO1_MOUSE	O09131	Q3TH87	Gsto1	Gstx; Gtsttl	Mus musculus (Mouse)	10090	O09131	MGI:1342273	Gsto1	MGI:1342273			Acetylation; Cytoplasm; Oxidoreductase; Transferase
275	Q8CIE6	Coatomer subunit alpha OS=Mus musculus GN=Copa PE=1 SV=2 - [COPA_MOUSE]	39	58	106	49	667888	868308	624946	845208	588148	758876		725562	672147	814211	679468	861531	625071	691047	658895	788930	1.19735	0.143997	0.621047	0.693985	FALSE	no	Q8CIE6	Proxenin	Alpha-coat protein (Alpha-COP); Xenopsin-related peptide	COPA_MOUSE	Q8CIE6	E9Q075	Copa	na	Mus musculus (Mouse)	10090	Q8CIE6	MGI:1334462	Copa	MGI:1334462			Cytoplasm; Cytoplasmic vesicle; ER-Golgi transport; Golgi apparatus; Hormone; Membrane; Phosphoprotein; Protein transport; Repeat; Secreted; Transport; WD repeat
276	Q91VD9	NADH-ubiquinone oxidoreductase 75 kDa subunit, mitochondrial OS=Mus musculus GN=Ndufs1 PE=1 SV=2 - [NDUS1_MOUSE]	27	39	64	35	358175	1087892	294450	754653	309012	1537632		723636	360459	1.02011e+06	320139	769228	328411	1.4002e+06	336336	1.06318e+06	3.16106	1.50701	5.69616e-07	3.43406e-06	FALSE	high	Q91VD9	NADH-ubiquinone oxidoreductase 75 kDa subunit, mitochondrial	Complex I-75kD (CI-75kD)	NDUS1_MOUSE	Q91VD9	Q3UQ73; Q8BM16	Ndufs1	na	Mus musculus (Mouse)	10090	Q91VD9	MGI:2443241	Ndufs1	MGI:2443241			2Fe-2S; 4Fe-4S; Acetylation; Electron transport; Iron; Iron-sulfur; Membrane; Metal-binding; Mitochondrion; Mitochondrion inner membrane; NAD; Oxidoreductase; Respiratory chain; Transit peptide; Transport; Ubiquinone
277	P45376	Aldose reductase OS=Mus musculus GN=Akr1b1 PE=1 SV=3 - [ALDR_MOUSE]	12	17	34	20	1031526	391160	977912	669797	1010324	258085		723134	1.0381e+06	366790	1.06323e+06	682733	1.07375e+06	235017	1.05836e+06	428180	-2.47177	-1.55864	5.1508e-07	3.15976e-06	FALSE	high	P45376	Aldose reductase (AR)	Aldehyde reductase	ALDR_MOUSE	P45376	O70130; Q99KC9	Akr1b1	Akr1b3; Aldor1; Aldr1	Mus musculus (Mouse)	10090	P45376	MGI:1353494	Akr1b3	MGI:1353494			Acetylation; Cytoplasm; NADP; Oxidoreductase
278	Q9JJI8	60S ribosomal protein L38 OS=Mus musculus GN=Rpl38 PE=2 SV=3 - [RL38_MOUSE]	5	6	30	20	933772	557398	961658	538268	901408	444541		722841	939726	522671	1.04556e+06	548664	957996	404807	981093	492047	-1.9939	-1.11704	0.000153186	0.000466113	FALSE	high	Q9JJI8	60S ribosomal protein L38	na	RL38_MOUSE	Q9JJI8	na	Rpl38	na	Mus musculus (Mouse)	10090	Q9JJI8	MGI:1914921	Rpl38	MGI:1914921			Acetylation; Ribonucleoprotein; Ribosomal protein
279	Q8BIJ6	Isoleucine--tRNA ligase, mitochondrial OS=Mus musculus GN=Iars2 PE=1 SV=1 - [SYIM_MOUSE]	24	40	63	31	341733	1102854	278583	727961	294454	1575008		720099	343912	1.03414e+06	302888	742020	312939	1.43423e+06	319913	1.07013e+06	3.34507	1.58002	1.74664e-07	1.28577e-06	FALSE	high	Q8BIJ6	Isoleucine--tRNA ligase, mitochondrial	Isoleucyl-tRNA synthetase (IleRS)	SYIM_MOUSE	Q8BIJ6	Q3TKT8; Q8BIJ0; Q8BIP3	Iars2	na	Mus musculus (Mouse)	10090	Q8BIJ6	MGI:1919586	Iars2	MGI:1919586			Acetylation; Aminoacyl-tRNA synthetase; ATP-binding; Ligase; Mitochondrion; Nucleotide-binding; Protein biosynthesis; Transit peptide
280	Q9R1P4	Proteasome subunit alpha type-1 OS=Mus musculus GN=Psma1 PE=1 SV=1 - [PSA1_MOUSE]	10	15	38	17	806608	757574	717435	678152	657956	700939		719777	811751	710376	780027	691249	699261	638288	763680	679971	-1.12311	-0.276714	0.342451	0.425252	FALSE	no	Q9R1P4	Proteasome subunit alpha type-1	Macropain subunit C2; Multicatalytic endopeptidase complex subunit C2; Proteasome component C2; Proteasome nu chain	PSA1_MOUSE	Q9R1P4	na	Psma1	na	Mus musculus (Mouse)	10090	Q9R1P4	MGI:1347005	Psma1	MGI:1347005			3D-structure; Acetylation; Cytoplasm; Glycoprotein; Hydrolase; Immunity; Isopeptide bond; Nucleus; Phosphoprotein; Protease; Proteasome; Threonine protease; Ubl conjugation
281	P60229	Eukaryotic translation initiation factor 3 subunit E OS=Mus musculus GN=Eif3e PE=1 SV=1 - [EIF3E_MOUSE]	16	23	53	26	737488	737123	722296	644854	657073	819649		719747	742191	691199	785312	657308	698323	746388	741942	698298	-1.0625	-0.198552	0.496519	0.579042	FALSE	no	P60229	Eukaryotic translation initiation factor 3 subunit E (eIF3e)	Eukaryotic translation initiation factor 3 subunit 6; MMTV integration site 6; Mammary tumor-associated protein INT-6; Viral integration site protein INT-6; eIF-3 p48	EIF3E_MOUSE	P60229	O43902; Q64058; Q64059; Q64252	Eif3e	Eif3s6; Int6	Mus musculus (Mouse)	10090	P60229	MGI:99257	Eif3e	MGI:99257			Acetylation; Cytoplasm; Initiation factor; Nucleus; Phosphoprotein; Protein biosynthesis
282	P14685	26S proteasome non-ATPase regulatory subunit 3 OS=Mus musculus GN=Psmd3 PE=1 SV=3 - [PSMD3_MOUSE]	22	35	63	31	695388	887219	696041	702554	619094	693470		715628	699822	831944	756766	716122	657959	631487	704849	726518	1.03074	-0.0737446	0.799946	0.846978	FALSE	no	P14685	26S proteasome non-ATPase regulatory subunit 3	26S proteasome regulatory subunit RPN3; 26S proteasome regulatory subunit S3; Proteasome subunit p58; Transplantation antigen P91A; Tum-P91A antigen	PSMD3_MOUSE	P14685	Q3TP95; Q99LL7	Psmd3	P91a; Tstap91a	Mus musculus (Mouse)	10090	P14685	MGI:98858	Psmd3	MGI:98858			Proteasome; Tumor antigen
283	Q9QUR6	Prolyl endopeptidase OS=Mus musculus GN=Prep PE=2 SV=1 - [PPCE_MOUSE]	28	35	60	37	936144	613245	842179	533171	810427	556984		715358	942113	575039	915654	543468	861304	507200	906357	541902	-1.67255	-0.85354	0.00359814	0.0078922	FALSE	high	Q9QUR6	Prolyl endopeptidase (PE)	Post-proline cleaving enzyme	PPCE_MOUSE	Q9QUR6	Q80YS1	Prep	Pep	Mus musculus (Mouse)	10090	Q9QUR6	MGI:1270863	Prep	MGI:1270863			Acetylation; Cytoplasm; Hydrolase; Protease; Serine protease
284	P14131	40S ribosomal protein S16 OS=Mus musculus GN=Rps16 PE=2 SV=4 - [RS16_MOUSE]	10	12	26	16	921529	490016	942998	604363	1042242	283844		714165	927405	459487	1.02527e+06	616035	1.10767e+06	258474	1.02012e+06	444665	-2.29412	-1.39044	5.39895e-06	2.40744e-05	FALSE	high	P14131	40S ribosomal protein S16	na	RS16_MOUSE	P14131	Q3THM9	Rps16	na	Mus musculus (Mouse)	10090	P14131	MGI:98118	Rps16	MGI:98118			Acetylation; Ribonucleoprotein; Ribosomal protein
285	P62192	26S protease regulatory subunit 4 OS=Mus musculus GN=Psmc1 PE=1 SV=1 - [PRS4_MOUSE]	19	28	53	28	761071	823690	699146	641832	720215	636130		713681	765924	772373	760142	654228	765429	579272	763832	668624	-1.14239	-0.312726	0.283239	0.364828	FALSE	no	P62192	26S protease regulatory subunit 4 (P26s4)	26S proteasome AAA-ATPase subunit RPT2; Proteasome 26S subunit ATPase 1	PRS4_MOUSE	P62192	P49014; Q03527; Q96AZ3	Psmc1	na	Mus musculus (Mouse)	10090	P62192	MGI:106054	Psmc1	MGI:106054			Acetylation; ATP-binding; Cytoplasm; Isopeptide bond; Lipoprotein; Myristate; Nucleotide-binding; Nucleus; Phosphoprotein; Proteasome; Ubl conjugation
286	Q61207	Sulfated glycoprotein 1 OS=Mus musculus GN=Psap PE=1 SV=2 - [SAP_MOUSE]	15	20	37	22	397947	1603180	330780	612230	416111	919670		713320	400485	1.5033e+06	359638	624054	442234	837469	400785	988274	2.46584	1.09578	0.000248758	0.000717875	FALSE	high	Q61207	Prosaposin	Sulfated glycoprotein 1 (SGP-1)	SAP_MOUSE	Q61207	Q60861; Q64006; Q64219	Psap	Sgp1	Mus musculus (Mouse)	10090	Q61207	MGI:97783	Psap	MGI:97783			Disulfide bond; Glycoprotein; Repeat; Secreted; Signal
287	P30999	Catenin delta-1 OS=Mus musculus GN=Ctnnd1 PE=1 SV=2 - [CTND1_MOUSE]	25	42	76	33	590513	1038033	496329	993920	539126	610490		711402	594278	973362	539630	1.01312e+06	572971	555924	568960	847467	1.4895	0.415642	0.160027	0.224348	FALSE	no	P30999	Catenin delta-1	Cadherin-associated Src substrate (CAS); p120 catenin (p120(ctn)); p120(cas)	CTND1_MOUSE	P30999	Q3TSU9; Q80XQ4; Q8CHF8	Ctnnd1	Catns; Kiaa0384	Mus musculus (Mouse)	10090	P30999	MGI:105100	Ctnnd1	MGI:105100			Acetylation; Alternative splicing; Cell adhesion; Cell membrane; Coiled coil; Cytoplasm; Membrane; Nucleus; Phosphoprotein; Repeat; Transcription; Transcription regulation; Wnt signaling pathway
288	P97310	DNA replication licensing factor MCM2 OS=Mus musculus GN=Mcm2 PE=1 SV=3 - [MCM2_MOUSE]	25	41	62	28	923492	848696	841150	392712	810663	435427		708690	929381	795821	914535	400296	861555	396508	901823	530875	-1.69875	-0.956947	0.00129062	0.00316878	FALSE	high	P97310	DNA replication licensing factor MCM2	Minichromosome maintenance protein 2 homolog; Nuclear protein BM28	MCM2_MOUSE	P97310	O08971; O89057; Q8C2R0	Mcm2	Bm28; Cdcl1; Kiaa0030; Mcmd2	Mus musculus (Mouse)	10090	P97310	MGI:105380	Mcm2	MGI:105380			Acetylation; ATP-binding; Cell cycle; DNA replication; DNA-binding; Helicase; Hydrolase; Metal-binding; Nucleotide-binding; Nucleus; Phosphoprotein; Zinc; Zinc-finger
289	Q91ZW3	SWI/SNF-related matrix-associated actin-dependent regulator of chromatin subfamily A member 5 OS=Mus musculus GN=Smarca5 PE=1 SV=1 - [SMCA5_MOUSE]	32	63	91	34	659629	654356	675160	629946	663904	962444		707573	663835	613588	734063	642112	705582	876420	701160	710707	1.01362	-0.109059	0.709836	0.769991	FALSE	no	Q91ZW3	SWI/SNF-related matrix-associated actin-dependent regulator of chromatin subfamily A member 5	Sucrose nonfermenting protein 2 homolog (mSnf2h)	SMCA5_MOUSE	Q91ZW3	Q8C791; Q8CA22; Q8VDG1; Q925M9	Smarca5	Snf2h	Mus musculus (Mouse)	10090	Q91ZW3	MGI:1935129	Smarca5	MGI:1935129			Acetylation; ATP-binding; Chromatin regulator; Helicase; Hydrolase; Nucleotide-binding; Nucleus; Phosphoprotein; Repeat
290	Q8BK67	Protein RCC2 OS=Mus musculus GN=Rcc2 PE=1 SV=1 - [RCC2_MOUSE]	13	20	41	25	1020680	656190	831061	405761	959083	369471		707041	1.02719e+06	615308	903566	413597	1.01929e+06	336447	983349	455118	-2.16065	-1.26552	2.13884e-05	8.04894e-05	FALSE	high	Q8BK67	Protein RCC2	na	RCC2_MOUSE	Q8BK67	A2AWQ3; Q6ZPQ0	Rcc2	Kiaa1470	Mus musculus (Mouse)	10090	Q8BK67	MGI:1919784	Rcc2	MGI:1919784			Acetylation; Cell cycle; Cell division; Centromere; Chromosome; Cytoplasm; Cytoskeleton; Microtubule; Mitosis; Nucleus; Phosphoprotein; Repeat
291	P62196	26S protease regulatory subunit 8 OS=Mus musculus GN=Psmc5 PE=1 SV=1 - [PRS8_MOUSE]	14	26	50	27	656493	858293	615891	786573	610095	710146		706248	660679	804820	669623	801764	648395	646672	659566	751085	1.13876	0.0696222	0.811001	0.85609	FALSE	no	P62196	26S protease regulatory subunit 8	26S proteasome AAA-ATPase subunit RPT6; Proteasome 26S subunit ATPase 5; Proteasome subunit p45; p45/SUG (mSUG1)	PRS8_MOUSE	P62196	O35051; P47210; P52915; P52916; Q3UL51; Q9CWN5	Psmc5	Sug1	Mus musculus (Mouse)	10090	P62196	MGI:105047	Psmc5	MGI:105047			Acetylation; ATP-binding; Cytoplasm; Nucleotide-binding; Nucleus; Proteasome
292	P26231	Catenin alpha-1 OS=Mus musculus GN=Ctnna1 PE=1 SV=1 - [CTNA1_MOUSE]	30	47	93	42	755476	568034	668817	1168785	635030	439371		705919	760293	532644	727167	1.19136e+06	674896	400099	720785	708034	-1.01801	-0.304267	0.31969	0.401382	FALSE	no	P26231	Catenin alpha-1	102 kDa cadherin-associated protein; Alpha E-catenin; CAP102	CTNA1_MOUSE	P26231	na	Ctnna1	Catna1	Mus musculus (Mouse)	10090	P26231	MGI:88274	Ctnna1	MGI:88274			3D-structure; Acetylation; Cell adhesion; Cell junction; Cell membrane; Cytoplasm; Cytoskeleton; Membrane; Phosphoprotein; Ubl conjugation
293	Q03145	Ephrin type-A receptor 2 OS=Mus musculus GN=Epha2 PE=1 SV=3 - [EPHA2_MOUSE]	27	42	61	28	451540	998780	410065	1203039	401651	767087		705360	454419	936554	445840	1.22627e+06	426866	698524	442375	953784	2.15605	0.959796	0.00120059	0.00297207	FALSE	high	Q03145	Ephrin type-A receptor 2	Epithelial cell kinase; Tyrosine-protein kinase receptor ECK; Tyrosine-protein kinase receptor MPK-5; Tyrosine-protein kinase receptor SEK-2	EPHA2_MOUSE	Q03145	Q3UNI2; Q60633; Q62212	Epha2	Eck; Myk2; Sek2	Mus musculus (Mouse)	10090	Q03145	MGI:95278	Epha2	MGI:95278			Angiogenesis; Apoptosis; ATP-binding; Cell adhesion; Cell junction; Cell membrane; Cell projection; Differentiation; Disulfide bond; Glycoprotein; Kinase; Membrane; Nucleotide-binding; Phosphoprotein; Receptor; Repeat; Signal; Transferase; Transmembrane; Transmembrane helix; Tyrosine-protein kinase; Ubl conjugation
294	Q60854	Serpin B6 OS=Mus musculus GN=Serpinb6 PE=1 SV=1 - [SPB6_MOUSE]	15	21	56	27	1291998	321954	1141460	248071	897658	321055		703699	1.30024e+06	301896	1.24104e+06	252862	954011	292359	1.1651e+06	282372	-4.12611	-2.14725	2.18507e-12	8.17546e-11	FALSE	high	Q60854	Serpin B6	Placental thrombin inhibitor; Proteinase inhibitor 6 (PI-6)	SPB6_MOUSE	Q60854	na	Serpinb6	Serpinb6a; Spi3	Mus musculus (Mouse)	10090	Q60854	MGI:103123	Serpinb6a	MGI:103123			3D-structure; Acetylation; Cytoplasm; Protease inhibitor; Serine protease inhibitor
295	Q9Z110	Delta-1-pyrroline-5-carboxylate synthase OS=Mus musculus GN=Aldh18a1 PE=1 SV=2 - [P5CS_MOUSE]	25	31	59	36	362617	1184096	206818	674992	278762	1504225		701918	364929	1.11032e+06	224862	688028	296262	1.36978e+06	295351	1.05604e+06	3.57555	1.69774	1.8585e-08	1.93505e-07	FALSE	high	Q9Z110	Gamma-glutamyl phosphate reductase	Aldehyde dehydrogenase family 18 member A1 (GK); Gamma-glutamyl kinase (GPR); Glutamate-5-semialdehyde dehydrogenase; Glutamyl-gamma-semialdehyde dehydrogenase	P5CS_MOUSE	Q9Z110	Q8BGM2; Q9R1P6	Aldh18a1	P5cs; Pycs	Mus musculus (Mouse)	10090	Q9Z110	MGI:1888908	Aldh18a1	MGI:1888908			Alternative splicing; Amino-acid biosynthesis; ATP-binding; Kinase; Membrane; Mitochondrion; Mitochondrion inner membrane; Multifunctional enzyme; NADP; Nucleotide-binding; Oxidoreductase; Proline biosynthesis; Transferase
296	Q99LC5	Electron transfer flavoprotein subunit alpha, mitochondrial OS=Mus musculus GN=Etfa PE=1 SV=2 - [ETFA_MOUSE]	12	14	44	26	297010	997016	283669	785473	324216	1523458		701807	298904	934900	308417	800643	344570	1.38729e+06	317297	1.04094e+06	3.28066	1.56571	1.76524e-07	1.29719e-06	FALSE	high	Q99LC5	Electron transfer flavoprotein subunit alpha, mitochondrial (Alpha-ETF)	na	ETFA_MOUSE	Q99LC5	Q3THD7; Q3V000; Q4V9X5; Q8BMD3; Q8BMU7	Etfa	na	Mus musculus (Mouse)	10090	Q99LC5	MGI:106092	Etfa	MGI:106092			Acetylation; Electron transport; FAD; Flavoprotein; Mitochondrion; Transit peptide; Transport
297	P25206	DNA replication licensing factor MCM3 OS=Mus musculus GN=Mcm3 PE=1 SV=2 - [MCM3_MOUSE]	27	40	66	41	791490	774001	817405	503959	861760	461278		701649	796537	725779	888718	513692	915859	420048	867038	553173	-1.56739	-0.794154	0.00729066	0.0146022	FALSE	med	P25206	DNA replication licensing factor MCM3	DNA polymerase alpha holoenzyme-associated protein P1; P1-MCM3	MCM3_MOUSE	P25206	Q61492	Mcm3	Mcmd; Mcmd3	Mus musculus (Mouse)	10090	P25206	MGI:101845	Mcm3	MGI:101845			Acetylation; ATP-binding; Cell cycle; DNA replication; DNA-binding; Glycoprotein; Helicase; Hydrolase; Nucleotide-binding; Nucleus; Phosphoprotein
298	Q9R0Q7	Prostaglandin E synthase 3 OS=Mus musculus GN=Ptges3 PE=1 SV=1 - [TEBP_MOUSE]	7	9	32	19	869160	841199	814285	555646	718052	393469		698635	874702	788791	885326	566377	763130	358300	841053	571156	-1.47254	-0.738512	0.0123785	0.0236415	FALSE	med	Q9R0Q7	Prostaglandin E synthase 3	Cytosolic prostaglandin E2 synthase (cPGES); Hsp90 co-chaperone; Progesterone receptor complex p23; Sid 3177; Telomerase-binding protein p23	TEBP_MOUSE	Q9R0Q7	Q542V4; Q9D7V0; Q9WV83	Ptges3	Sid3177; Tebp	Mus musculus (Mouse)	10090	Q9R0Q7	MGI:1929282	Ptges3	MGI:1929282			Acetylation; Cytoplasm; Fatty acid biosynthesis; Fatty acid metabolism; Isomerase; Lipid biosynthesis; Lipid metabolism; Phosphoprotein; Prostaglandin biosynthesis; Prostaglandin metabolism
299	P62911	60S ribosomal protein L32 OS=Mus musculus GN=Rpl32 PE=1 SV=2 - [RL32_MOUSE]	11	17	44	27	851431	631051	773650	664681	777263	487611		697614	856860	591735	841146	677518	826058	444028	841355	571094	-1.47323	-0.691441	0.0186569	0.0338161	FALSE	med	P62911	60S ribosomal protein L32	na	RL32_MOUSE	P62911	P02433; Q3UFJ7	Rpl32	na	Mus musculus (Mouse)	10090	P62911	MGI:98038	Rpl32	MGI:98038			Ribonucleoprotein; Ribosomal protein
300	Q9D1D4	Transmembrane emp24 domain-containing protein 10 OS=Mus musculus GN=Tmed10 PE=2 SV=1 - [TMEDA_MOUSE]	6	9	27	15	313858	1193747	290199	717157	350498	1317274		697122	315859	1.11937e+06	315517	731007	372502	1.19953e+06	334626	1.01664e+06	3.03813	1.46456	8.89244e-07	5.05592e-06	FALSE	high	Q9D1D4	Transmembrane emp24 domain-containing protein 10	21 kDa transmembrane-trafficking protein; Transmembrane protein Tmp21; p24 family protein delta-1 (p24delta1)	TMEDA_MOUSE	Q9D1D4	Q3U7I7; Q6P227; Q922U8	Tmed10	Tmp21	Mus musculus (Mouse)	10090	Q9D1D4	MGI:1915831	Tmed10	MGI:1915831			Alternative splicing; Cell membrane; Cytoplasmic vesicle; Endoplasmic reticulum; ER-Golgi transport; Glycoprotein; Golgi apparatus; Membrane; Methylation; Protein transport; Signal; Transmembrane; Transmembrane helix; Transport
301	P70296	Phosphatidylethanolamine-binding protein 1 OS=Mus musculus GN=Pebp1 PE=1 SV=3 - [PEBP1_MOUSE]	8	9	27	22	1212364	252140	1015524	421484	1081221	194790		696254	1.22009e+06	236431	1.10412e+06	429624	1.1491e+06	177379	1.15777e+06	281145	-4.11806	-2.25781	7.52838e-13	3.25661e-11	FALSE	high	P70296	Hippocampal cholinergic neurostimulating peptide	HCNPpp (HCNP)	PEBP1_MOUSE	P70296	Q9D8G9; Q9JJ58	Pebp1	Pbp; Pebp	Mus musculus (Mouse)	10090	P70296	MGI:1344408	Pebp1	MGI:1344408			Acetylation; ATP-binding; Cytoplasm; Disulfide bond; Lipid-binding; Nucleotide-binding; Phosphoprotein; Protease inhibitor; Serine protease inhibitor
302	Q99P72	Reticulon-4 OS=Mus musculus GN=Rtn4 PE=1 SV=2 - [RTN4_MOUSE]	12	24	83	36	479178	1109827	388922	735580	414354	1048147		696001	482234	1.04068e+06	422853	749786	440366	954462	448484	914977	2.04015	0.906703	0.00200154	0.00469187	FALSE	high	Q99P72	Reticulon-4	Neurite outgrowth inhibitor (Nogo protein)	RTN4_MOUSE	Q99P72	Q5DTK9; Q7TNB7; Q80W95; Q8BGK7; Q8BGM9; Q8K290; Q8K3G8; Q9CTE3	Rtn4	Kiaa0886; Nogo	Mus musculus (Mouse)	10090	Q99P72	MGI:1915835	Rtn4	MGI:1915835			3D-structure; Acetylation; Alternative splicing; Endoplasmic reticulum; Membrane; Neurogenesis; Phosphoprotein; Transmembrane; Transmembrane helix
303	P80313	T-complex protein 1 subunit eta OS=Mus musculus GN=Cct7 PE=1 SV=1 - [TCPH_MOUSE]	22	28	73	39	829710	645285	770694	734820	692833	497782		695187	835001	605083	837932	749012	736328	453290	803087	602461	-1.33301	-0.553102	0.0594147	0.0946125	FALSE	low	P80313	T-complex protein 1 subunit eta (TCP-1-eta)	CCT-eta	TCPH_MOUSE	P80313	na	Cct7	Ccth	Mus musculus (Mouse)	10090	P80313	MGI:107184	Cct7	MGI:107184			Acetylation; ATP-binding; Chaperone; Cytoplasm; Nucleotide-binding
304	O88342	WD repeat-containing protein 1 OS=Mus musculus GN=Wdr1 PE=1 SV=3 - [WDR1_MOUSE]	21	28	50	25	887080	371948	904564	779027	926368	300855		694974	892737	348775	983481	794072	984523	273964	953580	472270	-2.01914	-1.28737	3.14152e-05	0.000113636	FALSE	high	O88342	WD repeat-containing protein 1	Actin-interacting protein 1 (AIP1)	WDR1_MOUSE	O88342	na	Wdr1	na	Mus musculus (Mouse)	10090	O88342	MGI:1337100	Wdr1	MGI:1337100			Acetylation; Actin-binding; Cell junction; Cell projection; Cytoplasm; Cytoskeleton; Phosphoprotein; Repeat; WD repeat
305	Q9WUM5	Succinyl-CoA ligase [ADP/GDP-forming] subunit alpha, mitochondrial OS=Mus musculus GN=Suclg1 PE=1 SV=4 - [SUCA_MOUSE]	11	15	37	22	382285	961068	274835	863406	226495	1458960		694508	384723	901192	298813	880081	240714	1.32856e+06	308083	1.03661e+06	3.36471	1.63683	1.0855e-07	8.61011e-07	FALSE	high	Q9WUM5	Succinyl-CoA ligase [ADP/GDP-forming] subunit alpha, mitochondrial	Succinyl-CoA synthetase subunit alpha (SCS-alpha)	SUCA_MOUSE	Q9WUM5	Q8C2C3; Q9DBA3; Q9DCI8	Suclg1	na	Mus musculus (Mouse)	10090	Q9WUM5	MGI:1927234	Suclg1	MGI:1927234			Acetylation; GTP-binding; Isopeptide bond; Ligase; Mitochondrion; Nucleotide-binding; Transit peptide; Tricarboxylic acid cycle; Ubl conjugation
306	Q8BX17	Gem-associated protein 5 OS=Mus musculus GN=Gemin5 PE=2 SV=2 - [GEMI5_MOUSE]	33	46	81	30	463757	1049747	387785	341034	435709	1472706		691790	466714	984346	421617	347620	463062	1.34107e+06	450464	891013	1.97799	0.672776	0.0313055	0.0539457	FALSE	low	Q8BX17	Gem-associated protein 5 (Gemin5)	na	GEMI5_MOUSE	Q8BX17	Q3UPH2	Gemin5	na	Mus musculus (Mouse)	10090	Q8BX17	MGI:2449311	Gemin5	MGI:2449311			Coiled coil; Cytoplasm; mRNA processing; mRNA splicing; Nucleus; Phosphoprotein; Repeat; RNA-binding; WD repeat
307	Q9DBJ1	Phosphoglycerate mutase 1 OS=Mus musculus GN=Pgam1 PE=1 SV=3 - [PGAM1_MOUSE]	10	15	52	24	1155175	267965	1047771	461110	1002046	214421		691415	1.16254e+06	251270	1.13918e+06	470015	1.06495e+06	195256	1.12223e+06	305514	-3.67324	-2.09301	1.72595e-11	5.02922e-10	FALSE	high	Q9DBJ1	Phosphoglycerate mutase 1	BPG-dependent PGAM 1; Phosphoglycerate mutase isozyme B (PGAM-B)	PGAM1_MOUSE	Q9DBJ1	Q9D6W0; Q9ERT3	Pgam1	na	Mus musculus (Mouse)	10090	Q9DBJ1	MGI:97552	Pgam1	MGI:97552			Acetylation; Glycolysis; Hydrolase; Isomerase; Phosphoprotein
308	Q6DFW4	Nucleolar protein 58 OS=Mus musculus GN=Nop58 PE=1 SV=1 - [NOP58_MOUSE]	17	28	61	31	828299	542424	811776	448545	760263	746905		689702	833581	508630	882598	457208	807991	680146	841390	548661	-1.53353	-0.74824	0.0113709	0.0218863	FALSE	med	Q6DFW4	Nucleolar protein 58	MSSP; Nucleolar protein 5; SIK-similar protein	NOP58_MOUSE	Q6DFW4	O70396; Q3UYX9; Q3UZA3; Q8C8Y7	Nop58	Nol5	Mus musculus (Mouse)	10090	Q6DFW4	MGI:1933184	Nop58	MGI:1933184			Isopeptide bond; Nucleus; Phosphoprotein; Ribonucleoprotein; Ribosome biogenesis; Ubl conjugation
309	P47963	60S ribosomal protein L13 OS=Mus musculus GN=Rpl13 PE=2 SV=3 - [RL13_MOUSE]	5	14	28	15	961623	559114	878419	535852	778598	403517		686187	967755	524280	955055	546201	827477	367450	916762	479310	-1.91267	-1.06454	0.000303349	0.000855986	FALSE	high	P47963	60S ribosomal protein L13	A52	RL13_MOUSE	P47963	Q9CRZ9; Q9DCH1	Rpl13	na	Mus musculus (Mouse)	10090	P47963	MGI:105922	Rpl13	MGI:105922			Acetylation; Phosphoprotein; Ribonucleoprotein; Ribosomal protein
310	Q91WS0	CDGSH iron-sulfur domain-containing protein 1 OS=Mus musculus GN=Cisd1 PE=1 SV=1 - [CISD1_MOUSE]	5	8	24	12	240601	1169465	233070	629416	263042	1563192		683131	242135	1.09661e+06	253404	641572	279555	1.42347e+06	258365	1.05388e+06	4.07905	1.84627	1.42154e-09	2.303e-08	FALSE	high	Q91WS0	CDGSH iron-sulfur domain-containing protein 1	MitoNEET	CISD1_MOUSE	Q91WS0	Q3V2I3; Q8WUQ5	Cisd1	D10Ertd214e; Zcd1	Mus musculus (Mouse)	10090	Q91WS0	MGI:1261855	Cisd1	MGI:1261855			2Fe-2S; Acetylation; Iron; Iron-sulfur; Membrane; Metal-binding; Mitochondrion; Mitochondrion outer membrane; Signal-anchor; Transmembrane; Transmembrane helix
311	O70435	Proteasome subunit alpha type-3 OS=Mus musculus GN=Psma3 PE=1 SV=3 - [PSA3_MOUSE]	8	13	30	17	714900	699715	713954	565619	718860	663218		679378	719459	656121	776242	576543	763989	603939	753230	612201	-1.23036	-0.410995	0.158208	0.222095	FALSE	no	O70435	Proteasome subunit alpha type-3	Macropain subunit C8; Multicatalytic endopeptidase complex subunit C8; Proteasome component C8; Proteasome subunit K	PSA3_MOUSE	O70435	na	Psma3	na	Mus musculus (Mouse)	10090	O70435	MGI:104883	Psma3	MGI:104883			3D-structure; Acetylation; Cytoplasm; Hydrolase; Nucleus; Phosphoprotein; Protease; Proteasome; Threonine protease
312	Q60605	Myosin light polypeptide 6 OS=Mus musculus GN=Myl6 PE=1 SV=3 - [MYL6_MOUSE]	5	9	18	12	725104	875570	664195	758084	737834	309944		678455	729728	821020	722142	772725	784154	282241	745341	625329	-1.19192	-0.502744	0.102935	0.152836	FALSE	no	Q60605	Myosin light polypeptide 6	17 kDa myosin light chain (LC17); Myosin light chain 3 (MLC-3); Myosin light chain alkali 3 (Myosin light chain A3); Smooth muscle and nonmuscle myosin light chain alkali 6	MYL6_MOUSE	Q60605	na	Myl6	Myln	Mus musculus (Mouse)	10090	Q60605	MGI:109318	Myl6	MGI:109318			Acetylation; Alternative splicing; Motor protein; Muscle protein; Myosin; Phosphoprotein; Repeat
313	P61514	60S ribosomal protein L37a OS=Mus musculus GN=Rpl37a PE=2 SV=2 - [RL37A_MOUSE]	5	5	22	14	785071	633449	821528	576482	802178	448571		677880	790077	593984	893201	587616	852537	408477	845272	530026	-1.59478	-0.802733	0.00631575	0.012877	FALSE	med	P61514	60S ribosomal protein L37a	na	RL37A_MOUSE	P61514	P12751	Rpl37a	na	Mus musculus (Mouse)	10090	P61514	MGI:98068	Rpl37a	MGI:98068			Metal-binding; Ribonucleoprotein; Ribosomal protein; Zinc; Zinc-finger
314	Q91W90	Thioredoxin domain-containing protein 5 OS=Mus musculus GN=Txndc5 PE=1 SV=2 - [TXND5_MOUSE]	16	22	34	21	483223	867959	462859	685087	511160	1055748		677673	486304	813884	503240	698318	543250	961384	510931	824529	1.61378	0.569009	0.0515009	0.0833068	FALSE	low	Q91W90	Thioredoxin domain-containing protein 5	Endoplasmic reticulum resident protein 46 (ER protein 46; ERp46); Plasma cell-specific thioredoxin-related protein (PC-TRP); Thioredoxin-like protein p46	TXND5_MOUSE	Q91W90	Q8R1I6	Txndc5	Tlp46	Mus musculus (Mouse)	10090	Q91W90	MGI:2145316	Txndc5	MGI:2145316			Disulfide bond; Endoplasmic reticulum; Redox-active center; Repeat; Signal
315	P46935	E3 ubiquitin-protein ligase NEDD4 OS=Mus musculus GN=Nedd4 PE=1 SV=3 - [NEDD4_MOUSE]	21	39	71	30	509510	1087505	470597	735831	468978	793519		677657	512759	1.01975e+06	511654	750042	498419	722593	507611	830796	1.63668	0.582496	0.0460424	0.0754369	FALSE	low	P46935	E3 ubiquitin-protein ligase NEDD4	Neural precursor cell expressed developmentally down-regulated protein 4 (NEDD-4)	NEDD4_MOUSE	P46935	O08758; Q3UZI2; Q8BGB3	Nedd4	Kiaa0093; Nedd-4; Nedd4-1; Nedd4a	Mus musculus (Mouse)	10090	P46935	MGI:97297	Nedd4	MGI:97297			3D-structure; Cell membrane; Cytoplasm; Ligase; Membrane; Neurogenesis; Phosphoprotein; Repeat; Ubl conjugation; Ubl conjugation pathway
316	P15532	Nucleoside diphosphate kinase A OS=Mus musculus GN=Nme1 PE=1 SV=1 - [NDKA_MOUSE]	6	12	43	18	1075024	239394	996774	532041	994652	228013		677650	1.08188e+06	224479	1.08374e+06	542316	1.05709e+06	207633	1.07424e+06	324810	-3.30728	-1.99029	2.6059e-10	5.55043e-09	FALSE	high	P15532	Nucleoside diphosphate kinase A (NDK A; NDP kinase A)	Metastasis inhibition factor NM23; NDPK-A; Tumor metastatic process-associated protein; nm23-M1	NDKA_MOUSE	P15532	na	Nme1	Nm23	Mus musculus (Mouse)	10090	P15532	MGI:97355	Nme1	MGI:97355			Acetylation; ATP-binding; Cytoplasm; Differentiation; Endocytosis; Isopeptide bond; Kinase; Magnesium; Metal-binding; Neurogenesis; Nucleotide metabolism; Nucleotide-binding; Nucleus; Transferase; Ubl conjugation
317	Q99KE1	NAD-dependent malic enzyme, mitochondrial OS=Mus musculus GN=Me2 PE=2 SV=1 - [MAOM_MOUSE]	20	30	71	33	272325	951666	282221	783778	269926	1471858		671962	274061	892375	306843	798915	286871	1.3403e+06	289259	1.01053e+06	3.49352	1.65731	4.09495e-08	3.75161e-07	FALSE	high	Q99KE1	NAD-dependent malic enzyme, mitochondrial (NAD-ME)	Malic enzyme 2	MAOM_MOUSE	Q99KE1	Q3TBM8	Me2	na	Mus musculus (Mouse)	10090	Q99KE1	MGI:2147351	Me2	MGI:2147351			Acetylation; Allosteric enzyme; Metal-binding; Mitochondrion; NAD; Oxidoreductase; Transit peptide
318	Q8BU30	Isoleucine--tRNA ligase, cytoplasmic OS=Mus musculus GN=Iars PE=2 SV=2 - [SYIC_MOUSE]	32	53	88	44	714899	773521	637506	645190	802442	455573		671522	719458	725329	693124	657651	852818	414853	755133	599278	-1.26007	-0.476346	0.108569	0.160125	FALSE	no	Q8BU30	Isoleucine--tRNA ligase, cytoplasmic	Isoleucyl-tRNA synthetase (IRS; IleRS)	SYIC_MOUSE	Q8BU30	Q6NXK4	Iars	na	Mus musculus (Mouse)	10090	Q8BU30	MGI:2145219	Iars	MGI:2145219			Acetylation; Aminoacyl-tRNA synthetase; ATP-binding; Cytoplasm; Ligase; Nucleotide-binding; Phosphoprotein; Protein biosynthesis
319	P12382	6-phosphofructokinase, liver type OS=Mus musculus GN=Pfkl PE=1 SV=4 - [K6PL_MOUSE]	21	32	76	33	789472	966688	656069	637308	654867	323689		671349	794506	906462	713307	649616	695978	294757	734597	616945	-1.1907	-0.500834	0.095687	0.14365	FALSE	no	P12382	ATP-dependent 6-phosphofructokinase, liver type (ATP-PFK; PFK-L)	6-phosphofructokinase type B; Phosphofructo-1-kinase isozyme B (PFK-B); Phosphohexokinase	PFKAL_MOUSE	P12382	Q8VDX7	Pfkl	Pfk-l; Pfkb	Mus musculus (Mouse)	10090	P12382	MGI:97547	Pfkl	MGI:97547			Acetylation; Allosteric enzyme; ATP-binding; Cytoplasm; Glycolysis; Glycoprotein; Kinase; Magnesium; Metal-binding; Nucleotide-binding; Phosphoprotein; Transferase
320	Q78PY7	Staphylococcal nuclease domain-containing protein 1 OS=Mus musculus GN=Snd1 PE=1 SV=1 - [SND1_MOUSE]	29	45	76	40	635679	737002	563427	587936	607209	892117		670562	639732	691085	612582	599291	645328	812378	632548	700918	1.10809	0.026497	0.927602	0.947155	FALSE	no	Q78PY7	Staphylococcal nuclease domain-containing protein 1	100 kDa coactivator; p100 co-activator	SND1_MOUSE	Q78PY7	Q3TT46; Q922L5; Q9R0S1	Snd1	na	Mus musculus (Mouse)	10090	Q78PY7	MGI:1929266	Snd1	MGI:1929266			Acetylation; Cytoplasm; Nucleus; Phosphoprotein; Repeat; Transcription; Transcription regulation
321	Q9CVB6	Actin-related protein 2/3 complex subunit 2 OS=Mus musculus GN=Arpc2 PE=1 SV=3 - [ARPC2_MOUSE]	16	20	32	20	682252	482969	689946	998780	730073	437816		670306	686602	452879	750139	1.01807e+06	775905	398683	737549	623211	-1.18347	-0.49028	0.106032	0.157045	FALSE	no	Q9CVB6	Actin-related protein 2/3 complex subunit 2	Arp2/3 complex 34 kDa subunit (p34-ARC)	ARPC2_MOUSE	Q9CVB6	Q3U870	Arpc2	na	Mus musculus (Mouse)	10090	Q9CVB6	MGI:1923959	Arpc2	MGI:1923959			Acetylation; Actin-binding; Cell junction; Cell projection; Cytoplasm; Cytoskeleton; Synapse; Synaptosome
322	Q02053	Ubiquitin-like modifier-activating enzyme 1 OS=Mus musculus GN=Uba1 PE=1 SV=1 - [UBA1_MOUSE]	25	42	82	29	968288	482602	834092	509731	947585	257793		666682	974462	452535	906861	519575	1.00707e+06	234751	962799	402287	-2.39331	-1.44584	2.09091e-06	1.05426e-05	FALSE	high	Q02053	Ubiquitin-like modifier-activating enzyme 1	Ubiquitin-activating enzyme E1; Ubiquitin-activating enzyme E1 X; Ubiquitin-like modifier-activating enzyme 1 X	UBA1_MOUSE	Q02053	A6H6S6; P31253; Q542H8	Uba1	Sbx; Ube1; Ube1ax; Ube1x	Mus musculus (Mouse)	10090	Q02053	MGI:98890	Uba1	MGI:98890			3D-structure; Acetylation; ATP-binding; Cytoplasm; Ligase; Mitochondrion; Nucleotide-binding; Nucleus; Phosphoprotein; Repeat; Ubl conjugation; Ubl conjugation pathway
323	Q04750	DNA topoisomerase 1 OS=Mus musculus GN=Top1 PE=1 SV=2 - [TOP1_MOUSE]	17	35	55	22	594088	566466	628828	710738	603925	886948		665166	597876	531174	683689	724464	641838	807672	641135	687770	1.07274	-0.0288563	0.921557	0.942445	FALSE	no	Q04750	DNA topoisomerase 1	DNA topoisomerase I	TOP1_MOUSE	Q04750	A2A4B7	Top1	Top-1	Mus musculus (Mouse)	10090	Q04750	MGI:98788	Top1	MGI:98788			Acetylation; Biological rhythms; DNA-binding; Isomerase; Isopeptide bond; Nucleus; Phosphoprotein; Topoisomerase; Ubl conjugation
324	Q99JY9	Actin-related protein 3 OS=Mus musculus GN=Actr3 PE=1 SV=3 - [ARP3_MOUSE]	15	26	57	39	694927	489127	698772	931171	743247	391735		658163	699358	458653	759735	949155	789906	356721	749667	588176	-1.27456	-0.593854	0.0505051	0.0819805	FALSE	low	Q99JY9	Actin-related protein 3	Actin-like protein 3	ARP3_MOUSE	Q99JY9	Q9DC56	Actr3	Arp3	Mus musculus (Mouse)	10090	Q99JY9	MGI:1921367	Actr3	MGI:1921367			Acetylation; Actin-binding; ATP-binding; Cell projection; Cilium biogenesis/degradation; Cytoplasm; Cytoskeleton; Nucleotide-binding
325	Q9Z1Z2	Serine-threonine kinase receptor-associated protein OS=Mus musculus GN=Strap PE=1 SV=2 - [STRAP_MOUSE]	13	16	27	19	640280	807046	669376	507582	685650	613433		653894	644363	756766	727775	517385	728694	558604	700277	610918	-1.14627	-0.325477	0.265809	0.346269	FALSE	no	Q9Z1Z2	Serine-threonine kinase receptor-associated protein	UNR-interacting protein	STRAP_MOUSE	Q9Z1Z2	Q8BP89; Q8C6F6	Strap	Unrip	Mus musculus (Mouse)	10090	Q9Z1Z2	MGI:1329037	Strap	MGI:1329037			Cytoplasm; mRNA processing; mRNA splicing; Nucleus; Phosphoprotein; Repeat; WD repeat
326	P99024	Tubulin beta-5 chain OS=Mus musculus GN=Tubb5 PE=1 SV=1 - [TBB5_MOUSE]	4	26	156	17	798864	668887	722779	618889	788855	323293		653594	803958	627214	785837	630842	838378	294397	809391	517484	-1.56409	-0.835604	0.00540747	0.0112878	FALSE	med	P99024	Tubulin beta-5 chain	na	TBB5_MOUSE	P99024	B1B178; P05218; Q3TFB6; Q3THH9; Q3TIL1; Q3UAV4; Q3UF52; Q8WUC1; Q9CY33	Tubb5	na	Mus musculus (Mouse)	10090	P99024	MGI:107812	Tubb5	MGI:107812			Acetylation; Cytoplasm; Cytoskeleton; GTP-binding; Isopeptide bond; Methylation; Microtubule; Nucleotide-binding; Phosphoprotein; Ubl conjugation
327	P35979	60S ribosomal protein L12 OS=Mus musculus GN=Rpl12 PE=1 SV=2 - [RL12_MOUSE]	8	11	30	17	833181	560117	819270	501811	755253	451228		653477	838494	525221	890746	511502	802666	410897	843969	482540	-1.74901	-0.924328	0.00161505	0.00387686	FALSE	high	P35979	60S ribosomal protein L12	na	RL12_MOUSE	P35979	Q9CQK4	Rpl12	na	Mus musculus (Mouse)	10090	P35979	MGI:98002	Rpl12	MGI:98002			3D-structure; Acetylation; Phosphoprotein; Ribonucleoprotein; Ribosomal protein; RNA-binding
328	Q08943	FACT complex subunit SSRP1 OS=Mus musculus GN=Ssrp1 PE=1 SV=2 - [SSRP1_MOUSE]	17	28	52	25	499747	597936	464915	630521	446175	1281461		653459	502934	560683	505476	642698	474185	1.16692e+06	494198	790101	1.59875	0.486691	0.105623	0.156495	FALSE	no	Q08943	FACT complex subunit SSRP1	Facilitates chromatin transcription complex subunit SSRP1; Recombination signal sequence recognition protein 1; Structure-specific recognition protein 1; T160	SSRP1_MOUSE	Q08943	Q3U9Z2; Q3UJ75; Q4V9U4; Q8CGA6	Ssrp1	na	Mus musculus (Mouse)	10090	Q08943	MGI:107912	Ssrp1	MGI:107912			Acetylation; Alternative splicing; Chromosome; DNA damage; DNA repair; DNA replication; DNA-binding; Nucleus; Phosphoprotein; Transcription; Transcription regulation; Ubl conjugation
329	P46061	Ran GTPase-activating protein 1 OS=Mus musculus GN=Rangap1 PE=1 SV=2 - [RAGP1_MOUSE]	23	29	50	32	637236	487846	835580	738778	764397	454236		653012	641299	457452	908479	753046	812384	413636	787388	541378	-1.45441	-0.688045	0.0194178	0.035074	FALSE	med	P46061	Ran GTPase-activating protein 1 (RanGAP1)	na	RAGP1_MOUSE	P46061	Q60801; Q6NZB5	Rangap1	Fug1	Mus musculus (Mouse)	10090	P46061	MGI:103071	Rangap1	MGI:103071			3D-structure; Acetylation; Centromere; Chromosome; Cytoplasm; Cytoskeleton; GTPase activation; Isopeptide bond; Kinetochore; Leucine-rich repeat; Membrane; Nucleus; Phosphoprotein; Repeat; Ubl conjugation
330	Q9DB77	Cytochrome b-c1 complex subunit 2, mitochondrial OS=Mus musculus GN=Uqcrc2 PE=1 SV=1 - [QCR2_MOUSE]	14	20	42	18	226943	1039099	220169	701214	223865	1497199		651415	228390	974361	239377	714757	237919	1.36338e+06	235229	1.0175e+06	4.32557	1.95179	1.5742e-10	3.55127e-09	FALSE	high	Q9DB77	Cytochrome b-c1 complex subunit 2, mitochondrial	Complex III subunit 2; Core protein II; Ubiquinol-cytochrome-c reductase complex core protein 2	QCR2_MOUSE	Q9DB77	Q8BK11; Q9CVK7	Uqcrc2	na	Mus musculus (Mouse)	10090	Q9DB77	MGI:1914253	Uqcrc2	MGI:1914253			Acetylation; Electron transport; Membrane; Mitochondrion; Mitochondrion inner membrane; Respiratory chain; Transit peptide; Transport
331	Q91VC3	Eukaryotic initiation factor 4A-III OS=Mus musculus GN=Eif4a3 PE=2 SV=3 - [IF4A3_MOUSE]	20	30	74	30	653962	797561	665552	465342	712971	607191		650430	658132	747871	723617	474329	757730	552920	713160	591707	-1.20526	-0.404136	0.167873	0.23394	FALSE	no	Q91VC3	Eukaryotic initiation factor 4A-III, N-terminally processed	ATP-dependent RNA helicase DDX48; ATP-dependent RNA helicase eIF4A-3; DEAD box protein 48; Eukaryotic translation initiation factor 4A isoform 3	IF4A3_MOUSE	Q91VC3	B2RY38; Q3TEZ8; Q3UD29; Q8BVY3	Eif4a3	Ddx48	Mus musculus (Mouse)	10090	Q91VC3	MGI:1923731	Eif4a3	MGI:1923731			Acetylation; ATP-binding; Cytoplasm; Helicase; Hydrolase; mRNA processing; mRNA splicing; mRNA transport; Nonsense-mediated mRNA decay; Nucleotide-binding; Nucleus; Phosphoprotein; RNA-binding; rRNA processing; Spliceosome; Translation regulation; Transport
332	P51410	60S ribosomal protein L9 OS=Mus musculus GN=Rpl9 PE=1 SV=2 - [RL9_MOUSE]	9	14	31	15	727393	659655	740631	646796	684759	439756		649832	732031	618557	805246	659288	727747	400450	755008	559432	-1.3496	-0.57475	0.0499643	0.0812598	FALSE	low	P51410	60S ribosomal protein L9	na	RL9_MOUSE	P51410	Q9JK58	Rpl9	na	Mus musculus (Mouse)	10090	P51410	MGI:1298373	Rpl9	MGI:1298373			Acetylation; Polymorphism; Ribonucleoprotein; Ribosomal protein; Tumor antigen
333	P46638	Ras-related protein Rab-11B OS=Mus musculus GN=Rab11b PE=1 SV=3 - [RB11B_MOUSE]	8	9	23	18	455174	887505	428952	796714	377976	938902		647537	458076	832212	466375	812101	401705	854982	442052	833098	1.88462	0.806363	0.00594426	0.0122026	FALSE	med	P46638	Ras-related protein Rab-11B	na	RB11B_MOUSE	P46638	na	Rab11b	na	Mus musculus (Mouse)	10090	P46638	MGI:99425	Rab11b	MGI:99425			Acetylation; Cell junction; Citrullination; Cytoplasmic vesicle; Endosome; GTP-binding; Lipoprotein; Membrane; Methylation; Nucleotide-binding; Prenylation; Protein transport; Synapse; Transport
334	P49718	DNA replication licensing factor MCM5 OS=Mus musculus GN=Mcm5 PE=2 SV=1 - [MCM5_MOUSE]	31	44	84	39	684603	786168	697398	535275	662178	519035		647443	688968	737188	758241	545613	703748	472643	716986	585148	-1.22531	-0.427993	0.143193	0.204019	FALSE	no	P49718	DNA replication licensing factor MCM5	CDC46 homolog; P1-CDC46	MCM5_MOUSE	P49718	na	Mcm5	Cdc46; Mcmd5	Mus musculus (Mouse)	10090	P49718	MGI:103197	Mcm5	MGI:103197			Acetylation; ATP-binding; Cell cycle; DNA replication; DNA-binding; Helicase; Hydrolase; Nucleotide-binding; Nucleus
335	Q9R0P3	S-formylglutathione hydrolase OS=Mus musculus GN=Esd PE=1 SV=1 - [ESTD_MOUSE]	12	15	44	24	748712	324513	841774	734514	893017	340504		647172	753486	304295	915213	748700	949079	310069	872593	454355	-1.92051	-1.18685	0.000101646	0.000324835	FALSE	high	Q9R0P3	S-formylglutathione hydrolase (FGH)	Esterase 10; Esterase D; Sid 478	ESTD_MOUSE	Q9R0P3	Q80ZX4; Q9CWI4	Esd	Es10; Sid478	Mus musculus (Mouse)	10090	Q9R0P3	MGI:95421	Esd	MGI:95421			Acetylation; Cytoplasm; Cytoplasmic vesicle; Hydrolase; Serine esterase
336	Q9D6Z1	Nucleolar protein 56 OS=Mus musculus GN=Nop56 PE=1 SV=2 - [NOP56_MOUSE]	22	33	65	38	727650	534098	697477	446762	749784	718946		645786	732290	500823	758327	455390	796854	654686	762490	536966	-1.42	-0.633347	0.0307063	0.0530439	FALSE	low	Q9D6Z1	Nucleolar protein 56	Nucleolar protein 5A	NOP56_MOUSE	Q9D6Z1	Q3UD45; Q8BVL1; Q8VDT2; Q99LT8; Q9CT15	Nop56	Nol5a	Mus musculus (Mouse)	10090	Q9D6Z1	MGI:1914384	Nop56	MGI:1914384			Acetylation; Cytoplasm; Nucleus; Phosphoprotein; Ribonucleoprotein; Ribosome biogenesis
337	P61089	Ubiquitin-conjugating enzyme E2 N OS=Mus musculus GN=Ube2n PE=1 SV=1 - [UBE2N_MOUSE]	5	8	25	16	936126	324340	916593	413179	1005352	277652		645540	942095	304133	996560	421159	1.06847e+06	252835	1.00237e+06	326042	-3.07437	-1.76228	5.78311e-09	7.26524e-08	FALSE	high	P61089	Ubiquitin-conjugating enzyme E2 N	Bendless-like ubiquitin-conjugating enzyme; Ubc13; Ubiquitin carrier protein N; Ubiquitin-protein ligase N	UBE2N_MOUSE	P61089	Q16781; Q3TSL6; Q6ZWZ0; Q9DAJ6	Ube2n	Blu	Mus musculus (Mouse)	10090	P61089	MGI:1934835	Ube2n	MGI:1934835			Acetylation; ATP-binding; Cytoplasm; DNA damage; DNA repair; Isopeptide bond; Ligase; Nucleotide-binding; Nucleus; Ubl conjugation; Ubl conjugation pathway
338	O35129	Prohibitin-2 OS=Mus musculus GN=Phb2 PE=1 SV=1 - [PHB2_MOUSE]	11	14	35	20	280754	1073325	241893	635842	248399	1390591		645134	282544	1.00645e+06	262997	648122	263993	1.2663e+06	269845	973625	3.6081	1.68721	2.50955e-08	2.48351e-07	FALSE	high	O35129	Prohibitin-2	B-cell receptor-associated protein BAP37; Repressor of estrogen receptor activity	PHB2_MOUSE	O35129	O89075; Q61336	Phb2	na	Mus musculus (Mouse)	10090	O35129	MGI:102520	Phb2	MGI:102520			Acetylation; Coiled coil; Cytoplasm; Membrane; Mitochondrion; Mitochondrion inner membrane; Nucleus; Phosphoprotein; Receptor; Repressor; Transcription; Transcription regulation
339	P40124	Adenylyl cyclase-associated protein 1 OS=Mus musculus GN=Cap1 PE=1 SV=4 - [CAP1_MOUSE]	16	25	38	20	879861	331400	845440	666426	854349	292742		645036	885471	310753	919199	679297	907983	266576	904218	418875	-2.15868	-1.35515	1.01621e-05	4.18042e-05	FALSE	high	P40124	Adenylyl cyclase-associated protein 1 (CAP 1)	na	CAP1_MOUSE	P40124	Q8BPT7	Cap1	Cap	Mus musculus (Mouse)	10090	P40124	MGI:88262	Cap1	MGI:88262			Acetylation; Actin-binding; Cell membrane; Membrane; Phosphoprotein
340	P97311	DNA replication licensing factor MCM6 OS=Mus musculus GN=Mcm6 PE=1 SV=1 - [MCM6_MOUSE]	19	37	66	30	737617	794824	708185	466034	691959	468889		644585	742320	745305	769970	475034	735399	426979	749230	549106	-1.36445	-0.602902	0.0400961	0.0669491	FALSE	low	P97311	DNA replication licensing factor MCM6	Mis5 homolog	MCM6_MOUSE	P97311	Q80YQ7	Mcm6	Mcmd6; Mis5	Mus musculus (Mouse)	10090	P97311	MGI:1298227	Mcm6	MGI:1298227			Acetylation; ATP-binding; Cell cycle; DNA replication; DNA-binding; Glycoprotein; Helicase; Hydrolase; Nucleotide-binding; Nucleus; Phosphoprotein
341	P30416	Peptidyl-prolyl cis-trans isomerase FKBP4 OS=Mus musculus GN=Fkbp4 PE=1 SV=5 - [FKBP4_MOUSE]	16	24	47	26	936740	363642	786097	679117	806594	270766		640493	942713	340986	854679	692233	857230	246565	884874	426595	-2.07427	-1.30827	2.37203e-05	8.808e-05	FALSE	high	P30416	Peptidyl-prolyl cis-trans isomerase FKBP4, N-terminally processed	52 kDa FK506-binding protein (52 kDa FKBP; FKBP-52); 59 kDa immunophilin (p59); FK506-binding protein 4 (FKBP-4); FKBP59; HSP-binding immunophilin (HBI); Immunophilin FKBP52; Rotamase	FKBP4_MOUSE	P30416	Q3TVC9	Fkbp4	Fkpb52	Mus musculus (Mouse)	10090	P30416	MGI:95543	Fkbp4	MGI:95543			Acetylation; Chaperone; Cytoplasm; Cytoskeleton; Isomerase; Microtubule; Mitochondrion; Nucleus; Phosphoprotein; Repeat; Rotamase; TPR repeat
342	Q99L47	Hsc70-interacting protein OS=Mus musculus GN=St13 PE=1 SV=1 - [F10A1_MOUSE]	9	18	33	16	920197	303175	855593	583560	902694	275216		640072	926065	284287	930238	594830	959363	250617	938555	376578	-2.49233	-1.54489	5.22358e-07	3.19973e-06	FALSE	high	Q99L47	Hsc70-interacting protein (Hip)	Protein FAM10A1; Protein ST13 homolog	F10A1_MOUSE	Q99L47	Q4FJT4	St13	Fam10a1; Hip	Mus musculus (Mouse)	10090	Q99L47	MGI:1917606	St13	MGI:1917606			Acetylation; Chaperone; Cytoplasm; Phosphoprotein; Repeat; TPR repeat
343	Q99PT1	Rho GDP-dissociation inhibitor 1 OS=Mus musculus GN=Arhgdia PE=1 SV=3 - [GDIR1_MOUSE]	10	18	32	19	935269	220144	959686	383522	1128016	162845		631580	941233	206429	1.04341e+06	390929	1.19883e+06	148290	1.06116e+06	248549	-4.26941	-2.31994	2.70654e-13	1.33607e-11	FALSE	high	Q99PT1	Rho GDP-dissociation inhibitor 1 (Rho GDI 1)	GDI-1; Rho-GDI alpha	GDIR1_MOUSE	Q99PT1	Q5M9P6; Q8BPI0; Q99KC4	Arhgdia	C87222; Gdi1	Mus musculus (Mouse)	10090	Q99PT1	MGI:2178103	Arhgdia	MGI:2178103			3D-structure; Acetylation; Cytoplasm; GTPase activation; Phosphoprotein
344	Q922F4	Tubulin beta-6 chain OS=Mus musculus GN=Tubb6 PE=1 SV=1 - [TBB6_MOUSE]	10	23	101	31	625635	763210	643957	654977	703301	397454		631422	629624	715661	700138	667627	747453	361929	692405	581739	-1.19023	-0.417698	0.160568	0.22503	FALSE	no	Q922F4	Tubulin beta-6 chain	na	TBB6_MOUSE	Q922F4	na	Tubb6	na	Mus musculus (Mouse)	10090	Q922F4	MGI:1915201	Tubb6	MGI:1915201			Cytoplasm; Cytoskeleton; GTP-binding; Microtubule; Nucleotide-binding; Phosphoprotein
345	Q9R0P5	Destrin OS=Mus musculus GN=Dstn PE=1 SV=3 - [DEST_MOUSE]	12	15	39	24	633558	429821	745905	848638	814596	313447		630994	637598	403042	810980	865028	865735	285431	771438	517834	-1.48974	-0.835388	0.00665559	0.0134427	FALSE	med	Q9R0P5	Destrin	Actin-depolymerizing factor (ADF); Sid 23	DEST_MOUSE	Q9R0P5	na	Dstn	Dsn; Sid23	Mus musculus (Mouse)	10090	Q9R0P5	MGI:1929270	Dstn	MGI:1929270			Acetylation; Actin-binding; Phosphoprotein; Ubl conjugation
346	Q91VI7	Ribonuclease inhibitor OS=Mus musculus GN=Rnh1 PE=1 SV=1 - [RINI_MOUSE]	18	22	49	26	572935	962712	484991	605280	536027	622547		630749	576588	902733	527303	616970	569678	566903	557856	695535	1.2468	0.178125	0.541078	0.620997	FALSE	no	Q91VI7	Ribonuclease inhibitor	Ribonuclease/angiogenin inhibitor 1	RINI_MOUSE	Q91VI7	Q924P4	Rnh1	Rnh	Mus musculus (Mouse)	10090	Q91VI7	MGI:1195456	Rnh1	MGI:1195456			3D-structure; Acetylation; Cytoplasm; Leucine-rich repeat; Phosphoprotein; Repeat
347	P70670	Nascent polypeptide-associated complex subunit alpha, muscle-specific form OS=Mus musculus GN=Naca PE=1 SV=2 - [NACAM_MOUSE]	6	40	60	17	999379	240878	1100953	354654	906603	180706		630529	1.00575e+06	225871	1.197e+06	361503	963518	164554	1.05542e+06	250643	-4.21087	-2.25534	2.24966e-13	1.12376e-11	FALSE	high	P70670	Nascent polypeptide-associated complex subunit alpha, muscle-specific form	Alpha-NAC, muscle-specific form (skNAC)	NACAM_MOUSE	P70670	E9QMB1	Naca	Gm1878	Mus musculus (Mouse)	10090	P70670	MGI:106095	Naca	MGI:106095			Acetylation; Activator; Alternative splicing; Cytoplasm; DNA-binding; Nucleus; Phosphoprotein; Transcription; Transcription regulation; Transport
348	Q64337	Sequestosome-1 OS=Mus musculus GN=Sqstm1 PE=1 SV=1 - [SQSTM_MOUSE]	15	17	86	41	207525	1013538	86186	990455	84750	1400385		630473	208848	950393	93705.2	1.00958e+06	90070.4	1.27522e+06	130875	1.0784e+06	8.23993	3.04652	1.04694e-19	1.9968e-17	FALSE	high	Q64337	Sequestosome-1	STONE14; Ubiquitin-binding protein p62	SQSTM_MOUSE	Q64337	Q99JM8	Sqstm1	A170; STAP	Mus musculus (Mouse)	10090	Q64337	MGI:107931	Sqstm1	MGI:107931			3D-structure; Acetylation; Alternative splicing; Apoptosis; Autophagy; Cytoplasm; Cytoplasmic vesicle; Differentiation; Endoplasmic reticulum; Endosome; Immunity; Lysosome; Metal-binding; Nucleus; Phosphoprotein; Zinc; Zinc-finger
349	P00405	Cytochrome c oxidase subunit 2 OS=Mus musculus GN=Mtco2 PE=1 SV=1 - [COX2_MOUSE]	5	5	29	22	198191	980544	162541	677700	198606	1535690		625545	199455	919454	176722	690788	211074	1.39843e+06	195750	1.00289e+06	5.12332	2.188	9.17716e-13	3.88963e-11	FALSE	high	P00405	Cytochrome c oxidase subunit 2	Cytochrome c oxidase polypeptide II	COX2_MOUSE	P00405	Q85K21	Mtco2	COII; mt-Co2	Mus musculus (Mouse)	10090	P00405	MGI:102503	mt-Co2	MGI:102503			Copper; Electron transport; Membrane; Metal-binding; Mitochondrion; Mitochondrion inner membrane; Respiratory chain; Transmembrane; Transmembrane helix; Transport
350	Q61990	Poly(rC)-binding protein 2 OS=Mus musculus GN=Pcbp2 PE=1 SV=1 - [PCBP2_MOUSE]	10	19	52	24	540763	927352	555323	453110	622959	651099		625101	544211	869576	603771	461861	662067	592903	603350	641447	1.06314	-0.068161	0.817003	0.861993	FALSE	no	Q61990	Poly(rC)-binding protein 2	Alpha-CP2; CTBP (CBP); Putative heterogeneous nuclear ribonucleoprotein X (hnRNP X)	PCBP2_MOUSE	Q61990	Q61383; Q62042	Pcbp2	Cbp; Hnrnpx; Hnrpx	Mus musculus (Mouse)	10090	Q61990	MGI:108202	Pcbp2	MGI:108202			Alternative splicing; Antiviral defense; Cytoplasm; DNA-binding; Immunity; Innate immunity; Nucleus; Phosphoprotein; Repeat; Ribonucleoprotein; RNA-binding
351	Q9Z2U1	Proteasome subunit alpha type-5 OS=Mus musculus GN=Psma5 PE=1 SV=1 - [PSA5_MOUSE]	10	13	37	20	556304	587114	552367	655494	613491	783856		624771	559851	550536	600557	668154	652005	713794	604138	644161	1.06625	-0.0237154	0.935066	0.952084	FALSE	no	Q9Z2U1	Proteasome subunit alpha type-5	Macropain zeta chain; Multicatalytic endopeptidase complex zeta chain; Proteasome zeta chain	PSA5_MOUSE	Q9Z2U1	na	Psma5	na	Mus musculus (Mouse)	10090	Q9Z2U1	MGI:1347009	Psma5	MGI:1347009			3D-structure; Acetylation; Cytoplasm; Glycoprotein; Hydrolase; Nucleus; Phosphoprotein; Protease; Proteasome; Threonine protease
352	P56391	Cytochrome c oxidase subunit 6B1 OS=Mus musculus GN=Cox6b1 PE=1 SV=2 - [CX6B1_MOUSE]	6	7	19	13	262147	1016263	205833	663757	198979	1392175		623192	263819	952948	223791	676576	211470	1.26774e+06	233027	965755	4.1444	1.89768	5.37449e-10	9.93451e-09	FALSE	high	P56391	Cytochrome c oxidase subunit 6B1	Cytochrome c oxidase subunit VIb isoform 1 (COX VIb-1)	CX6B1_MOUSE	P56391	Q545A3	Cox6b1	Cox6b	Mus musculus (Mouse)	10090	P56391	MGI:107460	Cox6b1	MGI:107460			Acetylation; Disulfide bond; Mitochondrion
353	P53994	Ras-related protein Rab-2A OS=Mus musculus GN=Rab2a PE=1 SV=1 - [RAB2A_MOUSE]	10	13	27	20	326193	976995	292162	827722	253941	1060072		622848	328273	916126	317651	843708	269883	965321	305269	908385	2.97569	1.46525	8.6059e-07	4.91297e-06	FALSE	high	P53994	Ras-related protein Rab-2A	na	RAB2A_MOUSE	P53994	Q3UK45	Rab2a	Rab2	Mus musculus (Mouse)	10090	P53994	MGI:1928750	Rab2a	MGI:1928750			Acetylation; Endoplasmic reticulum; ER-Golgi transport; Golgi apparatus; GTP-binding; Lipoprotein; Membrane; Nucleotide-binding; Prenylation; Protein transport; Transport
354	P10852	4F2 cell-surface antigen heavy chain OS=Mus musculus GN=Slc3a2 PE=1 SV=1 - [4F2_MOUSE]	13	20	41	19	532914	674364	360488	1288289	404004	454935		619166	536312	632350	391938	1.31317e+06	429367	414272	452539	786597	1.73819	0.517626	0.103091	0.153013	FALSE	no	P10852	4F2 cell-surface antigen heavy chain (4F2hc)	Solute carrier family 3 member 2; CD_antigen=CD98	4F2_MOUSE	P10852	G3UWA6; Q54AH5	Slc3a2	Mdu1	Mus musculus (Mouse)	10090	P10852	MGI:96955	Slc3a2	MGI:96955			Alternative splicing; Amino-acid transport; Cell membrane; Disulfide bond; Glycoprotein; Isopeptide bond; Membrane; Phosphoprotein; Signal-anchor; Transmembrane; Transmembrane helix; Transport; Ubl conjugation
355	Q6ZQ38	Cullin-associated NEDD8-dissociated protein 1 OS=Mus musculus GN=Cand1 PE=2 SV=2 - [CAND1_MOUSE]	29	47	87	41	944109	246744	955710	461662	916171	190479		619146	950129	231371	1.03909e+06	470578	973686	173454	987635	291801	-3.38462	-2.005	1.1746e-10	2.75343e-09	FALSE	high	Q6ZQ38	Cullin-associated NEDD8-dissociated protein 1	Cullin-associated and neddylation-dissociated protein 1; p120 CAND1	CAND1_MOUSE	Q6ZQ38	Q6PFR0; Q9CV45	Cand1	D10Ertd516e; Kiaa0829	Mus musculus (Mouse)	10090	Q6ZQ38	MGI:1261820	Cand1	MGI:1261820			Acetylation; Cytoplasm; Nucleus; Phosphoprotein; Repeat; Ubl conjugation pathway
356	Q922R8	Protein disulfide-isomerase A6 OS=Mus musculus GN=Pdia6 PE=1 SV=3 - [PDIA6_MOUSE]	11	21	37	16	425821	1024275	315320	598768	317187	1030317		618615	428536	960461	342830	610332	337099	938226	369488	836340	2.26351	1.04662	0.000398248	0.00109505	FALSE	high	Q922R8	Protein disulfide-isomerase A6	Thioredoxin domain-containing protein 7	PDIA6_MOUSE	Q922R8	Q8BK54	Pdia6	Txndc7	Mus musculus (Mouse)	10090	Q922R8	MGI:1919103	Pdia6	MGI:1919103			3D-structure; Cell membrane; Chaperone; Disulfide bond; Endoplasmic reticulum; Isomerase; Membrane; Phosphoprotein; Redox-active center; Repeat; Signal
357	Q3U9G9	Lamin-B receptor OS=Mus musculus GN=Lbr PE=1 SV=2 - [LBR_MOUSE]	14	19	33	19	456733	759515	439690	573592	467911	995083		615421	459645	712196	478050	584670	497285	906141	478327	734336	1.53522	0.485058	0.0974895	0.145939	FALSE	no	Q3U9G9	Lamin-B receptor	Integral nuclear envelope inner membrane protein	LBR_MOUSE	Q3U9G9	Q3TSW2; Q811V8; Q811V9; Q8BST3; Q8K2Y8; Q8VDM0; Q91YS5; Q91Z27	Lbr	na	Mus musculus (Mouse)	10090	Q3U9G9	MGI:2138281	Lbr	MGI:2138281			Acetylation; DNA-binding; Glycoprotein; Membrane; Nucleus; Phosphoprotein; Receptor; Transmembrane; Transmembrane helix
358	Q8BG05	Heterogeneous nuclear ribonucleoprotein A3 OS=Mus musculus GN=Hnrnpa3 PE=1 SV=1 - [ROA3_MOUSE]	11	19	46	16	682630	541563	708230	235769	971962	550704		615143	686983	507823	770018	240322	1.03298e+06	501481	829994	416542	-1.99258	-1.16249	0.000106247	0.000338068	FALSE	high	Q8BG05	Heterogeneous nuclear ribonucleoprotein A3 (hnRNP A3)	na	ROA3_MOUSE	Q8BG05	Q8BHF8	Hnrnpa3	Hnrpa3	Mus musculus (Mouse)	10090	Q8BG05	MGI:1917171	Hnrnpa3	MGI:1917171			Acetylation; Alternative splicing; Methylation; mRNA processing; mRNA splicing; Nucleus; Phosphoprotein; Repeat; Ribonucleoprotein; RNA-binding; Spliceosome
359	Q91VR5	ATP-dependent RNA helicase DDX1 OS=Mus musculus GN=Ddx1 PE=1 SV=1 - [DDX1_MOUSE]	22	33	71	26	551426	888523	558155	518812	588844	584077		614973	554942	833166	606850	528832	625810	531871	595868	631290	1.05945	-0.0602857	0.836885	0.878551	FALSE	no	Q91VR5	ATP-dependent RNA helicase DDX1	DEAD box protein 1	DDX1_MOUSE	Q91VR5	Q3TU41	Ddx1	na	Mus musculus (Mouse)	10090	Q91VR5	MGI:2144727	Ddx1	MGI:2144727			Acetylation; Activator; ATP-binding; Cytoplasm; DNA-binding; Exonuclease; Helicase; Hydrolase; mRNA processing; Nuclease; Nucleotide-binding; Nucleus; Phosphoprotein; RNA-binding; Transcription; Transcription regulation; tRNA processing
360	P19536	Cytochrome c oxidase subunit 5B, mitochondrial OS=Mus musculus GN=Cox5b PE=1 SV=1 - [COX5B_MOUSE]	7	11	21	12	218531	982058	166719	666293	188064	1448199		611644	219924	920874	181264	679161	199870	1.31876e+06	200353	972931	4.85608	2.11887	4.66748e-12	1.61857e-10	FALSE	high	P19536	Cytochrome c oxidase subunit 5B, mitochondrial	Cytochrome c oxidase polypeptide Vb	COX5B_MOUSE	P19536	na	Cox5b	na	Mus musculus (Mouse)	10090	P19536	MGI:88475	Cox5b	MGI:88475			Acetylation; Membrane; Metal-binding; Mitochondrion; Mitochondrion inner membrane; Transit peptide; Zinc
361	P05064	Fructose-bisphosphate aldolase A OS=Mus musculus GN=Aldoa PE=1 SV=2 - [ALDOA_MOUSE]	13	20	63	29	950165	284951	831142	494732	875351	232030		611395	956224	267198	903654	504287	930304	211291	930060	327592	-2.83908	-1.72241	2.41639e-08	2.40265e-07	FALSE	high	P05064	Fructose-bisphosphate aldolase A	Aldolase 1; Muscle-type aldolase	ALDOA_MOUSE	P05064	na	Aldoa	Aldo1	Mus musculus (Mouse)	10090	P05064	MGI:87994	Aldoa	MGI:87994			Acetylation; Cytoplasm; Glycolysis; Lyase; Phosphoprotein; Schiff base
362	Q91YH5	Atlastin-3 OS=Mus musculus GN=Atl3 PE=2 SV=1 - [ATLA3_MOUSE]	18	23	39	20	368966	984988	341485	572714	357269	1039494		610819	371319	923621	371277	583775	379698	946583	374098	817993	2.18657	0.984979	0.000850658	0.00217777	FALSE	high	Q91YH5	Atlastin-3	na	ATLA3_MOUSE	Q91YH5	Q3UGW3; Q8C0L7; Q8C174; Q99LZ9	Atl3	na	Mus musculus (Mouse)	10090	Q91YH5	MGI:1924270	Atl3	MGI:1924270			Acetylation; Alternative splicing; Endoplasmic reticulum; GTP-binding; Hydrolase; Membrane; Nucleotide-binding; Transmembrane; Transmembrane helix
363	P46460	Vesicle-fusing ATPase OS=Mus musculus GN=Nsf PE=1 SV=2 - [NSF_MOUSE]	22	36	61	29	446997	984899	413512	578353	458310	780655		610454	449847	923538	449588	589523	487082	710879	462172	741313	1.60398	0.547325	0.0609583	0.096667	FALSE	low	P46460	Vesicle-fusing ATPase	N-ethylmaleimide-sensitive fusion protein (NEM-sensitive fusion protein); Suppressor of K(+) transport growth defect 2 (Protein SKD2); Vesicular-fusion protein NSF	NSF_MOUSE	P46460	A2A646; Q8BQ65; Q8C3R2; Q8CCT9; Q8CEF0; Q923C6	Nsf	Skd2	Mus musculus (Mouse)	10090	P46460	MGI:104560	Nsf	MGI:104560			Acetylation; ATP-binding; Cytoplasm; Hydrolase; Magnesium; Metal-binding; Nucleotide-binding; Phosphoprotein; Protein transport; Repeat; Transport
364	P42125	Enoyl-CoA delta isomerase 1, mitochondrial OS=Mus musculus GN=Eci1 PE=1 SV=2 - [ECI1_MOUSE]	11	13	32	19	320134	840760	222193	691590	229235	1345641		608259	322175	788379	241578	704947	243626	1.22537e+06	269126	906231	3.3673	1.60969	1.26662e-07	9.81223e-07	FALSE	high	P42125	Enoyl-CoA delta isomerase 1, mitochondrial	3,2-trans-enoyl-CoA isomerase; Delta(3),Delta(2)-enoyl-CoA isomerase (D3,D2-enoyl-CoA isomerase); Dodecenoyl-CoA isomerase	ECI1_MOUSE	P42125	Q8QZV3	Eci1	Dci	Mus musculus (Mouse)	10090	P42125	MGI:94871	Eci1	MGI:94871			Acetylation; Fatty acid metabolism; Isomerase; Lipid metabolism; Mitochondrion; Transit peptide
365	P08030	Adenine phosphoribosyltransferase OS=Mus musculus GN=Aprt PE=1 SV=2 - [APT_MOUSE]	10	11	41	19	727167	422943	741594	500713	877982	369057		606576	731804	396593	806293	510383	933100	336070	823732	414349	-1.98802	-1.11618	0.000171262	0.000510379	FALSE	high	P08030	Adenine phosphoribosyltransferase (APRT)	na	APT_MOUSE	P08030	Q564P4; Q61319; Q6PK77; Q9DCY3	Aprt	na	Mus musculus (Mouse)	10090	P08030	MGI:88061	Aprt	MGI:88061			Acetylation; Cytoplasm; Glycosyltransferase; Phosphoprotein; Purine salvage; Transferase
366	Q8CG47	Structural maintenance of chromosomes protein 4 OS=Mus musculus GN=Smc4 PE=1 SV=1 - [SMC4_MOUSE]	27	55	79	32	514751	888781	485443	606462	484806	655399		605940	518033	833408	527795	618175	515241	596819	520356	682801	1.31218	0.264676	0.362789	0.447461	FALSE	no	Q8CG47	Structural maintenance of chromosomes protein 4 (SMC protein 4; SMC-4)	Chromosome-associated polypeptide C; XCAP-C homolog	SMC4_MOUSE	Q8CG47	Q8BTS7; Q8BTY9; Q99K21	Smc4	Capc; Smc4l1	Mus musculus (Mouse)	10090	Q8CG47	MGI:1917349	Smc4	MGI:1917349			3D-structure; Acetylation; ATP-binding; Cell cycle; Cell division; Chromosome; Coiled coil; Cytoplasm; DNA condensation; Mitosis; Nucleotide-binding; Nucleus; Phosphoprotein
367	Q62318	Transcription intermediary factor 1-beta OS=Mus musculus GN=Trim28 PE=1 SV=3 - [TIF1B_MOUSE]	21	33	64	31	750815	609236	736671	354872	761149	422615		605893	755603	571279	800941	361726	808932	384841	788492	439282	-1.79496	-0.984997	0.000837745	0.00214996	FALSE	high	Q62318	Transcription intermediary factor 1-beta (TIF1-beta)	E3 SUMO-protein ligase TRIM28; KRAB-A-interacting protein; KRIP-1; Tripartite motif-containing protein 28	TIF1B_MOUSE	Q62318	P70391; Q8C283; Q99PN4	Trim28	Kap1; Krip1; Tif1b	Mus musculus (Mouse)	10090	Q62318	MGI:109274	Trim28	MGI:109274			Acetylation; Alternative splicing; Bromodomain; Citrullination; Isopeptide bond; Ligase; Metal-binding; Nucleus; Phosphoprotein; Repeat; Repressor; Transcription; Transcription regulation; Ubl conjugation; Ubl conjugation pathway; Zinc; Zinc-finger
368	O08795	Glucosidase 2 subunit beta OS=Mus musculus GN=Prkcsh PE=1 SV=1 - [GLU2B_MOUSE]	13	18	28	14	458236	808171	352508	618080	424654	939560		600202	461158	757820	383262	630017	451313	855581	431911	747806	1.73139	0.674833	0.0208735	0.0375258	FALSE	med	O08795	Glucosidase 2 subunit beta	80K-H protein; Glucosidase II subunit beta; Protein kinase C substrate 60.1 kDa protein heavy chain (PKCSH)	GLU2B_MOUSE	O08795	Q921X2	Prkcsh	na	Mus musculus (Mouse)	10090	O08795	MGI:107877	Prkcsh	MGI:107877			Alternative splicing; Calcium; Endoplasmic reticulum; Glycoprotein; Metal-binding; Phosphoprotein; Repeat; Signal
369	P15864	Histone H1.2 OS=Mus musculus GN=Hist1h1c PE=1 SV=2 - [H12_MOUSE]	4	15	39	10	684258	523943	542504	409375	728632	707589		599384	688621	491300	589834	417281	774374	644344	684276	517642	-1.32191	-0.527853	0.0704839	0.110313	FALSE	no	P15864	Histone H1.2	H1 VAR.1; H1c	H12_MOUSE	P15864	na	Hist1h1c	H1f2	Mus musculus (Mouse)	10090	P15864	MGI:1931526	Hist1h1c	MGI:1931526			Acetylation; Chromosome; Citrullination; DNA-binding; Isopeptide bond; Methylation; Nucleus; Phosphoprotein; Ubl conjugation
370	Q9D855	Cytochrome b-c1 complex subunit 7 OS=Mus musculus GN=Uqcrb PE=1 SV=3 - [QCR7_MOUSE]	7	10	18	13	250828	988002	240672	675452	247003	1189821		598630	252427	926448	261669	688497	262509	1.08347e+06	258869	899473	3.47463	1.66157	2.9497e-08	2.85842e-07	FALSE	high	Q9D855	Cytochrome b-c1 complex subunit 7	Complex III subunit 7; Complex III subunit VII; Ubiquinol-cytochrome c reductase complex 14 kDa protein	QCR7_MOUSE	Q9D855	Q8K2E2	Uqcrb	na	Mus musculus (Mouse)	10090	Q9D855	MGI:1914780	Uqcrb	MGI:1914780			Acetylation; Electron transport; Membrane; Mitochondrion; Mitochondrion inner membrane; Respiratory chain; Transport
371	P11031	Activated RNA polymerase II transcriptional coactivator p15 OS=Mus musculus GN=Sub1 PE=1 SV=3 - [TCP4_MOUSE]	7	10	27	16	715413	556109	821730	264533	936050	269117		593825	719975	521462	893421	269642	994813	245063	869403	345389	-2.51717	-1.52043	7.45732e-07	4.35201e-06	FALSE	high	P11031	Activated RNA polymerase II transcriptional coactivator p15	Positive cofactor 4 (PC4); SUB1 homolog; Single-stranded DNA-binding protein p9; p14	TCP4_MOUSE	P11031	Q3UJR5; Q543N2	Sub1	Pc4; Rpo2tc1	Mus musculus (Mouse)	10090	P11031	MGI:104811	Sub1	MGI:104811			Acetylation; Activator; DNA-binding; Nucleus; Phosphoprotein; Transcription; Transcription regulation
372	Q9QUM9	Proteasome subunit alpha type-6 OS=Mus musculus GN=Psma6 PE=1 SV=1 - [PSA6_MOUSE]	9	11	44	22	566690	608149	519161	556909	576204	734673		593631	570304	570260	564454	567665	612377	669007	582378	602311	1.03423	-0.0653693	0.822015	0.866191	FALSE	no	Q9QUM9	Proteasome subunit alpha type-6	Macropain iota chain; Multicatalytic endopeptidase complex iota chain; Proteasome iota chain	PSA6_MOUSE	Q9QUM9	Q0VGS3; Q3TT07; Q3U6Y2	Psma6	na	Mus musculus (Mouse)	10090	Q9QUM9	MGI:1347006	Psma6	MGI:1347006			3D-structure; Acetylation; Cytoplasm; Glycoprotein; Hydrolase; Isopeptide bond; Nucleus; Phosphoprotein; Protease; Proteasome; Threonine protease; Ubl conjugation
373	Q91WQ3	Tyrosine--tRNA ligase, cytoplasmic OS=Mus musculus GN=Yars PE=2 SV=3 - [SYYC_MOUSE]	20	29	43	25	909105	393869	680993	467180	832317	260330		590632	914902	369330	740405	476203	884568	237061	846625	360865	-2.3461	-1.39458	4.40045e-06	2.01136e-05	FALSE	high	Q91WQ3	Tyrosine--tRNA ligase, cytoplasmic, N-terminally processed	Tyrosyl-tRNA synthetase (TyrRS)	SYYC_MOUSE	Q91WQ3	Q3TEC8; Q3U9A1; Q3UTA7; Q8BVT2; Q8C183	Yars	na	Mus musculus (Mouse)	10090	Q91WQ3	MGI:2147627	Yars	MGI:2147627			Acetylation; Aminoacyl-tRNA synthetase; ATP-binding; Cytoplasm; Ligase; Nucleotide-binding; Protein biosynthesis; RNA-binding; tRNA-binding
374	P13864	DNA (cytosine-5)-methyltransferase 1 OS=Mus musculus GN=Dnmt1 PE=1 SV=5 - [DNMT1_MOUSE]	34	62	83	31	628451	503090	722976	495046	699426	487099		589348	632458	471747	786051	504607	743334	443561	720615	473305	-1.52252	-0.713039	0.0144992	0.0271722	FALSE	med	P13864	DNA (cytosine-5)-methyltransferase 1 (Dnmt1; Met-1)	DNA methyltransferase MmuI (DNA MTase MmuI; M.MmuI); MCMT	DNMT1_MOUSE	P13864	P97413; Q80ZU3; Q9CSC6; Q9QXX6	Dnmt1	Dnmt; Met1; Uim	Mus musculus (Mouse)	10090	P13864	MGI:94912	Dnmt1	MGI:94912			3D-structure; Acetylation; Activator; Allosteric enzyme; Alternative splicing; Chromatin regulator; Cytoplasm; DNA-binding; Metal-binding; Methylation; Methyltransferase; Nucleus; Phosphoprotein; Repeat; Repressor; S-adenosyl-L-methionine; Transcription; Transcription regulation; Transferase; Ubl conjugation; Zinc; Zinc-finger
375	Q91WD5	NADH dehydrogenase [ubiquinone] iron-sulfur protein 2, mitochondrial OS=Mus musculus GN=Ndufs2 PE=1 SV=1 - [NDUS2_MOUSE]	13	19	43	31	275345	881165	256909	603623	263300	1251344		588614	277101	826267	279323	615281	279829	1.1395e+06	278751	860348	3.08644	1.46881	9.81733e-07	5.47786e-06	FALSE	high	Q91WD5	NADH dehydrogenase [ubiquinone] iron-sulfur protein 2, mitochondrial	Complex I-49kD (CI-49kD); NADH-ubiquinone oxidoreductase 49 kDa subunit	NDUS2_MOUSE	Q91WD5	Q3TNA8; Q3U5Y9; Q3UJX7; Q99L23	Ndufs2	na	Mus musculus (Mouse)	10090	Q91WD5	MGI:2385112	Ndufs2	MGI:2385112			4Fe-4S; Acetylation; Electron transport; Iron; Iron-sulfur; Membrane; Metal-binding; Methylation; Mitochondrion; Mitochondrion inner membrane; NAD; Oxidoreductase; Respiratory chain; Transit peptide; Transport; Ubiquinone
376	Q9Z2X1	Heterogeneous nuclear ribonucleoprotein F OS=Mus musculus GN=Hnrnpf PE=1 SV=3 - [HNRPF_MOUSE]	9	18	59	22	665285	731829	579271	364011	684250	493979		586438	669527	686235	629809	371041	727206	449827	675514	502367	-1.34466	-0.584749	0.0462378	0.0757275	FALSE	low	Q9Z2X1	Heterogeneous nuclear ribonucleoprotein F, N-terminally processed (hnRNP F)	na	HNRPF_MOUSE	Q9Z2X1	Q5FWK2; Q8BVU8; Q8K2U9; Q8R0E7	Hnrnpf	Hnrpf	Mus musculus (Mouse)	10090	Q9Z2X1	MGI:2138741	Hnrnpf	MGI:2138741			3D-structure; Acetylation; Alternative splicing; Isopeptide bond; mRNA processing; mRNA splicing; Nucleus; Phosphoprotein; Repeat; Ribonucleoprotein; RNA-binding; Spliceosome; Ubl conjugation
377	P62830	60S ribosomal protein L23 OS=Mus musculus GN=Rpl23 PE=1 SV=1 - [RL23_MOUSE]	6	10	56	26	520186	743544	565255	530811	626806	525992		585432	523503	697220	614570	541063	666156	478978	601409	572420	-1.05064	-0.192921	0.50973	0.591817	FALSE	no	P62830	60S ribosomal protein L23	na	RL23_MOUSE	P62830	P23131; P24048; Q29246; Q3THU4; Q9CZE6; Q9DCQ4	Rpl23	na	Mus musculus (Mouse)	10090	P62830	MGI:1929455	Rpl23	MGI:1929455			Phosphoprotein; Ribonucleoprotein; Ribosomal protein
378	Q9CQA3	Succinate dehydrogenase [ubiquinone] iron-sulfur subunit, mitochondrial OS=Mus musculus GN=Sdhb PE=1 SV=1 - [SDHB_MOUSE]	8	16	31	17	236320	1025698	188156	493156	252357	1313027		584786	237827	961795	204571	502680	268199	1.19567e+06	236866	886714	3.74353	1.71303	1.35738e-08	1.50279e-07	FALSE	high	Q9CQA3	Succinate dehydrogenase [ubiquinone] iron-sulfur subunit, mitochondrial	Iron-sulfur subunit of complex II (Ip)	SDHB_MOUSE	Q9CQA3	Q3TF82; Q9DC91	Sdhb	na	Mus musculus (Mouse)	10090	Q9CQA3	MGI:1914930	Sdhb	MGI:1914930			2Fe-2S; 3Fe-4S; 4Fe-4S; Acetylation; Electron transport; Iron; Iron-sulfur; Membrane; Metal-binding; Mitochondrion; Mitochondrion inner membrane; Oxidoreductase; Transit peptide; Transport; Tricarboxylic acid cycle
379	Q9CZ13	Cytochrome b-c1 complex subunit 1, mitochondrial OS=Mus musculus GN=Uqcrc1 PE=1 SV=2 - [QCR1_MOUSE]	12	17	31	16	325593	845704	305826	626876	306678	1095144		584304	327669	793015	332507	638983	325931	997259	328702	809752	2.46348	1.16578	8.30991e-05	0.000273049	FALSE	high	Q9CZ13	Cytochrome b-c1 complex subunit 1, mitochondrial	Complex III subunit 1; Core protein I; Ubiquinol-cytochrome-c reductase complex core protein 1	QCR1_MOUSE	Q9CZ13	Q3TV75; Q9CWL6	Uqcrc1	na	Mus musculus (Mouse)	10090	Q9CZ13	MGI:107876	Uqcrc1	MGI:107876			Acetylation; Electron transport; Membrane; Mitochondrion; Mitochondrion inner membrane; Respiratory chain; Transit peptide; Transport
380	Q76MZ3	Serine/threonine-protein phosphatase 2A 65 kDa regulatory subunit A alpha isoform OS=Mus musculus GN=Ppp2r1a PE=1 SV=3 - [2AAA_MOUSE]	12	24	64	25	744302	351228	736584	553901	826432	291066		583919	749048	329346	800846	564598	878314	265050	809403	386331	-2.0951	-1.25236	3.43587e-05	0.000123327	FALSE	high	Q76MZ3	Serine/threonine-protein phosphatase 2A 65 kDa regulatory subunit A alpha isoform	PP2A subunit A isoform PR65-alpha; PP2A subunit A isoform R1-alpha	2AAA_MOUSE	Q76MZ3	na	Ppp2r1a	na	Mus musculus (Mouse)	10090	Q76MZ3	MGI:1926334	Ppp2r1a	MGI:1926334			3D-structure; Acetylation; Centromere; Chromosome; Chromosome partition; Cytoplasm; Repeat
381	P49312	Heterogeneous nuclear ribonucleoprotein A1 OS=Mus musculus GN=Hnrnpa1 PE=1 SV=2 - [ROA1_MOUSE]	11	21	63	23	836545	413994	791133	227973	874138	353219		582834	841879	388201	860154	232376	929015	321648	877016	314075	-2.79238	-1.62215	5.9289e-08	5.14001e-07	FALSE	high	P49312	Heterogeneous nuclear ribonucleoprotein A1, N-terminally processed	HDP-1; Helix-destabilizing protein; Single-strand-binding protein; Topoisomerase-inhibitor suppressed; hnRNP core protein A1	ROA1_MOUSE	P49312	P97312; Q3V269	Hnrnpa1	Fli-2; Hnrpa1; Tis	Mus musculus (Mouse)	10090	P49312	MGI:104820	Hnrnpa1	MGI:104820			Acetylation; Alternative splicing; Cytoplasm; Isopeptide bond; Methylation; mRNA processing; mRNA splicing; mRNA transport; Nucleus; Phosphoprotein; Repeat; Ribonucleoprotein; RNA-binding; Spliceosome; Transport; Ubl conjugation
382	P47962	60S ribosomal protein L5 OS=Mus musculus GN=Rpl5 PE=1 SV=3 - [RL5_MOUSE]	13	24	57	26	730886	358875	773439	408481	835888	389285		582809	735547	336516	840917	416370	888363	354490	821609	369126	-2.22582	-1.26656	1.78699e-05	6.86651e-05	FALSE	high	P47962	60S ribosomal protein L5	na	RL5_MOUSE	P47962	Q9CR19	Rpl5	na	Mus musculus (Mouse)	10090	P47962	MGI:102854	Rpl5	MGI:102854			Acetylation; Cytoplasm; Nucleus; Phosphoprotein; Ribonucleoprotein; Ribosomal protein; RNA-binding; rRNA-binding
383	O08528	Hexokinase-2 OS=Mus musculus GN=Hk2 PE=2 SV=1 - [HXK2_MOUSE]	24	48	80	35	316625	1059826	239939	561483	298930	1009923		581121	318644	993797	260872	572327	317696	919655	299071	828593	2.77056	1.32551	7.35374e-06	3.12944e-05	FALSE	high	O08528	Hexokinase-2	Hexokinase type II (HK II)	HXK2_MOUSE	O08528	na	Hk2	na	Mus musculus (Mouse)	10090	O08528	MGI:1315197	Hk2	MGI:1315197			Allosteric enzyme; ATP-binding; Glycolysis; Kinase; Nucleotide-binding; Repeat; Transferase
384	P56959	RNA-binding protein FUS OS=Mus musculus GN=Fus PE=2 SV=1 - [FUS_MOUSE]	9	21	35	12	1015484	271550	821773	118514	937439	319664		580737	1.02196e+06	254632	893467	120803	996289	291092	970572	222176	-4.36849	-2.3316	6.14937e-14	3.62923e-12	FALSE	high	P56959	RNA-binding protein FUS	Protein pigpen	FUS_MOUSE	P56959	na	Fus	na	Mus musculus (Mouse)	10090	P56959	MGI:1353633	Fus	MGI:1353633			DNA-binding; Metal-binding; Methylation; Nucleus; Phosphoprotein; Repeat; RNA-binding; Zinc; Zinc-finger
385	P60766	Cell division control protein 42 homolog OS=Mus musculus GN=Cdc42 PE=1 SV=2 - [CDC42_MOUSE]	6	8	29	17	584246	460956	555874	1007696	481919	393148		580640	587971	432238	604370	1.02716e+06	512173	358008	568172	605801	1.06623	-0.182476	0.546421	0.62593	FALSE	no	P60766	Cell division control protein 42 homolog	G25K GTP-binding protein	CDC42_MOUSE	P60766	A2A9U6; P21181; P25763; Q3THZ7; Q3TJK6; Q545V0; Q6P201; Q8BQ51	Cdc42	na	Mus musculus (Mouse)	10090	P60766	MGI:106211	Cdc42	MGI:106211			3D-structure; Alternative splicing; Cell membrane; Cytoplasm; Cytoskeleton; Differentiation; GTP-binding; Lipoprotein; Membrane; Methylation; Neurogenesis; Nucleotide-binding; Phosphoprotein; Prenylation
386	P46978	Dolichyl-diphosphooligosaccharide--protein glycosyltransferase subunit STT3A OS=Mus musculus GN=Stt3a PE=1 SV=1 - [STT3A_MOUSE]	11	20	30	16	268843	978402	242028	713499	188846	1091647		580544	270557	917446	263143	727279	200701	994074	244801	879600	3.59313	1.7335	9.61387e-09	1.11745e-07	FALSE	high	P46978	Dolichyl-diphosphooligosaccharide--protein glycosyltransferase subunit STT3A (Oligosaccharyl transferase subunit STT3A; STT3-A)	B5; Integral membrane protein 1	STT3A_MOUSE	P46978	na	Stt3a	Itm1	Mus musculus (Mouse)	10090	P46978	MGI:105124	Stt3a	MGI:105124			Endoplasmic reticulum; Glycoprotein; Glycosyltransferase; Membrane; Transferase; Transmembrane; Transmembrane helix
387	Q8CG48	Structural maintenance of chromosomes protein 2 OS=Mus musculus GN=Smc2 PE=1 SV=2 - [SMC2_MOUSE]	32	57	77	37	516747	767692	509537	587136	466999	623614		578621	520042	719863	553991	598475	496316	567875	523450	628738	1.20114	0.147671	0.610779	0.685065	FALSE	no	Q8CG48	Structural maintenance of chromosomes protein 2 (SMC protein 2; SMC-2)	Chromosome-associated protein E; FGF-inducible protein 16; XCAP-E homolog	SMC2_MOUSE	Q8CG48	Q52KE9; Q61076; Q9CS17; Q9CSD8	Smc2	Cape; Fin16; Smc2l1	Mus musculus (Mouse)	10090	Q8CG48	MGI:106067	Smc2	MGI:106067			3D-structure; Acetylation; ATP-binding; Cell cycle; Cell division; Chromosome; Coiled coil; Cytoplasm; DNA condensation; Mitosis; Nucleotide-binding; Nucleus
388	Q9WUP7	Ubiquitin carboxyl-terminal hydrolase isozyme L5 OS=Mus musculus GN=Uchl5 PE=1 SV=2 - [UCHL5_MOUSE]	12	19	30	14	664064	646828	601647	472651	577526	481214		573988	668298	606529	654137	481779	613782	438203	645406	508837	-1.26839	-0.466371	0.108666	0.160212	FALSE	no	Q9WUP7	Ubiquitin carboxyl-terminal hydrolase isozyme L5 (UCH-L5)	Ubiquitin C-terminal hydrolase UCH37; Ubiquitin thioesterase L5	UCHL5_MOUSE	Q9WUP7	Q9CVJ4; Q9CXZ3; Q9R107	Uchl5	Uch37	Mus musculus (Mouse)	10090	Q9WUP7	MGI:1914848	Uchl5	MGI:1914848			Acetylation; Alternative splicing; Cytoplasm; DNA damage; DNA recombination; DNA repair; Hydrolase; Nucleus; Protease; Proteasome; Thiol protease; Transcription; Transcription regulation; Ubl conjugation pathway
389	P63028	Translationally-controlled tumor protein OS=Mus musculus GN=Tpt1 PE=1 SV=1 - [TCTP_MOUSE]	5	7	36	20	862158	311814	923806	337301	731374	276578		573838	867656	292387	1.0044e+06	343815	777288	251857	883115	296020	-2.9833	-1.69117	1.42291e-08	1.56296e-07	FALSE	high	P63028	Translationally-controlled tumor protein (TCTP)	21 kDa polypeptide; p21; p23	TCTP_MOUSE	P63028	P14701; Q3TMT0; Q3TWS8; Q3TWX0; Q3UAG7; Q569M9	Tpt1	Trt	Mus musculus (Mouse)	10090	P63028	MGI:104890	Tpt1	MGI:104890			Calcium; Cytoplasm; Phosphoprotein
390	Q9DB15	39S ribosomal protein L12, mitochondrial OS=Mus musculus GN=Mrpl12 PE=1 SV=2 - [RM12_MOUSE]	9	11	37	17	282179	787866	204777	653484	291975	1216685		572828	283978	738781	222642	666105	310305	1.10794e+06	272308	837607	3.07595	1.48837	5.88757e-07	3.52414e-06	FALSE	high	Q9DB15	39S ribosomal protein L12, mitochondrial (L12mt; MRP-L12)	na	RM12_MOUSE	Q9DB15	B1ATZ3; Q3TKJ3; Q99JS8	Mrpl12	Rpml12	Mus musculus (Mouse)	10090	Q9DB15	MGI:1926273	Mrpl12	MGI:1926273			Acetylation; Mitochondrion; Ribonucleoprotein; Ribosomal protein; Transit peptide
391	Q99K48	Non-POU domain-containing octamer-binding protein OS=Mus musculus GN=Nono PE=1 SV=3 - [NONO_MOUSE]	13	26	61	31	528139	688454	550571	343981	628577	666436		567693	531507	645562	598605	350624	668038	606869	599383	534352	-1.1217	-0.319458	0.277871	0.359527	FALSE	no	Q99K48	Non-POU domain-containing octamer-binding protein (NonO protein)	na	NONO_MOUSE	Q99K48	Q63887; Q9CYQ4; Q9DBP2	Nono	na	Mus musculus (Mouse)	10090	Q99K48	MGI:1855692	Nono	MGI:1855692			3D-structure; Acetylation; Activator; Alternative splicing; Biological rhythms; Coiled coil; DNA damage; DNA recombination; DNA repair; DNA-binding; mRNA processing; mRNA splicing; Nucleus; Phosphoprotein; Repeat; Repressor; RNA-binding; Transcription; Transcription regulation
392	Q8CIN4	Serine/threonine-protein kinase PAK 2 OS=Mus musculus GN=Pak2 PE=1 SV=1 - [PAK2_MOUSE]	12	25	45	21	740300	491469	718130	427953	763320	261677		567142	745021	460850	780782	436218	811240	238288	779014	378452	-2.05842	-1.20854	5.42437e-05	0.000186257	FALSE	high	Q8CIN4	PAK-2p34	Gamma-PAK; p21-activated kinase 2 (PAK-2)	PAK2_MOUSE	Q8CIN4	na	Pak2	na	Mus musculus (Mouse)	10090	Q8CIN4	MGI:1339984	Pak2	MGI:1339984			Acetylation; Allosteric enzyme; Apoptosis; ATP-binding; Cytoplasm; Growth regulation; Kinase; Lipoprotein; Membrane; Nucleotide-binding; Nucleus; Phosphoprotein; Serine/threonine-protein kinase; Transferase; Ubl conjugation
393	Q8BP67	60S ribosomal protein L24 OS=Mus musculus GN=Rpl24 PE=1 SV=2 - [RL24_MOUSE]	7	11	19	13	682043	426752	737918	381617	843005	318620		564992	686392	400165	802297	388987	895927	290141	794872	359764	-2.20942	-1.25977	2.21553e-05	8.31517e-05	FALSE	high	Q8BP67	60S ribosomal protein L24	na	RL24_MOUSE	Q8BP67	P38663; Q58EA4	Rpl24	na	Mus musculus (Mouse)	10090	Q8BP67	MGI:1915443	Rpl24	MGI:1915443			Acetylation; Phosphoprotein; Ribonucleoprotein; Ribosomal protein
394	P27661	Histone H2AX OS=Mus musculus GN=H2afx PE=1 SV=2 - [H2AX_MOUSE]	2	9	65	17	463579	658986	451893	405979	449081	949739		563210	466535	617930	491318	413820	477273	864850	478375	632200	1.32156	0.227189	0.443387	0.527938	FALSE	no	P27661	Histone H2AX (H2a/x)	Histone H2A.X	H2AX_MOUSE	P27661	na	H2afx	H2a.x; H2ax; Hist5-2ax	Mus musculus (Mouse)	10090	P27661	MGI:102688	H2afx	MGI:102688			Acetylation; Cell cycle; Chromosome; DNA damage; DNA recombination; DNA repair; DNA-binding; Isopeptide bond; Meiosis; Nucleosome core; Nucleus; Phosphoprotein; Ubl conjugation
395	Q9WVJ2	26S proteasome non-ATPase regulatory subunit 13 OS=Mus musculus GN=Psmd13 PE=1 SV=1 - [PSD13_MOUSE]	15	19	41	23	517494	651956	502500	565268	506644	613875		559623	520794	611338	546340	576185	538450	559006	535195	582176	1.08778	0.0100714	0.972276	0.980982	FALSE	no	Q9WVJ2	26S proteasome non-ATPase regulatory subunit 13	26S proteasome regulatory subunit RPN9; 26S proteasome regulatory subunit S11; 26S proteasome regulatory subunit p40.5	PSD13_MOUSE	Q9WVJ2	Q3TB19; Q3TR74; Q542R0	Psmd13	na	Mus musculus (Mouse)	10090	Q9WVJ2	MGI:1345192	Psmd13	MGI:1345192			Acetylation; Proteasome
396	Q9CXI5	Mesencephalic astrocyte-derived neurotrophic factor OS=Mus musculus GN=Manf PE=1 SV=1 - [MANF_MOUSE]	9	11	23	15	396803	776795	322402	532508	381117	936139		557627	399333	728399	350529	542792	405043	852466	384968	707886	1.83881	0.746359	0.0107245	0.0207469	FALSE	med	Q9CXI5	Mesencephalic astrocyte-derived neurotrophic factor	Arginine-rich protein; Protein ARMET	MANF_MOUSE	Q9CXI5	na	Manf	Armet	Mus musculus (Mouse)	10090	Q9CXI5	MGI:1922090	Manf	MGI:1922090			3D-structure; Disulfide bond; Growth factor; Phosphoprotein; Secreted; Signal; Unfolded protein response
397	P68254	14-3-3 protein theta OS=Mus musculus GN=Ywhaq PE=1 SV=1 - [1433T_MOUSE]	9	19	50	17	849738	259867	785190	472488	797536	174603		556570	855156	243677	853693	481613	847604	158997	852151	294762	-2.89098	-1.80039	8.62525e-09	1.02817e-07	FALSE	high	P68254	14-3-3 protein theta	14-3-3 protein tau	1433T_MOUSE	P68254	P35216; Q3TW69; Q3UJN5; Q5SP76; Q5U423; Q66JR6	Ywhaq	na	Mus musculus (Mouse)	10090	P68254	MGI:891963	Ywhaq	MGI:891963			Acetylation; Alternative splicing; Cytoplasm; Phosphoprotein
398	Q9WTM5	RuvB-like 2 OS=Mus musculus GN=Ruvbl2 PE=2 SV=3 - [RUVB2_MOUSE]	16	30	51	20	550825	716085	561603	495179	594934	415022		555608	554337	671472	610599	504742	632283	377927	599073	518047	-1.15641	-0.357296	0.223759	0.298346	FALSE	no	Q9WTM5	RuvB-like 2	p47 protein	RUVB2_MOUSE	Q9WTM5	na	Ruvbl2	na	Mus musculus (Mouse)	10090	Q9WTM5	MGI:1342299	Ruvbl2	MGI:1342299			Acetylation; Activator; ATP-binding; Chromatin regulator; DNA damage; DNA recombination; DNA repair; Helicase; Hydrolase; Nucleotide-binding; Nucleus; Transcription; Transcription regulation
399	Q8BWY3	Eukaryotic peptide chain release factor subunit 1 OS=Mus musculus GN=Etf1 PE=1 SV=4 - [ERF1_MOUSE]	13	23	43	19	964759	275223	780407	366495	723389	223170		555574	970911	258076	848492	373573	768802	203223	862735	278291	-3.10012	-1.78352	4.0419e-09	5.45331e-08	FALSE	high	Q8BWY3	Eukaryotic peptide chain release factor subunit 1 (Eukaryotic release factor 1; eRF1)	na	ERF1_MOUSE	Q8BWY3	Q3TPZ6; Q91VH9	Etf1	na	Mus musculus (Mouse)	10090	Q8BWY3	MGI:2385071	Etf1	MGI:2385071			Acetylation; Cytoplasm; Host-virus interaction; Nonsense-mediated mRNA decay; Protein biosynthesis
400	P62717	60S ribosomal protein L18a OS=Mus musculus GN=Rpl18a PE=1 SV=1 - [RL18A_MOUSE]	9	16	36	19	859274	525985	647584	520939	390843	385766		555065	864753	493215	704081	531000	415379	351286	661405	458500	-1.44254	-0.596176	0.0426128	0.0707012	FALSE	low	P62717	60S ribosomal protein L18a	na	RL18A_MOUSE	P62717	P11249; Q3TSN0	Rpl18a	na	Mus musculus (Mouse)	10090	P62717	MGI:1924058	Rpl18a	MGI:1924058			Phosphoprotein; Ribonucleoprotein; Ribosomal protein
401	P50431	Serine hydroxymethyltransferase, cytosolic OS=Mus musculus GN=Shmt1 PE=1 SV=3 - [GLYC_MOUSE]	13	21	38	19	516686	593323	426991	505849	479848	797277		553329	519981	556358	464243	515618	509972	726015	498065	599331	1.20332	0.142053	0.62621	0.698824	FALSE	no	P50431	Serine hydroxymethyltransferase, cytosolic (SHMT)	Glycine hydroxymethyltransferase; Serine methylase	GLYC_MOUSE	P50431	Q64508; Q8R0X9	Shmt1	Shmt	Mus musculus (Mouse)	10090	P50431	MGI:98299	Shmt1	MGI:98299			3D-structure; Cytoplasm; One-carbon metabolism; Pyridoxal phosphate; Transferase
402	P17710	Hexokinase-1 OS=Mus musculus GN=Hk1 PE=1 SV=3 - [HXK1_MOUSE]	21	42	71	29	319735	1031460	292252	505338	296392	867016		552032	321774	967198	317749	515098	314999	789521	318174	757272	2.38006	1.09375	0.000220861	0.000644013	FALSE	high	P17710	Hexokinase-1	Hexokinase type I (HK I); Hexokinase, tumor isozyme	HXK1_MOUSE	P17710	E9PXQ3; Q61659; Q64476; Q64479	Hk1	na	Mus musculus (Mouse)	10090	P17710	MGI:96103	Hk1	MGI:96103			Allosteric enzyme; Alternative initiation; Alternative splicing; ATP-binding; Glycolysis; Kinase; Membrane; Mitochondrion; Mitochondrion outer membrane; Nucleotide-binding; Phosphoprotein; Repeat; Transferase
403	Q61881	DNA replication licensing factor MCM7 OS=Mus musculus GN=Mcm7 PE=1 SV=1 - [MCM7_MOUSE]	24	38	65	31	623537	693712	541190	453943	571342	424180		551317	627513	650492	588405	462710	607210	386266	607709	499823	-1.21585	-0.426346	0.143766	0.204697	FALSE	no	Q61881	DNA replication licensing factor MCM7	CDC47 homolog	MCM7_MOUSE	Q61881	na	Mcm7	Cdc47; Mcmd7	Mus musculus (Mouse)	10090	Q61881	MGI:1298398	Mcm7	MGI:1298398			Acetylation; ATP-binding; Cell cycle; DNA replication; DNA-binding; Glycoprotein; Helicase; Hydrolase; Nucleotide-binding; Nucleus; Phosphoprotein
404	Q8R050	Eukaryotic peptide chain release factor GTP-binding subunit ERF3A OS=Mus musculus GN=Gspt1 PE=1 SV=2 - [ERF3A_MOUSE]	18	32	45	18	796486	457892	672004	503346	637694	232535		549993	801565	429364	730632	513067	677727	211751	736641	384727	-1.91471	-1.14012	0.000145632	0.000446364	FALSE	high	Q8R050	Eukaryotic peptide chain release factor GTP-binding subunit ERF3A (Eukaryotic peptide chain release factor subunit 3a; eRF3a)	G1 to S phase transition protein 1 homolog	ERF3A_MOUSE	Q8R050	E9QK49; G3UWC0; O88179; Q8K2E1	Gspt1	Erf3a	Mus musculus (Mouse)	10090	Q8R050	MGI:1316728	Gspt1	MGI:1316728			3D-structure; Alternative splicing; GTP-binding; Nonsense-mediated mRNA decay; Nucleotide-binding; Protein biosynthesis
405	Q91V41	Ras-related protein Rab-14 OS=Mus musculus GN=Rab14 PE=1 SV=3 - [RAB14_MOUSE]	8	13	21	14	323932	834019	309616	713668	312867	802821		549487	325998	782058	336628	727451	332508	731064	331711	746858	2.25153	1.05963	0.000295713	0.000835001	FALSE	high	Q91V41	Ras-related protein Rab-14	na	RAB14_MOUSE	Q91V41	na	Rab14	na	Mus musculus (Mouse)	10090	Q91V41	MGI:1915615	Rab14	MGI:1915615			Acetylation; Cytoplasmic vesicle; Endosome; Golgi apparatus; GTP-binding; Lipoprotein; Membrane; Methylation; Nucleotide-binding; Prenylation; Protein transport; Transport
406	Q8R1B4	Eukaryotic translation initiation factor 3 subunit C OS=Mus musculus GN=Eif3c PE=1 SV=1 - [EIF3C_MOUSE]	19	31	54	24	785068	361081	591707	580885	594089	366954		546631	790074	338585	643330	592104	631385	334155	688263	421615	-1.63245	-0.86552	0.00395579	0.00858692	FALSE	high	Q8R1B4	Eukaryotic translation initiation factor 3 subunit C (eIF3c)	Eukaryotic translation initiation factor 3 subunit 8; eIF3 p110	EIF3C_MOUSE	Q8R1B4	Q8R3M7	Eif3c	Eif3s8	Mus musculus (Mouse)	10090	Q8R1B4	MGI:1926966	Eif3c	MGI:1926966			Acetylation; Cytoplasm; Initiation factor; Phosphoprotein; Protein biosynthesis
407	Q9ERK4	Exportin-2 OS=Mus musculus GN=Cse1l PE=2 SV=1 - [XPO2_MOUSE]	23	43	89	34	744131	503381	714588	325884	705093	268496		543596	748876	472019	776931	332178	749357	244497	758388	349565	-2.16952	-1.27981	1.67132e-05	6.48139e-05	FALSE	high	Q9ERK4	Exportin-2 (Exp2)	Chromosome segregation 1-like protein; Importin-alpha re-exporter	XPO2_MOUSE	Q9ERK4	na	Cse1l	Xpo2	Mus musculus (Mouse)	10090	Q9ERK4	MGI:1339951	Cse1l	MGI:1339951			Acetylation; Cytoplasm; Nucleus; Protein transport; Transport
408	Q6PDM2	Serine/arginine-rich splicing factor 1 OS=Mus musculus GN=Srsf1 PE=1 SV=3 - [SRSF1_MOUSE]	8	12	32	22	668573	600395	588905	245964	616637	530494		541828	672836	562989	640283	250714	655348	483078	656156	432260	-1.51796	-0.791514	0.00774509	0.0154167	FALSE	med	Q6PDM2	Serine/arginine-rich splicing factor 1	ASF/SF2; Pre-mRNA-splicing factor SRp30a; Splicing factor, arginine/serine-rich 1	SRSF1_MOUSE	Q6PDM2	B2KGJ5; Q3UCH2; Q5SXC5; Q8BJV3; Q8C1H9	Srsf1	Sfrs1	Mus musculus (Mouse)	10090	Q6PDM2	MGI:98283	Srsf1	MGI:98283			3D-structure; Acetylation; Alternative splicing; Cytoplasm; Methylation; mRNA processing; mRNA splicing; mRNA transport; Nucleus; Phosphoprotein; Repeat; RNA-binding; Spliceosome; Transport
409	Q9CR21	Acyl carrier protein, mitochondrial OS=Mus musculus GN=Ndufab1 PE=1 SV=1 - [ACPM_MOUSE]	5	8	20	13	241818	786574	236581	548635	253901	1165799		538885	243360	737569	257221	559231	269840	1.0616e+06	256807	786133	3.06118	1.45412	1.17128e-06	6.36429e-06	FALSE	high	Q9CR21	Acyl carrier protein, mitochondrial (ACP)	CI-SDAP; NADH-ubiquinone oxidoreductase 9.6 kDa subunit	ACPM_MOUSE	Q9CR21	Q9D726; Q9D7V5	Ndufab1	na	Mus musculus (Mouse)	10090	Q9CR21	MGI:1917566	Ndufab1	MGI:1917566			Acetylation; Electron transport; Fatty acid biosynthesis; Fatty acid metabolism; Lipid biosynthesis; Lipid metabolism; Mitochondrion; Phosphopantetheine; Phosphoprotein; Respiratory chain; Transit peptide; Transport
410	Q62470	Integrin alpha-3 OS=Mus musculus GN=Itga3 PE=1 SV=1 - [ITA3_MOUSE]	17	24	45	24	382237	706956	294733	1112326	344499	391878		538772	384674	662911	320447	1.13381e+06	366126	356851	357082	717857	2.01034	0.739985	0.0179207	0.0326722	FALSE	med	Q62470	Integrin alpha-3 light chain	CD49 antigen-like family member C; Galactoprotein B3 (GAPB3); VLA-3 subunit alpha; CD_antigen=CD49c	ITA3_MOUSE	Q62470	Q08441; Q08442; Q5SWA8; Q5SWB9; Q6P6I1	Itga3	na	Mus musculus (Mouse)	10090	Q62470	MGI:96602	Itga3	MGI:96602			Alternative splicing; Cell adhesion; Cell junction; Cell membrane; Cell projection; Cleavage on pair of basic residues; Disulfide bond; Glycoprotein; Integrin; Lipoprotein; Membrane; Palmitate; Receptor; Repeat; Signal; Transmembrane; Transmembrane helix
411	Q9CQ65	S-methyl-5'-thioadenosine phosphorylase OS=Mus musculus GN=Mtap PE=1 SV=1 - [MTAP_MOUSE]	13	18	43	24	883840	313293	685544	449078	698604	198887		538208	889476	293774	745353	457751	742461	181110	792430	310879	-2.549	-1.5608	3.52516e-07	2.33305e-06	FALSE	high	Q9CQ65	S-methyl-5'-thioadenosine phosphorylase	5'-methylthioadenosine phosphorylase (MTA phosphorylase; MTAP; MTAPase)	MTAP_MOUSE	Q9CQ65	Q3TJS4	Mtap	na	Mus musculus (Mouse)	10090	Q9CQ65	MGI:1914152	Mtap	MGI:1914152			Acetylation; Cytoplasm; Glycosyltransferase; Nucleus; Purine salvage; Transferase
412	Q9DCL9	Multifunctional protein ADE2 OS=Mus musculus GN=Paics PE=1 SV=4 - [PUR6_MOUSE]	20	26	62	31	739559	348750	697996	488386	715861	236261		537802	744275	327022	758892	497818	760801	215144	754656	346661	-2.17693	-1.31766	1.28088e-05	5.09922e-05	FALSE	high	Q9DCL9	Phosphoribosylaminoimidazole carboxylase	SAICAR synthetase; AIR carboxylase (AIRC)	PUR6_MOUSE	Q9DCL9	Q9CQ38	Paics	na	Mus musculus (Mouse)	10090	Q9DCL9	MGI:1914304	Paics	MGI:1914304			Acetylation; ATP-binding; Decarboxylase; Ligase; Lyase; Multifunctional enzyme; Nucleotide-binding; Phosphoprotein; Purine biosynthesis
413	P58771	Tropomyosin alpha-1 chain OS=Mus musculus GN=Tpm1 PE=1 SV=1 - [TPM1_MOUSE]	5	26	46	10	691895	379260	608268	663628	758360	122488		537316	696307	355631	661335	676445	805968	111540	721204	381205	-1.8919	-1.35969	0.00614952	0.0125747	FALSE	med	P58771	Tropomyosin alpha-1 chain	Alpha-tropomyosin; Tropomyosin-1	TPM1_MOUSE	P58771	P02558; P19354; P46902; P99034	Tpm1	Tpm-1; Tpma	Mus musculus (Mouse)	10090	P58771	MGI:98809	Tpm1	MGI:98809			Acetylation; Actin-binding; Alternative splicing; Coiled coil; Cytoplasm; Cytoskeleton; Isopeptide bond; Muscle protein; Phosphoprotein; Ubl conjugation
414	P62301	40S ribosomal protein S13 OS=Mus musculus GN=Rps13 PE=1 SV=2 - [RS13_MOUSE]	6	9	25	16	741922	302596	714483	417020	803524	240887		536739	746653	283744	776817	425074	853968	219356	792479	309391	-2.56141	-1.52068	4.82791e-07	3.00342e-06	FALSE	high	P62301	40S ribosomal protein S13	na	RS13_MOUSE	P62301	na	Rps13	na	Mus musculus (Mouse)	10090	P62301	MGI:1915302	Rps13	MGI:1915302			Acetylation; Phosphoprotein; Ribonucleoprotein; Ribosomal protein
415	P29758	Ornithine aminotransferase, mitochondrial OS=Mus musculus GN=Oat PE=1 SV=1 - [OAT_MOUSE]	15	22	35	18	252413	687837	265404	617736	304163	1091559		536519	254023	644983	288559	629666	323258	993994	288613	756215	2.62017	1.25257	2.24258e-05	8.40919e-05	FALSE	high	P29758	Ornithine aminotransferase, mitochondrial	Ornithine--oxo-acid aminotransferase	OAT_MOUSE	P29758	na	Oat	na	Mus musculus (Mouse)	10090	P29758	MGI:97394	Oat	MGI:97394			Acetylation; Aminotransferase; Mitochondrion; Pyridoxal phosphate; Transferase; Transit peptide
416	Q9WTP7	GTP:AMP phosphotransferase AK3, mitochondrial OS=Mus musculus GN=Ak3 PE=1 SV=3 - [KAD3_MOUSE]	12	16	28	16	268646	733252	238199	602986	255214	1116956		535876	270359	687569	258980	614631	271236	1.01712e+06	266858	773107	2.89707	1.38846	3.21542e-06	1.53666e-05	FALSE	high	Q9WTP7	GTP:AMP phosphotransferase AK3, mitochondrial	Adenylate kinase 3 (AK 3); Adenylate kinase 3 alpha-like 1	KAD3_MOUSE	Q9WTP7	Q3UDN7; Q8BGX5; Q9D7Z1; Q9DB57; Q9DBM5	Ak3	Ak3l; Ak3l1; Akl3l	Mus musculus (Mouse)	10090	Q9WTP7	MGI:1860835	Ak3	MGI:1860835			Acetylation; GTP-binding; Kinase; Mitochondrion; Nucleotide-binding; Transferase
417	O55143	Sarcoplasmic/endoplasmic reticulum calcium ATPase 2 OS=Mus musculus GN=Atp2a2 PE=1 SV=2 - [AT2A2_MOUSE]	17	42	83	24	292840	827883	267368	594739	269847	959268		535324	294707	776304	290694	606225	286787	873527	290730	752019	2.58666	1.24399	2.54953e-05	9.40056e-05	FALSE	high	O55143	Sarcoplasmic/endoplasmic reticulum calcium ATPase 2 (SERCA2; SR Ca(2+)-ATPase 2)	Calcium pump 2; Calcium-transporting ATPase sarcoplasmic reticulum type, slow twitch skeletal muscle isoform; Endoplasmic reticulum class 1/2 Ca(2+) ATPase	AT2A2_MOUSE	O55143	Q9R2A9; Q9WUT5	Atp2a2	na	Mus musculus (Mouse)	10090	O55143	MGI:88110	Atp2a2	MGI:88110			Alternative splicing; ATP-binding; Calcium; Calcium transport; Endoplasmic reticulum; Hydrolase; Ion transport; Isopeptide bond; Magnesium; Membrane; Metal-binding; Nitration; Nucleotide-binding; Phosphoprotein; Sarcoplasmic reticulum; Transmembrane; Transmembrane helix; Transport; Ubl conjugation
[truncated: 3,980 more rows]
